# Supplementary material for: AtfA-Independent Adaptation to the Toxic Heavy Metal Cadmium in Aspergillus nidulans
Source: MDPI journal article supplement (doi:10.3390/microorganisms9071433), 2021-07-02
Supplement: s1 [file s1]

**Table S1** RT-qPCR primer pairs used in the study.

| Gene                     | Foward primer                | Reverse primer               |
|--------------------------|------------------------------|------------------------------|
| AN0447                   | 5'-GACTTCCCTACCTCCTTCTTG-3'  | 5'-GCTCCACTCTTTTCCACGG-3'    |
| AN1092 ( <i>dugC</i> )   | 5'-ACTGCGAAAACCTGGAACGG-3'   | 5'-CTAAGAACAATGCGAATGCCC-3'  |
| AN1513 ( <i>cysF</i> )   | 5'-GGGGAAGGGGTACTTTGC-3'     | 5'-TAGAGCCACGCCAGAGATTG-3'   |
| AN1800 ( <i>icsB</i> )   | 5'-TCATACAATCCGCCTTACAGC-3'  | 5'-ATCCCAATCCTTCATCCCC-3'    |
| AN2508                   | 5'-GGACCAAGGAACACGACC-3'     | 5'-CGCATCAGCCCCAATCAAG-3'    |
| AN2581 ( <i>hk-8-1</i> ) | 5'-TGCTTCCTCAGTCCTCTC-3'     | 5'-ACAAATCCCGTCCTCCTTAG-3'   |
| AN2911 ( <i>atfA</i> )   | 5'-ACCGATACCCCCGATTAC-3'     | 5'-AAGCCCCCTCCGATACTG-3'     |
| AN3117 ( <i>crpA</i> )   | 5'-CTTCGTTGGTGGCGGATTAG-3'   | 5'-TCGGGTGATTGCTGCTTTC-3'    |
| AN3150 ( <i>gcsA</i> )   | 5'-AGGAGGGAGGTAGCAAAAG-3'    | 5'-CAGATGGAGGGTAATAAGGC-3'   |
| AN4113                   | 5'-TTCTCGCCAGCATCTTCGC-3'    | 5'-AGCCGTAGTTCGTCGTCAG-3'    |
| AN4271                   | 5'-ATGGTGCTCTCAGTTTGGTTG-3'  | 5'-GTGTCAATGCCCGTCGTTTTG-3'  |
| AN4376 ( <i>gdhA</i> )   | 5'-CGGCAAGTTCACCTACATCC-3'   | 5'-ACCCTCAGCAATATAGCGG-3'    |
| AN4809 ( <i>gtaA</i> )   | 5'-GACGCCGCTCCTATTCTCTG-3'   | 5'-ATTGCCTCTCGCTGGGTTAG-3'   |
| AN5134 ( <i>gltA</i> )   | 5'-TTACGGCGAGGGAAACAAG-3'    | 5'-CGAGAGTGAACGAGAGCAAAG-3'  |
| AN6542 ( <i>actA</i> )   | 5'-GAAGTCCTACGAACGCCTGATG-3' | 5'-AAGAACGCTGGGCTGGAA-3'     |
| AN6820 ( <i>hk-8-3</i> ) | 5'-GGCAGCGATGAGGACATTC-3'    | 5'-GGAGAGGGAGACATAGTGG-3'    |
| AN6838 ( <i>tubC</i> )   | 5'-CGGAAACTCGCCGTCAATAT-3'   | 5'-GGGCAAACCCGACAATAA-3'     |
| AN7103 ( <i>csH</i> )    | 5'-GAGTGGGACGGGAAGAATG-3'    | 5'-GGTTACGATGGGAGACAGC-3'    |
| AN7729                   | 5'-ACCTCGTTCCAACAATACGC-3'   | 5'-AACCCGAACAGAGCAACAAC-3'   |
| AN7945 ( <i>hk2</i> )    | 5'-CGATGTCACTTACGCCGC-3'     | 5'-AAACCGCTCTTGCTGCTG-3'     |
| AN8692 ( <i>prx</i> )    | 5'-CTGGACTGAGGAGAAGGG-3'     | 5'-CAAGGACGGCAACAACATCG-3'   |
| AN8803 ( <i>rodA</i> )   | 5'-CAACAAGGGCAACAGCAAC-3'    | 5'-GAGGACAGCAACATCAAGC-3'    |
| AN9397 ( <i>hacA</i> )   | 5'-AGACGAAGAATGTGGTGGC-3'    | 5'-ACGCTGAAGAAGGAACCTGG-3'   |
| AN10220 ( <i>ccpI</i> )  | 5'-GCGACCAAGAACCAAGACC-3'    | 5'-AACCAACAGGCGGAAAACTC-3'   |
| AN10584                  | 5'-GGTCTCTGTTTCGCTCTCTG-3'   | 5'-ACGTTTTGCCTCTTCATCATTC-3' |
