# Supplementary material for: AtfA-Independent Adaptation to the Toxic Heavy Metal Cadmium in Aspergillus nidulans
Source: MDPI journal article supplement (doi:10.3390/microorganisms9071433), 2021-07-02
Supplement: s1 [file s1]

**Table S2** Read mapping statistics.

| Sample                                            | Number of sequenced reads | Aligned reads (%) |
|---------------------------------------------------|---------------------------|-------------------|
| Reference strain, untreated, 1                    | 11 568 834                | 79.98             |
| Reference strain, untreated, 2                    | 14 894 686                | 88.54             |
| Reference strain, untreated, 3                    | 15 360 372                | 81.30             |
| Reference strain, CdCl <sub>2</sub> treated, 1    | 14 327 487                | 80.41             |
| Reference strain, CdCl <sub>2</sub> treated, 2    | 15 640 405                | 82.04             |
| Reference strain, CdCl <sub>2</sub> treated, 3    | 14 210 634                | 82.39             |
| <i>ΔatfA</i> mutant, untreated, 1                 | 15 698 460                | 88.04             |
| <i>ΔatfA</i> mutant, untreated, 2                 | 14 517 442                | 88.41             |
| <i>ΔatfA</i> mutant, untreated, 3                 | 16 011 236                | 90.19             |
| <i>ΔatfA</i> mutant, CdCl <sub>2</sub> treated, 1 | 14 219 473                | 91.1              |
| <i>ΔatfA</i> mutant, CdCl <sub>2</sub> treated, 2 | 14 747 338                | 89.53             |
| <i>ΔatfA</i> mutant, CdCl <sub>2</sub> treated, 3 | 15 069 078                | 90.16             |
