# Supplementary material for: AtfA-Independent Adaptation to the Toxic Heavy Metal Cadmium in Aspergillus nidulans
Source: MDPI journal article supplement (doi:10.3390/microorganisms9071433), 2021-07-02
Supplement: s1 [file s1]

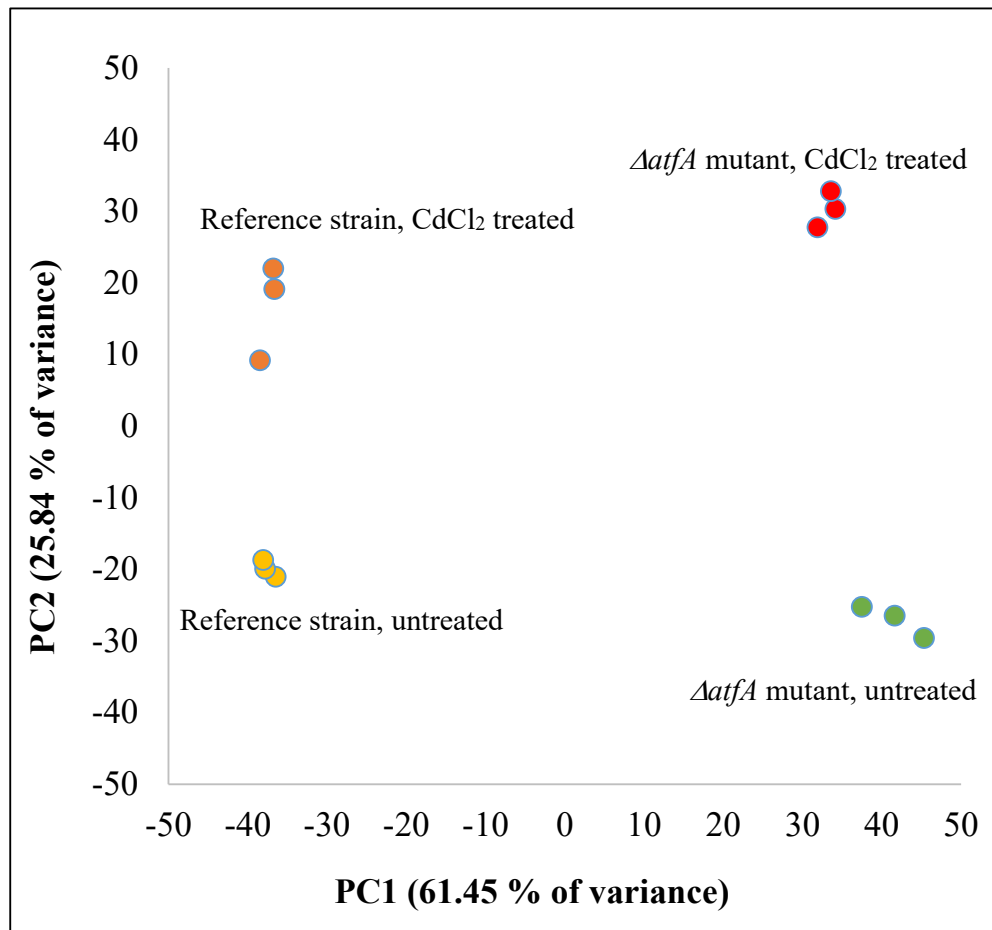

**Figure S1** Principal component analysis (PCA) of the transcriptomes of CdCl<sub>2</sub>-treated and untreated *A. nidulans* THS30 (reference strain) and TNJ92 ( $\Delta atfA$  mutant) cultures.

PCA was based on “regularized log” values using the “rlog” function from the DESeq2 package (Love et al, 2014).

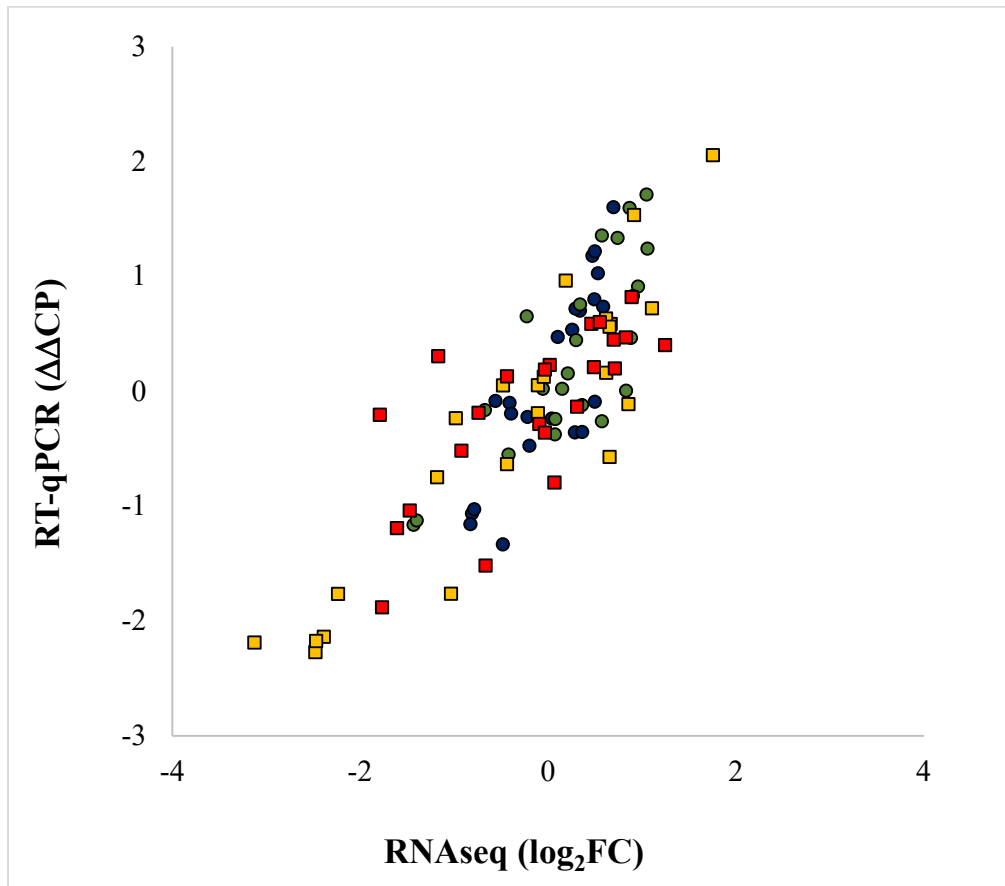

**Figure S2** Correlation between RNAseq and RT-qPCR data.

All RT-qPCR data are available in Table S3. The Pearson's correlation coefficients were as follows: 0.83 with data of CdCl<sub>2</sub>-treated vs. untreated cultures of the THS30 strain (●), 0.79 with data of CdCl<sub>2</sub>-treated vs. untreated cultures of the TNJ92 mutant (●), 0.91 with data of TNJ92 mutant vs. THS30 under untreated conditions (■) and 0.72 with data of TNJ92 mutant vs. THS30 under CdCl<sub>2</sub>-treated conditions (■).

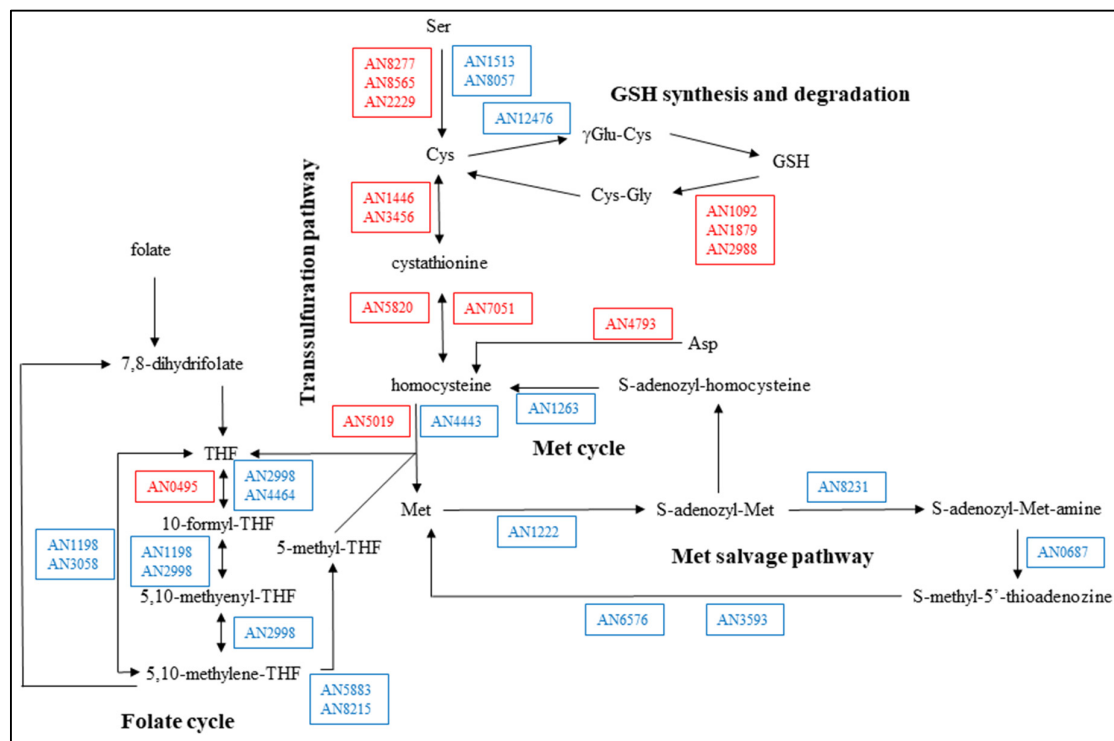

**Figure S3** Changes in the Cys and Met metabolism under  $CdCl_2$  treatment in the *A. nidulans* TNJ92  $\Delta atfA$  mutant.

Up-regulated genes are marked with red, down-regulated genes with blue.

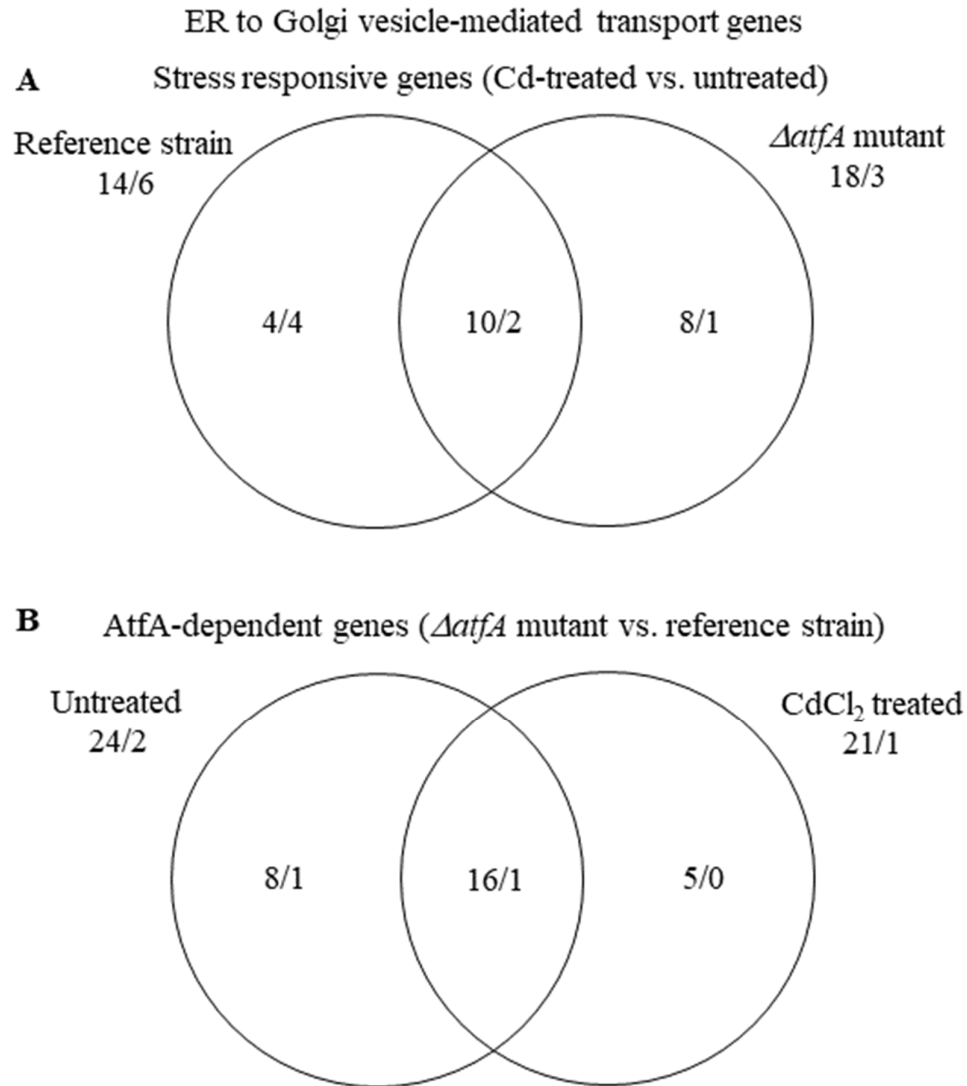

**Figure S4** Distribution of stress responsive “ER to Golgi vesicle-mediated transport” genes between the THS30 reference strain and the TNJ92 *ΔatfA* mutant (A) as well as of the AtfA-dependent “ER to Golgi vesicle-mediated transport” genes between the untreated and CdCl<sub>2</sub> treated cultures (B).

Figures represent the number of up-regulated/down-regulated genes. Further data on the gene group are available in Table S5.

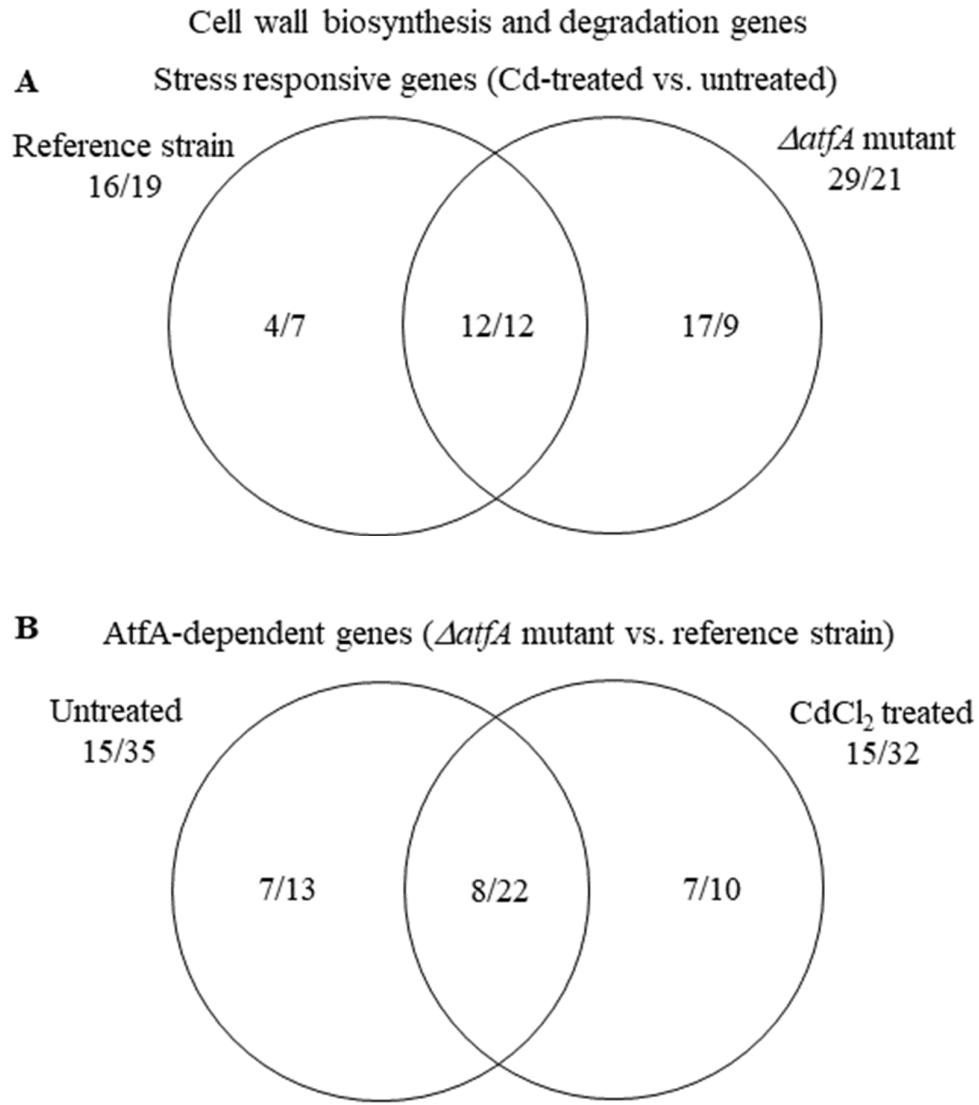

**Figure. S5** Distribution of stress responsive “Cell wall biosynthesis and degradation” genes between the THS30 reference strain and the TNJ92 *ΔatfA* mutant (A) as well as of the AtfA-dependent “Cell wall biosynthesis and degradation” genes between the untreated and CdCl<sub>2</sub> treated cultures (B).

Figures represent the number of up-regulated/down-regulated genes. Further data on the gene group are available in Table S5.

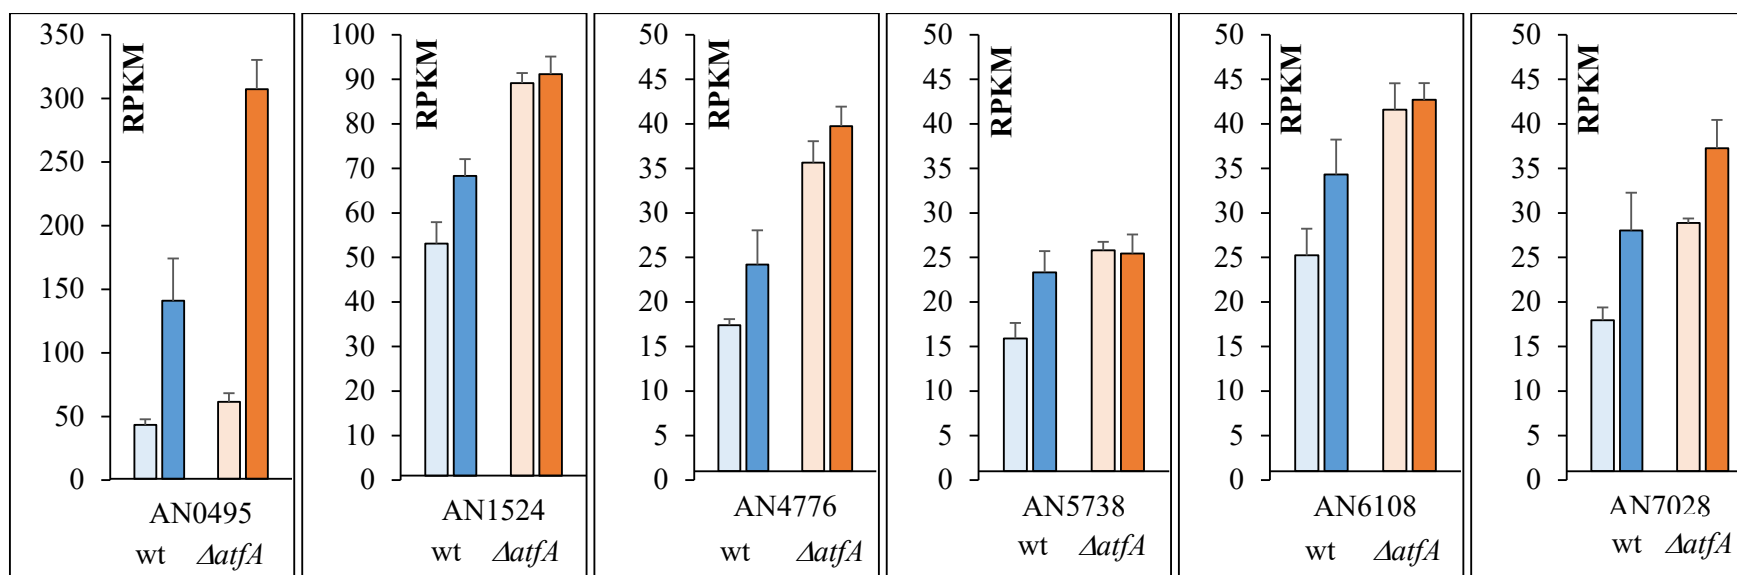

**Figure S6** Changes in the transcription of selected “Folate cycle” genes.

The mean RPKM values of the THS30 reference strain (wt; blue) and the TNJ92 mutant ( $\Delta atfA$ ; orange) under untreated (light colors) and CdCl<sub>2</sub> treated (dark colors) conditions are presented. Only data of genes were up-regulated in the reference strain after stress treatment are presented. The AN0495 gene showed up-regulation in the mutant as well. Error bars represent S.D. values. For further details of the genes see Table S5.

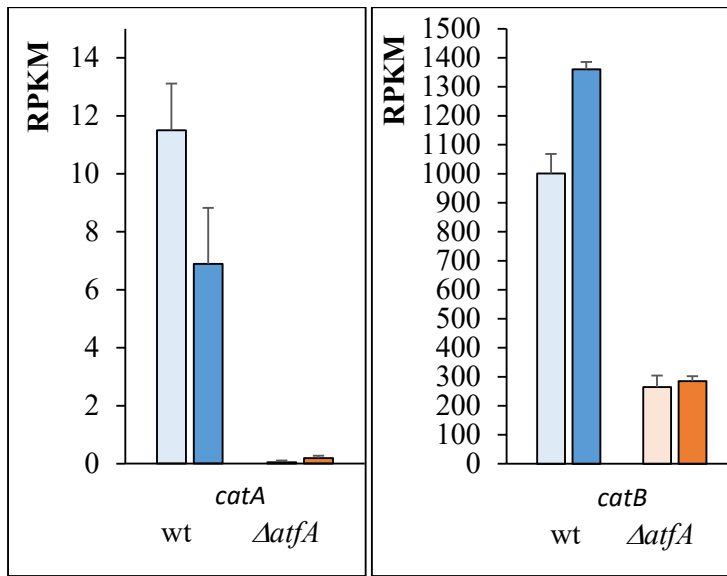

**Figure S7** Changes in the transcription of *catA* and *catB* catalase genes.

The mean RPKM values of the THS30 reference strain (wt; blue) and the TNJ92 mutant ( $\Delta atfA$ ; orange) under untreated (light colors) and CdCl<sub>2</sub> treated (dark colors) conditions are presented. Error bars represent S.D. values. For further details of the genes see Table S5.
