# Supplementary material for: AtfA-Independent Adaptation to the Toxic Heavy Metal Cadmium in Aspergillus nidulans
Source: Microorganisms. 2021 Jul 2;9(7):1433. doi: 10.3390/microorganisms9071433 (PMC8307709; doi:10.3390/microorganisms9071433)
Supplement: Supplementary file 1 [file microorganisms-09-01433-s001.zip]

Archive with 7 entries (7 files):
- Table S1.pdf
- Table S2.pdf
- Table S3.xlsx
- Table S4.xlsx
- Table S5new.xlsx
- Table S6new.xlsx
- Figures S1-S7.pdf
