# Supplementary material for: AtfA-Independent Adaptation to the Toxic Heavy Metal Cadmium in Aspergillus nidulans
Source: Microorganisms. 2021 Jul 2;9(7):1433. doi: 10.3390/microorganisms9071433 (PMC8307709; doi:10.3390/microorganisms9071433)
Supplement: Supplementary file 1 [file microorganisms-09-01433-s001.zip › Table S3.xlsx]

## Sheet: Munka1
	Supplementary Table S3 RT-qPCR data of the selected genes.
				RT-qPCR (DCP)a								RNAseq
				control, untreated		control, Cd treated		DatfA, untreated		DatfA, Cd treated		control, Cd treated vs. control, untreated		DatfA, Cd treated vs. DatfA, untreated		DatfA, untreated vs. control, untreated		DatfA, Cd treated vs. control, Cd treated
	GENE ID	Gene name	Feature (AspGD)	mean	SD	mean	SD	mean	SD	mean	SD	log2FC	adj. p-value	log2FC	adj. p-value	log2FC	adj. p-value	log2FC	adj. p-value
	AN0447		Ortholog(s) have mitochondrion localization	-3.225	0.65	-2.2	0.32	-3.06667	0.47543	-1.73333	0.236925	0.532368	1.24571e-06	0.74147	7.32336e-13	0.621869	3.69825e-09	0.830971	6.99539e-16
	AN10220	ccp1	Putatice cytochrome c peroxidase; intracellular; protein abundance decreased by menadione stress	-2.145	0.15	-1.34667	0.254034	-2.45	0.44	-1.49	0.5	0.494958	0.0140077	0.883457	1.92296e-06	-0.478767	0.0127135	-0.0902683	0.71379
	AN10584		Ortholog(s) have cysteine desulfurase activity, role in iron-sulfur cluster assembly and L-cysteine desulfurase complex, extrinsic component of mitochondrial inner membrane, mitochondrial matrix, nucleus localization	-2.765	0.883883	-2.295	0.00707107	-1.23333	0.44	-1.47667	0.151767	0.104784	0.512486	0.0800608	0.59102	0.917226	2.4579e-14	0.892503	8.41513e-14
	AN1092	dugC	Ortholog(s) have glutathione hydrolase activity, omega peptidase activity, role in glutathione catabolic process and cytoplasm, glutathione hydrolase complex localization	-4.74333	0.250267	-3.52667	0.328684	-4.69333	0.152753	-3.34	0.25	0.499613	4.89513e-05	0.574818	8.02789e-07	-0.106904	0.446129	-0.0316994	0.840567
	AN1513	cysF	Putative cysteine synthase or cystathionine beta-synthase with a predicted role in amino acid metabolism	-7.53333	0.300222	-7.62667	0.50362	-7.72667	0.18	-7.99	0.591016	-0.0836129	0.683321	-0.670317	1.80367e-06	0.656264	5.19786e-06	0.0695605	0.724533
	AN1800	tcsB	Transmembrane histidine kinase, part of a two-component signal transducer involved in the HOG signaling pathway that regulates osmotic stress response' transcript upregulated by growth in glycerol	-2.09	0.212132	-2.19333	0.807548	-4.23	0.425323	-4.07667	0.085049	-0.407588	0.00103481	0.213112	0.115645	-2.38475	1.00414e-95	-1.76405	3.24079e-53
	AN2508		Ortholog(s) have cysteine desulfurase activity and role in cellular iron ion homeostasis, iron-sulfur cluster assembly, mitochondrial tRNA thio-modification, tRNA wobble position uridine thiolation	-3.74	0.700214	-2.56333	0.487887	-3.11	0.466047	-2.35667	0.159478	0.473026	2.58126e-05	0.342622	0.0016931	0.619795	6.62458e-09	0.489391	5.05246e-06
	AN2581	hk-8-1	Putative histidine-containing phosphotransfer protein	-11.3067	0.427707	-12.4667	0.150111	-13.4833	0.345302	-12.6567	0.327465	-0.824442	1.70367e-09	0.904649	2.6294e-10	-2.466	5.86095e-74	-0.736912	9.37022e-08
	AN2911	atfA	Basic-region leucine zipper transcription factor; plays a role in the response of conidia to stress; expression upregulated after exposure to farnesol	-2.24	0.71	-3.575	0.597419	-18.82	0.71886	-19.0817	0.351876	-0.479801	0.000154998	-0.377695	0.00969301	-3.62549	5.6546e-191	-3.52339	1.0506e-174
	AN3117	crpA	Ortholog(s) have copper-exporting ATPase activity, role in cadmium ion transport, cellular copper ion homeostasis, copper ion transport, silver ion transport and plasma membrane localization	-6.43	0.395095	-5.69667	0.330807	-7.18	0.25	-6.73667	0.1	0.589314	1.90401e-05	0.300238	0.0367206	-1.18034	1.43955e-19	-1.46941	4.4764e-30
	AN3150		Putative gamma-glutamylcysteine synthetase with a predicted role in glutathione biosynthesis	-1.255	0.14	-1.48	0.52915	-3.02	0.51	-3	0.35	-0.216737	0.390448	0.1516	0.546518	-1.03155	3.84739e-07	-0.663217	0.00180289
	AN4113	hk-8-2	Histidine kinase, histidine-containing phosphotransfer protein; expression upregulated after exposure to farnesol; palA-dependent expression independent of pH	-4.88333	0.0757188	-4.97	0.507642	-7.07333	0.330051	-6.16333	0.051316	-0.558357	1.48405e-05	0.95889	7.10488e-14	-3.12289	1.1707e-143	-1.60564	8.31427e-40
	AN4271		Ortholog(s) have role in nucleotide-excision repair and mitotic spindle pole body, nucleotide-excision repair complex localization	-4.78667	0.237557	-4.73	0.288271	-5.36	0.32	-5.52667	0.305014	0.25956	0.132772	-0.225571	0.196109	-0.43478	0.00590917	-0.919911	9.76401e-10
	AN4376	gdhA	Putative NADP-linked glutamate dehydrogenase; predicted role in glutamate/glutamine metabolism; involved in nitrogen catabolite repression; induced by low nitrate; intracellular, menadione stress-induced protein; protein induced by farnesol	-0.483333	0.202073	-1.55	0.121244	-0.596667	0.184481	-1.15	0.32	-0.807872	5.88125e-07	-0.418587	0.0113868	0.858718	3.82448e-08	1.248	6.38587e-16
	AN4809	gtaA	Putative glutaminase A with a predicted role in glutamate and glutamine metabolism	-5.37667	0.230723	-5.73667	0.492375	-5.61333	0.481906	-5.61	0.435546	-0.392106	0.093578	0.363429	0.0955368	-0.043049	0.868088	0.712485	0.000645145
	AN5134	gltA	Glutamate synthase, NAD(+)-dependent (GOGAT) with a predicted role in glutamate and glutamine metabolism; required for ammonium uptake in the absence of NADP-glutamate dehydrogenase GdhA; transcript upregulated by nitrate limitation	-1.385	0.148492	-2.415	0.148492	-0.665	0.13435	-1.83	0.35	-0.783384	2.66661e-06	-1.42974	1.28677e-19	1.10826	2.96984e-12	0.461898	0.0068817
	AN6820	hk-8-3	Putative histidine-containing phosphotransfer protein	-6.18	0.326037	-6.53667	0.506195	-8.45333	0.442305	-6.74333	0.176163	0.365259	0.000225101	1.05045	3.55009e-23	-2.4744	5.7547e-133	-1.78921	8.17943e-82
	AN6838	tubC	Beta-tubulin, highly conserved component of microtubules; A. nidulans has two beta-tubulin genes, tubC and benA; expression of tubC increases during conidiation	-3.31667	0.118462	-3.51333	0.492172	-3.19333	0.14	-3.31667	0.572917	0.166238	0.0361879	-0.623477	4.30107e-19	0.234832	0.00130043	-0.554883	2.65917e-15
	AN7103	cshA	Protein with homology to Cockayne's syndrome nucleotide excision repair protein; transcript upregulated in response to camptothecin	-4.13	0.202237	-3.59667	0.20502	-4.76667	0.4	-4.11667	0.192959	0.287582	0.00257089	0.832553	5.4887e-20	-0.980419	4.16525e-27	-0.435449	1.03736e-06
	AN7729		Ortholog(s) have bilirubin transmembrane transporter activity, glutathione S-conjugate-exporting ATPase activity, phytochelatin transmembrane transporter ATPase activity	-5.01	0.5	-3.41	0.28	-4.05	0.1	-2.81	0.12	0.697471	1.92446e-08	1.05982	2.23705e-19	0.189329	0.156587	0.551678	5.60209e-06
	AN7945	hk2	Putative histidine-containing phosphotransfer protein	-7.44	0.468722	-7.91667	0.172143	-9.20667	0.0702377	-7.61333	0.085049	-0.196534	0.524212	0.869889	0.00369693	-2.23397	1.38694e-16	-1.16755	4.89486e-06
	AN8692	prxA	Thioredoxin-dependent peroxidase; intracellular; PRX5-like domain; highly similar to the allergen Aspf3 from related fungi; menadione stress-repressed protein; osmoadaptation-induced protein; repressed by starvation-induced autophagy	0.296667	0.35	0.0566667	0.398037	0.88	0.127279	0.503333	0.551392	0.0408487	0.799099	0.0740662	0.599609	0.66845	2.14964e-09	0.701667	3.93733e-10
	AN8803	rodA	Hydrophobin; protein involved in conidium development; required for the formation of outer hydrophobic layer (rodlet layer) of the conidium wall; transcriptionally regulated by BrlA; predicted glycosylphosphatidylinositol (GPI)-anchor	-7.21333	0.575702	-6.51333	0.453578	-5.16	0.954411	-6.28667	0.323471	0.341515	0.823661	-1.39581	0.249935	1.7579	0.128396	0.0205697	0.990017
	AN9397	hacA	Putative basic leucine zipper (bZIP) transcription factor that regulates the unfolded protein response; hacA mRNA expression increased in the presence of farnesol	-3.17	0.632376	-2.45333	0.482217	-2.61	0.238956	-2.59	0.260576	0.293843	0.0109765	-0.0531003	0.695477	0.656904	3.43711e-10	0.309961	0.00533527
	Mean ± SD values calculated from three biological replicates are presented. The actA gene (AN6542) was used as reference gene.
	Significant differences (Studen's t-test, n=3, p<0.05) between the relative transcription values (DCP) of the treated and the appropriate untreated cultures are marked with green color.
	Significant differences (Studen's t-test, n=3, p<0.05) between the relative transcription values (DCP) of the DatfA mutant and the reference strain are highlighted with orange color.
	The log2FC values of differentially up-regulated and down-regulated genes are marked with red and blue colors, respectively.
