# Supplementary material for: AtfA-Independent Adaptation to the Toxic Heavy Metal Cadmium in Aspergillus nidulans
Source: Microorganisms. 2021 Jul 2;9(7):1433. doi: 10.3390/microorganisms9071433 (PMC8307709; doi:10.3390/microorganisms9071433)
Supplement: Supplementary file 1 [file microorganisms-09-01433-s001.zip › Table S4.xlsx]

## Sheet: Overview
	Supplementary Table S4 Significantly enriched FunCat, GO and KEGG pathway terms.
	Sheet 1 - reference strain Cd treated vs. reference strain untreated
	Sheet 2 - DatfA mutant Cd treated vs. DatfA mutant untreated
	Sheet 3 - DatfA mutant untreated vs. reference strain untreated
	Sheet 4 - DatfA mutant Cd treated vs. reference strain Cd treated

## Sheet: Sheet 1
Supplementary Table S4 Significantly enriched FunCat, GO and KEGG pathway terms.
Sheet 1 - reference strain Cd treated vs. reference strain untreated
ct vs cc	down-regulated genes	reference strain Cd treated vs. reference strain untreated
FunCat
FunCat ID	FunCat description	FunCat main category	Gene ID(s)	Exact p-value	Adjusted p-value	# genes / category	# genes / input
12.01.01	ribosomal proteins	Protein synthesis	ANIA_00142 | ANIA_00262 | ANIA_00278 | ANIA_00293 | ANIA_00433 | ANIA_00445 | ANIA_00465 | ANIA_00570 | ANIA_00776 | ANIA_00843 | ANIA_00907 | ANIA_01013 | ANIA_01095 | ANIA_01122 | ANIA_01166 | ANIA_01228 | ANIA_01256 | ANIA_01345 | ANIA_01964 | ANIA_02057 | ANIA_02275 | ANIA_02301 | ANIA_02734 | ANIA_02980 | ANIA_03172 | ANIA_03413 | ANIA_03551 | ANIA_03635 | ANIA_03706 | ANIA_03823 | ANIA_0406…	3.456181e-23	1.817951e-20	90 / 165	90 / 1985
12.04	translation	Protein synthesis	ANIA_00142 | ANIA_00262 | ANIA_00278 | ANIA_00314 | ANIA_00445 | ANIA_00465 | ANIA_00570 | ANIA_00776 | ANIA_00843 | ANIA_00936 | ANIA_01013 | ANIA_01084 | ANIA_01095 | ANIA_01122 | ANIA_01166 | ANIA_01228 | ANIA_01345 | ANIA_01964 | ANIA_02057 | ANIA_02275 | ANIA_02301 | ANIA_02734 | ANIA_02900 | ANIA_02980 | ANIA_02989 | ANIA_02997 | ANIA_03172 | ANIA_03413 | ANIA_03706 | ANIA_04015 | ANIA_0403…	7.758869e-21	2.040583e-18	90 / 175	90 / 1985
02.13.03	aerobic respiration	Energy	ANIA_00252 | ANIA_00357 | ANIA_00395 | ANIA_00432 | ANIA_00747 | ANIA_00802 | ANIA_00896 | ANIA_01063 | ANIA_01094 | ANIA_01444 | ANIA_01523 | ANIA_01624 | ANIA_01722 | ANIA_01915 | ANIA_02052 | ANIA_02099 | ANIA_02260 | ANIA_02306 | ANIA_02315 | ANIA_02316 | ANIA_02332 | ANIA_02414 | ANIA_02900 | ANIA_02916 | ANIA_03011 | ANIA_04064 | ANIA_04288 | ANIA_04297 | ANIA_04388 | ANIA_04402 | ANIA_0446…	3.953095e-19	6.931093e-17	58 / 93	58 / 1985
2.11	electron transport and membrane-associated energy conservation	Energy	ANIA_00252 | ANIA_00357 | ANIA_00432 | ANIA_00747 | ANIA_00876 | ANIA_00896 | ANIA_00943 | ANIA_01063 | ANIA_01094 | ANIA_01444 | ANIA_01523 | ANIA_01534 | ANIA_01543 | ANIA_01624 | ANIA_01689 | ANIA_01699 | ANIA_02306 | ANIA_02315 | ANIA_02316 | ANIA_02332 | ANIA_02414 | ANIA_02590 | ANIA_02682 | ANIA_02762 | ANIA_02916 | ANIA_03901 | ANIA_04288 | ANIA_04297 | ANIA_04300 | ANIA_04388 | ANIA_0452…	1.57362e-15	2.06931e-13	61 / 114	61 / 1985
02.11.05	accessory proteins of electron transport and membrane-associated energy conservation	Energy	ANIA_00357 | ANIA_00747 | ANIA_01063 | ANIA_01722 | ANIA_02069 | ANIA_02260 | ANIA_02306 | ANIA_02332 | ANIA_02414 | ANIA_02916 | ANIA_04288 | ANIA_04297 | ANIA_04388 | ANIA_04977 | ANIA_05629 | ANIA_05703 | ANIA_06077 | ANIA_06255 | ANIA_06557 | ANIA_06976 | ANIA_07450 | ANIA_08049 | ANIA_08118 | ANIA_08130 | ANIA_08273 | ANIA_08763 | ANIA_08793 | ANIA_10229 | ANIA_10278 | ANIA_10440	5.716851e-12	6.014127e-10	30 / 44	30 / 1985
12.01	ribosome biogenesis	Protein synthesis	ANIA_00142 | ANIA_00262 | ANIA_00445 | ANIA_00465 | ANIA_00570 | ANIA_00641 | ANIA_00776 | ANIA_00843 | ANIA_00907 | ANIA_01013 | ANIA_01122 | ANIA_01228 | ANIA_01345 | ANIA_01393 | ANIA_01964 | ANIA_02057 | ANIA_02275 | ANIA_02301 | ANIA_02734 | ANIA_02980 | ANIA_03172 | ANIA_03413 | ANIA_03595 | ANIA_03598 | ANIA_03706 | ANIA_03823 | ANIA_04060 | ANIA_04087 | ANIA_04163 | ANIA_04202 | ANIA_0422…	4.059876e-10	3.559158e-8	70 / 173	70 / 1985
16.21.08	Fe/S binding	Protein with binding function or cofactor requirement (structural or analytic)	ANIA_00747 | ANIA_00896 | ANIA_01063 | ANIA_02306 | ANIA_02332 | ANIA_02414 | ANIA_02916 | ANIA_04288 | ANIA_04297 | ANIA_04388 | ANIA_04977 | ANIA_05525 | ANIA_05629 | ANIA_05703 | ANIA_06077 | ANIA_06557 | ANIA_07752 | ANIA_08049 | ANIA_08273 | ANIA_08763 | ANIA_08793 | ANIA_09103 | ANIA_10229 | ANIA_10440	1.725518e-8	1.2966e-06	24 / 39	24 / 1985
2.1	tricarboxylic-acid pathway (citrate cycle, Krebs cycle, TCA cycle)	Energy	ANIA_00896 | ANIA_01003 | ANIA_01103 | ANIA_01193 | ANIA_01543 | ANIA_02295 | ANIA_02332 | ANIA_02436 | ANIA_02916 | ANIA_02999 | ANIA_03466 | ANIA_04376 | ANIA_05162 | ANIA_05206 | ANIA_05525 | ANIA_05571 | ANIA_05626 | ANIA_05828 | ANIA_05833 | ANIA_06168 | ANIA_06499 | ANIA_06521 | ANIA_06650 | ANIA_06708 | ANIA_06717 | ANIA_08275 | ANIA_08707 | ANIA_08793 | ANIA_09403	4.1696e-8	2.74151e-06	29 / 54	29 / 1985
01.05.02.04	sugar, glucoside, polyol and carboxylate anabolism	Metabolism	ANIA_00240 | ANIA_00688 | ANIA_01003 | ANIA_01246 | ANIA_01418 | ANIA_02332 | ANIA_02440 | ANIA_02867 | ANIA_02916 | ANIA_03312 | ANIA_03466 | ANIA_04255 | ANIA_04372 | ANIA_04727 | ANIA_04957 | ANIA_05206 | ANIA_05523 | ANIA_05525 | ANIA_05547 | ANIA_05571 | ANIA_05604 | ANIA_05635 | ANIA_05728 | ANIA_05737 | ANIA_06182 | ANIA_06499 | ANIA_06650 | ANIA_06717 | ANIA_07590 | ANIA_07625 | ANIA_0804…	3.633877e-7	2.1238e-05	40 / 93	40 / 1985
2.13	respiration	Energy	ANIA_00252 | ANIA_00357 | ANIA_00432 | ANIA_00554 | ANIA_00802 | ANIA_00896 | ANIA_00943 | ANIA_01094 | ANIA_01523 | ANIA_01534 | ANIA_01543 | ANIA_01624 | ANIA_01689 | ANIA_01915 | ANIA_02069 | ANIA_02099 | ANIA_02306 | ANIA_02315 | ANIA_02590 | ANIA_03843 | ANIA_03901 | ANIA_03922 | ANIA_04297 | ANIA_04525 | ANIA_04792 | ANIA_04977 | ANIA_05670 | ANIA_05828 | ANIA_05971 | ANIA_06287 | ANIA_0636…	7.99338e-7	4.20452e-05	39 / 92	39 / 1985
01.07.01	biosynthesis of vitamins, cofactors, and prosthetic groups	Metabolism	ANIA_00121 | ANIA_00554 | ANIA_00670 | ANIA_00687 | ANIA_00836 | ANIA_00947 | ANIA_00991 | ANIA_01403 | ANIA_01722 | ANIA_01915 | ANIA_02435 | ANIA_02436 | ANIA_02493 | ANIA_02733 | ANIA_02998 | ANIA_03431 | ANIA_03586 | ANIA_03778 | ANIA_03840 | ANIA_03846 | ANIA_03920 | ANIA_03928 | ANIA_04231 | ANIA_04384 | ANIA_04774 | ANIA_05497 | ANIA_05626 | ANIA_05833 | ANIA_05883 | ANIA_05952 | ANIA_0597…	2.34004e-05	0.00111897	53 / 155	53 / 1985
20.01.15	electron transport	Cellular transport, transport facilitation and transport routes	ANIA_00170 | ANIA_00252 | ANIA_00357 | ANIA_00432 | ANIA_00554 | ANIA_00567 | ANIA_00747 | ANIA_00836 | ANIA_00896 | ANIA_00943 | ANIA_01003 | ANIA_01063 | ANIA_01094 | ANIA_01523 | ANIA_01534 | ANIA_01543 | ANIA_01624 | ANIA_01689 | ANIA_01733 | ANIA_01763 | ANIA_02069 | ANIA_02260 | ANIA_02306 | ANIA_02315 | ANIA_02316 | ANIA_02332 | ANIA_02414 | ANIA_02590 | ANIA_02596 | ANIA_02682 | ANIA_0272…	6.78971e-05	0.00297616	95 / 330	95 / 1985
16.21.07	NAD/NADP binding	Protein with binding function or cofactor requirement (structural or analytic)	ANIA_00052 | ANIA_00179 | ANIA_00554 | ANIA_00567 | ANIA_00701 | ANIA_00775 | ANIA_01003 | ANIA_01063 | ANIA_01132 | ANIA_01274 | ANIA_01543 | ANIA_01689 | ANIA_01763 | ANIA_01868 | ANIA_02414 | ANIA_02998 | ANIA_02999 | ANIA_03206 | ANIA_03591 | ANIA_03829 | ANIA_03920 | ANIA_03954 | ANIA_04006 | ANIA_04094 | ANIA_04288 | ANIA_04297 | ANIA_04376 | ANIA_04727 | ANIA_04792 | ANIA_04820 | ANIA_0510…	0.000119113	0.00481949	64 / 207	64 / 1985
01.20.19.01	metabolism of porphyrins	Metabolism	ANIA_00121 | ANIA_01403 | ANIA_01722 | ANIA_01915 | ANIA_02733 | ANIA_03920 | ANIA_04415 | ANIA_04774 | ANIA_05132 | ANIA_06635 | ANIA_06645 | ANIA_07752 | ANIA_10829 | ANIA_10879	0.000235457	0.00884645	14 / 27	14 / 1985
2.01	glycolysis and gluconeogenesis	Energy	ANIA_00688 | ANIA_00689 | ANIA_01246 | ANIA_01918 | ANIA_02334 | ANIA_02867 | ANIA_02875 | ANIA_03059 | ANIA_03184 | ANIA_04255 | ANIA_04462 | ANIA_04727 | ANIA_05162 | ANIA_05571 | ANIA_05604 | ANIA_05634 | ANIA_05644 | ANIA_05728 | ANIA_05746 | ANIA_05833 | ANIA_05908 | ANIA_06568 | ANIA_06653 | ANIA_06708 | ANIA_06900 | ANIA_07459 | ANIA_08041 | ANIA_08720 | ANIA_09148 | ANIA_09403 | ANIA_0942…	0.00027225	0.00954691	32 / 88	32 / 1985
02.45.15	energy generation (e.g. ATP synthase)	Energy	ANIA_00252 | ANIA_00357 | ANIA_00943 | ANIA_01523 | ANIA_01534 | ANIA_01624 | ANIA_02315 | ANIA_05998 | ANIA_06287 | ANIA_06631 | ANIA_11303 | ANIA_11444	0.000359962	0.0118337	12 / 22	12 / 1985
01.05.05.07	C-1 compound catabolism	Metabolism	ANIA_00293 | ANIA_01074 | ANIA_01198 | ANIA_02998 | ANIA_03058 | ANIA_06525 | ANIA_08782 | ANIA_10745 | ANIA_10901	0.00080806	0.0250023	9 / 15	9 / 1985
20.09.04	mitochondrial transport	Cellular transport, transport facilitation and transport routes	ANIA_00252 | ANIA_00716 | ANIA_00870 | ANIA_00896 | ANIA_01059 | ANIA_01269 | ANIA_01523 | ANIA_01534 | ANIA_01795 | ANIA_01917 | ANIA_02052 | ANIA_02288 | ANIA_02315 | ANIA_02646 | ANIA_03461 | ANIA_03876 | ANIA_04064 | ANIA_04250 | ANIA_04387 | ANIA_04402 | ANIA_04559 | ANIA_05132 | ANIA_05693 | ANIA_06287 | ANIA_06306 | ANIA_06631 | ANIA_07287 | ANIA_07304 | ANIA_07569 | ANIA_08274 | ANIA_0879…	0.000992757	0.0290106	37 / 113	37 / 1985
01.03.01	purin nucleotide/nucleoside/nucleobase metabolism	Metabolism	ANIA_00081 | ANIA_00200 | ANIA_00259 | ANIA_00316 | ANIA_00670 | ANIA_00893 | ANIA_01103 | ANIA_01194 | ANIA_01222 | ANIA_01246 | ANIA_01769 | ANIA_01912 | ANIA_02272 | ANIA_02998 | ANIA_03058 | ANIA_03194 | ANIA_03438 | ANIA_03748 | ANIA_03779 | ANIA_04075 | ANIA_04258 | ANIA_04464 | ANIA_04685 | ANIA_04690 | ANIA_04739 | ANIA_04743 | ANIA_04769 | ANIA_05122 | ANIA_05939 | ANIA_06157 | ANIA_0654…	0.00122957	0.0340398	39 / 122	39 / 1985
GO
GO ID	GO name	GO namespace	Gene ID(s)	Exact p-value	Adjusted p-value	# genes / category	# genes / input
GO:0003735	structural constituent of ribosome	MF	ANIA_00142 | ANIA_00445 | ANIA_00465 | ANIA_00570 | ANIA_00776 | ANIA_00907 | ANIA_01013 | ANIA_01095 | ANIA_01228 | ANIA_01345 | ANIA_01393 | ANIA_01964 | ANIA_02057 | ANIA_02734 | ANIA_02980 | ANIA_03413 | ANIA_03823 | ANIA_04073 | ANIA_04087 | ANIA_04222 | ANIA_04452 | ANIA_04475 | ANIA_04522 | ANIA_04594 | ANIA_04777 | ANIA_04802 | ANIA_04803 | ANIA_04872 | ANIA_04916 | ANIA_05222 | ANIA_0544…	4.111078e-33	4.908627e-30	74 / 103	74 / 1985
GO:0005840	ribosome	CC	ANIA_00142 | ANIA_00445 | ANIA_00465 | ANIA_00570 | ANIA_00776 | ANIA_00907 | ANIA_01013 | ANIA_01095 | ANIA_01228 | ANIA_01345 | ANIA_01964 | ANIA_02057 | ANIA_02734 | ANIA_02980 | ANIA_03413 | ANIA_03595 | ANIA_03823 | ANIA_04073 | ANIA_04087 | ANIA_04222 | ANIA_04452 | ANIA_04475 | ANIA_04522 | ANIA_04594 | ANIA_04777 | ANIA_04802 | ANIA_04803 | ANIA_04872 | ANIA_04916 | ANIA_05222 | ANIA_0544…	1.874841e-31	1.11928e-28	79 / 119	79 / 1985
GO:0006412	translation	BP	ANIA_00142 | ANIA_00314 | ANIA_00428 | ANIA_00445 | ANIA_00465 | ANIA_00570 | ANIA_00776 | ANIA_00907 | ANIA_01013 | ANIA_01095 | ANIA_01228 | ANIA_01345 | ANIA_01393 | ANIA_01964 | ANIA_02057 | ANIA_02980 | ANIA_03413 | ANIA_03823 | ANIA_04073 | ANIA_04087 | ANIA_04222 | ANIA_04452 | ANIA_04475 | ANIA_04522 | ANIA_04594 | ANIA_04777 | ANIA_04802 | ANIA_04803 | ANIA_04872 | ANIA_04916 | ANIA_0522…	2.41196e-28	9.599599e-26	78 / 125	78 / 1985
GO:0005622	intracellular	CC	ANIA_00184 | ANIA_00240 | ANIA_00395 | ANIA_00445 | ANIA_00465 | ANIA_00570 | ANIA_00776 | ANIA_00895 | ANIA_00927 | ANIA_01013 | ANIA_01228 | ANIA_01345 | ANIA_01689 | ANIA_01964 | ANIA_02057 | ANIA_02130 | ANIA_02734 | ANIA_02875 | ANIA_02980 | ANIA_03746 | ANIA_03823 | ANIA_04034 | ANIA_04073 | ANIA_04087 | ANIA_04163 | ANIA_04222 | ANIA_04452 | ANIA_04475 | ANIA_04522 | ANIA_04594 | ANIA_0474…	2.404308e-22	7.17686e-20	99 / 211	99 / 1985
GO:0006091	generation of precursor metabolites and energy	BP	ANIA_00357 | ANIA_00395 | ANIA_00747 | ANIA_01063 | ANIA_01094 | ANIA_01189 | ANIA_01534 | ANIA_02316 | ANIA_04064 | ANIA_04525 | ANIA_04859 | ANIA_04927 | ANIA_05457 | ANIA_05597 | ANIA_05629 | ANIA_05838 | ANIA_06077 | ANIA_06287 | ANIA_06631 | ANIA_06642 | ANIA_08118 | ANIA_08399 | ANIA_08941 | ANIA_00252 | ANIA_01523 | ANIA_01628 | ANIA_02306 | ANIA_02315 | ANIA_02414 | ANIA_03901 | ANIA_0438…	4.408938e-18	1.052854e-15	34 / 43	34 / 1985
GO:0030529	ribonucleoprotein complex	CC	ANIA_00142 | ANIA_00445 | ANIA_00465 | ANIA_00767 | ANIA_00776 | ANIA_00907 | ANIA_01095 | ANIA_01345 | ANIA_01964 | ANIA_02007 | ANIA_02734 | ANIA_03413 | ANIA_03823 | ANIA_04073 | ANIA_04087 | ANIA_04222 | ANIA_04452 | ANIA_04475 | ANIA_04777 | ANIA_04803 | ANIA_05222 | ANIA_05441 | ANIA_05719 | ANIA_05800 | ANIA_05960 | ANIA_05996 | ANIA_06181 | ANIA_07003 | ANIA_09097 | ANIA_00262 | ANIA_0043…	2.440598e-12	4.856791e-10	48 / 98	48 / 1985
GO:1902600	hydrogen ion transmembrane transport	BP	ANIA_00357 | ANIA_00747 | ANIA_01189 | ANIA_02288 | ANIA_02316 | ANIA_04525 | ANIA_04859 | ANIA_04927 | ANIA_05597 | ANIA_06642 | ANIA_07250 | ANIA_08118 | ANIA_08399 | ANIA_08941 | ANIA_01628 | ANIA_02306 | ANIA_04388 | ANIA_06255 | ANIA_08273 | ANIA_10585 | ANIA_11347	1.882927e-8	3.21174e-06	21 / 34	21 / 1985
GO:0006099	tricarboxylic acid cycle	BP	ANIA_02295 | ANIA_02332 | ANIA_02435 | ANIA_02436 | ANIA_05571 | ANIA_08707 | ANIA_08793 | ANIA_01003 | ANIA_02916 | ANIA_02999 | ANIA_03466 | ANIA_06499 | ANIA_06717	7.386932e-7	0.00011025	13 / 18	13 / 1985
GO:0008137	NADH dehydrogenase (ubiquinone) activity	MF	ANIA_01063 | ANIA_01094 | ANIA_03276 | ANIA_04288 | ANIA_05629 | ANIA_06077 | ANIA_09078 | ANIA_00630 | ANIA_01936 | ANIA_02260 | ANIA_02414 | ANIA_04297 | ANIA_10229 | ANIA_11377	2.85232e-06	0.000378408	14 / 22	14 / 1985
GO:0015986	ATP synthesis coupled proton transport	BP	ANIA_00943 | ANIA_01534 | ANIA_06287 | ANIA_06631 | ANIA_00252 | ANIA_01523 | ANIA_02315 | ANIA_11303 | ANIA_11444 | ANIA_11499	6.16228e-06	0.000682349	10 / 13	10 / 1985
GO:0022627	cytosolic small ribosomal subunit	CC	ANIA_00465 | ANIA_01964 | ANIA_03823 | ANIA_04087 | ANIA_04916 | ANIA_05979 | ANIA_06632	6.28629e-06	0.000682349	7 / 7	7 / 1985
GO:0008121	ubiquinol-cytochrome-c reductase activity	MF	ANIA_00357 | ANIA_00747 | ANIA_05597 | ANIA_02306 | ANIA_04388 | ANIA_08273	3.48446e-05	0.00330558	6 / 6	6 / 1985
GO:0015935	small ribosomal subunit	CC	ANIA_01345 | ANIA_03413 | ANIA_04087 | ANIA_04594 | ANIA_04803 | ANIA_05441 | ANIA_00843 | ANIA_05997	3.59904e-05	0.00330558	8 / 10	8 / 1985
GO:0097308	cellular response to farnesol	BP	ANIA_00240 | ANIA_00687 | ANIA_00747 | ANIA_00797 | ANIA_02435 | ANIA_04015 | ANIA_04163 | ANIA_04300 | ANIA_05564 | ANIA_05908 | ANIA_07208 | ANIA_07590 | ANIA_00179 | ANIA_02846 | ANIA_04667 | ANIA_08273 | ANIA_08863	5.76111e-05	0.00491341	17 / 36	17 / 1985
GO:0016125	sterol metabolic process	BP	ANIA_00579 | ANIA_02311 | ANIA_03869 | ANIA_04094 | ANIA_04414 | ANIA_06506 | ANIA_07146 | ANIA_08012 | ANIA_08283 | ANIA_09496 | ANIA_00451 | ANIA_04042 | ANIA_05585 | ANIA_06973	7.21048e-05	0.00573954	14 / 27	14 / 1985
GO:0015934	large ribosomal subunit	CC	ANIA_00570 | ANIA_00776 | ANIA_01095 | ANIA_01393 | ANIA_01122 | ANIA_04652 | ANIA_04202	0.000160614	0.0106532	7 / 9	7 / 1985
GO:0006730	one-carbon metabolic process	BP	ANIA_01222 | ANIA_03840 | ANIA_05883 | ANIA_08215 | ANIA_02998 | ANIA_03058 | ANIA_10745	0.000160614	0.0106532	7 / 9	7 / 1985
GO:0008017	microtubule binding	MF	ANIA_02128 | ANIA_03124 | ANIA_03721 | ANIA_06875 | ANIA_08251 | ANIA_10225 | ANIA_08286 | ANIA_04513 | ANIA_06863	0.000169523	0.0106532	9 / 14	9 / 1985
GO:0010914	positive regulation of sterigmatocystin biosynthetic process	BP	ANIA_04562 | ANIA_06654 | ANIA_06505 | ANIA_02742 | ANIA_06243 | ANIA_00807 | ANIA_03719 | ANIA_00081 | ANIA_01052	0.000169523	0.0106532	9 / 14	9 / 1985
GO:0003989	acetyl-CoA carboxylase activity	MF	ANIA_04690 | ANIA_05904 | ANIA_06126 | ANIA_09408 | ANIA_09407	0.000193044	0.0111907	5 / 5	5 / 1985
GO:0009055	electron carrier activity	MF	ANIA_00357 | ANIA_02332 | ANIA_04288 | ANIA_05998 | ANIA_06077 | ANIA_08793 | ANIA_09464 | ANIA_01936 | ANIA_02260 | ANIA_10278	0.000206165	0.0111907	10 / 17	10 / 1985
GO:0016651	oxidoreductase activity, acting on NAD(P)H	MF	ANIA_04288 | ANIA_05629 | ANIA_05971 | ANIA_02414 | ANIA_05703 | ANIA_10229	0.000206194	0.0111907	6 / 7	6 / 1985
GO:0006096	glycolytic process	BP	ANIA_02875 | ANIA_03059 | ANIA_04255 | ANIA_04462 | ANIA_04690 | ANIA_05162 | ANIA_05604 | ANIA_05908 | ANIA_08720	0.000682945	0.0347111	9 / 16	9 / 1985
GO:0004129	cytochrome-c oxidase activity	MF	ANIA_02316 | ANIA_04525 | ANIA_08118 | ANIA_06255 | ANIA_10585 | ANIA_11347	0.00069771	0.0347111	6 / 8	6 / 1985
GO:0005576	extracellular region	CC	ANIA_00240 | ANIA_00395 | ANIA_00567 | ANIA_00687 | ANIA_00759 | ANIA_00776 | ANIA_01058 | ANIA_01638 | ANIA_01689 | ANIA_02334 | ANIA_02387 | ANIA_02954 | ANIA_03712 | ANIA_04006 | ANIA_04015 | ANIA_04041 | ANIA_04064 | ANIA_04087 | ANIA_04187 | ANIA_04402 | ANIA_04575 | ANIA_05441 | ANIA_05534 | ANIA_05833 | ANIA_05904 | ANIA_05939 | ANIA_07193 | ANIA_07511 | ANIA_09130 | ANIA_09156 | ANIA_0938…	0.000870643	0.0415819	44 / 154	44 / 1985
GO:0000276	mitochondrial proton-transporting ATP synthase complex, coupling factor F(o)	CC	ANIA_00943 | ANIA_01534 | ANIA_06631 | ANIA_11303	0.00106896	0.0463377	4 / 4	4 / 1985
GO:0035999	tetrahydrofolate interconversion	BP	ANIA_05883 | ANIA_08215 | ANIA_03058 | ANIA_10745	0.00106896	0.0463377	4 / 4	4 / 1985
GO:0000166	nucleotide binding	MF	ANIA_00259 | ANIA_00228 | ANIA_00314 | ANIA_00428 | ANIA_00936 | ANIA_01189 | ANIA_01207 | ANIA_01222 | ANIA_01322 | ANIA_01394 | ANIA_01912 | ANIA_02927 | ANIA_03124 | ANIA_03422 | ANIA_03721 | ANIA_03869 | ANIA_03953 | ANIA_04038 | ANIA_04255 | ANIA_04258 | ANIA_04462 | ANIA_04690 | ANIA_04706 | ANIA_04743 | ANIA_04859 | ANIA_04865 | ANIA_05194 | ANIA_05406 | ANIA_05676 | ANIA_05728 | ANIA_0575…	0.00108665	0.0463377	99 / 411	99 / 1985
GO:0005743	mitochondrial inner membrane	CC	ANIA_01230 | ANIA_04064 | ANIA_05971 | ANIA_08118 | ANIA_04388 | ANIA_10568 | ANIA_10585 | ANIA_11347	0.00120226	0.04785	8 / 14	8 / 1985
GO:0046961	proton-transporting ATPase activity, rotational mechanism	MF	ANIA_01534 | ANIA_04927 | ANIA_06287 | ANIA_06631 | ANIA_00252 | ANIA_01523 | ANIA_02315 | ANIA_11499	0.00120226	0.04785	8 / 14	8 / 1985
KEGG
KEGG pathway ID	KEGG pathway name	KEGG main category	Gene ID(s)	Exact p-value	Adjusted p-value	# genes / category	# genes / input
3010	Ribosome	Genetic Information Processing	AN0142.2 | AN0262.2 | AN0433.2 | AN0445.2 | AN0465.2 | AN0570.2 | AN0776.2 | AN0843.2 | AN0907.2 | AN1013.2 | AN1095.2 | AN1122.2 | AN1166.2 | AN1228.2 | AN1345.2 | AN1393.2 | AN1964.2 | AN2057.2 | AN2275.2 | AN2734.2 | AN2980.2 | AN3172.2 | AN3413.2 | AN3706.2 | AN3823.2 | AN4016.2 | AN4060.2 | AN4073.2 | AN4087.2 | AN4202.2 | AN4222.2 | AN4452.2 | AN4475.2 | AN4494.2 | AN4522.2 | AN4594.2 | AN4…	2.529188e-24	2.655648e-22	72 / 90	72 / 1985
1100	Metabolic pathways	Metabolism	AN0049.2 | AN0067.2 | AN0121.2 | AN0179.2 | AN0240.2 | AN0252.2 | AN0259.2 | AN0357.2 | AN0451.2 | AN0554.2 | AN0567.2 | AN0579.2 | AN0670.2 | AN0687.2 | AN0688.2 | AN0701.2 | AN0787.2 | AN0797.2 | AN0802.2 | AN0893.2 | AN0896.2 | AN0912.2 | AN0943.2 | AN0947.2 | AN1003.2 | AN1063.2 | AN1135.2 | AN1176.2 | AN1193.2 | AN1194.2 | AN1198.2 | AN1222.2 | AN1226.2 | AN1246.2 | AN1342.2 | AN1357.2 | AN1…	4.773703e-12	2.506194e-10	260 / 669	260 / 1985
1200	Carbon metabolism	Metabolism	AN0240.2 | AN0567.2 | AN0688.2 | AN0701.2 | AN0896.2 | AN1003.2 | AN1193.2 | AN1198.2 | AN1246.2 | AN1342.2 | AN1409.2 | AN1918.2 | AN2295.2 | AN2332.2 | AN2334.2 | AN2440.2 | AN2875.2 | AN2916.2 | AN2999.2 | AN3058.2 | AN3059.2 | AN3466.2 | AN3591.2 | AN3641.2 | AN3954.2 | AN4255.2 | AN4462.2 | AN5162.2 | AN5525.2 | AN5571.2 | AN5604.2 | AN5626.2 | AN5634.2 | AN5746.2 | AN5883.2 | AN5907.2 | AN5…	2.8632e-11	1.00212e-9	58 / 94	58 / 1985
190	Oxidative phosphorylation	Metabolism	AN0252.2 | AN0357.2 | AN0896.2 | AN0943.2 | AN1063.2 | AN1523.2 | AN1534.2 | AN1624.2 | AN1722.2 | AN1915.2 | AN2306.2 | AN2315.2 | AN2316.2 | AN2332.2 | AN2414.2 | AN2916.2 | AN2968.2 | AN3922.2 | AN4288.2 | AN4297.2 | AN4388.2 | AN4525.2 | AN4718.2 | AN4859.2 | AN4927.2 | AN5597.2 | AN5629.2 | AN5971.2 | AN6077.2 | AN6255.2 | AN6287.2 | AN6557.2 | AN6631.2 | AN8049.2 | AN8118.2 | AN8273.2 | AN8…	5.860945e-11	1.538498e-9	39 / 54	39 / 1985
20	Citrate cycle (TCA cycle)	Metabolism	AN0896.2 | AN1003.2 | AN1193.2 | AN1918.2 | AN2295.2 | AN2332.2 | AN2435.2 | AN2436.2 | AN2916.2 | AN2999.2 | AN3466.2 | AN4462.2 | AN5162.2 | AN5525.2 | AN5571.2 | AN6499.2 | AN6650.2 | AN6708.2 | AN6717.2 | AN8275.2 | AN8707.2 | AN8793.2 | AN9403.2	4.816142e-10	1.01139e-8	23 / 26	23 / 1985
1110	Biosynthesis of secondary metabolites	Metabolism	AN0121.2 | AN0240.2 | AN0259.2 | AN0432.2 | AN0554.2 | AN0579.2 | AN0688.2 | AN0701.2 | AN0797.2 | AN0896.2 | AN0912.2 | AN1003.2 | AN1135.2 | AN1193.2 | AN1222.2 | AN1246.2 | AN1342.2 | AN1403.2 | AN1409.2 | AN1428.2 | AN1586.2 | AN1722.2 | AN1810.2 | AN1915.2 | AN1918.2 | AN1968.2 | AN2293.2 | AN2295.2 | AN2311.2 | AN2314.2 | AN2332.2 | AN2334.2 | AN2407.2 | AN2435.2 | AN2436.2 | AN2440.2 | AN2…	2.406496e-8	4.211368e-7	123 / 282	123 / 1985
10	Glycolysis / Gluconeogenesis	Metabolism	AN0554.2 | AN1246.2 | AN1689.2 | AN1918.2 | AN2334.2 | AN2867.2 | AN2875.2 | AN3059.2 | AN3184.2 | AN4255.2 | AN5162.2 | AN5604.2 | AN5626.2 | AN5746.2 | AN5908.2 | AN6708.2 | AN6900.2 | AN7459.2 | AN7632.2 | AN8041.2 | AN8689.2 | AN8720.2 | AN9403.2	6.17214e-05	0.00092582	23 / 38	23 / 1985
630	Glyoxylate and dicarboxylate metabolism	Metabolism	AN0701.2 | AN1342.2 | AN1409.2 | AN3058.2 | AN4159.2 | AN5525.2 | AN5634.2 | AN6499.2 | AN6525.2 | AN6650.2 | AN6653.2 | AN6654.2 | AN6717.2 | AN7108.2 | AN8275.2 | AN8637.2	0.000350264	0.00459721	16 / 25	16 / 1985
680	Methane metabolism	Metabolism	AN0567.2 | AN0701.2 | AN1342.2 | AN2334.2 | AN2875.2 | AN3058.2 | AN3059.2 | AN5604.2 | AN5626.2 | AN5746.2 | AN6525.2 | AN7632.2 | AN8720.2 | AN8782.2	0.000453135	0.00528658	14 / 21	14 / 1985
860	Porphyrin and chlorophyll metabolism	Metabolism	AN0121.2 | AN1403.2 | AN1722.2 | AN1915.2 | AN2733.2 | AN3920.2 | AN4415.2 | AN4774.2 | AN7361.2 | AN7752.2 | AN8224.2	0.000564813	0.00593054	11 / 15	11 / 1985
620	Pyruvate metabolism	Metabolism	AN0554.2 | AN1409.2 | AN1918.2 | AN3901.2 | AN4462.2 | AN4792.2 | AN5162.2 | AN5626.2 | AN6126.2 | AN6168.2 | AN6499.2 | AN6653.2 | AN6708.2 | AN6717.2 | AN6840.2 | AN8707.2 | AN9403.2	0.0026987	0.0257603	17 / 31	17 / 1985
ct vs cc	up-regulated genes	reference strain Cd treated vs. reference strain untreated
FunCat
FunCat ID	FunCat description	FunCat main category	Gene ID(s)	Exact p-value	Adjusted p-value	# genes / category	# genes / input
14.13.01.01	proteasomal degradation (ubiquitin/proteasomal pathway)	Protein fate (folding, modification, destination)	ANIA_00261 | ANIA_00295 | ANIA_00329 | ANIA_00482 | ANIA_00770 | ANIA_00810 | ANIA_01019 | ANIA_01209 | ANIA_01491 | ANIA_01539 | ANIA_01700 | ANIA_01757 | ANIA_01922 | ANIA_02073 | ANIA_02085 | ANIA_02129 | ANIA_02212 | ANIA_02213 | ANIA_02233 | ANIA_02246 | ANIA_02302 | ANIA_02416 | ANIA_02521 | ANIA_02904 | ANIA_02917 | ANIA_03019 | ANIA_03136 | ANIA_03493 | ANIA_03623 | ANIA_03646 | ANIA_0371…	1.950891e-15	7.841842e-13	76 / 159	76 / 1875
11.04.01	rRNA processing	Transcription	ANIA_00074 | ANIA_00092 | ANIA_00133 | ANIA_00204 | ANIA_00237 | ANIA_00421 | ANIA_00475 | ANIA_00583 | ANIA_00589 | ANIA_00637 | ANIA_00707 | ANIA_00757 | ANIA_00796 | ANIA_00944 | ANIA_01164 | ANIA_01175 | ANIA_01215 | ANIA_01260 | ANIA_01266 | ANIA_01319 | ANIA_01367 | ANIA_01517 | ANIA_01949 | ANIA_01956 | ANIA_01983 | ANIA_02077 | ANIA_02147 | ANIA_02292 | ANIA_03176 | ANIA_03313 | ANIA_0345…	2.993069e-15	7.841842e-13	83 / 182	83 / 1875
14.07.11	protein processing (proteolytic)	Protein fate (folding, modification, destination)	ANIA_00788 | ANIA_00871 | ANIA_01104 | ANIA_01209 | ANIA_01525 | ANIA_01700 | ANIA_01757 | ANIA_01922 | ANIA_01981 | ANIA_02085 | ANIA_02129 | ANIA_02213 | ANIA_02810 | ANIA_02904 | ANIA_02917 | ANIA_03019 | ANIA_03149 | ANIA_03493 | ANIA_03756 | ANIA_03932 | ANIA_04236 | ANIA_04449 | ANIA_04457 | ANIA_04492 | ANIA_04775 | ANIA_04783 | ANIA_04869 | ANIA_05121 | ANIA_05199 | ANIA_05784 | ANIA_0579…	1.132235e-10	1.977636e-8	48 / 98	48 / 1875
16.01	protein binding	Protein with binding function or cofactor requirement (structural or analytic)	ANIA_00065 | ANIA_00074 | ANIA_00075 | ANIA_00112 | ANIA_00127 | ANIA_00134 | ANIA_00135 | ANIA_00137 | ANIA_00192 | ANIA_00211 | ANIA_00214 | ANIA_00261 | ANIA_00290 | ANIA_00310 | ANIA_00321 | ANIA_00329 | ANIA_00349 | ANIA_00380 | ANIA_00409 | ANIA_00429 | ANIA_00482 | ANIA_00560 | ANIA_00573 | ANIA_00590 | ANIA_00632 | ANIA_00665 | ANIA_00699 | ANIA_00707 | ANIA_00725 | ANIA_00752 | ANIA_0077…	7.37231e-9	9.657726e-7	369 / 1448	369 / 1875
32.01	stress response	Cell rescue, defense and virulence	ANIA_00034 | ANIA_00075 | ANIA_00248 | ANIA_00349 | ANIA_00421 | ANIA_00573 | ANIA_00847 | ANIA_01209 | ANIA_01306 | ANIA_01517 | ANIA_01700 | ANIA_01731 | ANIA_01757 | ANIA_01851 | ANIA_01904 | ANIA_01922 | ANIA_02000 | ANIA_02062 | ANIA_02085 | ANIA_02129 | ANIA_02149 | ANIA_02213 | ANIA_02246 | ANIA_02432 | ANIA_02904 | ANIA_02917 | ANIA_02918 | ANIA_02943 | ANIA_02981 | ANIA_03019 | ANIA_0337…	2.923723e-8	3.06406e-06	92 / 270	92 / 1875
32.01.07	unfolded protein response (e.g. ER quality control)	Cell rescue, defense and virulence	ANIA_00349 | ANIA_00429 | ANIA_00847 | ANIA_01296 | ANIA_01851 | ANIA_01904 | ANIA_02062 | ANIA_02149 | ANIA_02246 | ANIA_02432 | ANIA_02472 | ANIA_02918 | ANIA_03070 | ANIA_03134 | ANIA_03463 | ANIA_03592 | ANIA_03758 | ANIA_04583 | ANIA_04616 | ANIA_04731 | ANIA_05438 | ANIA_05602 | ANIA_05713 | ANIA_06796 | ANIA_07143 | ANIA_07254 | ANIA_07321 | ANIA_08035 | ANIA_08253 | ANIA_08269 | ANIA_0912…	2.848781e-7	2.48794e-05	34 / 73	34 / 1875
16.03.03	RNA binding	Protein with binding function or cofactor requirement (structural or analytic)	ANIA_00057 | ANIA_00133 | ANIA_00161 | ANIA_00204 | ANIA_00211 | ANIA_00298 | ANIA_00310 | ANIA_00421 | ANIA_00475 | ANIA_00583 | ANIA_00632 | ANIA_00637 | ANIA_00707 | ANIA_00728 | ANIA_00753 | ANIA_00796 | ANIA_00944 | ANIA_01045 | ANIA_01164 | ANIA_01249 | ANIA_01266 | ANIA_01452 | ANIA_01468 | ANIA_01517 | ANIA_01711 | ANIA_01983 | ANIA_02147 | ANIA_02246 | ANIA_02420 | ANIA_02433 | ANIA_0273…	1.03459e-06	7.74466e-05	96 / 305	96 / 1875
14.01	protein folding and stabilization	Protein fate (folding, modification, destination)	ANIA_00075 | ANIA_00135 | ANIA_00248 | ANIA_00295 | ANIA_00349 | ANIA_00380 | ANIA_00590 | ANIA_00834 | ANIA_00847 | ANIA_00862 | ANIA_01205 | ANIA_01639 | ANIA_01851 | ANIA_01904 | ANIA_02062 | ANIA_02149 | ANIA_02432 | ANIA_02453 | ANIA_02918 | ANIA_03070 | ANIA_03098 | ANIA_03134 | ANIA_03375 | ANIA_03463 | ANIA_03592 | ANIA_04467 | ANIA_04583 | ANIA_04602 | ANIA_04616 | ANIA_04623 | ANIA_0543…	3.91458e-06	0.000256405	47 / 125	47 / 1875
11.04.03.01	splicing	Transcription	ANIA_00133 | ANIA_00161 | ANIA_00211 | ANIA_00298 | ANIA_00310 | ANIA_00380 | ANIA_00560 | ANIA_00583 | ANIA_00632 | ANIA_00637 | ANIA_00944 | ANIA_01208 | ANIA_01249 | ANIA_01259 | ANIA_01260 | ANIA_01266 | ANIA_01319 | ANIA_01468 | ANIA_01634 | ANIA_01956 | ANIA_02245 | ANIA_02420 | ANIA_02433 | ANIA_02457 | ANIA_02848 | ANIA_02893 | ANIA_03082 | ANIA_03427 | ANIA_04032 | ANIA_04232 | ANIA_0423…	1.15158e-05	0.000670473	66 / 201	66 / 1875
11.02.01	rRNA synthesis	Transcription	ANIA_00065 | ANIA_00074 | ANIA_00192 | ANIA_00321 | ANIA_00421 | ANIA_00589 | ANIA_00752 | ANIA_00944 | ANIA_01949 | ANIA_02415 | ANIA_02747 | ANIA_03176 | ANIA_03313 | ANIA_03745 | ANIA_03827 | ANIA_03944 | ANIA_04226 | ANIA_04346 | ANIA_04456 | ANIA_04928 | ANIA_04949 | ANIA_05623 | ANIA_06171 | ANIA_06558 | ANIA_07205 | ANIA_07997 | ANIA_08073 | ANIA_09102 | ANIA_09125 | ANIA_11224	1.63355e-05	0.000782043	30 / 71	30 / 1875
18.01.07	regulation by binding / dissociation	Regulation of metabolism and protein function	ANIA_00583 | ANIA_00816 | ANIA_00999 | ANIA_01209 | ANIA_01700 | ANIA_01922 | ANIA_02066 | ANIA_02129 | ANIA_02211 | ANIA_02213 | ANIA_02904 | ANIA_02917 | ANIA_03019 | ANIA_03159 | ANIA_03427 | ANIA_03716 | ANIA_04236 | ANIA_04304 | ANIA_04492 | ANIA_04585 | ANIA_04775 | ANIA_04783 | ANIA_04987 | ANIA_05121 | ANIA_06074 | ANIA_06165 | ANIA_06988 | ANIA_07019 | ANIA_07305 | ANIA_07436 | ANIA_0756…	1.64169e-05	0.000782043	39 / 102	39 / 1875
14.13.01	cytoplasmic and nuclear protein degradation	Protein fate (folding, modification, destination)	ANIA_00329 | ANIA_01209 | ANIA_01426 | ANIA_01539 | ANIA_01757 | ANIA_01879 | ANIA_01904 | ANIA_02000 | ANIA_02129 | ANIA_02149 | ANIA_02212 | ANIA_02213 | ANIA_02413 | ANIA_02416 | ANIA_02441 | ANIA_02904 | ANIA_02917 | ANIA_02918 | ANIA_03134 | ANIA_03464 | ANIA_03716 | ANIA_04236 | ANIA_04449 | ANIA_04457 | ANIA_04731 | ANIA_04869 | ANIA_05199 | ANIA_05351 | ANIA_05653 | ANIA_05872 | ANIA_0589…	1.97131e-05	0.000860806	46 / 128	46 / 1875
18.02.01	enzymatic activity regulation / enzyme regulator	Regulation of metabolism and protein function	ANIA_00770 | ANIA_01209 | ANIA_01211 | ANIA_01491 | ANIA_01539 | ANIA_01554 | ANIA_01700 | ANIA_01922 | ANIA_02073 | ANIA_02081 | ANIA_02129 | ANIA_02162 | ANIA_02211 | ANIA_02213 | ANIA_02233 | ANIA_02416 | ANIA_02441 | ANIA_02893 | ANIA_02904 | ANIA_02917 | ANIA_02969 | ANIA_03019 | ANIA_03445 | ANIA_03623 | ANIA_03716 | ANIA_04017 | ANIA_04236 | ANIA_04419 | ANIA_04430 | ANIA_04492 | ANIA_0477…	2.81173e-05	0.00113334	52 / 152	52 / 1875
32.01.11	nutrient starvation response	Cell rescue, defense and virulence	ANIA_00300 | ANIA_00380 | ANIA_00564 | ANIA_00948 | ANIA_01632 | ANIA_01685 | ANIA_02246 | ANIA_02516 | ANIA_02873 | ANIA_03669 | ANIA_04315 | ANIA_04419 | ANIA_04887 | ANIA_05601 | ANIA_05919 | ANIA_07252 | ANIA_07321 | ANIA_08340 | ANIA_08622 | ANIA_09165	3.55558e-05	0.0013308	20 / 41	20 / 1875
11.04.03	mRNA processing (splicing, 5'-, 3'-end processing)	Transcription	ANIA_00133 | ANIA_00211 | ANIA_00298 | ANIA_00310 | ANIA_00329 | ANIA_00380 | ANIA_00421 | ANIA_00583 | ANIA_00637 | ANIA_00707 | ANIA_01208 | ANIA_01249 | ANIA_01259 | ANIA_01260 | ANIA_01266 | ANIA_01296 | ANIA_01517 | ANIA_02416 | ANIA_02420 | ANIA_02433 | ANIA_02848 | ANIA_02893 | ANIA_03082 | ANIA_03427 | ANIA_03999 | ANIA_04412 | ANIA_04458 | ANIA_04665 | ANIA_04760 | ANIA_04874 | ANIA_0557…	5.07276e-05	0.00177209	47 / 136	47 / 1875
20.09.01	nuclear transport	Cellular transport, transport facilitation and transport routes	ANIA_00295 | ANIA_00505 | ANIA_00696 | ANIA_00707 | ANIA_00906 | ANIA_00946 | ANIA_01215 | ANIA_01379 | ANIA_01711 | ANIA_02086 | ANIA_02142 | ANIA_02439 | ANIA_02737 | ANIA_02893 | ANIA_03012 | ANIA_04053 | ANIA_04226 | ANIA_04293 | ANIA_04317 | ANIA_04412 | ANIA_04499 | ANIA_06006 | ANIA_06591 | ANIA_06681 | ANIA_06978 | ANIA_06980 | ANIA_08820 | ANIA_10002 | ANIA_10058 | ANIA_10112 | ANIA_10325	6.71283e-05	0.00219845	31 / 79	31 / 1875
12.04.01	translation initiation	Protein synthesis	ANIA_00167 | ANIA_00725 | ANIA_00944 | ANIA_00978 | ANIA_01080 | ANIA_01083 | ANIA_01270 | ANIA_01344 | ANIA_01519 | ANIA_02246 | ANIA_02992 | ANIA_03411 | ANIA_04290 | ANIA_04742 | ANIA_05121 | ANIA_05738 | ANIA_06067 | ANIA_06651 | ANIA_06864 | ANIA_07321 | ANIA_07540 | ANIA_08066 | ANIA_08191 | ANIA_10139 | ANIA_10459	0.000108016	0.00332944	25 / 60	25 / 1875
18.02.09	regulator of transcription factor	Regulation of metabolism and protein function	ANIA_00242 | ANIA_00583 | ANIA_00794 | ANIA_00816 | ANIA_01205 | ANIA_01208 | ANIA_01266 | ANIA_01468 | ANIA_01491 | ANIA_01539 | ANIA_02129 | ANIA_02233 | ANIA_02421 | ANIA_02521 | ANIA_03427 | ANIA_03623 | ANIA_03907 | ANIA_04236 | ANIA_04492 | ANIA_04499 | ANIA_04585 | ANIA_04783 | ANIA_05121 | ANIA_05798 | ANIA_06074 | ANIA_06165 | ANIA_07019 | ANIA_07305 | ANIA_08035 | ANIA_09013 | ANIA_0935…	0.000217044	0.00631839	32 / 87	32 / 1875
12.01	ribosome biogenesis	Protein synthesis	ANIA_00074 | ANIA_00204 | ANIA_00475 | ANIA_00583 | ANIA_00637 | ANIA_00757 | ANIA_00844 | ANIA_00946 | ANIA_01175 | ANIA_01200 | ANIA_01215 | ANIA_01319 | ANIA_01367 | ANIA_01711 | ANIA_02086 | ANIA_02263 | ANIA_02926 | ANIA_03313 | ANIA_03455 | ANIA_03458 | ANIA_03745 | ANIA_03827 | ANIA_04043 | ANIA_04226 | ANIA_04330 | ANIA_04346 | ANIA_04469 | ANIA_04471 | ANIA_04499 | ANIA_04617 | ANIA_0586…	0.00031255	0.0086198	54 / 173	54 / 1875
11.04.02	tRNA processing	Transcription	ANIA_00072 | ANIA_00583 | ANIA_00818 | ANIA_00956 | ANIA_01045 | ANIA_01296 | ANIA_01700 | ANIA_02508 | ANIA_02967 | ANIA_03170 | ANIA_06006 | ANIA_06165 | ANIA_06978 | ANIA_08066 | ANIA_08799 | ANIA_09406 | ANIA_10020 | ANIA_10125 | ANIA_10451 | ANIA_10567 | ANIA_11224	0.0003325	0.00871149	21 / 50	21 / 1875
14.07.07	modification by ubiquitin-related proteins	Protein fate (folding, modification, destination)	ANIA_00304 | ANIA_01019 | ANIA_01173 | ANIA_01491 | ANIA_01539 | ANIA_02129 | ANIA_02233 | ANIA_02302 | ANIA_02416 | ANIA_02441 | ANIA_03623 | ANIA_04492 | ANIA_04783 | ANIA_05121 | ANIA_05798 | ANIA_07019 | ANIA_07428 | ANIA_08002 | ANIA_10519	0.00041512	0.0103582	19 / 44	19 / 1875
11.02.02	tRNA synthesis	Transcription	ANIA_00072 | ANIA_00192 | ANIA_00321 | ANIA_00752 | ANIA_01045 | ANIA_02415 | ANIA_02508 | ANIA_02693 | ANIA_02747 | ANIA_03170 | ANIA_04499 | ANIA_04928 | ANIA_04949 | ANIA_05662 | ANIA_05738 | ANIA_06558 | ANIA_07997 | ANIA_09125 | ANIA_09157 | ANIA_09406	0.000519679	0.0123778	20 / 48	20 / 1875
14.07.05	modification by ubiquitination, deubiquitination	Protein fate (folding, modification, destination)	ANIA_00329 | ANIA_00482 | ANIA_00810 | ANIA_01019 | ANIA_02000 | ANIA_02073 | ANIA_02149 | ANIA_02162 | ANIA_02212 | ANIA_02246 | ANIA_02302 | ANIA_02304 | ANIA_02413 | ANIA_02416 | ANIA_02441 | ANIA_02521 | ANIA_03003 | ANIA_03136 | ANIA_03646 | ANIA_03999 | ANIA_04458 | ANIA_04469 | ANIA_04784 | ANIA_05177 | ANIA_05351 | ANIA_05713 | ANIA_06086 | ANIA_06354 | ANIA_06894 | ANIA_06978 | ANIA_0701…	0.000648203	0.0147677	42 / 130	42 / 1875
14.13	protein/peptide degradation	Protein fate (folding, modification, destination)	ANIA_00224 | ANIA_00329 | ANIA_00349 | ANIA_00573 | ANIA_00770 | ANIA_00788 | ANIA_00871 | ANIA_01019 | ANIA_01209 | ANIA_01426 | ANIA_01757 | ANIA_01875 | ANIA_01879 | ANIA_02082 | ANIA_02085 | ANIA_02194 | ANIA_02212 | ANIA_02213 | ANIA_02304 | ANIA_02366 | ANIA_02413 | ANIA_02416 | ANIA_02421 | ANIA_02503 | ANIA_02513 | ANIA_02810 | ANIA_03003 | ANIA_03098 | ANIA_03493 | ANIA_03932 | ANIA_0395…	0.000946048	0.0200567	61 / 209	61 / 1875
16.19.03	ATP binding	Protein with binding function or cofactor requirement (structural or analytic)	ANIA_00034 | ANIA_00046 | ANIA_00057 | ANIA_00133 | ANIA_00204 | ANIA_00272 | ANIA_00349 | ANIA_00482 | ANIA_00576 | ANIA_00583 | ANIA_00589 | ANIA_00637 | ANIA_00653 | ANIA_00699 | ANIA_00708 | ANIA_00771 | ANIA_00810 | ANIA_00847 | ANIA_00944 | ANIA_00948 | ANIA_01014 | ANIA_01019 | ANIA_01195 | ANIA_01211 | ANIA_01237 | ANIA_01266 | ANIA_01296 | ANIA_01326 | ANIA_01564 | ANIA_01632 | ANIA_0163…	0.000956906	0.0200567	148 / 587	148 / 1875
12.1	aminoacyl-tRNA-synthetases	Protein synthesis	ANIA_00046 | ANIA_00057 | ANIA_01913 | ANIA_02150 | ANIA_02246 | ANIA_03073 | ANIA_03824 | ANIA_03865 | ANIA_05662 | ANIA_05738 | ANIA_06368 | ANIA_07321 | ANIA_07479 | ANIA_09157 | ANIA_09419 | ANIA_10475 | ANIA_11125	0.00143595	0.0289398	17 / 41	17 / 1875
30.01.05	enzyme mediated signal transduction	Cellular communication / signal transduction mechanism	ANIA_00699 | ANIA_01491 | ANIA_01539 | ANIA_02129 | ANIA_02233 | ANIA_02943 | ANIA_03463 | ANIA_03623 | ANIA_04492 | ANIA_04783 | ANIA_04987 | ANIA_05121 | ANIA_05798 | ANIA_06391 | ANIA_06820 | ANIA_07321 | ANIA_09048 | ANIA_10325 | ANIA_10519	0.00198886	0.0385986	19 / 49	19 / 1875
GO
GO ID	GO name	GO namespace	Gene ID(s)	Exact p-value	Adjusted p-value	# genes / category	# genes / input
GO:0000502	proteasome complex	CC	ANIA_01209 | ANIA_01700 | ANIA_01757 | ANIA_01922 | ANIA_02085 | ANIA_02213 | ANIA_03756 | ANIA_03932 | ANIA_04449 | ANIA_04731 | ANIA_04775 | ANIA_05607 | ANIA_05784 | ANIA_05793 | ANIA_05872 | ANIA_06547 | ANIA_06726 | ANIA_07579 | ANIA_08253 | ANIA_02904 | ANIA_03019 | ANIA_04457 | ANIA_04492 | ANIA_04869 | ANIA_05774 | ANIA_08054 | ANIA_10020 | ANIA_10337 | ANIA_10519 | ANIA_10708	6.56826e-21	6.285824e-18	30 / 32	30 / 1875
GO:0051603	proteolysis involved in cellular protein catabolic process	BP	ANIA_01757 | ANIA_02085 | ANIA_03493 | ANIA_03756 | ANIA_03932 | ANIA_04449 | ANIA_05784 | ANIA_05793 | ANIA_05872 | ANIA_06547 | ANIA_06726 | ANIA_04457 | ANIA_04869 | ANIA_08054 | ANIA_10708	4.637918e-12	1.109622e-9	15 / 15	15 / 1875
GO:0004298	threonine-type endopeptidase activity	MF	ANIA_01757 | ANIA_02085 | ANIA_03493 | ANIA_03756 | ANIA_03932 | ANIA_04449 | ANIA_05784 | ANIA_05793 | ANIA_05872 | ANIA_06547 | ANIA_06726 | ANIA_04457 | ANIA_04869 | ANIA_08054 | ANIA_10708	4.637918e-12	1.109622e-9	15 / 15	15 / 1875
GO:0005839	proteasome core complex	CC	ANIA_01757 | ANIA_02085 | ANIA_03493 | ANIA_03756 | ANIA_03932 | ANIA_04449 | ANIA_05784 | ANIA_05793 | ANIA_05872 | ANIA_06547 | ANIA_06726 | ANIA_04457 | ANIA_04869 | ANIA_08054 | ANIA_10708	4.637918e-12	1.109622e-9	15 / 15	15 / 1875
GO:0004175	endopeptidase activity	MF	ANIA_01757 | ANIA_02085 | ANIA_03756 | ANIA_03932 | ANIA_05793 | ANIA_05872 | ANIA_06547 | ANIA_06726 | ANIA_04457 | ANIA_04869 | ANIA_10708	4.938646e-9	9.452568e-7	11 / 11	11 / 1875
GO:0005737	cytoplasm	CC	ANIA_00057 | ANIA_00167 | ANIA_01080 | ANIA_01167 | ANIA_01370 | ANIA_01757 | ANIA_01851 | ANIA_01913 | ANIA_02085 | ANIA_02150 | ANIA_02213 | ANIA_02389 | ANIA_02410 | ANIA_02432 | ANIA_02516 | ANIA_02917 | ANIA_03070 | ANIA_03134 | ANIA_03223 | ANIA_03411 | ANIA_03756 | ANIA_03824 | ANIA_03932 | ANIA_03999 | ANIA_04043 | ANIA_04236 | ANIA_04793 | ANIA_05199 | ANIA_05662 | ANIA_05713 | ANIA_0579…	4.115415e-8	6.56409e-06	65 / 193	65 / 1875
GO:0008233	peptidase activity	MF	ANIA_00224 | ANIA_00349 | ANIA_01525 | ANIA_01757 | ANIA_02085 | ANIA_02366 | ANIA_03149 | ANIA_03756 | ANIA_03932 | ANIA_03959 | ANIA_05199 | ANIA_05793 | ANIA_05872 | ANIA_06354 | ANIA_06547 | ANIA_06726 | ANIA_07201 | ANIA_07422 | ANIA_02810 | ANIA_04457 | ANIA_04869 | ANIA_09460 | ANIA_10351 | ANIA_10673 | ANIA_10708 | ANIA_11102 | ANIA_11231	7.731024e-7	0.000105694	27 / 60	27 / 1875
GO:0006508	proteolysis	BP	ANIA_00224 | ANIA_00349 | ANIA_00871 | ANIA_01104 | ANIA_01426 | ANIA_01525 | ANIA_01757 | ANIA_02085 | ANIA_02194 | ANIA_02366 | ANIA_03149 | ANIA_03407 | ANIA_03756 | ANIA_03882 | ANIA_03932 | ANIA_03959 | ANIA_05199 | ANIA_05432 | ANIA_05793 | ANIA_05872 | ANIA_06354 | ANIA_06448 | ANIA_06547 | ANIA_06726 | ANIA_07201 | ANIA_07231 | ANIA_07366 | ANIA_07422 | ANIA_07858 | ANIA_09003 | ANIA_0187…	9.661862e-7	0.00011558	43 / 119	43 / 1875
GO:0006457	protein folding	BP	ANIA_00349 | ANIA_00380 | ANIA_00862 | ANIA_01205 | ANIA_01851 | ANIA_02432 | ANIA_03070 | ANIA_03134 | ANIA_04602 | ANIA_05713 | ANIA_07436 | ANIA_08269 | ANIA_08605 | ANIA_00248 | ANIA_01904 | ANIA_02149 | ANIA_02918 | ANIA_03592	1.72269e-06	0.00018318	18 / 33	18 / 1875
GO:0005634	nucleus	CC	ANIA_00096 | ANIA_00134 | ANIA_00388 | ANIA_00507 | ANIA_00752 | ANIA_00902 | ANIA_00928 | ANIA_01045 | ANIA_01167 | ANIA_01232 | ANIA_01678 | ANIA_01690 | ANIA_01757 | ANIA_01824 | ANIA_01956 | ANIA_02077 | ANIA_02085 | ANIA_02136 | ANIA_02147 | ANIA_02180 | ANIA_02431 | ANIA_02434 | ANIA_02441 | ANIA_02615 | ANIA_02737 | ANIA_03012 | ANIA_03050 | ANIA_03075 | ANIA_03300 | ANIA_03356 | ANIA_0362…	4.96023e-06	0.000453723	146 / 592	146 / 1875
GO:0019773	proteasome core complex, alpha-subunit complex	CC	ANIA_01757 | ANIA_05793 | ANIA_05872 | ANIA_06547 | ANIA_06726 | ANIA_04869 | ANIA_08054	5.2152e-06	0.000453723	7 / 7	7 / 1875
GO:0005524	ATP binding	MF	ANIA_00034 | ANIA_00057 | ANIA_00133 | ANIA_00318 | ANIA_00349 | ANIA_00576 | ANIA_00637 | ANIA_00699 | ANIA_00771 | ANIA_00847 | ANIA_00948 | ANIA_01296 | ANIA_01538 | ANIA_01564 | ANIA_01851 | ANIA_01913 | ANIA_01956 | ANIA_02062 | ANIA_02150 | ANIA_02180 | ANIA_02210 | ANIA_02213 | ANIA_02246 | ANIA_02300 | ANIA_02373 | ANIA_02416 | ANIA_02432 | ANIA_02917 | ANIA_03001 | ANIA_03070 | ANIA_0309…	6.16532e-06	0.000491684	112 / 432	112 / 1875
GO:0051082	unfolded protein binding	MF	ANIA_00349 | ANIA_00862 | ANIA_01205 | ANIA_01851 | ANIA_03070 | ANIA_03134 | ANIA_04602 | ANIA_05713 | ANIA_08269 | ANIA_01904 | ANIA_02149 | ANIA_02918 | ANIA_03592	1.53756e-05	0.00113188	13 / 22	13 / 1875
GO:0008080	N-acetyltransferase activity	MF	ANIA_00247 | ANIA_00969 | ANIA_00987 | ANIA_01621 | ANIA_02161 | ANIA_05330 | ANIA_06411 | ANIA_07374 | ANIA_07944 | ANIA_08005 | ANIA_08373 | ANIA_08604 | ANIA_05053 | ANIA_05866 | ANIA_08706 | ANIA_10234 | ANIA_10478 | ANIA_11043	3.54098e-05	0.00242051	18 / 39	18 / 1875
GO:0006511	ubiquitin-dependent protein catabolic process	BP	ANIA_00329 | ANIA_01757 | ANIA_05793 | ANIA_05872 | ANIA_06354 | ANIA_06547 | ANIA_06726 | ANIA_07422 | ANIA_07579 | ANIA_08074 | ANIA_01019 | ANIA_04458 | ANIA_04869 | ANIA_10008 | ANIA_11102	8.09034e-05	0.00516164	15 / 31	15 / 1875
GO:0044267	cellular protein metabolic process	BP	ANIA_01851 | ANIA_03070 | ANIA_03134 | ANIA_05713 | ANIA_01904 | ANIA_02149 | ANIA_02918	0.000134564	0.00804863	7 / 9	7 / 1875
GO:0000166	nucleotide binding	MF	ANIA_00057 | ANIA_00133 | ANIA_00318 | ANIA_00349 | ANIA_00505 | ANIA_00637 | ANIA_00771 | ANIA_00847 | ANIA_00948 | ANIA_01045 | ANIA_01309 | ANIA_01851 | ANIA_01913 | ANIA_02062 | ANIA_02150 | ANIA_02180 | ANIA_02210 | ANIA_02213 | ANIA_02244 | ANIA_02246 | ANIA_02300 | ANIA_02917 | ANIA_03070 | ANIA_03072 | ANIA_03098 | ANIA_03117 | ANIA_03134 | ANIA_03223 | ANIA_03427 | ANIA_03608 | ANIA_0382…	0.000171623	0.00966138	101 / 411	101 / 1875
GO:0003723	RNA binding	MF	ANIA_00072 | ANIA_01045 | ANIA_01080 | ANIA_01319 | ANIA_02147 | ANIA_03411 | ANIA_04043 | ANIA_04581 | ANIA_04617 | ANIA_04760 | ANIA_06165 | ANIA_06171 | ANIA_06331 | ANIA_06587 | ANIA_06698 | ANIA_08073 | ANIA_08191 | ANIA_08491 | ANIA_09406 | ANIA_00757 | ANIA_03170 | ANIA_04431 | ANIA_05875 | ANIA_06681 | ANIA_10173 | ANIA_10239 | ANIA_10406 | ANIA_10936 | ANIA_11224 | ANIA_10451	0.000222663	0.0118383	30 / 90	30 / 1875
GO:0006200	obsolete ATP catabolic process	BP	ANIA_00133 | ANIA_00318 | ANIA_00637 | ANIA_00771 | ANIA_00948 | ANIA_01564 | ANIA_02210 | ANIA_02300 | ANIA_03608 | ANIA_04032 | ANIA_04315 | ANIA_06237 | ANIA_06585 | ANIA_07729 | ANIA_08150 | ANIA_08344 | ANIA_08489 | ANIA_01014 | ANIA_01237 | ANIA_04432 | ANIA_06085 | ANIA_06512 | ANIA_06651 | ANIA_07839 | ANIA_08813 | ANIA_10125 | ANIA_10367 | ANIA_10414 | ANIA_10949	0.000350522	0.0176552	29 / 88	29 / 1875
GO:0003743	translation initiation factor activity	MF	ANIA_00167 | ANIA_00794 | ANIA_00978 | ANIA_01080 | ANIA_01083 | ANIA_01538 | ANIA_02410 | ANIA_03411 | ANIA_06067 | ANIA_06864 | ANIA_08066 | ANIA_08191 | ANIA_02992 | ANIA_04742 | ANIA_10459 | ANIA_11056	0.000507618	0.0231329	16 / 39	16 / 1875
GO:0006413	translational initiation	BP	ANIA_00167 | ANIA_00794 | ANIA_00978 | ANIA_01080 | ANIA_01083 | ANIA_01538 | ANIA_02410 | ANIA_03411 | ANIA_06067 | ANIA_06864 | ANIA_08066 | ANIA_08191 | ANIA_02992 | ANIA_04742 | ANIA_10459 | ANIA_11056	0.000507618	0.0231329	16 / 39	16 / 1875
GO:0004300	enoyl-CoA hydratase activity	MF	ANIA_05646 | ANIA_06752 | ANIA_05916 | ANIA_07111	0.000960834	0.0417963	4 / 4	4 / 1875
KEGG
KEGG pathway ID	KEGG pathway name	KEGG main category	Gene ID(s)	Exact p-value	Adjusted p-value	# genes / category	# genes / input
3050	Proteasome	Genetic Information Processing	AN1700.2 | AN1757.2 | AN1922.2 | AN2085.2 | AN2213.2 | AN2904.2 | AN2917.2 | AN3019.2 | AN3493.2 | AN3716.2 | AN3756.2 | AN3932.2 | AN4236.2 | AN4449.2 | AN4457.2 | AN4492.2 | AN4731.2 | AN4775.2 | AN4869.2 | AN5121.2 | AN5607.2 | AN5784.2 | AN5793.2 | AN5872.2 | AN6547.2 | AN6726.2 | AN6988.2 | AN7579.2 | AN8054.2	5.288522e-17	5.182752e-15	29 / 31	29 / 1875
4141	Protein processing in endoplasmic reticulum	Genetic Information Processing	AN0075.2 | AN0248.2 | AN0261.2 | AN0295.2 | AN0329.2 | AN0810.2 | AN0834.2 | AN0847.2 | AN1019.2 | AN1461.2 | AN2062.2 | AN2246.2 | AN2302.2 | AN2304.2 | AN3080.2 | AN3463.2 | AN3592.2 | AN3720.2 | AN4031.2 | AN4317.2 | AN4589.2 | AN4623.2 | AN5351.2 | AN6257.2 | AN6269.2 | AN6307.2 | AN6606.2 | AN7254.2 | AN7321.2 | AN7338.2 | AN7436.2 | AN7472.2 | AN8269.2	1.030945e-7	5.05163e-06	33 / 61	33 / 1875
3008	Ribosome biogenesis in eukaryotes	Genetic Information Processing	AN0247.2 | AN0475.2 | AN0707.2 | AN1215.2 | AN1319.2 | AN1711.2 | AN1983.2 | AN2263.2 | AN2737.2 | AN3455.2 | AN3794.2 | AN3864.2 | AN4330.2 | AN4460.2 | AN4631.2 | AN5010.2 | AN5455.2 | AN5865.2 | AN6171.2 | AN6334.2 | AN6363.2 | AN7458.2 | AN7566.2 | AN8253.2	0.000746336	0.0243803	24 / 56	24 / 1875

## Sheet: Sheet 2
Supplementary Table S4 Significantly enriched FunCat, GO and KEGG pathway terms.
Sheet 2 - DatfA mutant Cd treated vs. DatfA mutant untreated
mt vs mc	down-regulated genes	DatfA mutant Cd treated vs. DatfA mutant untreated
FunCat
FunCat ID	FunCat description	FunCat main category	Gene ID(s)	Exact p-value	Adjusted p-value	# genes / category	# genes / input
12.01.01	ribosomal proteins	Protein synthesis	ANIA_00116 | ANIA_00123 | ANIA_00142 | ANIA_00204 | ANIA_00262 | ANIA_00278 | ANIA_00433 | ANIA_00445 | ANIA_00465 | ANIA_00470 | ANIA_00570 | ANIA_00583 | ANIA_00647 | ANIA_00745 | ANIA_00776 | ANIA_00843 | ANIA_00907 | ANIA_00997 | ANIA_01013 | ANIA_01095 | ANIA_01122 | ANIA_01166 | ANIA_01200 | ANIA_01228 | ANIA_01256 | ANIA_01345 | ANIA_01348 | ANIA_01750 | ANIA_01770 | ANIA_01954 | ANIA_0196…	1.449033e-62	7.85376e-60	146 / 165	146 / 2514
12.01	ribosome biogenesis	Protein synthesis	ANIA_00074 | ANIA_00116 | ANIA_00124 | ANIA_00142 | ANIA_00204 | ANIA_00262 | ANIA_00445 | ANIA_00465 | ANIA_00570 | ANIA_00583 | ANIA_00641 | ANIA_00647 | ANIA_00695 | ANIA_00757 | ANIA_00776 | ANIA_00843 | ANIA_00844 | ANIA_00889 | ANIA_00907 | ANIA_01013 | ANIA_01122 | ANIA_01175 | ANIA_01200 | ANIA_01215 | ANIA_01228 | ANIA_01319 | ANIA_01345 | ANIA_01348 | ANIA_01366 | ANIA_01367 | ANIA_0139…	2.235134e-54	6.057214e-52	144 / 173	144 / 2514
12.04	translation	Protein synthesis	ANIA_00116 | ANIA_00142 | ANIA_00262 | ANIA_00278 | ANIA_00359 | ANIA_00445 | ANIA_00465 | ANIA_00570 | ANIA_00776 | ANIA_00843 | ANIA_00936 | ANIA_01013 | ANIA_01084 | ANIA_01095 | ANIA_01122 | ANIA_01166 | ANIA_01228 | ANIA_01270 | ANIA_01345 | ANIA_01408 | ANIA_01710 | ANIA_01964 | ANIA_02057 | ANIA_02080 | ANIA_02275 | ANIA_02301 | ANIA_02734 | ANIA_02775 | ANIA_02900 | ANIA_02932 | ANIA_0298…	1.771677e-30	3.20083e-28	120 / 175	120 / 2514
11.04.01	rRNA processing	Transcription	ANIA_00074 | ANIA_00092 | ANIA_00124 | ANIA_00189 | ANIA_00204 | ANIA_00305 | ANIA_00327 | ANIA_00410 | ANIA_00583 | ANIA_00647 | ANIA_00695 | ANIA_00745 | ANIA_00757 | ANIA_00894 | ANIA_01158 | ANIA_01164 | ANIA_01175 | ANIA_01215 | ANIA_01255 | ANIA_01319 | ANIA_01367 | ANIA_01434 | ANIA_01474 | ANIA_01533 | ANIA_01750 | ANIA_01751 | ANIA_01949 | ANIA_01957 | ANIA_01983 | ANIA_02079 | ANIA_0214…	7.816477e-22	8.503548e-20	111 / 182	111 / 2514
16.03.03	RNA binding	Protein with binding function or cofactor requirement (structural or analytic)	ANIA_00059 | ANIA_00109 | ANIA_00189 | ANIA_00204 | ANIA_00211 | ANIA_00262 | ANIA_00289 | ANIA_00305 | ANIA_00310 | ANIA_00359 | ANIA_00406 | ANIA_00445 | ANIA_00570 | ANIA_00583 | ANIA_00647 | ANIA_00695 | ANIA_00745 | ANIA_00767 | ANIA_00776 | ANIA_00990 | ANIA_01013 | ANIA_01055 | ANIA_01158 | ANIA_01164 | ANIA_01166 | ANIA_01413 | ANIA_01434 | ANIA_01452 | ANIA_01533 | ANIA_01635 | ANIA_0175…	7.844601e-22	8.503548e-20	161 / 305	161 / 2514
16.01	protein binding	Protein with binding function or cofactor requirement (structural or analytic)	ANIA_00059 | ANIA_00067 | ANIA_00074 | ANIA_00081 | ANIA_00084 | ANIA_00106 | ANIA_00109 | ANIA_00116 | ANIA_00118 | ANIA_00142 | ANIA_00163 | ANIA_00182 | ANIA_00190 | ANIA_00211 | ANIA_00228 | ANIA_00260 | ANIA_00262 | ANIA_00278 | ANIA_00292 | ANIA_00310 | ANIA_00316 | ANIA_00381 | ANIA_00410 | ANIA_00433 | ANIA_00445 | ANIA_00449 | ANIA_00463 | ANIA_00465 | ANIA_00570 | ANIA_00641 | ANIA_0064…	6.63226e-16	5.991141e-14	519 / 1448	519 / 2514
02.13.03	aerobic respiration	Energy	ANIA_00252 | ANIA_00357 | ANIA_00432 | ANIA_00747 | ANIA_00896 | ANIA_01063 | ANIA_01094 | ANIA_01444 | ANIA_01469 | ANIA_01523 | ANIA_01624 | ANIA_01722 | ANIA_01915 | ANIA_01954 | ANIA_02260 | ANIA_02306 | ANIA_02315 | ANIA_02316 | ANIA_02332 | ANIA_02414 | ANIA_02900 | ANIA_02916 | ANIA_03011 | ANIA_04064 | ANIA_04288 | ANIA_04297 | ANIA_04388 | ANIA_04402 | ANIA_04464 | ANIA_04525 | ANIA_0475…	6.623937e-14	5.12882e-12	60 / 93	60 / 2514
10.01.03	DNA synthesis and replication	Cell cycle and DNA processing	ANIA_00067 | ANIA_00170 | ANIA_00228 | ANIA_00260 | ANIA_00327 | ANIA_00984 | ANIA_01207 | ANIA_01560 | ANIA_01750 | ANIA_02285 | ANIA_02491 | ANIA_02751 | ANIA_02764 | ANIA_02969 | ANIA_03033 | ANIA_03035 | ANIA_03067 | ANIA_03154 | ANIA_03785 | ANIA_03940 | ANIA_03944 | ANIA_04182 | ANIA_04233 | ANIA_04380 | ANIA_04903 | ANIA_05057 | ANIA_05102 | ANIA_05114 | ANIA_05188 | ANIA_05196 | ANIA_0540…	1.208612e-12	8.188347e-11	73 / 128	73 / 2514
42.16	mitochondrion	Biogenesis of cellular components	ANIA_00116 | ANIA_00123 | ANIA_00142 | ANIA_00470 | ANIA_00554 | ANIA_00559 | ANIA_00726 | ANIA_00821 | ANIA_00894 | ANIA_00997 | ANIA_01094 | ANIA_01095 | ANIA_01348 | ANIA_01770 | ANIA_01876 | ANIA_01954 | ANIA_01970 | ANIA_02057 | ANIA_02261 | ANIA_02268 | ANIA_02313 | ANIA_02900 | ANIA_02916 | ANIA_02939 | ANIA_03173 | ANIA_03461 | ANIA_03649 | ANIA_03744 | ANIA_03829 | ANIA_04054 | ANIA_0425…	1.76587e-12	1.063446e-10	84 / 156	84 / 2514
16.19	nucleotide/nucleoside/nucleobase binding	Protein with binding function or cofactor requirement (structural or analytic)	ANIA_00059 | ANIA_00089 | ANIA_00106 | ANIA_00109 | ANIA_00124 | ANIA_00182 | ANIA_00316 | ANIA_00359 | ANIA_00404 | ANIA_00449 | ANIA_00474 | ANIA_00562 | ANIA_00583 | ANIA_00692 | ANIA_00893 | ANIA_00936 | ANIA_00988 | ANIA_01024 | ANIA_01194 | ANIA_01215 | ANIA_01222 | ANIA_01255 | ANIA_01366 | ANIA_01394 | ANIA_01408 | ANIA_01452 | ANIA_01485 | ANIA_01560 | ANIA_01666 | ANIA_01710 | ANIA_0175…	1.941589e-10	1.052341e-8	158 / 375	158 / 2514
02.11.05	accessory proteins of electron transport and membrane-associated energy conservation	Energy	ANIA_00357 | ANIA_00747 | ANIA_01063 | ANIA_01366 | ANIA_01722 | ANIA_02260 | ANIA_02306 | ANIA_02332 | ANIA_02414 | ANIA_02916 | ANIA_04288 | ANIA_04297 | ANIA_04388 | ANIA_04977 | ANIA_05629 | ANIA_05703 | ANIA_06077 | ANIA_06255 | ANIA_06557 | ANIA_06699 | ANIA_06976 | ANIA_07450 | ANIA_08049 | ANIA_08118 | ANIA_08130 | ANIA_08273 | ANIA_08763 | ANIA_08793 | ANIA_10229 | ANIA_10278 | ANIA_1044…	4.889156e-10	2.40902e-8	32 / 44	32 / 2514
2.11	electron transport and membrane-associated energy conservation	Energy	ANIA_00252 | ANIA_00357 | ANIA_00432 | ANIA_00747 | ANIA_00876 | ANIA_00896 | ANIA_00943 | ANIA_01063 | ANIA_01094 | ANIA_01444 | ANIA_01523 | ANIA_01534 | ANIA_01543 | ANIA_01624 | ANIA_01699 | ANIA_02306 | ANIA_02315 | ANIA_02316 | ANIA_02332 | ANIA_02414 | ANIA_02682 | ANIA_02762 | ANIA_02916 | ANIA_04054 | ANIA_04288 | ANIA_04297 | ANIA_04300 | ANIA_04388 | ANIA_04525 | ANIA_04859 | ANIA_0562…	2.862158e-9	1.292741e-7	61 / 114	61 / 2514
11.02.01	rRNA synthesis	Transcription	ANIA_00074 | ANIA_00647 | ANIA_00695 | ANIA_00745 | ANIA_00809 | ANIA_00894 | ANIA_00908 | ANIA_01272 | ANIA_01447 | ANIA_01474 | ANIA_01485 | ANIA_01929 | ANIA_01949 | ANIA_02283 | ANIA_02415 | ANIA_02747 | ANIA_03167 | ANIA_03176 | ANIA_03313 | ANIA_03745 | ANIA_03827 | ANIA_03933 | ANIA_03944 | ANIA_04226 | ANIA_04346 | ANIA_04618 | ANIA_04865 | ANIA_06171 | ANIA_06244 | ANIA_06252 | ANIA_0655…	4.477432e-9	1.866745e-7	43 / 71	43 / 2514
16.21.08	Fe/S binding	Protein with binding function or cofactor requirement (structural or analytic)	ANIA_00747 | ANIA_00896 | ANIA_01007 | ANIA_01063 | ANIA_02306 | ANIA_02332 | ANIA_02414 | ANIA_02916 | ANIA_03894 | ANIA_04288 | ANIA_04297 | ANIA_04388 | ANIA_04977 | ANIA_05111 | ANIA_05525 | ANIA_05629 | ANIA_05703 | ANIA_06077 | ANIA_06557 | ANIA_07752 | ANIA_08049 | ANIA_08273 | ANIA_08763 | ANIA_08793 | ANIA_09093 | ANIA_09103 | ANIA_10229 | ANIA_10440	9.849274e-9	3.813076e-7	28 / 39	28 / 2514
11.06.01	rRNA modification	Transcription	ANIA_00092 | ANIA_00647 | ANIA_00695 | ANIA_00745 | ANIA_01751 | ANIA_01957 | ANIA_03167 | ANIA_03313 | ANIA_04226 | ANIA_04298 | ANIA_05340 | ANIA_06171 | ANIA_08254 | ANIA_08834 | ANIA_08851 | ANIA_10352 | ANIA_10712	2.572881e-8	9.296677e-7	17 / 19	17 / 2514
16.03.01	DNA binding	Protein with binding function or cofactor requirement (structural or analytic)	ANIA_00044 | ANIA_00124 | ANIA_00153 | ANIA_00176 | ANIA_00228 | ANIA_00260 | ANIA_00327 | ANIA_00719 | ANIA_00733 | ANIA_00734 | ANIA_00782 | ANIA_00809 | ANIA_00937 | ANIA_00984 | ANIA_01024 | ANIA_01134 | ANIA_01200 | ANIA_01207 | ANIA_01226 | ANIA_01255 | ANIA_01265 | ANIA_01413 | ANIA_01447 | ANIA_01708 | ANIA_01924 | ANIA_01927 | ANIA_01929 | ANIA_01971 | ANIA_02007 | ANIA_02102 | ANIA_0214…	2.864613e-8	9.703878e-7	167 / 425	167 / 2514
10.01.09.05	DNA conformation modification (e.g. chromatin)	Cell cycle and DNA processing	ANIA_00044 | ANIA_00083 | ANIA_00124 | ANIA_00153 | ANIA_00176 | ANIA_00204 | ANIA_00292 | ANIA_00310 | ANIA_00327 | ANIA_00410 | ANIA_00583 | ANIA_00719 | ANIA_00733 | ANIA_00894 | ANIA_01024 | ANIA_01060 | ANIA_01164 | ANIA_01200 | ANIA_01207 | ANIA_01226 | ANIA_01255 | ANIA_01265 | ANIA_01286 | ANIA_01546 | ANIA_01929 | ANIA_01949 | ANIA_01971 | ANIA_01984 | ANIA_02054 | ANIA_02102 | ANIA_0214…	4.93314e-8	1.55049e-06	111 / 260	111 / 2514
20.09.04	mitochondrial transport	Cellular transport, transport facilitation and transport routes	ANIA_00252 | ANIA_00346 | ANIA_00559 | ANIA_00716 | ANIA_00870 | ANIA_00896 | ANIA_01105 | ANIA_01523 | ANIA_01534 | ANIA_01795 | ANIA_01892 | ANIA_02173 | ANIA_02315 | ANIA_02646 | ANIA_02939 | ANIA_03461 | ANIA_03663 | ANIA_03690 | ANIA_03876 | ANIA_04064 | ANIA_04250 | ANIA_04387 | ANIA_04402 | ANIA_04490 | ANIA_04559 | ANIA_04894 | ANIA_05132 | ANIA_05356 | ANIA_05528 | ANIA_05693 | ANIA_0580…	5.149232e-8	1.55049e-06	58 / 113	58 / 2514
10.03.01	mitotic cell cycle and cell cycle control	Cell cycle and DNA processing	ANIA_00083 | ANIA_00084 | ANIA_00106 | ANIA_00170 | ANIA_00182 | ANIA_00228 | ANIA_00305 | ANIA_00359 | ANIA_00414 | ANIA_00676 | ANIA_00726 | ANIA_00814 | ANIA_00844 | ANIA_00862 | ANIA_00905 | ANIA_00911 | ANIA_01096 | ANIA_01158 | ANIA_01182 | ANIA_01215 | ANIA_01328 | ANIA_01366 | ANIA_01394 | ANIA_01485 | ANIA_01560 | ANIA_01666 | ANIA_01779 | ANIA_02054 | ANIA_02068 | ANIA_02080 | ANIA_0212…	9.764787e-8	2.67292e-06	131 / 322	131 / 2514
16.19.05	GTP binding	Protein with binding function or cofactor requirement (structural or analytic)	ANIA_00081 | ANIA_00089 | ANIA_00182 | ANIA_00316 | ANIA_00463 | ANIA_00651 | ANIA_00676 | ANIA_00692 | ANIA_00889 | ANIA_00893 | ANIA_01084 | ANIA_01182 | ANIA_01215 | ANIA_01322 | ANIA_01394 | ANIA_01408 | ANIA_01666 | ANIA_01912 | ANIA_02080 | ANIA_02223 | ANIA_02295 | ANIA_02687 | ANIA_03171 | ANIA_03598 | ANIA_03832 | ANIA_03934 | ANIA_04038 | ANIA_04080 | ANIA_04218 | ANIA_04470 | ANIA_0466…	9.863169e-8	2.67292e-06	57 / 112	57 / 2514
11.02.03	mRNA synthesis	Transcription	ANIA_00204 | ANIA_00327 | ANIA_00745 | ANIA_00809 | ANIA_00990 | ANIA_01256 | ANIA_01319 | ANIA_01408 | ANIA_01460 | ANIA_01495 | ANIA_01709 | ANIA_01949 | ANIA_02007 | ANIA_02105 | ANIA_02226 | ANIA_02296 | ANIA_02457 | ANIA_02747 | ANIA_02907 | ANIA_02911 | ANIA_03176 | ANIA_04523 | ANIA_04546 | ANIA_04723 | ANIA_04873 | ANIA_06085 | ANIA_06252 | ANIA_06374 | ANIA_06507 | ANIA_06522 | ANIA_0652…	2.393013e-7	6.17625e-06	55 / 109	55 / 2514
42.10.03	organization of chromosome structure	Biogenesis of cellular components	ANIA_00044 | ANIA_00124 | ANIA_00176 | ANIA_00292 | ANIA_00583 | ANIA_00668 | ANIA_00719 | ANIA_00733 | ANIA_00734 | ANIA_01024 | ANIA_01060 | ANIA_01164 | ANIA_01200 | ANIA_01255 | ANIA_01265 | ANIA_01286 | ANIA_01660 | ANIA_01929 | ANIA_01984 | ANIA_02054 | ANIA_02143 | ANIA_02147 | ANIA_02256 | ANIA_02278 | ANIA_02296 | ANIA_02490 | ANIA_02689 | ANIA_02850 | ANIA_02885 | ANIA_02911 | ANIA_0297…	3.731316e-7	9.1926e-06	102 / 242	102 / 2514
2.1	tricarboxylic-acid pathway (citrate cycle, Krebs cycle, TCA cycle)	Energy	ANIA_00896 | ANIA_01003 | ANIA_01103 | ANIA_01193 | ANIA_01543 | ANIA_01726 | ANIA_01775 | ANIA_02295 | ANIA_02332 | ANIA_02436 | ANIA_02916 | ANIA_02999 | ANIA_03466 | ANIA_03894 | ANIA_04376 | ANIA_05162 | ANIA_05206 | ANIA_05525 | ANIA_05571 | ANIA_05626 | ANIA_05790 | ANIA_05828 | ANIA_06168 | ANIA_06499 | ANIA_06521 | ANIA_06650 | ANIA_06708 | ANIA_06717 | ANIA_08275 | ANIA_08707 | ANIA_0879…	8.706561e-7	2.05172e-05	32 / 54	32 / 2514
12.04.01	translation initiation	Protein synthesis	ANIA_00359 | ANIA_01256 | ANIA_01270 | ANIA_02743 | ANIA_02775 | ANIA_02907 | ANIA_02932 | ANIA_02997 | ANIA_03055 | ANIA_03156 | ANIA_03411 | ANIA_04000 | ANIA_04015 | ANIA_04038 | ANIA_04470 | ANIA_04908 | ANIA_05954 | ANIA_06060 | ANIA_06700 | ANIA_06707 | ANIA_07105 | ANIA_07350 | ANIA_07540 | ANIA_08016 | ANIA_08066 | ANIA_08191 | ANIA_08712 | ANIA_10182 | ANIA_10535 | ANIA_10557 | ANIA_1073…	1.88489e-05	0.000425672	32 / 60	32 / 2514
10.01.03.03	ori recognition and priming complex formation	Cell cycle and DNA processing	ANIA_00228 | ANIA_00260 | ANIA_01207 | ANIA_01779 | ANIA_02491 | ANIA_03033 | ANIA_05676 | ANIA_05992 | ANIA_06070 | ANIA_06896 | ANIA_07260 | ANIA_07723 | ANIA_07994 | ANIA_10497 | ANIA_10755 | ANIA_10855	3.09633e-05	0.000671285	16 / 23	16 / 2514
10.03.01.01.09	G2/M transition of mitotic cell cycle	Cell cycle and DNA processing	ANIA_01272 | ANIA_01485 | ANIA_02137 | ANIA_02143 | ANIA_02969 | ANIA_03448 | ANIA_03648 | ANIA_03795 | ANIA_03910 | ANIA_03941 | ANIA_04182 | ANIA_04399 | ANIA_05617 | ANIA_06217 | ANIA_06300 | ANIA_06364 | ANIA_06517 | ANIA_06694 | ANIA_07296 | ANIA_07465 | ANIA_07748 | ANIA_08038 | ANIA_08064 | ANIA_10546 | ANIA_10635	3.78328e-05	0.000779646	25 / 44	25 / 2514
10.03.05.01	spindle pole body/centrosome and microtubule cycle	Cell cycle and DNA processing	ANIA_00084 | ANIA_00118 | ANIA_00316 | ANIA_00676 | ANIA_01333 | ANIA_02128 | ANIA_02847 | ANIA_02927 | ANIA_03363 | ANIA_03648 | ANIA_04460 | ANIA_04513 | ANIA_05196 | ANIA_05521 | ANIA_05618 | ANIA_05815 | ANIA_06523 | ANIA_06542 | ANIA_07009 | ANIA_07540 | ANIA_07570 | ANIA_08286 | ANIA_08783 | ANIA_08858 | ANIA_09424 | ANIA_10017 | ANIA_10627	3.92513e-05	0.000779646	27 / 49	27 / 2514
16.03	nucleic acid binding	Protein with binding function or cofactor requirement (structural or analytic)	ANIA_00059 | ANIA_00109 | ANIA_00182 | ANIA_00204 | ANIA_00359 | ANIA_00583 | ANIA_00782 | ANIA_00894 | ANIA_01024 | ANIA_01060 | ANIA_01255 | ANIA_01265 | ANIA_01413 | ANIA_01452 | ANIA_01710 | ANIA_01750 | ANIA_01949 | ANIA_02068 | ANIA_02185 | ANIA_02285 | ANIA_02775 | ANIA_02911 | ANIA_02932 | ANIA_02973 | ANIA_02989 | ANIA_03176 | ANIA_03427 | ANIA_03739 | ANIA_04233 | ANIA_04412 | ANIA_0454…	4.04763e-05	0.000779646	70 / 168	70 / 2514
10.01.02	DNA topology	Cell cycle and DNA processing	ANIA_00044 | ANIA_00228 | ANIA_00327 | ANIA_00583 | ANIA_01024 | ANIA_01255 | ANIA_01366 | ANIA_01750 | ANIA_01971 | ANIA_02256 | ANIA_02278 | ANIA_02285 | ANIA_02491 | ANIA_02751 | ANIA_02885 | ANIA_02932 | ANIA_02973 | ANIA_04233 | ANIA_04412 | ANIA_04472 | ANIA_04903 | ANIA_05406 | ANIA_05617 | ANIA_05931 | ANIA_05992 | ANIA_06070 | ANIA_06374 | ANIA_06585 | ANIA_06707 | ANIA_06895 | ANIA_0700…	4.17154e-05	0.000779646	40 / 83	40 / 2514
12.04.02	translation elongation	Protein synthesis	ANIA_01084 | ANIA_01408 | ANIA_02223 | ANIA_02734 | ANIA_02759 | ANIA_03832 | ANIA_04218 | ANIA_04308 | ANIA_05719 | ANIA_05996 | ANIA_06302 | ANIA_06330 | ANIA_06563 | ANIA_06700 | ANIA_08256 | ANIA_10315 | ANIA_10734	5.91786e-05	0.00106916	17 / 26	17 / 2514
10.03.01.01.11	M phase	Cell cycle and DNA processing	ANIA_00118 | ANIA_00814 | ANIA_00911 | ANIA_01024 | ANIA_01560 | ANIA_02128 | ANIA_02511 | ANIA_03363 | ANIA_03827 | ANIA_03941 | ANIA_03946 | ANIA_04265 | ANIA_04399 | ANIA_04460 | ANIA_04597 | ANIA_04706 | ANIA_05618 | ANIA_05676 | ANIA_05815 | ANIA_05899 | ANIA_06138 | ANIA_06340 | ANIA_06341 | ANIA_06364 | ANIA_06875 | ANIA_06906 | ANIA_07465 | ANIA_07726 | ANIA_07748 | ANIA_08286 | ANIA_0878…	7.80478e-05	0.00136458	36 / 74	36 / 2514
16.07	structural protein binding	Protein with binding function or cofactor requirement (structural or analytic)	ANIA_00316 | ANIA_00676 | ANIA_00848 | ANIA_00943 | ANIA_01064 | ANIA_01182 | ANIA_01534 | ANIA_01953 | ANIA_02487 | ANIA_02734 | ANIA_03029 | ANIA_03815 | ANIA_04706 | ANIA_04894 | ANIA_05007 | ANIA_05627 | ANIA_05778 | ANIA_06287 | ANIA_06523 | ANIA_06542 | ANIA_06631 | ANIA_06738 | ANIA_06838 | ANIA_07009 | ANIA_07296 | ANIA_07441 | ANIA_07570 | ANIA_08065 | ANIA_08496 | ANIA_10112 | ANIA_10627	8.61822e-05	0.00145971	31 / 61	31 / 2514
10.03.01.01	mitotic cell cycle	Cell cycle and DNA processing	ANIA_00228 | ANIA_02137 | ANIA_02143 | ANIA_02491 | ANIA_02847 | ANIA_03451 | ANIA_03648 | ANIA_03795 | ANIA_04265 | ANIA_04597 | ANIA_05406 | ANIA_05495 | ANIA_05815 | ANIA_05899 | ANIA_06070 | ANIA_06364 | ANIA_07296 | ANIA_07994 | ANIA_08056 | ANIA_08783 | ANIA_10497	9.41451e-05	0.00154626	21 / 36	21 / 2514
11.02	RNA synthesis	Transcription	ANIA_00124 | ANIA_00176 | ANIA_00260 | ANIA_00292 | ANIA_00310 | ANIA_00583 | ANIA_01024 | ANIA_01060 | ANIA_01200 | ANIA_01226 | ANIA_01255 | ANIA_01265 | ANIA_01286 | ANIA_01353 | ANIA_01447 | ANIA_01460 | ANIA_01750 | ANIA_01984 | ANIA_02296 | ANIA_02689 | ANIA_02850 | ANIA_02911 | ANIA_02932 | ANIA_03033 | ANIA_03063 | ANIA_03427 | ANIA_03739 | ANIA_03785 | ANIA_04034 | ANIA_04080 | ANIA_0423…	0.000120122	0.00191489	66 / 161	66 / 2514
10.01.03.05	extension/ polymerization activity	Cell cycle and DNA processing	ANIA_00260 | ANIA_02764 | ANIA_02969 | ANIA_03033 | ANIA_03035 | ANIA_03067 | ANIA_03944 | ANIA_05406 | ANIA_05617 | ANIA_06069 | ANIA_06300 | ANIA_06517 | ANIA_06694 | ANIA_06896 | ANIA_07014 | ANIA_07325 | ANIA_07423 | ANIA_07439 | ANIA_07748 | ANIA_08064 | ANIA_10470 | ANIA_10755 | ANIA_10855	0.00026506	0.00410464	23 / 43	23 / 2514
02.45.15	energy generation (e.g. ATP synthase)	Energy	ANIA_00252 | ANIA_00357 | ANIA_00943 | ANIA_01523 | ANIA_01534 | ANIA_01624 | ANIA_02315 | ANIA_05998 | ANIA_06287 | ANIA_06631 | ANIA_10032 | ANIA_11303 | ANIA_11444 | ANIA_11565	0.000413659	0.00622787	14 / 22	14 / 2514
11.04.03.01	splicing	Transcription	ANIA_00109 | ANIA_00211 | ANIA_00289 | ANIA_00310 | ANIA_00583 | ANIA_00695 | ANIA_00745 | ANIA_00767 | ANIA_00894 | ANIA_00990 | ANIA_01255 | ANIA_01319 | ANIA_01408 | ANIA_01413 | ANIA_01495 | ANIA_01635 | ANIA_01709 | ANIA_01750 | ANIA_02007 | ANIA_02105 | ANIA_02457 | ANIA_02932 | ANIA_02939 | ANIA_03427 | ANIA_03651 | ANIA_03690 | ANIA_04232 | ANIA_04233 | ANIA_04298 | ANIA_04412 | ANIA_0452…	0.000448277	0.00656665	77 / 201	77 / 2514
14.07.04	modification by acetylation, deacetylation	Protein fate (folding, modification, destination)	ANIA_00083 | ANIA_00292 | ANIA_00310 | ANIA_00668 | ANIA_00719 | ANIA_01226 | ANIA_01328 | ANIA_01546 | ANIA_02102 | ANIA_02479 | ANIA_02745 | ANIA_03628 | ANIA_04072 | ANIA_04163 | ANIA_04309 | ANIA_04472 | ANIA_04648 | ANIA_04894 | ANIA_04993 | ANIA_05570 | ANIA_05640 | ANIA_05891 | ANIA_06214 | ANIA_06542 | ANIA_07009 | ANIA_08187 | ANIA_08232 | ANIA_09077 | ANIA_10449 | ANIA_10551 | ANIA_1095…	0.000570848	0.00814209	32 / 69	32 / 2514
12.07	translational control	Protein synthesis	ANIA_00410 | ANIA_01345 | ANIA_01387 | ANIA_02226 | ANIA_02751 | ANIA_02775 | ANIA_02932 | ANIA_03156 | ANIA_03411 | ANIA_03413 | ANIA_04000 | ANIA_04330 | ANIA_04404 | ANIA_04530 | ANIA_04723 | ANIA_04803 | ANIA_04865 | ANIA_05055 | ANIA_05222 | ANIA_05770 | ANIA_06082 | ANIA_06156 | ANIA_06522 | ANIA_06540 | ANIA_06563 | ANIA_06577 | ANIA_06585 | ANIA_06630 | ANIA_07014 | ANIA_07299 | ANIA_0765…	0.000646394	0.00875864	40 / 92	40 / 2514
2.13	respiration	Energy	ANIA_00252 | ANIA_00346 | ANIA_00357 | ANIA_00432 | ANIA_00554 | ANIA_00726 | ANIA_00896 | ANIA_00943 | ANIA_01094 | ANIA_01523 | ANIA_01534 | ANIA_01543 | ANIA_01624 | ANIA_01915 | ANIA_02306 | ANIA_02315 | ANIA_03843 | ANIA_03922 | ANIA_04054 | ANIA_04297 | ANIA_04525 | ANIA_04977 | ANIA_05670 | ANIA_05828 | ANIA_05971 | ANIA_06287 | ANIA_06366 | ANIA_06631 | ANIA_06699 | ANIA_08118 | ANIA_0813…	0.000646394	0.00875864	40 / 92	40 / 2514
01.02.03.01	sulfate assimilation	Metabolism	ANIA_01194 | ANIA_01752 | ANIA_01769 | ANIA_04769 | ANIA_04770 | ANIA_04774 | ANIA_07034 | ANIA_07600	0.000827191	0.0109351	8 / 10	8 / 2514
14.1	assembly of protein complexes	Protein fate (folding, modification, destination)	ANIA_00081 | ANIA_00316 | ANIA_00757 | ANIA_00905 | ANIA_01159 | ANIA_01230 | ANIA_01387 | ANIA_01394 | ANIA_01462 | ANIA_01495 | ANIA_01722 | ANIA_01915 | ANIA_02105 | ANIA_02317 | ANIA_02761 | ANIA_02861 | ANIA_02900 | ANIA_02975 | ANIA_03029 | ANIA_03172 | ANIA_03453 | ANIA_03598 | ANIA_03651 | ANIA_03785 | ANIA_03923 | ANIA_04226 | ANIA_04346 | ANIA_04386 | ANIA_04388 | ANIA_04415 | ANIA_0456…	0.00122186	0.0157678	90 / 248	90 / 2514
10.03.04.03	chromosome condensation	Cell cycle and DNA processing	ANIA_02143 | ANIA_03451 | ANIA_03468 | ANIA_03469 | ANIA_04265 | ANIA_04597 | ANIA_05899 | ANIA_06364 | ANIA_06694 | ANIA_07296 | ANIA_07465 | ANIA_07748 | ANIA_08056 | ANIA_10635	0.00142192	0.0179228	14 / 24	14 / 2514
01.03.16.01	RNA degradation	Metabolism	ANIA_00767 | ANIA_01158 | ANIA_01256 | ANIA_01387 | ANIA_01723 | ANIA_02080 | ANIA_02185 | ANIA_02457 | ANIA_02734 | ANIA_02896 | ANIA_03657 | ANIA_04723 | ANIA_04965 | ANIA_05114 | ANIA_05188 | ANIA_05482 | ANIA_05931 | ANIA_06111 | ANIA_06244 | ANIA_06902 | ANIA_07014 | ANIA_07424 | ANIA_07474 | ANIA_07492 | ANIA_10164 | ANIA_10348 | ANIA_10417 | ANIA_10955	0.00150688	0.018562	28 / 61	28 / 2514
43.01.03.05	budding, cell polarity and filament formation	Cell type differentiation	ANIA_00106 | ANIA_00163 | ANIA_00182 | ANIA_00393 | ANIA_00410 | ANIA_00594 | ANIA_00719 | ANIA_01025 | ANIA_01158 | ANIA_01181 | ANIA_01272 | ANIA_01334 | ANIA_01359 | ANIA_01394 | ANIA_01462 | ANIA_01485 | ANIA_01725 | ANIA_02067 | ANIA_02090 | ANIA_02137 | ANIA_02317 | ANIA_02457 | ANIA_02523 | ANIA_02687 | ANIA_02766 | ANIA_02885 | ANIA_02983 | ANIA_03095 | ANIA_03172 | ANIA_03422 | ANIA_0362…	0.00186378	0.0220165	90 / 251	90 / 2514
16.19.03	ATP binding	Protein with binding function or cofactor requirement (structural or analytic)	ANIA_00044 | ANIA_00106 | ANIA_00118 | ANIA_00124 | ANIA_00204 | ANIA_00228 | ANIA_00252 | ANIA_00327 | ANIA_00381 | ANIA_00404 | ANIA_00428 | ANIA_00474 | ANIA_00561 | ANIA_00565 | ANIA_00583 | ANIA_00782 | ANIA_00822 | ANIA_00894 | ANIA_00936 | ANIA_00984 | ANIA_00988 | ANIA_01024 | ANIA_01159 | ANIA_01193 | ANIA_01194 | ANIA_01201 | ANIA_01207 | ANIA_01222 | ANIA_01255 | ANIA_01256 | ANIA_0136…	0.00186856	0.0220165	192 / 587	192 / 2514
20.01.21	RNA transport	Cellular transport, transport facilitation and transport routes	ANIA_00084 | ANIA_00310 | ANIA_00926 | ANIA_01064 | ANIA_01157 | ANIA_01190 | ANIA_02068 | ANIA_02226 | ANIA_03651 | ANIA_03739 | ANIA_04000 | ANIA_04412 | ANIA_04862 | ANIA_05482 | ANIA_05627 | ANIA_05717 | ANIA_06006 | ANIA_06523 | ANIA_06738 | ANIA_07182 | ANIA_07659 | ANIA_07726 | ANIA_08268 | ANIA_08722 | ANIA_08787 | ANIA_10112 | ANIA_10164 | ANIA_10526 | ANIA_10615 | ANIA_10941	0.00224638	0.0259051	30 / 68	30 / 2514
10.03.03	cytokinesis (cell division) /septum formation and hydrolysis	Cell cycle and DNA processing	ANIA_00182 | ANIA_00410 | ANIA_01024 | ANIA_01394 | ANIA_01551 | ANIA_02124 | ANIA_02128 | ANIA_02523 | ANIA_02847 | ANIA_02927 | ANIA_03094 | ANIA_03095 | ANIA_03124 | ANIA_03363 | ANIA_03941 | ANIA_04182 | ANIA_04278 | ANIA_04346 | ANIA_04417 | ANIA_04460 | ANIA_04667 | ANIA_04706 | ANIA_04873 | ANIA_04908 | ANIA_04963 | ANIA_05122 | ANIA_05495 | ANIA_05618 | ANIA_05674 | ANIA_05676 | ANIA_0575…	0.0038632	0.0428907	60 / 161	60 / 2514
42.04.05	microtubule cytoskeleton	Biogenesis of cellular components	ANIA_00084 | ANIA_00316 | ANIA_00676 | ANIA_00726 | ANIA_01182 | ANIA_02128 | ANIA_02927 | ANIA_03060 | ANIA_03185 | ANIA_03363 | ANIA_03721 | ANIA_03746 | ANIA_04460 | ANIA_04513 | ANIA_04917 | ANIA_05521 | ANIA_05618 | ANIA_05759 | ANIA_05815 | ANIA_06341 | ANIA_06697 | ANIA_06838 | ANIA_06863 | ANIA_06875 | ANIA_07570 | ANIA_08286 | ANIA_08783 | ANIA_09424 | ANIA_10017 | ANIA_10140 | ANIA_10627	0.00392221	0.0428907	31 / 73	31 / 2514
01.03.07	deoxyribonucleotide metabolism	Metabolism	ANIA_00067 | ANIA_00271 | ANIA_01495 | ANIA_02007 | ANIA_02105 | ANIA_03035 | ANIA_04380 | ANIA_04546 | ANIA_08213 | ANIA_09464 | ANIA_10257 | ANIA_10561	0.0039567	0.0428907	12 / 21	12 / 2514
GO
GO ID	GO name	GO namespace	Gene ID(s)	Exact p-value	Adjusted p-value	# genes / category	# genes / input
GO:0005840	ribosome	CC	ANIA_00116 | ANIA_00123 | ANIA_00142 | ANIA_00445 | ANIA_00465 | ANIA_00570 | ANIA_00776 | ANIA_00907 | ANIA_01013 | ANIA_01095 | ANIA_01228 | ANIA_01345 | ANIA_01348 | ANIA_01770 | ANIA_01954 | ANIA_01964 | ANIA_01970 | ANIA_02057 | ANIA_02734 | ANIA_02980 | ANIA_03173 | ANIA_03413 | ANIA_03595 | ANIA_03649 | ANIA_03744 | ANIA_03823 | ANIA_04073 | ANIA_04087 | ANIA_04222 | ANIA_04308 | ANIA_0445…	5.891233e-65	7.929599e-62	113 / 119	113 / 2514
GO:0003735	structural constituent of ribosome	MF	ANIA_00116 | ANIA_00123 | ANIA_00142 | ANIA_00445 | ANIA_00465 | ANIA_00570 | ANIA_00776 | ANIA_00907 | ANIA_01013 | ANIA_01095 | ANIA_01228 | ANIA_01345 | ANIA_01348 | ANIA_01393 | ANIA_01770 | ANIA_01964 | ANIA_01970 | ANIA_02057 | ANIA_02734 | ANIA_02980 | ANIA_03173 | ANIA_03413 | ANIA_03649 | ANIA_03823 | ANIA_04073 | ANIA_04087 | ANIA_04222 | ANIA_04308 | ANIA_04452 | ANIA_04475 | ANIA_0452…	2.085545e-60	1.403572e-57	100 / 103	100 / 2514
GO:0006412	translation	BP	ANIA_00116 | ANIA_00123 | ANIA_00142 | ANIA_00428 | ANIA_00445 | ANIA_00465 | ANIA_00570 | ANIA_00776 | ANIA_00907 | ANIA_01013 | ANIA_01095 | ANIA_01228 | ANIA_01345 | ANIA_01348 | ANIA_01393 | ANIA_01770 | ANIA_01964 | ANIA_01970 | ANIA_02057 | ANIA_02775 | ANIA_02980 | ANIA_03173 | ANIA_03411 | ANIA_03413 | ANIA_03649 | ANIA_03823 | ANIA_04073 | ANIA_04087 | ANIA_04222 | ANIA_04308 | ANIA_0445…	2.093129e-57	9.391173e-55	112 / 125	112 / 2514
GO:0030529	ribonucleoprotein complex	CC	ANIA_00109 | ANIA_00116 | ANIA_00142 | ANIA_00305 | ANIA_00445 | ANIA_00465 | ANIA_00695 | ANIA_00767 | ANIA_00776 | ANIA_00907 | ANIA_01095 | ANIA_01119 | ANIA_01319 | ANIA_01345 | ANIA_01348 | ANIA_01495 | ANIA_01770 | ANIA_01964 | ANIA_01983 | ANIA_02007 | ANIA_02105 | ANIA_02734 | ANIA_03173 | ANIA_03413 | ANIA_03794 | ANIA_03823 | ANIA_04073 | ANIA_04087 | ANIA_04222 | ANIA_04308 | ANIA_0445…	6.962107e-40	2.342749e-37	84 / 98	84 / 2514
GO:0005622	intracellular	CC	ANIA_00123 | ANIA_00445 | ANIA_00465 | ANIA_00570 | ANIA_00776 | ANIA_01013 | ANIA_01025 | ANIA_01228 | ANIA_01345 | ANIA_01348 | ANIA_01635 | ANIA_01770 | ANIA_01964 | ANIA_01970 | ANIA_02057 | ANIA_02130 | ANIA_02147 | ANIA_02343 | ANIA_02734 | ANIA_02875 | ANIA_02980 | ANIA_03092 | ANIA_03173 | ANIA_03649 | ANIA_03735 | ANIA_03746 | ANIA_03823 | ANIA_04034 | ANIA_04073 | ANIA_04087 | ANIA_0416…	1.471837e-29	3.962186e-27	124 / 211	124 / 2514
GO:0003723	RNA binding	MF	ANIA_00142 | ANIA_00189 | ANIA_00984 | ANIA_01319 | ANIA_01709 | ANIA_01723 | ANIA_01957 | ANIA_02068 | ANIA_02147 | ANIA_03156 | ANIA_03411 | ANIA_03413 | ANIA_03649 | ANIA_04015 | ANIA_04087 | ANIA_04523 | ANIA_04546 | ANIA_04581 | ANIA_04594 | ANIA_04803 | ANIA_04889 | ANIA_04943 | ANIA_05114 | ANIA_05164 | ANIA_05441 | ANIA_06171 | ANIA_06507 | ANIA_06698 | ANIA_07474 | ANIA_08073 | ANIA_0819…	2.158822e-11	4.842958e-9	50 / 90	50 / 2514
GO:0019013	viral nucleocapsid	CC	ANIA_00109 | ANIA_00305 | ANIA_00695 | ANIA_00767 | ANIA_01119 | ANIA_01495 | ANIA_01983 | ANIA_02007 | ANIA_02105 | ANIA_03794 | ANIA_04460 | ANIA_04648 | ANIA_05340 | ANIA_06171 | ANIA_06265 | ANIA_06676 | ANIA_06903 | ANIA_07458 | ANIA_00647 | ANIA_04226 | ANIA_04298 | ANIA_05779 | ANIA_06735 | ANIA_08183 | ANIA_10561 | ANIA_10848 | ANIA_10941	5.296595e-11	1.01846e-8	27 / 36	27 / 2514
GO:0000166	nucleotide binding	MF	ANIA_00059 | ANIA_00109 | ANIA_00228 | ANIA_00266 | ANIA_00381 | ANIA_00404 | ANIA_00428 | ANIA_00561 | ANIA_00936 | ANIA_01189 | ANIA_01207 | ANIA_01222 | ANIA_01322 | ANIA_01394 | ANIA_01408 | ANIA_01485 | ANIA_01708 | ANIA_01709 | ANIA_01851 | ANIA_01912 | ANIA_02080 | ANIA_02927 | ANIA_03070 | ANIA_03124 | ANIA_03171 | ANIA_03422 | ANIA_03427 | ANIA_03721 | ANIA_03869 | ANIA_04038 | ANIA_0425…	9.198361e-11	1.547624e-8	151 / 411	151 / 2514
GO:0006091	generation of precursor metabolites and energy	BP	ANIA_00357 | ANIA_00747 | ANIA_01063 | ANIA_01094 | ANIA_01189 | ANIA_01534 | ANIA_02316 | ANIA_04064 | ANIA_04525 | ANIA_04859 | ANIA_04927 | ANIA_05597 | ANIA_05629 | ANIA_06077 | ANIA_06287 | ANIA_06631 | ANIA_08118 | ANIA_08941 | ANIA_00252 | ANIA_01523 | ANIA_01628 | ANIA_02306 | ANIA_02315 | ANIA_02414 | ANIA_04388 | ANIA_05703 | ANIA_06255 | ANIA_08273	4.388732e-9	6.563592e-7	28 / 43	28 / 2514
GO:0006260	DNA replication	BP	ANIA_00228 | ANIA_02446 | ANIA_03033 | ANIA_03940 | ANIA_04380 | ANIA_05574 | ANIA_05617 | ANIA_05992 | ANIA_06070 | ANIA_06300 | ANIA_07308 | ANIA_07325 | ANIA_07439 | ANIA_07723 | ANIA_07994 | ANIA_08064 | ANIA_01779 | ANIA_02491 | ANIA_02969 | ANIA_06069 | ANIA_07423 | ANIA_10470 | ANIA_10497 | ANIA_10755 | ANIA_10855	2.199554e-8	2.9606e-06	25 / 38	25 / 2514
GO:0042254	ribosome biogenesis	BP	ANIA_00695 | ANIA_01215 | ANIA_01319 | ANIA_01474 | ANIA_02734 | ANIA_03745 | ANIA_04560 | ANIA_04708 | ANIA_05441 | ANIA_05865 | ANIA_06266 | ANIA_06334 | ANIA_06902 | ANIA_08491 | ANIA_01533 | ANIA_05520 | ANIA_05875 | ANIA_08254 | ANIA_10712	2.903796e-8	3.55319e-06	19 / 25	19 / 2514
GO:0015986	ATP synthesis coupled proton transport	BP	ANIA_00943 | ANIA_01534 | ANIA_06287 | ANIA_06631 | ANIA_00252 | ANIA_01523 | ANIA_02315 | ANIA_10032 | ANIA_10047 | ANIA_11303 | ANIA_11444 | ANIA_11499	2.211932e-7	2.48105e-05	12 / 13	12 / 2514
GO:0005525	GTP binding	MF	ANIA_00889 | ANIA_01215 | ANIA_01322 | ANIA_01394 | ANIA_01408 | ANIA_01912 | ANIA_02080 | ANIA_03171 | ANIA_04038 | ANIA_04708 | ANIA_04743 | ANIA_05020 | ANIA_05819 | ANIA_05865 | ANIA_06330 | ANIA_06334 | ANIA_06522 | ANIA_07487 | ANIA_08874 | ANIA_00089 | ANIA_00449 | ANIA_00692 | ANIA_01084 | ANIA_01666 | ANIA_03934 | ANIA_04080 | ANIA_04218 | ANIA_04470 | ANIA_04667 | ANIA_04685 | ANIA_0548…	3.811539e-7	3.94641e-05	39 / 80	39 / 2514
GO:0006099	tricarboxylic acid cycle	BP	ANIA_02295 | ANIA_02332 | ANIA_02435 | ANIA_02436 | ANIA_05571 | ANIA_08707 | ANIA_08793 | ANIA_01003 | ANIA_02916 | ANIA_02999 | ANIA_03466 | ANIA_05790 | ANIA_06499 | ANIA_06717	1.32729e-06	0.00012761	14 / 18	14 / 2514
GO:0015934	large ribosomal subunit	CC	ANIA_00570 | ANIA_00776 | ANIA_01095 | ANIA_01393 | ANIA_03649 | ANIA_01122 | ANIA_04652 | ANIA_06146 | ANIA_04202	1.7894e-06	0.000160569	9 / 9	9 / 2514
GO:1902600	hydrogen ion transmembrane transport	BP	ANIA_00357 | ANIA_00747 | ANIA_01189 | ANIA_01920 | ANIA_02316 | ANIA_04525 | ANIA_04859 | ANIA_04927 | ANIA_05597 | ANIA_07250 | ANIA_08118 | ANIA_08941 | ANIA_01628 | ANIA_02306 | ANIA_04388 | ANIA_06255 | ANIA_08273 | ANIA_10553 | ANIA_10585 | ANIA_11347	7.39097e-06	0.000617356	20 / 34	20 / 2514
GO:0019843	rRNA binding	MF	ANIA_01770 | ANIA_04803 | ANIA_05164 | ANIA_06171 | ANIA_09465 | ANIA_04794 | ANIA_06302 | ANIA_10161	7.79722e-06	0.000617356	8 / 8	8 / 2514
GO:0016125	sterol metabolic process	BP	ANIA_00579 | ANIA_00851 | ANIA_02311 | ANIA_03817 | ANIA_03869 | ANIA_04094 | ANIA_04414 | ANIA_04923 | ANIA_06506 | ANIA_07146 | ANIA_08012 | ANIA_08283 | ANIA_09496 | ANIA_00451 | ANIA_04042 | ANIA_05585 | ANIA_06973	1.01536e-05	0.000759261	17 / 27	17 / 2514
GO:0006364	rRNA processing	BP	ANIA_00189 | ANIA_01175 | ANIA_01964 | ANIA_03313 | ANIA_03823 | ANIA_04460 | ANIA_04648 | ANIA_04916 | ANIA_08073 | ANIA_00745 | ANIA_04298 | ANIA_05875 | ANIA_08293	1.28614e-05	0.000911131	13 / 18	13 / 2514
GO:0015935	small ribosomal subunit	CC	ANIA_01345 | ANIA_03413 | ANIA_04087 | ANIA_04594 | ANIA_04803 | ANIA_05441 | ANIA_00843 | ANIA_04251 | ANIA_05997	1.41995e-05	0.000955626	9 / 10	9 / 2514
GO:0051301	cell division	BP	ANIA_00655 | ANIA_00814 | ANIA_02130 | ANIA_04265 | ANIA_04963 | ANIA_05676 | ANIA_07487 | ANIA_09424 | ANIA_03187 | ANIA_03451	1.69835e-05	0.00108856	10 / 12	10 / 2514
GO:0003678	DNA helicase activity	MF	ANIA_00228 | ANIA_05278 | ANIA_05992 | ANIA_06070 | ANIA_07994 | ANIA_02491 | ANIA_10497	3.39634e-05	0.0019876	7 / 7	7 / 2514
GO:0022627	cytosolic small ribosomal subunit	CC	ANIA_00465 | ANIA_01964 | ANIA_03823 | ANIA_04087 | ANIA_04916 | ANIA_05979 | ANIA_06632	3.39634e-05	0.0019876	7 / 7	7 / 2514
GO:0008137	NADH dehydrogenase (ubiquinone) activity	MF	ANIA_01063 | ANIA_01094 | ANIA_03276 | ANIA_04288 | ANIA_05629 | ANIA_05704 | ANIA_06077 | ANIA_09078 | ANIA_00630 | ANIA_02260 | ANIA_02414 | ANIA_04297 | ANIA_10229 | ANIA_11377	5.33974e-05	0.00289182	14 / 22	14 / 2514
GO:0006730	one-carbon metabolic process	BP	ANIA_01222 | ANIA_01263 | ANIA_03840 | ANIA_05883 | ANIA_08215 | ANIA_02998 | ANIA_03058 | ANIA_10745	5.58598e-05	0.00289182	8 / 9	8 / 2514
GO:0046933	proton-transporting ATP synthase activity, rotational mechanism	MF	ANIA_01534 | ANIA_06287 | ANIA_00252 | ANIA_01523 | ANIA_02315 | ANIA_10032 | ANIA_10047 | ANIA_11499	5.58598e-05	0.00289182	8 / 9	8 / 2514
GO:0006414	translational elongation	BP	ANIA_00465 | ANIA_02734 | ANIA_03823 | ANIA_05719 | ANIA_05979 | ANIA_05996 | ANIA_06330 | ANIA_06563 | ANIA_01084 | ANIA_04218 | ANIA_06700 | ANIA_11128	9.68682e-05	0.00482906	12 / 18	12 / 2514
GO:0005524	ATP binding	MF	ANIA_00124 | ANIA_00228 | ANIA_00381 | ANIA_00404 | ANIA_00428 | ANIA_00561 | ANIA_00936 | ANIA_01189 | ANIA_01207 | ANIA_01222 | ANIA_01255 | ANIA_01485 | ANIA_01708 | ANIA_01709 | ANIA_01851 | ANIA_02255 | ANIA_02256 | ANIA_02278 | ANIA_02311 | ANIA_02435 | ANIA_02927 | ANIA_02973 | ANIA_03070 | ANIA_03124 | ANIA_03181 | ANIA_03422 | ANIA_03721 | ANIA_03840 | ANIA_03869 | ANIA_03946 | ANIA_0419…	0.000131687	0.00633038	132 / 432	132 / 2514
GO:0042555	MCM complex	CC	ANIA_00228 | ANIA_05992 | ANIA_06070 | ANIA_07994 | ANIA_02491 | ANIA_10497	0.000147884	0.00663506	6 / 6	6 / 2514
GO:0008121	ubiquinol-cytochrome-c reductase activity	MF	ANIA_00357 | ANIA_00747 | ANIA_05597 | ANIA_02306 | ANIA_04388 | ANIA_08273	0.000147884	0.00663506	6 / 6	6 / 2514
GO:0046961	proton-transporting ATPase activity, rotational mechanism	MF	ANIA_01534 | ANIA_04927 | ANIA_06287 | ANIA_06631 | ANIA_00252 | ANIA_01523 | ANIA_02315 | ANIA_10032 | ANIA_10047 | ANIA_11499	0.000161839	0.00702693	10 / 14	10 / 2514
GO:0004129	cytochrome-c oxidase activity	MF	ANIA_02316 | ANIA_04525 | ANIA_08118 | ANIA_06255 | ANIA_10553 | ANIA_10585 | ANIA_11347	0.000217127	0.00885613	7 / 8	7 / 2514
GO:0006270	DNA replication initiation	BP	ANIA_00228 | ANIA_05992 | ANIA_06070 | ANIA_07994 | ANIA_02491 | ANIA_10497 | ANIA_10755	0.000217127	0.00885613	7 / 8	7 / 2514
GO:0005730	nucleolus	CC	ANIA_01215 | ANIA_01319 | ANIA_01474 | ANIA_02120 | ANIA_02137 | ANIA_04648 | ANIA_05406 | ANIA_05717 | ANIA_05865 | ANIA_01666 | ANIA_05875	0.000285011	0.0112831	11 / 17	11 / 2514
GO:0006184	obsolete GTP catabolic process	BP	ANIA_00889 | ANIA_01215 | ANIA_01322 | ANIA_01408 | ANIA_01912 | ANIA_02080 | ANIA_04038 | ANIA_04708 | ANIA_06330 | ANIA_06334 | ANIA_06522 | ANIA_08874 | ANIA_01084 | ANIA_04218 | ANIA_04470 | ANIA_04685 | ANIA_05482 | ANIA_10535 | ANIA_10627	0.000380065	0.0146162	19 / 39	19 / 2514
GO:0007049	cell cycle	BP	ANIA_01394 | ANIA_04265 | ANIA_09424 | ANIA_03451 | ANIA_04667 | ANIA_06688 | ANIA_06977 | ANIA_08182 | ANIA_10595	0.000509372	0.0190448	9 / 13	9 / 2514
GO:0003924	GTPase activity	MF	ANIA_00889 | ANIA_01215 | ANIA_01322 | ANIA_01408 | ANIA_01912 | ANIA_02080 | ANIA_04038 | ANIA_04708 | ANIA_06330 | ANIA_06334 | ANIA_06522 | ANIA_08874 | ANIA_01084 | ANIA_04218 | ANIA_04470 | ANIA_05482 | ANIA_10535 | ANIA_10627	0.0005514	0.0195393	18 / 37	18 / 2514
GO:0004386	helicase activity	MF	ANIA_00228 | ANIA_01255 | ANIA_02255 | ANIA_02256 | ANIA_02973 | ANIA_04412 | ANIA_05278 | ANIA_05643 | ANIA_05992 | ANIA_06585 | ANIA_06707 | ANIA_07538 | ANIA_07994 | ANIA_00894 | ANIA_01024 | ANIA_02491 | ANIA_04723 | ANIA_06085 | ANIA_07014 | ANIA_10125 | ANIA_10194 | ANIA_10417 | ANIA_10497	0.000562448	0.0195393	23 / 52	23 / 2514
GO:0005739	mitochondrion	CC	ANIA_01094 | ANIA_01709 | ANIA_02185 | ANIA_04255 | ANIA_04415 | ANIA_04708 | ANIA_06248 | ANIA_07629 | ANIA_08780 | ANIA_09078 | ANIA_00630 | ANIA_02306 | ANIA_02999 | ANIA_04388 | ANIA_06255 | ANIA_10512 | ANIA_10713 | ANIA_10879 | ANIA_11136 | ANIA_11347 | ANIA_11377 | ANIA_04164	0.000573165	0.0195393	22 / 49	22 / 2514
GO:0005643	nuclear pore	CC	ANIA_01064 | ANIA_01157 | ANIA_01238 | ANIA_02511 | ANIA_05485 | ANIA_05499 | ANIA_05627 | ANIA_01190 | ANIA_04417 | ANIA_06738 | ANIA_09109	0.000580664	0.0195393	11 / 18	11 / 2514
GO:0003899	DNA-directed RNA polymerase activity	MF	ANIA_00809 | ANIA_01447 | ANIA_02283 | ANIA_02415 | ANIA_02747 | ANIA_03033 | ANIA_03933 | ANIA_06252 | ANIA_06558 | ANIA_07609 | ANIA_09102 | ANIA_10970 | ANIA_11183 | ANIA_11406	0.000624628	0.0205061	14 / 26	14 / 2514
GO:0003989	acetyl-CoA carboxylase activity	MF	ANIA_04690 | ANIA_05904 | ANIA_06126 | ANIA_09408 | ANIA_09407	0.00064368	0.0206284	5 / 5	5 / 2514
GO:0016651	oxidoreductase activity, acting on NAD(P)H	MF	ANIA_04288 | ANIA_05629 | ANIA_05971 | ANIA_02414 | ANIA_05703 | ANIA_10229	0.000831408	0.026025	6 / 7	6 / 2514
GO:0005743	mitochondrial inner membrane	CC	ANIA_01230 | ANIA_04064 | ANIA_05356 | ANIA_05971 | ANIA_08118 | ANIA_04388 | ANIA_10568 | ANIA_10585 | ANIA_11347	0.00113493	0.0339471	9 / 14	9 / 2514
GO:0008017	microtubule binding	MF	ANIA_02128 | ANIA_03124 | ANIA_03721 | ANIA_06875 | ANIA_08251 | ANIA_10225 | ANIA_08286 | ANIA_04513 | ANIA_06863	0.00113493	0.0339471	9 / 14	9 / 2514
GO:0009055	electron carrier activity	MF	ANIA_00357 | ANIA_02332 | ANIA_04288 | ANIA_05998 | ANIA_06077 | ANIA_08793 | ANIA_09464 | ANIA_02260 | ANIA_06699 | ANIA_10278	0.00157326	0.0460351	10 / 17	10 / 2514
KEGG pathway ID	KEGG pathway name	KEGG main category	Gene ID(s)	Exact p-value	Adjusted p-value	# genes / category	# genes / input
3010	Ribosome	Genetic Information Processing	AN0116.2 | AN0123.2 | AN0142.2 | AN0262.2 | AN0433.2 | AN0445.2 | AN0465.2 | AN0470.2 | AN0570.2 | AN0776.2 | AN0843.2 | AN0907.2 | AN1013.2 | AN1095.2 | AN1122.2 | AN1166.2 | AN1228.2 | AN1345.2 | AN1393.2 | AN1770.2 | AN1964.2 | AN1970.2 | AN2057.2 | AN2268.2 | AN2275.2 | AN2734.2 | AN2980.2 | AN3172.2 | AN3413.2 | AN3706.2 | AN3823.2 | AN4016.2 | AN4060.2 | AN4073.2 | AN4087.2 | AN4202.2 | AN4…	6.224644e-35	6.535876e-33	88 / 90	88 / 2514
190	Oxidative phosphorylation	Metabolism	AN0252.2 | AN0357.2 | AN0896.2 | AN0943.2 | AN1063.2 | AN1523.2 | AN1534.2 | AN1624.2 | AN1722.2 | AN1915.2 | AN2306.2 | AN2315.2 | AN2316.2 | AN2332.2 | AN2414.2 | AN2916.2 | AN2968.2 | AN3922.2 | AN4288.2 | AN4297.2 | AN4388.2 | AN4525.2 | AN4718.2 | AN4859.2 | AN4927.2 | AN5597.2 | AN5629.2 | AN5704.2 | AN5971.2 | AN6077.2 | AN6255.2 | AN6287.2 | AN6557.2 | AN6631.2 | AN8049.2 | AN8118.2 | AN8…	1.424353e-7	7.47785e-06	40 / 54	40 / 2514
20	Citrate cycle (TCA cycle)	Metabolism	AN0896.2 | AN1003.2 | AN1193.2 | AN1918.2 | AN2295.2 | AN2332.2 | AN2435.2 | AN2436.2 | AN2916.2 | AN2999.2 | AN3466.2 | AN5162.2 | AN5525.2 | AN5571.2 | AN5790.2 | AN6499.2 | AN6650.2 | AN6708.2 | AN6717.2 | AN8275.2 | AN8707.2 | AN8793.2 | AN9403.2	2.408677e-7	8.43037e-06	23 / 26	23 / 2514
3030	DNA replication	Genetic Information Processing	AN0228.2 | AN0260.2 | AN2446.2 | AN2491.2 | AN2764.2 | AN2969.2 | AN3033.2 | AN3067.2 | AN5114.2 | AN5188.2 | AN5992.2 | AN6069.2 | AN6070.2 | AN6300.2 | AN6517.2 | AN7308.2 | AN7325.2 | AN7423.2 | AN7439.2 | AN7994.2 | AN8064.2	5.03295e-06	0.000132115	21 / 25	21 / 2514
240	Pyrimidine metabolism	Metabolism	AN0067.2 | AN0260.2 | AN0271.2 | AN0490.2 | AN0565.2 | AN0809.2 | AN1447.2 | AN2243.2 | AN2283.2 | AN2415.2 | AN2446.2 | AN2747.2 | AN3033.2 | AN3067.2 | AN3933.2 | AN4258.2 | AN4380.2 | AN5884.2 | AN5909.2 | AN5939.2 | AN6157.2 | AN6252.2 | AN6558.2 | AN7308.2 | AN7325.2 | AN7429.2 | AN7439.2 | AN7471.2 | AN7502.2 | AN8213.2 | AN8216.2 | AN8272.2 | AN8869.2 | AN9102.2	5.47738e-05	0.00115025	34 / 51	34 / 2514
3008	Ribosome biogenesis in eukaryotes	Genetic Information Processing	AN0124.2 | AN0189.2 | AN0247.2 | AN0305.2 | AN0647.2 | AN0695.2 | AN0745.2 | AN1215.2 | AN1272.2 | AN1319.2 | AN1366.2 | AN1474.2 | AN1485.2 | AN1666.2 | AN1983.2 | AN2759.2 | AN3167.2 | AN3652.2 | AN3794.2 | AN4298.2 | AN4330.2 | AN4460.2 | AN4563.2 | AN4648.2 | AN5455.2 | AN5482.2 | AN5865.2 | AN6171.2 | AN6310.2 | AN6334.2 | AN7458.2 | AN8183.2 | AN8254.2 | AN8293.2 | AN8691.2 | AN8851.2	0.000105429	0.00184501	36 / 56	36 / 2514
mt vs mc	up-regulated genes	DatfA mutant Cd treated vs. DatfA mutant untreated
FunCat
FunCat ID	FunCat description	FunCat main category	Gene ID(s)	Exact p-value	Adjusted p-value	# genes / category	# genes / input
14.13.01.01	proteasomal degradation (ubiquitin/proteasomal pathway)	Protein fate (folding, modification, destination)	ANIA_00226 | ANIA_00261 | ANIA_00295 | ANIA_00329 | ANIA_00482 | ANIA_00770 | ANIA_00810 | ANIA_01019 | ANIA_01209 | ANIA_01488 | ANIA_01491 | ANIA_01539 | ANIA_01700 | ANIA_01757 | ANIA_01922 | ANIA_02045 | ANIA_02073 | ANIA_02085 | ANIA_02212 | ANIA_02213 | ANIA_02233 | ANIA_02302 | ANIA_02416 | ANIA_02521 | ANIA_02904 | ANIA_02917 | ANIA_03019 | ANIA_03136 | ANIA_03449 | ANIA_03493 | ANIA_0362…	1.51013e-17	8.184907e-15	88 / 159	88 / 2482
32.01	stress response	Cell rescue, defense and virulence	ANIA_00034 | ANIA_00075 | ANIA_00241 | ANIA_00248 | ANIA_00349 | ANIA_00573 | ANIA_00847 | ANIA_01047 | ANIA_01209 | ANIA_01282 | ANIA_01306 | ANIA_01545 | ANIA_01700 | ANIA_01731 | ANIA_01757 | ANIA_01922 | ANIA_02000 | ANIA_02062 | ANIA_02085 | ANIA_02213 | ANIA_02269 | ANIA_02432 | ANIA_02731 | ANIA_02822 | ANIA_02846 | ANIA_02904 | ANIA_02917 | ANIA_02943 | ANIA_02981 | ANIA_03019 | ANIA_0326…	2.110849e-11	5.7204e-9	114 / 270	114 / 2482
14.07.11	protein processing (proteolytic)	Protein fate (folding, modification, destination)	ANIA_00369 | ANIA_00788 | ANIA_01104 | ANIA_01209 | ANIA_01525 | ANIA_01700 | ANIA_01757 | ANIA_01922 | ANIA_01981 | ANIA_02085 | ANIA_02213 | ANIA_02810 | ANIA_02903 | ANIA_02904 | ANIA_02917 | ANIA_02946 | ANIA_03019 | ANIA_03091 | ANIA_03149 | ANIA_03493 | ANIA_03756 | ANIA_03932 | ANIA_04236 | ANIA_04449 | ANIA_04457 | ANIA_04492 | ANIA_04775 | ANIA_04783 | ANIA_04869 | ANIA_05121 | ANIA_0574…	1.511163e-10	2.730168e-8	53 / 98	53 / 2482
18.02.01	enzymatic activity regulation / enzyme regulator	Regulation of metabolism and protein function	ANIA_00120 | ANIA_00241 | ANIA_00770 | ANIA_01209 | ANIA_01211 | ANIA_01491 | ANIA_01539 | ANIA_01545 | ANIA_01554 | ANIA_01700 | ANIA_01922 | ANIA_02073 | ANIA_02162 | ANIA_02211 | ANIA_02213 | ANIA_02233 | ANIA_02269 | ANIA_02416 | ANIA_02425 | ANIA_02441 | ANIA_02455 | ANIA_02893 | ANIA_02902 | ANIA_02904 | ANIA_02917 | ANIA_03019 | ANIA_03435 | ANIA_03623 | ANIA_03716 | ANIA_03905 | ANIA_0401…	6.377736e-9	8.641832e-7	69 / 152	69 / 2482
14.13.01	cytoplasmic and nuclear protein degradation	Protein fate (folding, modification, destination)	ANIA_00122 | ANIA_00226 | ANIA_00329 | ANIA_00369 | ANIA_01209 | ANIA_01539 | ANIA_01757 | ANIA_01850 | ANIA_01879 | ANIA_02000 | ANIA_02212 | ANIA_02213 | ANIA_02413 | ANIA_02416 | ANIA_02441 | ANIA_02903 | ANIA_02904 | ANIA_02917 | ANIA_02986 | ANIA_03464 | ANIA_03716 | ANIA_04236 | ANIA_04449 | ANIA_04457 | ANIA_04731 | ANIA_04869 | ANIA_05442 | ANIA_05653 | ANIA_05747 | ANIA_05872 | ANIA_0589…	1.94615e-06	0.000210962	55 / 128	55 / 2482
32.01.11	nutrient starvation response	Cell rescue, defense and virulence	ANIA_00564 | ANIA_00948 | ANIA_01420 | ANIA_01632 | ANIA_01685 | ANIA_02269 | ANIA_02516 | ANIA_02873 | ANIA_02903 | ANIA_03669 | ANIA_04419 | ANIA_04887 | ANIA_05601 | ANIA_05919 | ANIA_07252 | ANIA_07321 | ANIA_07760 | ANIA_08102 | ANIA_08340 | ANIA_08622 | ANIA_09165 | ANIA_10030 | ANIA_10563	1.14805e-05	0.00103707	23 / 41	23 / 2482
14.13	protein/peptide degradation	Protein fate (folding, modification, destination)	ANIA_00030 | ANIA_00122 | ANIA_00139 | ANIA_00329 | ANIA_00349 | ANIA_00369 | ANIA_00573 | ANIA_00770 | ANIA_00788 | ANIA_01019 | ANIA_01209 | ANIA_01757 | ANIA_01850 | ANIA_01875 | ANIA_01879 | ANIA_02085 | ANIA_02212 | ANIA_02213 | ANIA_02304 | ANIA_02413 | ANIA_02416 | ANIA_02421 | ANIA_02503 | ANIA_02513 | ANIA_02810 | ANIA_02903 | ANIA_02946 | ANIA_03003 | ANIA_03091 | ANIA_03098 | ANIA_0344…	2.328e-05	0.00180254	77 / 209	77 / 2482
14.07.11.01	autoproteolytic processing	Protein fate (folding, modification, destination)	ANIA_00127 | ANIA_00261 | ANIA_01632 | ANIA_03470 | ANIA_03584 | ANIA_03720 | ANIA_05131 | ANIA_05174 | ANIA_05491 | ANIA_05919 | ANIA_06351 | ANIA_06615 | ANIA_07428 | ANIA_11004	0.000192621	0.0130501	14 / 23	14 / 2482
14.01	protein folding and stabilization	Protein fate (folding, modification, destination)	ANIA_00075 | ANIA_00135 | ANIA_00241 | ANIA_00248 | ANIA_00295 | ANIA_00349 | ANIA_00834 | ANIA_00847 | ANIA_01047 | ANIA_01282 | ANIA_01510 | ANIA_01639 | ANIA_02051 | ANIA_02062 | ANIA_02432 | ANIA_02731 | ANIA_03098 | ANIA_03375 | ANIA_03519 | ANIA_03592 | ANIA_04192 | ANIA_04403 | ANIA_04467 | ANIA_04583 | ANIA_04623 | ANIA_04857 | ANIA_05129 | ANIA_05602 | ANIA_05906 | ANIA_06087 | ANIA_0608…	0.000527133	0.0278436	47 / 125	47 / 2482
12.1	aminoacyl-tRNA-synthetases	Protein synthesis	ANIA_00046 | ANIA_00057 | ANIA_00314 | ANIA_00705 | ANIA_01380 | ANIA_02150 | ANIA_03073 | ANIA_03824 | ANIA_04086 | ANIA_04584 | ANIA_05662 | ANIA_06368 | ANIA_07321 | ANIA_07479 | ANIA_08800 | ANIA_09157 | ANIA_09419 | ANIA_10195 | ANIA_10475 | ANIA_11125	0.000533592	0.0278436	20 / 41	20 / 2482
14.07.07	modification by ubiquitin-related proteins	Protein fate (folding, modification, destination)	ANIA_00304 | ANIA_01019 | ANIA_01173 | ANIA_01491 | ANIA_01539 | ANIA_02233 | ANIA_02302 | ANIA_02416 | ANIA_02441 | ANIA_03470 | ANIA_03623 | ANIA_03689 | ANIA_04492 | ANIA_04783 | ANIA_05121 | ANIA_05798 | ANIA_07259 | ANIA_07428 | ANIA_10456 | ANIA_10516 | ANIA_10519	0.000565091	0.0278436	21 / 44	21 / 2482
16.19.03	ATP binding	Protein with binding function or cofactor requirement (structural or analytic)	ANIA_00034 | ANIA_00046 | ANIA_00057 | ANIA_00097 | ANIA_00122 | ANIA_00210 | ANIA_00225 | ANIA_00226 | ANIA_00253 | ANIA_00314 | ANIA_00349 | ANIA_00482 | ANIA_00576 | ANIA_00699 | ANIA_00705 | ANIA_00708 | ANIA_00771 | ANIA_00810 | ANIA_00847 | ANIA_00887 | ANIA_00948 | ANIA_01014 | ANIA_01019 | ANIA_01047 | ANIA_01211 | ANIA_01266 | ANIA_01296 | ANIA_01326 | ANIA_01380 | ANIA_01488 | ANIA_0156…	0.000665662	0.0300657	175 / 587	175 / 2482
14.07.05	modification by ubiquitination, deubiquitination	Protein fate (folding, modification, destination)	ANIA_00226 | ANIA_00329 | ANIA_00482 | ANIA_00810 | ANIA_01019 | ANIA_01488 | ANIA_02000 | ANIA_02073 | ANIA_02162 | ANIA_02212 | ANIA_02302 | ANIA_02304 | ANIA_02413 | ANIA_02416 | ANIA_02441 | ANIA_02521 | ANIA_03003 | ANIA_03136 | ANIA_03449 | ANIA_03470 | ANIA_03646 | ANIA_03689 | ANIA_03999 | ANIA_04784 | ANIA_05517 | ANIA_05906 | ANIA_06086 | ANIA_06136 | ANIA_06354 | ANIA_06609 | ANIA_0689…	0.000741503	0.030915	48 / 130	48 / 2482
20.09.07.03	ER to Golgi transport	Cellular transport, transport facilitation and transport routes	ANIA_00112 | ANIA_00261 | ANIA_00706 | ANIA_00922 | ANIA_01069 | ANIA_01117 | ANIA_01154 | ANIA_02518 | ANIA_02738 | ANIA_03080 | ANIA_03098 | ANIA_03720 | ANIA_04165 | ANIA_04317 | ANIA_04446 | ANIA_04528 | ANIA_04884 | ANIA_05195 | ANIA_06033 | ANIA_06257 | ANIA_06267 | ANIA_06307 | ANIA_07254 | ANIA_07302 | ANIA_07679 | ANIA_08194 | ANIA_09526	0.00111622	0.0427663	27 / 64	27 / 2482
30.01.05	enzyme mediated signal transduction	Cellular communication / signal transduction mechanism	ANIA_00699 | ANIA_01491 | ANIA_01539 | ANIA_02233 | ANIA_02581 | ANIA_02943 | ANIA_03623 | ANIA_04113 | ANIA_04192 | ANIA_04447 | ANIA_04492 | ANIA_04536 | ANIA_04783 | ANIA_05121 | ANIA_05728 | ANIA_05798 | ANIA_06391 | ANIA_06820 | ANIA_07321 | ANIA_09008 | ANIA_09048 | ANIA_10519	0.00118357	0.0427663	22 / 49	22 / 2482
GO
GO ID	GO name	GO namespace	Gene ID(s)	Exact p-value	Adjusted p-value	# genes / category	# genes / input
GO:0000502	proteasome complex	CC	ANIA_01209 | ANIA_01700 | ANIA_01757 | ANIA_01922 | ANIA_02085 | ANIA_02213 | ANIA_03756 | ANIA_03932 | ANIA_04449 | ANIA_04731 | ANIA_04775 | ANIA_05607 | ANIA_05784 | ANIA_05793 | ANIA_05872 | ANIA_06547 | ANIA_06726 | ANIA_07579 | ANIA_02904 | ANIA_03019 | ANIA_04457 | ANIA_04492 | ANIA_04869 | ANIA_05774 | ANIA_08054 | ANIA_10020 | ANIA_10337 | ANIA_10519 | ANIA_10708	1.252369e-15	1.421438e-12	29 / 32	29 / 2482
GO:0004298	threonine-type endopeptidase activity	MF	ANIA_01757 | ANIA_02085 | ANIA_03493 | ANIA_03756 | ANIA_03932 | ANIA_04449 | ANIA_05784 | ANIA_05793 | ANIA_05872 | ANIA_06547 | ANIA_06726 | ANIA_04457 | ANIA_04869 | ANIA_08054 | ANIA_10708	3.707692e-10	1.052058e-7	15 / 15	15 / 2482
GO:0051603	proteolysis involved in cellular protein catabolic process	BP	ANIA_01757 | ANIA_02085 | ANIA_03493 | ANIA_03756 | ANIA_03932 | ANIA_04449 | ANIA_05784 | ANIA_05793 | ANIA_05872 | ANIA_06547 | ANIA_06726 | ANIA_04457 | ANIA_04869 | ANIA_08054 | ANIA_10708	3.707692e-10	1.052058e-7	15 / 15	15 / 2482
GO:0005839	proteasome core complex	CC	ANIA_01757 | ANIA_02085 | ANIA_03493 | ANIA_03756 | ANIA_03932 | ANIA_04449 | ANIA_05784 | ANIA_05793 | ANIA_05872 | ANIA_06547 | ANIA_06726 | ANIA_04457 | ANIA_04869 | ANIA_08054 | ANIA_10708	3.707692e-10	1.052058e-7	15 / 15	15 / 2482
GO:0008270	zinc ion binding	MF	ANIA_00096 | ANIA_00158 | ANIA_00388 | ANIA_00507 | ANIA_00677 | ANIA_00895 | ANIA_00902 | ANIA_00928 | ANIA_01232 | ANIA_01488 | ANIA_01678 | ANIA_01777 | ANIA_01824 | ANIA_01875 | ANIA_01888 | ANIA_01909 | ANIA_01956 | ANIA_02136 | ANIA_02162 | ANIA_02351 | ANIA_02354 | ANIA_02559 | ANIA_02615 | ANIA_02644 | ANIA_02865 | ANIA_03039 | ANIA_03050 | ANIA_03075 | ANIA_03137 | ANIA_03217 | ANIA_0326…	1.305377e-8	2.96321e-06	194 / 579	194 / 2482
GO:0000981	sequence-specific DNA binding RNA polymerase II transcription factor activity	MF	ANIA_00096 | ANIA_00388 | ANIA_00507 | ANIA_00902 | ANIA_00928 | ANIA_01232 | ANIA_01678 | ANIA_01824 | ANIA_02136 | ANIA_02354 | ANIA_02615 | ANIA_02644 | ANIA_03050 | ANIA_03075 | ANIA_03217 | ANIA_03269 | ANIA_03300 | ANIA_03356 | ANIA_03385 | ANIA_03420 | ANIA_03650 | ANIA_03683 | ANIA_04002 | ANIA_04118 | ANIA_04123 | ANIA_05390 | ANIA_05431 | ANIA_06392 | ANIA_06396 | ANIA_06762 | ANIA_0679…	7.53271e-8	1.27773e-05	114 / 310	114 / 2482
GO:0006357	regulation of transcription from RNA polymerase II promoter	BP	ANIA_00096 | ANIA_00388 | ANIA_00507 | ANIA_00902 | ANIA_00928 | ANIA_01232 | ANIA_01678 | ANIA_01824 | ANIA_02136 | ANIA_02354 | ANIA_02615 | ANIA_02644 | ANIA_03050 | ANIA_03075 | ANIA_03217 | ANIA_03269 | ANIA_03300 | ANIA_03356 | ANIA_03385 | ANIA_03420 | ANIA_03650 | ANIA_03683 | ANIA_04002 | ANIA_04118 | ANIA_04123 | ANIA_05375 | ANIA_05390 | ANIA_05431 | ANIA_06392 | ANIA_06396 | ANIA_0676…	7.880282e-8	1.27773e-05	116 / 317	116 / 2482
GO:0004175	endopeptidase activity	MF	ANIA_01757 | ANIA_02085 | ANIA_03756 | ANIA_03932 | ANIA_05793 | ANIA_05872 | ANIA_06547 | ANIA_06726 | ANIA_04457 | ANIA_04869 | ANIA_10708	1.223073e-7	1.73523e-05	11 / 11	11 / 2482
GO:0006366	transcription from RNA polymerase II promoter	BP	ANIA_00096 | ANIA_00388 | ANIA_00507 | ANIA_00902 | ANIA_00928 | ANIA_01232 | ANIA_01678 | ANIA_01824 | ANIA_02136 | ANIA_02354 | ANIA_02615 | ANIA_02644 | ANIA_03050 | ANIA_03075 | ANIA_03217 | ANIA_03269 | ANIA_03300 | ANIA_03356 | ANIA_03385 | ANIA_03420 | ANIA_03650 | ANIA_03683 | ANIA_04002 | ANIA_04118 | ANIA_04123 | ANIA_05375 | ANIA_05390 | ANIA_05431 | ANIA_06392 | ANIA_06396 | ANIA_0676…	4.691682e-7	5.91673e-05	115 / 323	115 / 2482
GO:0006355	regulation of transcription, DNA-templated	BP	ANIA_00096 | ANIA_00388 | ANIA_00507 | ANIA_00902 | ANIA_00928 | ANIA_01232 | ANIA_01678 | ANIA_01812 | ANIA_01824 | ANIA_02136 | ANIA_02211 | ANIA_02354 | ANIA_02615 | ANIA_02644 | ANIA_03050 | ANIA_03075 | ANIA_03217 | ANIA_03269 | ANIA_03300 | ANIA_03356 | ANIA_03385 | ANIA_03420 | ANIA_03650 | ANIA_03683 | ANIA_04002 | ANIA_04118 | ANIA_04123 | ANIA_04928 | ANIA_05218 | ANIA_05390 | ANIA_0540…	1.78931e-05	0.00203086	133 / 410	133 / 2482
GO:0008233	peptidase activity	MF	ANIA_00349 | ANIA_01525 | ANIA_01757 | ANIA_01850 | ANIA_02085 | ANIA_02903 | ANIA_03149 | ANIA_03756 | ANIA_03932 | ANIA_05638 | ANIA_05793 | ANIA_05872 | ANIA_06354 | ANIA_06487 | ANIA_06547 | ANIA_06726 | ANIA_07422 | ANIA_02810 | ANIA_03449 | ANIA_04457 | ANIA_04869 | ANIA_05588 | ANIA_09460 | ANIA_10030 | ANIA_10456 | ANIA_10708 | ANIA_11102 | ANIA_11133 | ANIA_11231	2.3476e-05	0.0024223	29 / 60	29 / 2482
GO:0006511	ubiquitin-dependent protein catabolic process	BP	ANIA_00329 | ANIA_00557 | ANIA_01757 | ANIA_05793 | ANIA_05872 | ANIA_06354 | ANIA_06547 | ANIA_06726 | ANIA_06913 | ANIA_07422 | ANIA_07579 | ANIA_08074 | ANIA_01019 | ANIA_04869 | ANIA_10008 | ANIA_10556 | ANIA_10877 | ANIA_11102	3.83988e-05	0.00350224	18 / 31	18 / 2482
GO:0019773	proteasome core complex, alpha-subunit complex	CC	ANIA_01757 | ANIA_05793 | ANIA_05872 | ANIA_06547 | ANIA_06726 | ANIA_04869 | ANIA_08054	4.01138e-05	0.00350224	7 / 7	7 / 2482
GO:0006508	proteolysis	BP	ANIA_00349 | ANIA_01104 | ANIA_01525 | ANIA_01757 | ANIA_01850 | ANIA_02085 | ANIA_02903 | ANIA_03149 | ANIA_03756 | ANIA_03882 | ANIA_03932 | ANIA_05432 | ANIA_05638 | ANIA_05793 | ANIA_05872 | ANIA_06354 | ANIA_06399 | ANIA_06487 | ANIA_06547 | ANIA_06726 | ANIA_07422 | ANIA_07858 | ANIA_07987 | ANIA_08102 | ANIA_08315 | ANIA_08608 | ANIA_09003 | ANIA_09372 | ANIA_01879 | ANIA_02503 | ANIA_0281…	7.14747e-05	0.00579456	47 / 119	47 / 2482
GO:0005737	cytoplasm	CC	ANIA_00057 | ANIA_00167 | ANIA_00314 | ANIA_00395 | ANIA_00705 | ANIA_00706 | ANIA_01080 | ANIA_01167 | ANIA_01380 | ANIA_01757 | ANIA_02085 | ANIA_02150 | ANIA_02213 | ANIA_02389 | ANIA_02410 | ANIA_02432 | ANIA_02516 | ANIA_02917 | ANIA_03223 | ANIA_03756 | ANIA_03824 | ANIA_03932 | ANIA_03999 | ANIA_04236 | ANIA_04584 | ANIA_04793 | ANIA_05662 | ANIA_05793 | ANIA_05820 | ANIA_05872 | ANIA_0607…	0.000146883	0.010967	68 / 193	68 / 2482
GO:0008080	N-acetyltransferase activity	MF	ANIA_00969 | ANIA_00987 | ANIA_01416 | ANIA_01621 | ANIA_03162 | ANIA_03344 | ANIA_05330 | ANIA_06411 | ANIA_07374 | ANIA_07944 | ANIA_08005 | ANIA_08373 | ANIA_08604 | ANIA_09204 | ANIA_03621 | ANIA_05053 | ANIA_08706 | ANIA_10234 | ANIA_10238 | ANIA_11043	0.000154601	0.010967	20 / 39	20 / 2482
GO:0042626	ATPase activity, coupled to transmembrane movement of substances	MF	ANIA_00225 | ANIA_00771 | ANIA_02300 | ANIA_02349 | ANIA_03329 | ANIA_03608 | ANIA_03952 | ANIA_06436 | ANIA_06581 | ANIA_06779 | ANIA_07729 | ANIA_07879 | ANIA_08150 | ANIA_08344 | ANIA_08489 | ANIA_07839 | ANIA_08813 | ANIA_08892 | ANIA_10949	0.000523844	0.0349743	19 / 39	19 / 2482
GO:0005524	ATP binding	MF	ANIA_00034 | ANIA_00057 | ANIA_00225 | ANIA_00314 | ANIA_00349 | ANIA_00576 | ANIA_00699 | ANIA_00705 | ANIA_00771 | ANIA_00847 | ANIA_00948 | ANIA_01047 | ANIA_01296 | ANIA_01380 | ANIA_01538 | ANIA_01564 | ANIA_01580 | ANIA_01789 | ANIA_01956 | ANIA_02062 | ANIA_02150 | ANIA_02180 | ANIA_02213 | ANIA_02269 | ANIA_02300 | ANIA_02349 | ANIA_02373 | ANIA_02416 | ANIA_02432 | ANIA_02917 | ANIA_0309…	0.000577259	0.0363994	131 / 432	131 / 2482
KEGG
KEGG pathway ID	KEGG pathway name	KEGG main category	Gene ID(s)	Exact p-value	Adjusted p-value	# genes / category	# genes / input
3050	Proteasome	Genetic Information Processing	AN1700.2 | AN1757.2 | AN1922.2 | AN2085.2 | AN2213.2 | AN2904.2 | AN2917.2 | AN3019.2 | AN3493.2 | AN3716.2 | AN3756.2 | AN3932.2 | AN4236.2 | AN4449.2 | AN4457.2 | AN4492.2 | AN4731.2 | AN4775.2 | AN4869.2 | AN5121.2 | AN5607.2 | AN5747.2 | AN5784.2 | AN5793.2 | AN5872.2 | AN6547.2 | AN6726.2 | AN6988.2 | AN7579.2 | AN8054.2	8.810713e-18	9.339355e-16	30 / 31	30 / 2482
4141	Protein processing in endoplasmic reticulum	Genetic Information Processing	AN0075.2 | AN0248.2 | AN0261.2 | AN0295.2 | AN0329.2 | AN0810.2 | AN0834.2 | AN0847.2 | AN1019.2 | AN1461.2 | AN1488.2 | AN1683.2 | AN2045.2 | AN2062.2 | AN2302.2 | AN2304.2 | AN2731.2 | AN3080.2 | AN3449.2 | AN3592.2 | AN3720.2 | AN4317.2 | AN4589.2 | AN4623.2 | AN5129.2 | AN5451.2 | AN5906.2 | AN6136.2 | AN6257.2 | AN6269.2 | AN6307.2 | AN6606.2 | AN7254.2 | AN7321.2 | AN7338.2 | AN7436.2 | AN7…	9.862934e-12	5.227355e-10	40 / 61	40 / 2482
4140	Regulation of autophagy	Cellular Processes	AN0576.2 | AN1632.2 | AN2076.2 | AN2887.2 | AN3470.2 | AN5131.2 | AN5174.2 | AN7428.2	0.00114017	0.0402862	8 / 11	8 / 2482

## Sheet: Sheet 3
Supplementary Table S4 Significantly enriched FunCat, GO and KEGG pathway terms.
Sheet 3 - DatfA mutant untreated vs. reference strain untreated
mc vs cc	down-regulated genes	DatfA mutant untreated vs. reference strain untreated
FunCat
FunCat ID	FunCat description	FunCat main category	Gene ID(s)	Exact p-value	Adjusted p-value	# genes / category	# genes / input
30.05.01.10	two-component signal transduction system (sensor kinase component)	Cellular communication / signal transduction mechanism	ANIA_01800 | ANIA_02363 | ANIA_02581 | ANIA_03101 | ANIA_03102 | ANIA_03214 | ANIA_04113 | ANIA_04447 | ANIA_04479 | ANIA_04818 | ANIA_05296 | ANIA_06820 | ANIA_07697 | ANIA_07945 | ANIA_09008 | ANIA_09048	7.370083e-9	3.97247e-06	16 / 18	16 / 2643
14.07.03	modification by phosphorylation, dephosphorylation, autophosphorylation	Protein fate (folding, modification, destination)	ANIA_00038 | ANIA_00106 | ANIA_00129 | ANIA_00137 | ANIA_00144 | ANIA_00235 | ANIA_00931 | ANIA_00988 | ANIA_01017 | ANIA_01097 | ANIA_01171 | ANIA_01545 | ANIA_01580 | ANIA_01632 | ANIA_01800 | ANIA_02067 | ANIA_02265 | ANIA_02269 | ANIA_02363 | ANIA_02425 | ANIA_02489 | ANIA_02581 | ANIA_02902 | ANIA_02943 | ANIA_03101 | ANIA_03102 | ANIA_03214 | ANIA_03434 | ANIA_03719 | ANIA_03841 | ANIA_0405…	1.873742e-7	4.28467e-05	90 / 236	90 / 2643
30.05	transmembrane signal transduction	Cellular communication / signal transduction mechanism	ANIA_00069 | ANIA_00144 | ANIA_00472 | ANIA_00931 | ANIA_01800 | ANIA_02067 | ANIA_02269 | ANIA_02363 | ANIA_02581 | ANIA_03101 | ANIA_03214 | ANIA_03435 | ANIA_03524 | ANIA_03719 | ANIA_04113 | ANIA_04173 | ANIA_04745 | ANIA_04887 | ANIA_05296 | ANIA_05492 | ANIA_06768 | ANIA_06820 | ANIA_06982 | ANIA_07698 | ANIA_07945 | ANIA_08642 | ANIA_08836 | ANIA_09008 | ANIA_09048 | ANIA_09289 | ANIA_10442	2.384791e-7	4.28467e-05	31 / 56	31 / 2643
32.01	stress response	Cell rescue, defense and virulence	ANIA_00034 | ANIA_00038 | ANIA_00106 | ANIA_00573 | ANIA_00858 | ANIA_00917 | ANIA_00931 | ANIA_01017 | ANIA_01047 | ANIA_01131 | ANIA_01158 | ANIA_01163 | ANIA_01339 | ANIA_01543 | ANIA_01545 | ANIA_01588 | ANIA_01652 | ANIA_01700 | ANIA_01731 | ANIA_01800 | ANIA_01966 | ANIA_02000 | ANIA_02238 | ANIA_02269 | ANIA_02288 | ANIA_02450 | ANIA_02646 | ANIA_02731 | ANIA_02822 | ANIA_02921 | ANIA_0294…	1.582e-06	0.000213175	97 / 270	97 / 2643
43.01.03.06	hyphae formation	Cell type differentiation	ANIA_01547 | ANIA_02009 | ANIA_02363 | ANIA_03101 | ANIA_03102 | ANIA_03214 | ANIA_03434 | ANIA_04447 | ANIA_04479 | ANIA_05296 | ANIA_06820 | ANIA_07697 | ANIA_07945	1.58938e-05	0.00171335	13 / 18	13 / 2643
40.01.03	directional cell growth (morphogenesis)	Cell fate	ANIA_00106 | ANIA_00144 | ANIA_01047 | ANIA_01800 | ANIA_02269 | ANIA_02363 | ANIA_02581 | ANIA_02984 | ANIA_03101 | ANIA_03214 | ANIA_03434 | ANIA_03435 | ANIA_04113 | ANIA_04435 | ANIA_04887 | ANIA_05296 | ANIA_05666 | ANIA_05677 | ANIA_05803 | ANIA_06508 | ANIA_07030 | ANIA_07572 | ANIA_07657 | ANIA_07783 | ANIA_07945 | ANIA_08421 | ANIA_10731 | ANIA_10792	4.36358e-05	0.00352095	28 / 59	28 / 2643
1.05	C-compound and carbohydrate metabolism	Metabolism	ANIA_00034 | ANIA_00052 | ANIA_00146 | ANIA_00235 | ANIA_00265 | ANIA_00280 | ANIA_00370 | ANIA_00377 | ANIA_00472 | ANIA_00501 | ANIA_00549 | ANIA_00593 | ANIA_00712 | ANIA_00741 | ANIA_00761 | ANIA_00775 | ANIA_00895 | ANIA_00980 | ANIA_01015 | ANIA_01059 | ANIA_01142 | ANIA_01310 | ANIA_01312 | ANIA_01396 | ANIA_01402 | ANIA_01416 | ANIA_01418 | ANIA_01428 | ANIA_01459 | ANIA_01502 | ANIA_0154…	4.57266e-05	0.00352095	264 / 922	264 / 2643
30.01.05.01	protein kinase	Cellular communication / signal transduction mechanism	ANIA_00038 | ANIA_00106 | ANIA_00988 | ANIA_01017 | ANIA_01097 | ANIA_01171 | ANIA_01632 | ANIA_02269 | ANIA_03434 | ANIA_04483 | ANIA_04544 | ANIA_04563 | ANIA_04668 | ANIA_04717 | ANIA_04887 | ANIA_04896 | ANIA_04935 | ANIA_05631 | ANIA_05666 | ANIA_05728 | ANIA_05982 | ANIA_06305 | ANIA_06347 | ANIA_07563 | ANIA_08751 | ANIA_10325 | ANIA_10731 | ANIA_10895 | ANIA_10937	6.47554e-05	0.0043629	29 / 63	29 / 2643
34.11.03.13	osmosensing and response	Interaction with the environment	ANIA_00931 | ANIA_01017 | ANIA_01558 | ANIA_01767 | ANIA_01800 | ANIA_02201 | ANIA_02269 | ANIA_02363 | ANIA_02581 | ANIA_02823 | ANIA_03101 | ANIA_03102 | ANIA_03214 | ANIA_04113 | ANIA_04114 | ANIA_04212 | ANIA_04328 | ANIA_04447 | ANIA_04479 | ANIA_04668 | ANIA_04745 | ANIA_04818 | ANIA_04887 | ANIA_05296 | ANIA_05666 | ANIA_06792 | ANIA_06820 | ANIA_06982 | ANIA_07041 | ANIA_07697 | ANIA_0769…	8.54902e-05	0.00511991	34 / 79	34 / 2643
34.11	cellular sensing and response to external stimulus	Interaction with the environment	ANIA_01502 | ANIA_02289 | ANIA_02363 | ANIA_02581 | ANIA_03101 | ANIA_03102 | ANIA_03305 | ANIA_04113 | ANIA_04479 | ANIA_04818 | ANIA_05296 | ANIA_05579 | ANIA_05653 | ANIA_06820 | ANIA_07697 | ANIA_07945 | ANIA_08603 | ANIA_08812 | ANIA_09008 | ANIA_09048 | ANIA_10494 | ANIA_10815	0.000108286	0.00583664	22 / 44	22 / 2643
30.01.05.01.06	serine/threonine kinase	Cellular communication / signal transduction mechanism	ANIA_00106 | ANIA_00931 | ANIA_00988 | ANIA_01017 | ANIA_01097 | ANIA_01632 | ANIA_02067 | ANIA_02269 | ANIA_04483 | ANIA_04536 | ANIA_04563 | ANIA_04668 | ANIA_04717 | ANIA_04887 | ANIA_04935 | ANIA_04936 | ANIA_05494 | ANIA_05674 | ANIA_05822 | ANIA_06347 | ANIA_06508 | ANIA_06768 | ANIA_07104 | ANIA_07563 | ANIA_08019 | ANIA_08751 | ANIA_08836 | ANIA_10325 | ANIA_10895 | ANIA_10937	0.000128164	0.00628002	30 / 68	30 / 2643
32.01.05	heat shock response	Cell rescue, defense and virulence	ANIA_00122 | ANIA_00858 | ANIA_01047 | ANIA_02425 | ANIA_02530 | ANIA_02731 | ANIA_03555 | ANIA_03931 | ANIA_04583 | ANIA_04674 | ANIA_05129 | ANIA_05217 | ANIA_05660 | ANIA_05781 | ANIA_05977 | ANIA_06010 | ANIA_06089 | ANIA_07892 | ANIA_08269 | ANIA_10507	0.000338609	0.014083	20 / 41	20 / 2643
20.01.13	lipid/fatty acid transport	Cellular transport, transport facilitation and transport routes	ANIA_00135 | ANIA_00929 | ANIA_01059 | ANIA_01840 | ANIA_02011 | ANIA_02043 | ANIA_02119 | ANIA_02201 | ANIA_02287 | ANIA_02342 | ANIA_02794 | ANIA_02822 | ANIA_02962 | ANIA_03304 | ANIA_03345 | ANIA_03347 | ANIA_03424 | ANIA_03952 | ANIA_04328 | ANIA_04397 | ANIA_04749 | ANIA_05192 | ANIA_05879 | ANIA_06014 | ANIA_06112 | ANIA_06614 | ANIA_06804 | ANIA_06809 | ANIA_07150 | ANIA_07286 | ANIA_0739…	0.000339664	0.014083	48 / 130	48 / 2643
01.05.25	regulation of C-compound and carbohydrate metabolism	Metabolism	ANIA_00137 | ANIA_00226 | ANIA_00931 | ANIA_01017 | ANIA_01420 | ANIA_01518 | ANIA_01652 | ANIA_01800 | ANIA_01839 | ANIA_02016 | ANIA_02130 | ANIA_02278 | ANIA_02302 | ANIA_02425 | ANIA_02466 | ANIA_02489 | ANIA_02581 | ANIA_02638 | ANIA_02919 | ANIA_03369 | ANIA_03434 | ANIA_03441 | ANIA_03445 | ANIA_03587 | ANIA_03683 | ANIA_03755 | ANIA_03835 | ANIA_03900 | ANIA_04113 | ANIA_04535 | ANIA_0455…	0.00040514	0.0155979	71 / 211	71 / 2643
36.20.18	plant hormonal regulation	Systematic interaction with the environment	ANIA_01594 | ANIA_01800 | ANIA_02363 | ANIA_02581 | ANIA_03101 | ANIA_03214 | ANIA_03704 | ANIA_04113 | ANIA_05296 | ANIA_06812 | ANIA_07945 | ANIA_09314	0.00049249	0.01757	12 / 20	12 / 2643
43.01.03.09	development of asco- basidio- or zygospore	Cell type differentiation	ANIA_00135 | ANIA_00799 | ANIA_01016 | ANIA_01046 | ANIA_01159 | ANIA_01339 | ANIA_01343 | ANIA_01546 | ANIA_01555 | ANIA_01632 | ANIA_01761 | ANIA_01800 | ANIA_01966 | ANIA_01982 | ANIA_02000 | ANIA_02363 | ANIA_02375 | ANIA_02586 | ANIA_02606 | ANIA_02706 | ANIA_02903 | ANIA_03101 | ANIA_03102 | ANIA_03214 | ANIA_03434 | ANIA_03729 | ANIA_03913 | ANIA_04208 | ANIA_04278 | ANIA_04367 | ANIA_0439…	0.000552721	0.01757	58 / 167	58 / 2643
30.01	cellular signalling	Cellular communication / signal transduction mechanism	ANIA_00069 | ANIA_00106 | ANIA_00129 | ANIA_00137 | ANIA_00144 | ANIA_00235 | ANIA_00317 | ANIA_00387 | ANIA_00463 | ANIA_00472 | ANIA_00988 | ANIA_01097 | ANIA_01133 | ANIA_01171 | ANIA_01377 | ANIA_01396 | ANIA_01632 | ANIA_01800 | ANIA_02002 | ANIA_02044 | ANIA_02066 | ANIA_02265 | ANIA_02363 | ANIA_02489 | ANIA_02943 | ANIA_03091 | ANIA_03101 | ANIA_03102 | ANIA_03214 | ANIA_03395 | ANIA_0343…	0.000554155	0.01757	84 / 260	84 / 2643
01.05.02.07	sugar, glucoside, polyol and carboxylate catabolism	Metabolism	ANIA_00377 | ANIA_00472 | ANIA_00712 | ANIA_00741 | ANIA_00854 | ANIA_01396 | ANIA_01416 | ANIA_01677 | ANIA_01715 | ANIA_01870 | ANIA_02217 | ANIA_02314 | ANIA_02388 | ANIA_02395 | ANIA_02463 | ANIA_02515 | ANIA_02801 | ANIA_02936 | ANIA_03200 | ANIA_03307 | ANIA_03308 | ANIA_03312 | ANIA_03336 | ANIA_03358 | ANIA_03368 | ANIA_03432 | ANIA_03679 | ANIA_04082 | ANIA_04102 | ANIA_04114 | ANIA_0469…	0.000674596	0.0202004	77 / 236	77 / 2643
34.01.01.01	homeostasis of metal ions (Na, K, Ca etc.)	Interaction with the environment	ANIA_00106 | ANIA_00610 | ANIA_00885 | ANIA_01290 | ANIA_01502 | ANIA_01628 | ANIA_01924 | ANIA_01950 | ANIA_02011 | ANIA_02130 | ANIA_02288 | ANIA_02827 | ANIA_02924 | ANIA_03027 | ANIA_03117 | ANIA_03160 | ANIA_03624 | ANIA_03813 | ANIA_03952 | ANIA_03961 | ANIA_04131 | ANIA_04517 | ANIA_04655 | ANIA_04749 | ANIA_04906 | ANIA_05035 | ANIA_05086 | ANIA_05088 | ANIA_05636 | ANIA_05668 | ANIA_0567…	0.000768544	0.0218024	60 / 176	60 / 2643
32.01.03	osmotic and salt stress response	Cell rescue, defense and virulence	ANIA_00799 | ANIA_01017 | ANIA_01046 | ANIA_01555 | ANIA_01558 | ANIA_01767 | ANIA_02201 | ANIA_02269 | ANIA_02581 | ANIA_02943 | ANIA_03214 | ANIA_03445 | ANIA_03688 | ANIA_04113 | ANIA_04114 | ANIA_04131 | ANIA_04328 | ANIA_04367 | ANIA_04668 | ANIA_04706 | ANIA_04818 | ANIA_04887 | ANIA_05035 | ANIA_05803 | ANIA_05977 | ANIA_06317 | ANIA_06318 | ANIA_06792 | ANIA_06820 | ANIA_07032 | ANIA_0704…	0.000900504	0.0230506	35 / 91	35 / 2643
1.04	phosphate metabolism	Metabolism	ANIA_00034 | ANIA_00038 | ANIA_00106 | ANIA_00118 | ANIA_00129 | ANIA_00144 | ANIA_00210 | ANIA_00235 | ANIA_00395 | ANIA_00646 | ANIA_00858 | ANIA_00925 | ANIA_00929 | ANIA_00931 | ANIA_00988 | ANIA_01015 | ANIA_01017 | ANIA_01097 | ANIA_01132 | ANIA_01148 | ANIA_01163 | ANIA_01171 | ANIA_01222 | ANIA_01292 | ANIA_01343 | ANIA_01414 | ANIA_01482 | ANIA_01545 | ANIA_01632 | ANIA_01800 | ANIA_0191…	0.000912162	0.0230506	148 / 505	148 / 2643
40.01.03.03	guidance of longitudinal cell extension (e.g. pollen tube guidance, axonal pathfinding)	Cell fate	ANIA_00137 | ANIA_00214 | ANIA_00750 | ANIA_01130 | ANIA_02195 | ANIA_02797 | ANIA_02994 | ANIA_03267 | ANIA_03513 | ANIA_03543 | ANIA_04706 | ANIA_05168 | ANIA_08085 | ANIA_08300 | ANIA_08767 | ANIA_09003	0.000940842	0.0230506	16 / 32	16 / 2643
42.01	cell wall	Biogenesis of cellular components	ANIA_00031 | ANIA_00106 | ANIA_00646 | ANIA_00741 | ANIA_00799 | ANIA_00925 | ANIA_00933 | ANIA_00980 | ANIA_01046 | ANIA_01158 | ANIA_01416 | ANIA_01459 | ANIA_01555 | ANIA_01558 | ANIA_01715 | ANIA_02066 | ANIA_02363 | ANIA_02706 | ANIA_02756 | ANIA_02943 | ANIA_02947 | ANIA_02984 | ANIA_03101 | ANIA_03102 | ANIA_03214 | ANIA_03307 | ANIA_03390 | ANIA_03434 | ANIA_03445 | ANIA_03729 | ANIA_0384…	0.00121834	0.0285514	78 / 244	78 / 2643
01.05.03	polysaccharide metabolism	Metabolism	ANIA_00031 | ANIA_00472 | ANIA_00549 | ANIA_00712 | ANIA_00741 | ANIA_00779 | ANIA_00799 | ANIA_01015 | ANIA_01041 | ANIA_01046 | ANIA_01416 | ANIA_01502 | ANIA_01555 | ANIA_01742 | ANIA_01852 | ANIA_01870 | ANIA_02017 | ANIA_02045 | ANIA_02314 | ANIA_02388 | ANIA_02395 | ANIA_02463 | ANIA_02936 | ANIA_02953 | ANIA_03200 | ANIA_03307 | ANIA_03308 | ANIA_03368 | ANIA_03441 | ANIA_03729 | ANIA_0379…	0.0013852	0.030903	75 / 234	75 / 2643
30.01.05.01.03	MAPKKK cascade	Cellular communication / signal transduction mechanism	ANIA_00106 | ANIA_00129 | ANIA_00931 | ANIA_01017 | ANIA_02269 | ANIA_03719 | ANIA_04278 | ANIA_04544 | ANIA_04668 | ANIA_04887 | ANIA_05666 | ANIA_06347 | ANIA_06982 | ANIA_07783 | ANIA_10251 | ANIA_10731	0.00143335	0.030903	16 / 33	16 / 2643
18.02	regulation of protein activity	Regulation of metabolism and protein function	ANIA_00106 | ANIA_00129 | ANIA_00377 | ANIA_00610 | ANIA_00931 | ANIA_00988 | ANIA_01017 | ANIA_01097 | ANIA_01545 | ANIA_01632 | ANIA_02067 | ANIA_02269 | ANIA_02902 | ANIA_04057 | ANIA_04483 | ANIA_04536 | ANIA_04563 | ANIA_04668 | ANIA_04887 | ANIA_04896 | ANIA_04935 | ANIA_04936 | ANIA_05494 | ANIA_05674 | ANIA_05822 | ANIA_06347 | ANIA_06508 | ANIA_06768 | ANIA_06982 | ANIA_07104 | ANIA_0756…	0.001501	0.0311169	37 / 100	37 / 2643
20.01.01.01	cation transport (H+, Na+, K+, Ca2+ , NH4+, etc.)	Cellular transport, transport facilitation and transport routes	ANIA_00209 | ANIA_00377 | ANIA_00610 | ANIA_01130 | ANIA_01290 | ANIA_01628 | ANIA_01839 | ANIA_02011 | ANIA_02288 | ANIA_02797 | ANIA_02827 | ANIA_03155 | ANIA_03952 | ANIA_04131 | ANIA_04173 | ANIA_04478 | ANIA_04749 | ANIA_05035 | ANIA_05083 | ANIA_05086 | ANIA_05088 | ANIA_05636 | ANIA_05668 | ANIA_05743 | ANIA_05856 | ANIA_06112 | ANIA_06127 | ANIA_06614 | ANIA_06642 | ANIA_06940 | ANIA_0698…	0.00195028	0.0386792	53 / 157	53 / 2643
30.01.05	enzyme mediated signal transduction	Cellular communication / signal transduction mechanism	ANIA_00235 | ANIA_02067 | ANIA_02581 | ANIA_02943 | ANIA_03434 | ANIA_03719 | ANIA_04113 | ANIA_04192 | ANIA_04447 | ANIA_04536 | ANIA_04818 | ANIA_05666 | ANIA_05728 | ANIA_06820 | ANIA_07563 | ANIA_07572 | ANIA_07697 | ANIA_08830 | ANIA_09008 | ANIA_09048 | ANIA_10325	0.00200931	0.0386792	21 / 49	21 / 2643
01.20.36	non-ribosomal peptide synthesis	Metabolism	ANIA_00016 | ANIA_00150 | ANIA_00607 | ANIA_01242 | ANIA_02545 | ANIA_02924 | ANIA_03496 | ANIA_07815 | ANIA_07884 | ANIA_08412 | ANIA_08433 | ANIA_09226 | ANIA_09243 | ANIA_09244 | ANIA_10297 | ANIA_10486	0.00212568	0.0395083	16 / 34	16 / 2643
20.03.22	transport ATPases	Cellular transport, transport facilitation and transport routes	ANIA_01628 | ANIA_02011 | ANIA_02342 | ANIA_02827 | ANIA_03117 | ANIA_03608 | ANIA_03624 | ANIA_03952 | ANIA_04091 | ANIA_04749 | ANIA_05083 | ANIA_05086 | ANIA_05088 | ANIA_05743 | ANIA_06112 | ANIA_06127 | ANIA_06397 | ANIA_06443 | ANIA_06614 | ANIA_06642 | ANIA_06718 | ANIA_07254 | ANIA_08219 | ANIA_08399 | ANIA_08812 | ANIA_08813 | ANIA_08864 | ANIA_08892 | ANIA_08941 | ANIA_09342 | ANIA_1030…	0.00265569	0.0477138	35 / 96	35 / 2643
GO
GO ID	GO name	GO namespace	Gene ID(s)	Exact p-value	Adjusted p-value	# genes / category	# genes / input
GO:0005575	cellular_component	CC	ANIA_00006 | ANIA_00016 | ANIA_00031 | ANIA_00048 | ANIA_00085 | ANIA_00093 | ANIA_00129 | ANIA_00136 | ANIA_00144 | ANIA_00150 | ANIA_00168 | ANIA_00172 | ANIA_00181 | ANIA_00227 | ANIA_00265 | ANIA_00282 | ANIA_00286 | ANIA_00301 | ANIA_00311 | ANIA_00313 | ANIA_00317 | ANIA_00323 | ANIA_00337 | ANIA_00353 | ANIA_00356 | ANIA_00362 | ANIA_00370 | ANIA_00377 | ANIA_00378 | ANIA_00379 | ANIA_0038…	3.593687e-16	3.881182e-13	1441 / 5098	1441 / 2643
GO:0016772	transferase activity, transferring phosphorus-containing groups	MF	ANIA_00144 | ANIA_00337 | ANIA_01097 | ANIA_01171 | ANIA_02265 | ANIA_02269 | ANIA_02363 | ANIA_03001 | ANIA_03101 | ANIA_03102 | ANIA_03214 | ANIA_04113 | ANIA_04196 | ANIA_04278 | ANIA_04447 | ANIA_04717 | ANIA_04818 | ANIA_04936 | ANIA_05190 | ANIA_05494 | ANIA_05674 | ANIA_05728 | ANIA_05822 | ANIA_06192 | ANIA_06207 | ANIA_06347 | ANIA_06508 | ANIA_06758 | ANIA_06820 | ANIA_07282 | ANIA_0756…	3.325779e-10	1.795921e-7	71 / 145	71 / 2643
GO:0023014	signal transduction by phosphorylation	BP	ANIA_02363 | ANIA_03101 | ANIA_03102 | ANIA_03214 | ANIA_04113 | ANIA_04447 | ANIA_04818 | ANIA_06820 | ANIA_09048 | ANIA_02581 | ANIA_07945 | ANIA_09008 | ANIA_04479	1.483672e-8	4.00591e-06	13 / 13	13 / 2643
GO:0000155	phosphorelay sensor kinase activity	MF	ANIA_02363 | ANIA_03101 | ANIA_03102 | ANIA_03214 | ANIA_04113 | ANIA_04447 | ANIA_04818 | ANIA_06820 | ANIA_09048 | ANIA_02581 | ANIA_07945 | ANIA_09008 | ANIA_04479	1.483672e-8	4.00591e-06	13 / 13	13 / 2643
GO:0000160	phosphorelay signal transduction system	BP	ANIA_02363 | ANIA_03101 | ANIA_03102 | ANIA_03214 | ANIA_04113 | ANIA_04447 | ANIA_04818 | ANIA_06820 | ANIA_07572 | ANIA_09048 | ANIA_02581 | ANIA_07945 | ANIA_09008 | ANIA_04479 | ANIA_03688 | ANIA_07697	2.060818e-8	4.45137e-06	16 / 18	16 / 2643
GO:0007165	signal transduction	BP	ANIA_02119 | ANIA_02363 | ANIA_02740 | ANIA_03101 | ANIA_03102 | ANIA_03214 | ANIA_04113 | ANIA_04447 | ANIA_04745 | ANIA_04818 | ANIA_04998 | ANIA_05677 | ANIA_06820 | ANIA_07572 | ANIA_08812 | ANIA_09048 | ANIA_09463 | ANIA_00106 | ANIA_01545 | ANIA_02581 | ANIA_02947 | ANIA_04536 | ANIA_07945 | ANIA_10756 | ANIA_03913 | ANIA_09008 | ANIA_01016 | ANIA_03435 | ANIA_03607 | ANIA_04479	4.185028e-8	7.53305e-06	30 / 48	30 / 2643
GO:0004672	protein kinase activity	MF	ANIA_00144 | ANIA_01097 | ANIA_01171 | ANIA_02265 | ANIA_02269 | ANIA_03001 | ANIA_03102 | ANIA_04196 | ANIA_04717 | ANIA_04936 | ANIA_05494 | ANIA_05674 | ANIA_05728 | ANIA_05822 | ANIA_06192 | ANIA_06347 | ANIA_06508 | ANIA_06758 | ANIA_07563 | ANIA_07572 | ANIA_08830 | ANIA_08836 | ANIA_09024 | ANIA_09302 | ANIA_00106 | ANIA_00235 | ANIA_00988 | ANIA_02943 | ANIA_04483 | ANIA_04536 | ANIA_0456…	1.612819e-7	2.48835e-05	48 / 97	48 / 2643
GO:0006468	protein phosphorylation	BP	ANIA_00144 | ANIA_01097 | ANIA_01171 | ANIA_02265 | ANIA_02269 | ANIA_03001 | ANIA_03102 | ANIA_04196 | ANIA_04717 | ANIA_04936 | ANIA_05494 | ANIA_05674 | ANIA_05728 | ANIA_05822 | ANIA_06192 | ANIA_06347 | ANIA_06508 | ANIA_06758 | ANIA_07563 | ANIA_07572 | ANIA_08830 | ANIA_08836 | ANIA_09024 | ANIA_09302 | ANIA_00106 | ANIA_00235 | ANIA_00988 | ANIA_01280 | ANIA_02943 | ANIA_04483 | ANIA_0453…	2.615336e-7	3.5307e-05	49 / 101	49 / 2643
GO:0004871	signal transducer activity	MF	ANIA_02363 | ANIA_03101 | ANIA_03102 | ANIA_03214 | ANIA_04113 | ANIA_04447 | ANIA_04818 | ANIA_06820 | ANIA_07572 | ANIA_09048 | ANIA_02581 | ANIA_02947 | ANIA_04536 | ANIA_07945 | ANIA_09008 | ANIA_01016 | ANIA_03435 | ANIA_03607 | ANIA_04479	2.18007e-06	0.000261609	19 / 28	19 / 2643
GO:0019829	cation-transporting ATPase activity	MF	ANIA_02011 | ANIA_02827 | ANIA_03117 | ANIA_03624 | ANIA_05088 | ANIA_06112 | ANIA_06614 | ANIA_06642 | ANIA_08219 | ANIA_08399 | ANIA_08941 | ANIA_01628 | ANIA_05743 | ANIA_08864 | ANIA_10982	1.01927e-05	0.00110082	15 / 21	15 / 2643
GO:0016301	kinase activity	MF	ANIA_00034 | ANIA_00144 | ANIA_01097 | ANIA_01171 | ANIA_02265 | ANIA_02269 | ANIA_02363 | ANIA_03001 | ANIA_03101 | ANIA_03102 | ANIA_03755 | ANIA_03916 | ANIA_04278 | ANIA_04447 | ANIA_04717 | ANIA_04818 | ANIA_04936 | ANIA_05211 | ANIA_05494 | ANIA_05589 | ANIA_05674 | ANIA_05728 | ANIA_06192 | ANIA_06207 | ANIA_06347 | ANIA_06820 | ANIA_07030 | ANIA_07563 | ANIA_07572 | ANIA_07681 | ANIA_0883…	1.22005e-05	0.00119787	63 / 155	63 / 2643
GO:0016310	phosphorylation	BP	ANIA_00034 | ANIA_00144 | ANIA_01097 | ANIA_01171 | ANIA_02265 | ANIA_02269 | ANIA_02363 | ANIA_03001 | ANIA_03101 | ANIA_03102 | ANIA_03214 | ANIA_03755 | ANIA_03916 | ANIA_04113 | ANIA_04278 | ANIA_04447 | ANIA_04717 | ANIA_04818 | ANIA_04936 | ANIA_05211 | ANIA_05494 | ANIA_05589 | ANIA_05674 | ANIA_05728 | ANIA_06192 | ANIA_06207 | ANIA_06347 | ANIA_06820 | ANIA_07030 | ANIA_07563 | ANIA_0757…	1.73764e-05	0.00156388	67 / 169	67 / 2643
GO:0006812	cation transport	BP	ANIA_01290 | ANIA_02011 | ANIA_02288 | ANIA_02827 | ANIA_03117 | ANIA_03624 | ANIA_04131 | ANIA_05035 | ANIA_05088 | ANIA_06112 | ANIA_06614 | ANIA_06642 | ANIA_08100 | ANIA_08219 | ANIA_08399 | ANIA_08791 | ANIA_08941 | ANIA_01628 | ANIA_05636 | ANIA_05743 | ANIA_08864 | ANIA_10876 | ANIA_10982	2.10181e-05	0.00174612	23 / 41	23 / 2643
GO:0004674	protein serine/threonine kinase activity	MF	ANIA_00144 | ANIA_01097 | ANIA_01171 | ANIA_02265 | ANIA_02269 | ANIA_03001 | ANIA_04717 | ANIA_04936 | ANIA_05494 | ANIA_05674 | ANIA_05728 | ANIA_05822 | ANIA_06347 | ANIA_06508 | ANIA_06758 | ANIA_07563 | ANIA_07572 | ANIA_08830 | ANIA_08836 | ANIA_00106 | ANIA_00235 | ANIA_00988 | ANIA_02943 | ANIA_04483 | ANIA_04536 | ANIA_04563 | ANIA_04887 | ANIA_04935 | ANIA_05666 | ANIA_06768 | ANIA_0697…	2.91837e-05	0.00225131	37 / 80	37 / 2643
KEGG
KEGG pathway ID	KEGG pathway name	KEGG main category	Gene ID(s)	Exact p-value	Adjusted p-value	# genes / category	# genes / input
520	Amino sugar and nucleotide sugar metabolism	Metabolism	AN1416.2 | AN1428.2 | AN1502.2 | AN1555.2 | AN1715.2 | AN2638.2 | AN2951.2 | AN4234.2 | AN4591.2 | AN5586.2 | AN6037.2 | AN6317.2 | AN6318.2 | AN6386.2 | AN7032.2 | AN7864.2 | AN8241.2 | AN8689.2 | AN9172.2	1.29892e-05	0.0013249	19 / 42	19 / 2643
4011	MAPK signaling pathway - yeast	Environmental Information Processing	AN0931.2 | AN1017.2 | AN1800.2 | AN2067.2 | AN2269.2 | AN4544.2 | AN4668.2 | AN4887.2 | AN5499.2 | AN5660.2 | AN5666.2 | AN7030.2 | AN7697.2 | AN7698.2	4.81168e-05	0.00245395	14 / 28	14 / 2643
10	Glycolysis / Gluconeogenesis	Metabolism	AN1918.2 | AN2286.2 | AN2334.2 | AN2638.2 | AN2860.2 | AN3059.2 | AN3432.2 | AN4591.2 | AN4888.2 | AN5604.2 | AN5626.2 | AN5746.2 | AN5908.2 | AN6037.2 | AN8041.2 | AN8689.2	0.000186615	0.00577411	16 / 38	16 / 2643
500	Starch and sucrose metabolism	Metabolism	AN0712.2 | AN1015.2 | AN2017.2 | AN2217.2 | AN2314.2 | AN2638.2 | AN3390.2 | AN3729.2 | AN4591.2 | AN5523.2 | AN6037.2 | AN7864.2 | AN8010.2 | AN8327.2 | AN8639.2 | AN8689.2 | AN8953.2 | AN9172.2	0.000226436	0.00577411	18 / 46	18 / 2643
564	Glycerophospholipid metabolism	Metabolism	AN0913.2 | AN0929.2 | AN1396.2 | AN1713.2 | AN2154.2 | AN2481.2 | AN3188.2 | AN5599.2 | AN5914.2 | AN6211.2 | AN6712.2 | AN6792.2 | AN7792.2 | AN8546.2	0.000435467	0.00888352	14 / 33	14 / 2643
430	Taurine and hypotaurine metabolism	Metabolism	AN4081.2 | AN4914.2 | AN5447.2 | AN7278.2 | AN7451.2	0.000694618	0.0118085	5 / 6	5 / 2643
51	Fructose and mannose metabolism	Metabolism	AN1715.2 | AN2334.2 | AN2638.2 | AN5144.2 | AN5586.2 | AN5604.2 | AN5672.2 | AN5907.2 | AN5908.2 | AN5975.2 | AN8689.2	0.00127407	0.0162444	11 / 25	11 / 2643
280	Valine, leucine and isoleucine degradation	Metabolism	AN0385.2 | AN0593.2 | AN2248.2 | AN3591.2 | AN3639.2 | AN4687.2 | AN4688.2 | AN4690.2 | AN5669.2 | AN6761.2 | AN8559.2	0.00127407	0.0162444	11 / 25	11 / 2643
561	Glycerolipid metabolism	Metabolism	AN0034.2 | AN1713.2 | AN2860.2 | AN3916.2 | AN5589.2 | AN5599.2 | AN6159.2 | AN7624.2 | AN9106.2	0.00190961	0.0216422	9 / 19	9 / 2643
680	Methane metabolism	Metabolism	AN0034.2 | AN2334.2 | AN3059.2 | AN4914.2 | AN5604.2 | AN5626.2 | AN5746.2 | AN6525.2 | AN8782.2	0.004434	0.0411152	9 / 21	9 / 2643
410	beta-Alanine metabolism	Metabolism	AN2248.2 | AN3591.2 | AN5447.2 | AN5690.2 | AN6092.2 | AN6658.2 | AN6761.2 | AN7278.2 | AN7641.2	0.004434	0.0411152	9 / 21	9 / 2643
mc vs cc	up-regulated genes	DatfA mutant untreated vs. reference strain untreated
FunCat
FunCat ID	FunCat description	FunCat main category	Gene ID(s)	Exact p-value	Adjusted p-value	# genes / category	# genes / input
12.01.01	ribosomal proteins	Protein synthesis	ANIA_00116 | ANIA_00123 | ANIA_00142 | ANIA_00204 | ANIA_00262 | ANIA_00278 | ANIA_00293 | ANIA_00421 | ANIA_00433 | ANIA_00445 | ANIA_00465 | ANIA_00470 | ANIA_00476 | ANIA_00570 | ANIA_00583 | ANIA_00637 | ANIA_00647 | ANIA_00745 | ANIA_00776 | ANIA_00843 | ANIA_00907 | ANIA_00997 | ANIA_01013 | ANIA_01095 | ANIA_01122 | ANIA_01166 | ANIA_01228 | ANIA_01256 | ANIA_01345 | ANIA_01348 | ANIA_0151…	2.574384e-69	1.413337e-66	157 / 165	157 / 2840
12.01	ribosome biogenesis	Protein synthesis	ANIA_00074 | ANIA_00116 | ANIA_00124 | ANIA_00142 | ANIA_00204 | ANIA_00262 | ANIA_00445 | ANIA_00465 | ANIA_00475 | ANIA_00570 | ANIA_00583 | ANIA_00637 | ANIA_00641 | ANIA_00647 | ANIA_00695 | ANIA_00757 | ANIA_00776 | ANIA_00843 | ANIA_00844 | ANIA_00889 | ANIA_00907 | ANIA_00946 | ANIA_01013 | ANIA_01122 | ANIA_01175 | ANIA_01215 | ANIA_01228 | ANIA_01319 | ANIA_01345 | ANIA_01348 | ANIA_0136…	8.686001e-63	2.384307e-60	158 / 173	158 / 2840
12.04	translation	Protein synthesis	ANIA_00046 | ANIA_00057 | ANIA_00116 | ANIA_00133 | ANIA_00142 | ANIA_00262 | ANIA_00278 | ANIA_00359 | ANIA_00421 | ANIA_00445 | ANIA_00465 | ANIA_00570 | ANIA_00776 | ANIA_00843 | ANIA_00936 | ANIA_01013 | ANIA_01084 | ANIA_01095 | ANIA_01122 | ANIA_01162 | ANIA_01166 | ANIA_01228 | ANIA_01270 | ANIA_01345 | ANIA_01380 | ANIA_01408 | ANIA_01430 | ANIA_01710 | ANIA_01922 | ANIA_01964 | ANIA_0205…	7.639124e-39	1.39796e-36	138 / 175	138 / 2840
11.04.01	rRNA processing	Transcription	ANIA_00074 | ANIA_00092 | ANIA_00124 | ANIA_00133 | ANIA_00189 | ANIA_00204 | ANIA_00237 | ANIA_00305 | ANIA_00327 | ANIA_00421 | ANIA_00475 | ANIA_00583 | ANIA_00589 | ANIA_00637 | ANIA_00647 | ANIA_00695 | ANIA_00745 | ANIA_00757 | ANIA_00796 | ANIA_00894 | ANIA_00944 | ANIA_01164 | ANIA_01175 | ANIA_01215 | ANIA_01260 | ANIA_01319 | ANIA_01367 | ANIA_01434 | ANIA_01474 | ANIA_01486 | ANIA_0151…	1.91592e-35	2.6296e-33	138 / 182	138 / 2840
16.03.03	RNA binding	Protein with binding function or cofactor requirement (structural or analytic)	ANIA_00057 | ANIA_00059 | ANIA_00109 | ANIA_00133 | ANIA_00161 | ANIA_00189 | ANIA_00204 | ANIA_00211 | ANIA_00262 | ANIA_00298 | ANIA_00305 | ANIA_00310 | ANIA_00359 | ANIA_00421 | ANIA_00445 | ANIA_00475 | ANIA_00570 | ANIA_00583 | ANIA_00637 | ANIA_00643 | ANIA_00647 | ANIA_00695 | ANIA_00727 | ANIA_00728 | ANIA_00745 | ANIA_00753 | ANIA_00767 | ANIA_00776 | ANIA_00796 | ANIA_00944 | ANIA_0101…	1.811198e-28	1.988695e-26	188 / 305	188 / 2840
42.16	mitochondrion	Biogenesis of cellular components	ANIA_00116 | ANIA_00123 | ANIA_00142 | ANIA_00293 | ANIA_00429 | ANIA_00470 | ANIA_00476 | ANIA_00554 | ANIA_00559 | ANIA_00686 | ANIA_00726 | ANIA_00821 | ANIA_00894 | ANIA_00997 | ANIA_01095 | ANIA_01348 | ANIA_01372 | ANIA_01770 | ANIA_01876 | ANIA_01954 | ANIA_01970 | ANIA_02057 | ANIA_02261 | ANIA_02268 | ANIA_02313 | ANIA_02900 | ANIA_02939 | ANIA_02987 | ANIA_03131 | ANIA_03173 | ANIA_0320…	5.032832e-16	4.605041e-14	98 / 156	98 / 2840
11.02.01	rRNA synthesis	Transcription	ANIA_00074 | ANIA_00095 | ANIA_00192 | ANIA_00312 | ANIA_00321 | ANIA_00421 | ANIA_00589 | ANIA_00647 | ANIA_00695 | ANIA_00745 | ANIA_00752 | ANIA_00894 | ANIA_00944 | ANIA_01272 | ANIA_01380 | ANIA_01447 | ANIA_01474 | ANIA_01485 | ANIA_01929 | ANIA_01949 | ANIA_02283 | ANIA_02415 | ANIA_02747 | ANIA_03167 | ANIA_03176 | ANIA_03313 | ANIA_03745 | ANIA_03827 | ANIA_03933 | ANIA_03944 | ANIA_0422…	1.815289e-15	1.423705e-13	55 / 71	55 / 2840
16.01	protein binding	Protein with binding function or cofactor requirement (structural or analytic)	ANIA_00059 | ANIA_00067 | ANIA_00074 | ANIA_00075 | ANIA_00081 | ANIA_00084 | ANIA_00095 | ANIA_00097 | ANIA_00109 | ANIA_00116 | ANIA_00127 | ANIA_00140 | ANIA_00142 | ANIA_00154 | ANIA_00163 | ANIA_00164 | ANIA_00182 | ANIA_00190 | ANIA_00192 | ANIA_00211 | ANIA_00228 | ANIA_00241 | ANIA_00262 | ANIA_00278 | ANIA_00290 | ANIA_00292 | ANIA_00293 | ANIA_00306 | ANIA_00310 | ANIA_00316 | ANIA_0032…	2.721024e-15	1.867303e-13	581 / 1448	581 / 2840
02.13.03	aerobic respiration	Energy	ANIA_00252 | ANIA_00357 | ANIA_00432 | ANIA_00747 | ANIA_01063 | ANIA_01104 | ANIA_01444 | ANIA_01469 | ANIA_01523 | ANIA_01624 | ANIA_01722 | ANIA_01743 | ANIA_01915 | ANIA_01954 | ANIA_02260 | ANIA_02306 | ANIA_02315 | ANIA_02316 | ANIA_02414 | ANIA_02900 | ANIA_03011 | ANIA_03034 | ANIA_03131 | ANIA_03467 | ANIA_03738 | ANIA_04064 | ANIA_04288 | ANIA_04297 | ANIA_04388 | ANIA_04402 | ANIA_0446…	1.300526e-11	7.933206e-10	61 / 93	61 / 2840
02.11.05	accessory proteins of electron transport and membrane-associated energy conservation	Energy	ANIA_00357 | ANIA_00747 | ANIA_01063 | ANIA_01104 | ANIA_01366 | ANIA_01722 | ANIA_02069 | ANIA_02260 | ANIA_02306 | ANIA_02414 | ANIA_03131 | ANIA_04288 | ANIA_04297 | ANIA_04388 | ANIA_04977 | ANIA_05629 | ANIA_05703 | ANIA_06077 | ANIA_06255 | ANIA_06272 | ANIA_06297 | ANIA_06557 | ANIA_06699 | ANIA_06976 | ANIA_07450 | ANIA_07497 | ANIA_08049 | ANIA_08118 | ANIA_08273 | ANIA_08763 | ANIA_1022…	5.546058e-10	3.044786e-8	34 / 44	34 / 2840
11.04.03.01	splicing	Transcription	ANIA_00109 | ANIA_00133 | ANIA_00161 | ANIA_00211 | ANIA_00298 | ANIA_00310 | ANIA_00380 | ANIA_00583 | ANIA_00637 | ANIA_00695 | ANIA_00714 | ANIA_00727 | ANIA_00745 | ANIA_00767 | ANIA_00894 | ANIA_00944 | ANIA_01208 | ANIA_01249 | ANIA_01259 | ANIA_01260 | ANIA_01319 | ANIA_01408 | ANIA_01413 | ANIA_01468 | ANIA_01495 | ANIA_01634 | ANIA_01709 | ANIA_01750 | ANIA_01776 | ANIA_01802 | ANIA_0195…	3.464046e-9	1.728874e-7	103 / 201	103 / 2840
12.1	aminoacyl-tRNA-synthetases	Protein synthesis	ANIA_00046 | ANIA_00057 | ANIA_00428 | ANIA_00936 | ANIA_01201 | ANIA_01380 | ANIA_01709 | ANIA_01710 | ANIA_01913 | ANIA_02150 | ANIA_02246 | ANIA_03073 | ANIA_03702 | ANIA_03824 | ANIA_03865 | ANIA_04086 | ANIA_04550 | ANIA_04584 | ANIA_05662 | ANIA_05738 | ANIA_06253 | ANIA_06368 | ANIA_06526 | ANIA_07361 | ANIA_07479 | ANIA_08224 | ANIA_08800 | ANIA_10353 | ANIA_10393 | ANIA_10474 | ANIA_11125	8.264007e-9	3.780783e-7	31 / 41	31 / 2840
11.06.01	rRNA modification	Transcription	ANIA_00092 | ANIA_00647 | ANIA_00695 | ANIA_00745 | ANIA_01751 | ANIA_01957 | ANIA_03167 | ANIA_03313 | ANIA_04226 | ANIA_04298 | ANIA_04456 | ANIA_05340 | ANIA_06171 | ANIA_08254 | ANIA_08834 | ANIA_08851 | ANIA_10352 | ANIA_10712	1.272403e-8	5.373456e-7	18 / 19	18 / 2840
16.19.05	GTP binding	Protein with binding function or cofactor requirement (structural or analytic)	ANIA_00081 | ANIA_00089 | ANIA_00182 | ANIA_00259 | ANIA_00316 | ANIA_00347 | ANIA_00411 | ANIA_00634 | ANIA_00651 | ANIA_00692 | ANIA_00889 | ANIA_00893 | ANIA_01084 | ANIA_01162 | ANIA_01182 | ANIA_01215 | ANIA_01223 | ANIA_01394 | ANIA_01408 | ANIA_01666 | ANIA_02080 | ANIA_02223 | ANIA_02244 | ANIA_02263 | ANIA_02295 | ANIA_02438 | ANIA_03090 | ANIA_03598 | ANIA_03832 | ANIA_04038 | ANIA_0416…	1.66906e-8	6.545099e-7	64 / 112	64 / 2840
01.03.04	pyrimidine nucleotide/nucleoside/nucleobase metabolism	Metabolism	ANIA_00072 | ANIA_00259 | ANIA_00271 | ANIA_00474 | ANIA_00490 | ANIA_00565 | ANIA_00984 | ANIA_01082 | ANIA_01498 | ANIA_01524 | ANIA_01823 | ANIA_01965 | ANIA_02243 | ANIA_02967 | ANIA_03169 | ANIA_03170 | ANIA_03809 | ANIA_04258 | ANIA_05884 | ANIA_05888 | ANIA_05999 | ANIA_06157 | ANIA_06165 | ANIA_06325 | ANIA_06711 | ANIA_06993 | ANIA_07028 | ANIA_07429 | ANIA_07502 | ANIA_08213 | ANIA_0821…	1.941442e-8	7.105679e-7	43 / 66	43 / 2840
12.04.01	translation initiation	Protein synthesis	ANIA_00359 | ANIA_00944 | ANIA_00978 | ANIA_01083 | ANIA_01256 | ANIA_01270 | ANIA_02246 | ANIA_02775 | ANIA_02907 | ANIA_02932 | ANIA_02992 | ANIA_02997 | ANIA_03055 | ANIA_03156 | ANIA_03411 | ANIA_04000 | ANIA_04015 | ANIA_04038 | ANIA_04470 | ANIA_05121 | ANIA_05738 | ANIA_05954 | ANIA_06651 | ANIA_06700 | ANIA_06707 | ANIA_06864 | ANIA_07105 | ANIA_07350 | ANIA_07540 | ANIA_08016 | ANIA_0806…	2.303125e-8	7.902598e-7	40 / 60	40 / 2840
11.04.02	tRNA processing	Transcription	ANIA_00072 | ANIA_00141 | ANIA_00189 | ANIA_00190 | ANIA_00285 | ANIA_00583 | ANIA_00818 | ANIA_00956 | ANIA_00984 | ANIA_01045 | ANIA_01474 | ANIA_01486 | ANIA_01750 | ANIA_02437 | ANIA_02508 | ANIA_02735 | ANIA_02967 | ANIA_03010 | ANIA_03170 | ANIA_04067 | ANIA_04862 | ANIA_05694 | ANIA_05931 | ANIA_06006 | ANIA_06149 | ANIA_06165 | ANIA_06707 | ANIA_07424 | ANIA_08066 | ANIA_08787 | ANIA_0879…	2.582042e-8	8.164635e-7	35 / 50	35 / 2840
20.09.04	mitochondrial transport	Cellular transport, transport facilitation and transport routes	ANIA_00066 | ANIA_00252 | ANIA_00257 | ANIA_00346 | ANIA_00429 | ANIA_00559 | ANIA_00870 | ANIA_01105 | ANIA_01281 | ANIA_01372 | ANIA_01523 | ANIA_01534 | ANIA_01795 | ANIA_01892 | ANIA_02173 | ANIA_02315 | ANIA_02939 | ANIA_03461 | ANIA_03663 | ANIA_03690 | ANIA_04064 | ANIA_04068 | ANIA_04250 | ANIA_04402 | ANIA_04490 | ANIA_04559 | ANIA_05132 | ANIA_05356 | ANIA_05528 | ANIA_05693 | ANIA_0580…	2.67693e-8	8.164635e-7	64 / 113	64 / 2840
11.06.02	tRNA modification	Transcription	ANIA_00072 | ANIA_00130 | ANIA_00141 | ANIA_00757 | ANIA_00804 | ANIA_00818 | ANIA_00956 | ANIA_00984 | ANIA_01474 | ANIA_01751 | ANIA_02735 | ANIA_02900 | ANIA_02967 | ANIA_03010 | ANIA_03170 | ANIA_04584 | ANIA_05738 | ANIA_06165 | ANIA_06522 | ANIA_06577 | ANIA_07028 | ANIA_08066 | ANIA_08799 | ANIA_09406 | ANIA_10361 | ANIA_10450 | ANIA_10451 | ANIA_10474 | ANIA_10721 | ANIA_10936	5.213977e-8	1.50656e-06	30 / 41	30 / 2840
14.1	assembly of protein complexes	Protein fate (folding, modification, destination)	ANIA_00081 | ANIA_00140 | ANIA_00306 | ANIA_00316 | ANIA_00637 | ANIA_00673 | ANIA_00686 | ANIA_00722 | ANIA_00727 | ANIA_00757 | ANIA_00770 | ANIA_00905 | ANIA_00927 | ANIA_01023 | ANIA_01195 | ANIA_01230 | ANIA_01259 | ANIA_01306 | ANIA_01387 | ANIA_01394 | ANIA_01454 | ANIA_01468 | ANIA_01495 | ANIA_01668 | ANIA_01722 | ANIA_01915 | ANIA_02062 | ANIA_02105 | ANIA_02900 | ANIA_02975 | ANIA_0302…	1.318675e-7	3.61976e-06	117 / 248	117 / 2840
02.45.15	energy generation (e.g. ATP synthase)	Energy	ANIA_00110 | ANIA_00252 | ANIA_00357 | ANIA_00943 | ANIA_01195 | ANIA_01523 | ANIA_01534 | ANIA_01624 | ANIA_02294 | ANIA_02315 | ANIA_03168 | ANIA_05880 | ANIA_06287 | ANIA_06631 | ANIA_07603 | ANIA_10032 | ANIA_11303 | ANIA_11444 | ANIA_11565	1.595484e-7	4.17105e-06	19 / 22	19 / 2840
11.02.03	mRNA synthesis	Transcription	ANIA_00133 | ANIA_00204 | ANIA_00242 | ANIA_00327 | ANIA_00637 | ANIA_00727 | ANIA_00745 | ANIA_01256 | ANIA_01260 | ANIA_01319 | ANIA_01340 | ANIA_01408 | ANIA_01495 | ANIA_01517 | ANIA_01709 | ANIA_01802 | ANIA_01949 | ANIA_01951 | ANIA_02007 | ANIA_02020 | ANIA_02105 | ANIA_02457 | ANIA_02747 | ANIA_02907 | ANIA_03176 | ANIA_04032 | ANIA_04219 | ANIA_04269 | ANIA_04456 | ANIA_04584 | ANIA_0478…	2.02782e-06	5.06032e-05	58 / 109	58 / 2840
11.02.02	tRNA synthesis	Transcription	ANIA_00072 | ANIA_00192 | ANIA_00321 | ANIA_00752 | ANIA_00936 | ANIA_01045 | ANIA_01272 | ANIA_01447 | ANIA_01485 | ANIA_01486 | ANIA_02415 | ANIA_02508 | ANIA_02747 | ANIA_03170 | ANIA_03933 | ANIA_04219 | ANIA_04269 | ANIA_04499 | ANIA_05662 | ANIA_05738 | ANIA_06252 | ANIA_06558 | ANIA_06575 | ANIA_08224 | ANIA_08272 | ANIA_09125 | ANIA_09406 | ANIA_10316 | ANIA_10546 | ANIA_11183 | ANIA_11406	2.53246e-06	6.04487e-05	31 / 48	31 / 2840
14.01	protein folding and stabilization	Protein fate (folding, modification, destination)	ANIA_00059 | ANIA_00075 | ANIA_00084 | ANIA_00241 | ANIA_00380 | ANIA_00381 | ANIA_00590 | ANIA_00834 | ANIA_00847 | ANIA_00862 | ANIA_01205 | ANIA_01282 | ANIA_01469 | ANIA_01639 | ANIA_01851 | ANIA_01904 | ANIA_02062 | ANIA_02149 | ANIA_02164 | ANIA_02453 | ANIA_02918 | ANIA_03060 | ANIA_03070 | ANIA_03134 | ANIA_03139 | ANIA_03375 | ANIA_03463 | ANIA_03592 | ANIA_03598 | ANIA_03673 | ANIA_0403…	3.47497e-06	7.94899e-05	64 / 125	64 / 2840
16.21.08	Fe/S binding	Protein with binding function or cofactor requirement (structural or analytic)	ANIA_00502 | ANIA_00747 | ANIA_01063 | ANIA_01104 | ANIA_02294 | ANIA_02306 | ANIA_02414 | ANIA_03894 | ANIA_04288 | ANIA_04297 | ANIA_04388 | ANIA_04977 | ANIA_05111 | ANIA_05629 | ANIA_05703 | ANIA_06077 | ANIA_06557 | ANIA_07497 | ANIA_08049 | ANIA_08273 | ANIA_08763 | ANIA_09093 | ANIA_09486 | ANIA_10229 | ANIA_10440 | ANIA_10978	6.96336e-06	0.000152915	26 / 39	26 / 2840
01.03.16.01	RNA degradation	Metabolism	ANIA_00767 | ANIA_01256 | ANIA_01387 | ANIA_01486 | ANIA_01723 | ANIA_02080 | ANIA_02185 | ANIA_02457 | ANIA_02734 | ANIA_02896 | ANIA_03014 | ANIA_03657 | ANIA_03812 | ANIA_04617 | ANIA_05188 | ANIA_05482 | ANIA_05694 | ANIA_05931 | ANIA_06111 | ANIA_06149 | ANIA_06244 | ANIA_06893 | ANIA_06902 | ANIA_07424 | ANIA_07492 | ANIA_07550 | ANIA_07566 | ANIA_07628 | ANIA_07665 | ANIA_07746 | ANIA_0915…	2.67411e-05	0.000564649	35 / 61	35 / 2840
01.03.01.03	purine nucleotide/nucleoside/nucleobase anabolism	Metabolism	ANIA_00110 | ANIA_00495 | ANIA_00893 | ANIA_01195 | ANIA_01524 | ANIA_01965 | ANIA_03168 | ANIA_03169 | ANIA_03626 | ANIA_04011 | ANIA_04464 | ANIA_04739 | ANIA_05566 | ANIA_06209 | ANIA_06711 | ANIA_06993 | ANIA_07430 | ANIA_08216 | ANIA_09083 | ANIA_10753 | ANIA_10837	3.78076e-05	0.000768755	21 / 31	21 / 2840
34.05	cell motility	Interaction with the environment	ANIA_00057 | ANIA_00140 | ANIA_00290 | ANIA_00306 | ANIA_00316 | ANIA_00673 | ANIA_00999 | ANIA_01454 | ANIA_02126 | ANIA_02972 | ANIA_04664 | ANIA_05020 | ANIA_05082 | ANIA_05778 | ANIA_07441 | ANIA_07626 | ANIA_08065 | ANIA_08182 | ANIA_08698 | ANIA_10474 | ANIA_10627	7.73133e-05	0.00151589	21 / 32	21 / 2840
14.07.02.02	N-directed glycosylation, deglycosylation	Protein fate (folding, modification, destination)	ANIA_00086 | ANIA_00104 | ANIA_01048 | ANIA_01455 | ANIA_01683 | ANIA_02626 | ANIA_04031 | ANIA_04683 | ANIA_04864 | ANIA_04947 | ANIA_05788 | ANIA_05888 | ANIA_05902 | ANIA_06170 | ANIA_06606 | ANIA_06610 | ANIA_06874 | ANIA_07301 | ANIA_07472 | ANIA_07534 | ANIA_07715 | ANIA_08119 | ANIA_08848 | ANIA_10118 | ANIA_10702 | ANIA_10710	8.70466e-05	0.00163361	26 / 43	26 / 2840
12.04.02	translation elongation	Protein synthesis	ANIA_01084 | ANIA_01162 | ANIA_01408 | ANIA_02223 | ANIA_02734 | ANIA_02759 | ANIA_03832 | ANIA_04218 | ANIA_04308 | ANIA_05719 | ANIA_05996 | ANIA_06302 | ANIA_06563 | ANIA_06651 | ANIA_06700 | ANIA_08256 | ANIA_10315 | ANIA_10734	8.92682e-05	0.00163361	18 / 26	18 / 2840
14.04	protein targeting, sorting and translocation	Protein fate (folding, modification, destination)	ANIA_00084 | ANIA_00127 | ANIA_00131 | ANIA_00417 | ANIA_00429 | ANIA_00559 | ANIA_00643 | ANIA_00722 | ANIA_00770 | ANIA_00834 | ANIA_00847 | ANIA_00926 | ANIA_01023 | ANIA_01064 | ANIA_01105 | ANIA_01190 | ANIA_01205 | ANIA_01223 | ANIA_01229 | ANIA_01281 | ANIA_01341 | ANIA_01442 | ANIA_01454 | ANIA_01565 | ANIA_01775 | ANIA_01845 | ANIA_01892 | ANIA_01988 | ANIA_02014 | ANIA_02048 | ANIA_0206…	0.000111791	0.00197978	121 / 289	121 / 2840
11.04.03	mRNA processing (splicing, 5'-, 3'-end processing)	Transcription	ANIA_00109 | ANIA_00133 | ANIA_00190 | ANIA_00211 | ANIA_00298 | ANIA_00310 | ANIA_00380 | ANIA_00421 | ANIA_00583 | ANIA_00637 | ANIA_00727 | ANIA_00767 | ANIA_01208 | ANIA_01249 | ANIA_01256 | ANIA_01259 | ANIA_01260 | ANIA_01340 | ANIA_01408 | ANIA_01413 | ANIA_01517 | ANIA_01750 | ANIA_02007 | ANIA_02433 | ANIA_02751 | ANIA_02932 | ANIA_02961 | ANIA_03427 | ANIA_03651 | ANIA_04000 | ANIA_0409…	0.000205849	0.00353159	63 / 136	63 / 2840
16.03	nucleic acid binding	Protein with binding function or cofactor requirement (structural or analytic)	ANIA_00059 | ANIA_00109 | ANIA_00133 | ANIA_00182 | ANIA_00204 | ANIA_00298 | ANIA_00359 | ANIA_00583 | ANIA_00589 | ANIA_00637 | ANIA_00714 | ANIA_00782 | ANIA_00818 | ANIA_00894 | ANIA_00897 | ANIA_01340 | ANIA_01413 | ANIA_01452 | ANIA_01710 | ANIA_01750 | ANIA_01875 | ANIA_01949 | ANIA_02185 | ANIA_02748 | ANIA_02775 | ANIA_02932 | ANIA_02973 | ANIA_03073 | ANIA_03096 | ANIA_03144 | ANIA_0317…	0.000230179	0.00382934	75 / 168	75 / 2840
20.01.10	protein transport	Cellular transport, transport facilitation and transport routes	ANIA_00089 | ANIA_00131 | ANIA_00257 | ANIA_00347 | ANIA_00411 | ANIA_00417 | ANIA_00429 | ANIA_00559 | ANIA_00634 | ANIA_00643 | ANIA_00665 | ANIA_00770 | ANIA_00834 | ANIA_00847 | ANIA_00926 | ANIA_01064 | ANIA_01105 | ANIA_01154 | ANIA_01190 | ANIA_01281 | ANIA_01341 | ANIA_01372 | ANIA_01442 | ANIA_01892 | ANIA_01988 | ANIA_02014 | ANIA_02048 | ANIA_02120 | ANIA_02142 | ANIA_02164 | ANIA_0222…	0.00026295	0.00424587	93 / 217	93 / 2840
2.11	electron transport and membrane-associated energy conservation	Energy	ANIA_00110 | ANIA_00252 | ANIA_00357 | ANIA_00432 | ANIA_00747 | ANIA_00824 | ANIA_00943 | ANIA_01063 | ANIA_01195 | ANIA_01444 | ANIA_01523 | ANIA_01534 | ANIA_01624 | ANIA_02294 | ANIA_02306 | ANIA_02315 | ANIA_02316 | ANIA_02414 | ANIA_02682 | ANIA_03168 | ANIA_03205 | ANIA_03467 | ANIA_04288 | ANIA_04297 | ANIA_04300 | ANIA_04388 | ANIA_05629 | ANIA_05670 | ANIA_05703 | ANIA_05704 | ANIA_0597…	0.000287425	0.00450847	54 / 114	54 / 2840
30.01.05.05	G-protein mediated signal transduction	Cellular communication / signal transduction mechanism	ANIA_00089 | ANIA_00163 | ANIA_00305 | ANIA_00411 | ANIA_00634 | ANIA_00651 | ANIA_01661 | ANIA_03090 | ANIA_03746 | ANIA_03926 | ANIA_04163 | ANIA_04281 | ANIA_04685 | ANIA_04782 | ANIA_04862 | ANIA_04953 | ANIA_05020 | ANIA_05893 | ANIA_06627 | ANIA_07487 | ANIA_07602 | ANIA_08868 | ANIA_09085 | ANIA_10315 | ANIA_10355	0.000732076	0.0111642	25 / 45	25 / 2840
1.03	nucleotide/nucleoside/nucleobase metabolism	Metabolism	ANIA_00259 | ANIA_00321 | ANIA_00490 | ANIA_01194 | ANIA_01447 | ANIA_01750 | ANIA_01823 | ANIA_02415 | ANIA_02973 | ANIA_03035 | ANIA_03933 | ANIA_04064 | ANIA_04219 | ANIA_04233 | ANIA_04258 | ANIA_04464 | ANIA_04903 | ANIA_05122 | ANIA_05210 | ANIA_05493 | ANIA_05694 | ANIA_05801 | ANIA_05884 | ANIA_06157 | ANIA_06496 | ANIA_06783 | ANIA_07028 | ANIA_07550 | ANIA_07748 | ANIA_07967 | ANIA_0820…	0.000929277	0.0137885	43 / 90	43 / 2840
16.07	structural protein binding	Protein with binding function or cofactor requirement (structural or analytic)	ANIA_00140 | ANIA_00306 | ANIA_00316 | ANIA_00673 | ANIA_00943 | ANIA_01064 | ANIA_01182 | ANIA_01534 | ANIA_01922 | ANIA_01953 | ANIA_02050 | ANIA_02086 | ANIA_02439 | ANIA_02734 | ANIA_03029 | ANIA_04317 | ANIA_04499 | ANIA_04919 | ANIA_05007 | ANIA_05082 | ANIA_05778 | ANIA_06287 | ANIA_06631 | ANIA_06838 | ANIA_07009 | ANIA_07441 | ANIA_08065 | ANIA_08698 | ANIA_10519 | ANIA_10627 | ANIA_10754	0.00134315	0.019405	31 / 61	31 / 2840
2.13	respiration	Energy	ANIA_00252 | ANIA_00346 | ANIA_00357 | ANIA_00432 | ANIA_00554 | ANIA_00726 | ANIA_00943 | ANIA_01523 | ANIA_01534 | ANIA_01624 | ANIA_01915 | ANIA_02069 | ANIA_02306 | ANIA_02315 | ANIA_03843 | ANIA_03922 | ANIA_04297 | ANIA_04863 | ANIA_04977 | ANIA_05670 | ANIA_05971 | ANIA_06287 | ANIA_06572 | ANIA_06631 | ANIA_06699 | ANIA_06772 | ANIA_07141 | ANIA_07489 | ANIA_08118 | ANIA_08229 | ANIA_0874…	0.00161595	0.0227476	43 / 92	43 / 2840
01.03.04.03	pyrimidine nucleotide/nucleoside/nucleobase anabolism	Metabolism	ANIA_00474 | ANIA_00490 | ANIA_01965 | ANIA_03169 | ANIA_04075 | ANIA_04258 | ANIA_05884 | ANIA_06157 | ANIA_06711 | ANIA_07028 | ANIA_07189 | ANIA_07502 | ANIA_08213 | ANIA_08216 | ANIA_08869	0.00176753	0.0242593	15 / 24	15 / 2840
01.03.01	purin nucleotide/nucleoside/nucleobase metabolism	Metabolism	ANIA_00081 | ANIA_00200 | ANIA_00259 | ANIA_00316 | ANIA_00347 | ANIA_00495 | ANIA_00634 | ANIA_00653 | ANIA_00893 | ANIA_01082 | ANIA_01103 | ANIA_01194 | ANIA_01408 | ANIA_01524 | ANIA_01769 | ANIA_01965 | ANIA_03104 | ANIA_03169 | ANIA_03626 | ANIA_03748 | ANIA_03779 | ANIA_04011 | ANIA_04075 | ANIA_04258 | ANIA_04464 | ANIA_04685 | ANIA_04739 | ANIA_04769 | ANIA_04782 | ANIA_04915 | ANIA_0494…	0.00209885	0.0281041	54 / 122	54 / 2840
20.09.05	non-vesicular ER transport	Cellular transport, transport facilitation and transport routes	ANIA_00417 | ANIA_00834 | ANIA_01442 | ANIA_02062 | ANIA_04589 | ANIA_04616 | ANIA_06627 | ANIA_07721	0.00231857	0.0296023	8 / 10	8 / 2840
01.02.03.01	sulfate assimilation	Metabolism	ANIA_01194 | ANIA_01752 | ANIA_01769 | ANIA_04769 | ANIA_04774 | ANIA_06710 | ANIA_07034 | ANIA_07600	0.00231857	0.0296023	8 / 10	8 / 2840
32.01.07	unfolded protein response (e.g. ER quality control)	Cell rescue, defense and virulence	ANIA_00381 | ANIA_00429 | ANIA_00847 | ANIA_01282 | ANIA_01845 | ANIA_01851 | ANIA_01904 | ANIA_02062 | ANIA_02149 | ANIA_02246 | ANIA_02918 | ANIA_03070 | ANIA_03134 | ANIA_03463 | ANIA_03592 | ANIA_03758 | ANIA_04559 | ANIA_04616 | ANIA_04731 | ANIA_04753 | ANIA_05438 | ANIA_05713 | ANIA_05785 | ANIA_05954 | ANIA_06170 | ANIA_06248 | ANIA_06593 | ANIA_06630 | ANIA_07143 | ANIA_07649 | ANIA_0825…	0.00249749	0.0305357	35 / 73	35 / 2840
01.05.13.03	tetrahydrofolate-dependent C-1-transfer	Metabolism	ANIA_01524 | ANIA_04384 | ANIA_04464 | ANIA_04776 | ANIA_05738 | ANIA_07028 | ANIA_07324 | ANIA_08215 | ANIA_10012 | ANIA_10745 | ANIA_10753	0.00250293	0.0305357	11 / 16	11 / 2840
01.05.13	transfer of activated C-1 groups	Metabolism	ANIA_00092 | ANIA_00130 | ANIA_00182 | ANIA_00625 | ANIA_00720 | ANIA_00745 | ANIA_01430 | ANIA_01445 | ANIA_01751 | ANIA_02104 | ANIA_03010 | ANIA_03096 | ANIA_03313 | ANIA_04685 | ANIA_05789 | ANIA_05867 | ANIA_05871 | ANIA_07028 | ANIA_08721 | ANIA_08799 | ANIA_09406 | ANIA_09438 | ANIA_10361 | ANIA_10450 | ANIA_10451 | ANIA_10526	0.00303218	0.0361885	26 / 51	26 / 2840
14.07.11	protein processing (proteolytic)	Protein fate (folding, modification, destination)	ANIA_00747 | ANIA_01104 | ANIA_01209 | ANIA_01372 | ANIA_01757 | ANIA_01922 | ANIA_02085 | ANIA_02129 | ANIA_02213 | ANIA_02240 | ANIA_02972 | ANIA_03019 | ANIA_03583 | ANIA_03756 | ANIA_03867 | ANIA_04404 | ANIA_04449 | ANIA_04492 | ANIA_04869 | ANIA_05121 | ANIA_05199 | ANIA_05747 | ANIA_05784 | ANIA_05793 | ANIA_05872 | ANIA_06528 | ANIA_06547 | ANIA_06726 | ANIA_06841 | ANIA_07159 | ANIA_0757…	0.00377042	0.0440417	44 / 98	44 / 2840
GO
GO ID	GO name	GO namespace	Gene ID(s)	Exact p-value	Adjusted p-value	# genes / category	# genes / input
GO:0005840	ribosome	CC	ANIA_00116 | ANIA_00123 | ANIA_00142 | ANIA_00445 | ANIA_00465 | ANIA_00476 | ANIA_00570 | ANIA_00776 | ANIA_00907 | ANIA_01013 | ANIA_01095 | ANIA_01228 | ANIA_01345 | ANIA_01348 | ANIA_01636 | ANIA_01770 | ANIA_01954 | ANIA_01964 | ANIA_01970 | ANIA_02057 | ANIA_02734 | ANIA_02980 | ANIA_03173 | ANIA_03413 | ANIA_03595 | ANIA_03649 | ANIA_03744 | ANIA_03823 | ANIA_04073 | ANIA_04087 | ANIA_0422…	7.853996e-69	1.116838e-65	118 / 119	118 / 2840
GO:0006412	translation	BP	ANIA_00116 | ANIA_00123 | ANIA_00142 | ANIA_00428 | ANIA_00445 | ANIA_00465 | ANIA_00570 | ANIA_00776 | ANIA_00907 | ANIA_01013 | ANIA_01095 | ANIA_01162 | ANIA_01228 | ANIA_01345 | ANIA_01348 | ANIA_01393 | ANIA_01770 | ANIA_01964 | ANIA_01970 | ANIA_02057 | ANIA_02775 | ANIA_02980 | ANIA_03173 | ANIA_03411 | ANIA_03413 | ANIA_03649 | ANIA_03823 | ANIA_04073 | ANIA_04087 | ANIA_04222 | ANIA_0430…	1.86307e-62	1.324643e-59	119 / 125	119 / 2840
GO:0003735	structural constituent of ribosome	MF	ANIA_00116 | ANIA_00123 | ANIA_00142 | ANIA_00445 | ANIA_00465 | ANIA_00570 | ANIA_00776 | ANIA_00907 | ANIA_01013 | ANIA_01095 | ANIA_01228 | ANIA_01345 | ANIA_01348 | ANIA_01393 | ANIA_01770 | ANIA_01964 | ANIA_01970 | ANIA_02057 | ANIA_02734 | ANIA_02980 | ANIA_03173 | ANIA_03413 | ANIA_03649 | ANIA_03823 | ANIA_04073 | ANIA_04087 | ANIA_04222 | ANIA_04308 | ANIA_04452 | ANIA_04475 | ANIA_0452…	2.800863e-59	1.327609e-56	102 / 103	102 / 2840
GO:0030529	ribonucleoprotein complex	CC	ANIA_00109 | ANIA_00116 | ANIA_00142 | ANIA_00305 | ANIA_00445 | ANIA_00465 | ANIA_00475 | ANIA_00695 | ANIA_00727 | ANIA_00767 | ANIA_00776 | ANIA_00907 | ANIA_01045 | ANIA_01095 | ANIA_01119 | ANIA_01319 | ANIA_01345 | ANIA_01348 | ANIA_01495 | ANIA_01770 | ANIA_01964 | ANIA_01983 | ANIA_02007 | ANIA_02105 | ANIA_02734 | ANIA_03173 | ANIA_03413 | ANIA_03794 | ANIA_03823 | ANIA_04073 | ANIA_0408…	2.583323e-50	9.183713e-48	94 / 98	94 / 2840
GO:0005622	intracellular	CC	ANIA_00123 | ANIA_00445 | ANIA_00465 | ANIA_00570 | ANIA_00776 | ANIA_00834 | ANIA_00927 | ANIA_01013 | ANIA_01228 | ANIA_01345 | ANIA_01348 | ANIA_01429 | ANIA_01770 | ANIA_01964 | ANIA_01970 | ANIA_02057 | ANIA_02062 | ANIA_02147 | ANIA_02734 | ANIA_02980 | ANIA_03173 | ANIA_03649 | ANIA_03746 | ANIA_03823 | ANIA_03864 | ANIA_03987 | ANIA_04073 | ANIA_04087 | ANIA_04163 | ANIA_04178 | ANIA_0422…	4.626351e-31	1.315734e-28	134 / 211	134 / 2840
GO:0019013	viral nucleocapsid	CC	ANIA_00109 | ANIA_00305 | ANIA_00475 | ANIA_00695 | ANIA_00727 | ANIA_00767 | ANIA_01119 | ANIA_01495 | ANIA_01983 | ANIA_02007 | ANIA_02105 | ANIA_03794 | ANIA_04456 | ANIA_04460 | ANIA_04648 | ANIA_05340 | ANIA_06171 | ANIA_06199 | ANIA_06265 | ANIA_06676 | ANIA_07458 | ANIA_00647 | ANIA_01802 | ANIA_04226 | ANIA_04298 | ANIA_05779 | ANIA_06735 | ANIA_08183 | ANIA_10007 | ANIA_10561 | ANIA_1084…	1.216507e-16	2.883121e-14	33 / 36	33 / 2840
GO:0005737	cytoplasm	CC	ANIA_00057 | ANIA_00114 | ANIA_00130 | ANIA_00163 | ANIA_00381 | ANIA_00428 | ANIA_00912 | ANIA_00936 | ANIA_01009 | ANIA_01370 | ANIA_01380 | ANIA_01709 | ANIA_01757 | ANIA_01823 | ANIA_01851 | ANIA_01913 | ANIA_01968 | ANIA_02085 | ANIA_02150 | ANIA_02213 | ANIA_02748 | ANIA_03056 | ANIA_03070 | ANIA_03112 | ANIA_03134 | ANIA_03411 | ANIA_03702 | ANIA_03756 | ANIA_03823 | ANIA_03824 | ANIA_0425…	8.532743e-16	1.733366e-13	102 / 193	102 / 2840
GO:0003723	RNA binding	MF	ANIA_00072 | ANIA_00142 | ANIA_00189 | ANIA_00984 | ANIA_01045 | ANIA_01319 | ANIA_01521 | ANIA_01709 | ANIA_01723 | ANIA_01957 | ANIA_02147 | ANIA_03156 | ANIA_03411 | ANIA_03413 | ANIA_03649 | ANIA_04015 | ANIA_04087 | ANIA_04505 | ANIA_04581 | ANIA_04594 | ANIA_04617 | ANIA_04803 | ANIA_04943 | ANIA_05164 | ANIA_05441 | ANIA_06165 | ANIA_06171 | ANIA_06331 | ANIA_06507 | ANIA_06698 | ANIA_0807…	1.522415e-14	2.706093e-12	58 / 90	58 / 2840
GO:0042254	ribosome biogenesis	BP	ANIA_00695 | ANIA_00728 | ANIA_01215 | ANIA_01319 | ANIA_01474 | ANIA_02263 | ANIA_02734 | ANIA_03745 | ANIA_04560 | ANIA_04708 | ANIA_05441 | ANIA_05865 | ANIA_06266 | ANIA_06334 | ANIA_06902 | ANIA_08491 | ANIA_08724 | ANIA_08860 | ANIA_01533 | ANIA_05520 | ANIA_05875 | ANIA_08254 | ANIA_10712 | ANIA_05711	1.527906e-13	2.414091e-11	24 / 25	24 / 2840
GO:0003899	DNA-directed RNA polymerase activity	MF	ANIA_00752 | ANIA_01447 | ANIA_01521 | ANIA_02135 | ANIA_02283 | ANIA_02415 | ANIA_02747 | ANIA_03033 | ANIA_03933 | ANIA_04219 | ANIA_04269 | ANIA_06252 | ANIA_06558 | ANIA_07608 | ANIA_07609 | ANIA_09102 | ANIA_09125 | ANIA_00192 | ANIA_00321 | ANIA_10316 | ANIA_10362 | ANIA_10970 | ANIA_11183 | ANIA_11406	1.495028e-12	2.12593e-10	24 / 26	24 / 2840
GO:0004812	aminoacyl-tRNA ligase activity	MF	ANIA_00057 | ANIA_00428 | ANIA_00936 | ANIA_01380 | ANIA_01709 | ANIA_01913 | ANIA_02150 | ANIA_03702 | ANIA_03824 | ANIA_04550 | ANIA_05662 | ANIA_06368 | ANIA_06526 | ANIA_07361 | ANIA_07479 | ANIA_00046 | ANIA_01201 | ANIA_01710 | ANIA_03073 | ANIA_03865 | ANIA_04086 | ANIA_06253 | ANIA_08224 | ANIA_08800 | ANIA_10353 | ANIA_10393 | ANIA_10474 | ANIA_11110 | ANIA_11125	1.039903e-11	1.34431e-9	29 / 36	29 / 2840
GO:0005739	mitochondrion	CC	ANIA_00259 | ANIA_01709 | ANIA_02185 | ANIA_03068 | ANIA_03758 | ANIA_04415 | ANIA_04708 | ANIA_05008 | ANIA_06248 | ANIA_06272 | ANIA_07629 | ANIA_07742 | ANIA_08750 | ANIA_08780 | ANIA_09078 | ANIA_00630 | ANIA_00824 | ANIA_00932 | ANIA_01281 | ANIA_02306 | ANIA_02999 | ANIA_04388 | ANIA_05916 | ANIA_06255 | ANIA_06279 | ANIA_08770 | ANIA_10495 | ANIA_10512 | ANIA_10713 | ANIA_10879 | ANIA_1113…	3.235193e-11	3.833704e-9	35 / 49	35 / 2840
GO:0008033	tRNA processing	BP	ANIA_00114 | ANIA_00130 | ANIA_00189 | ANIA_00956 | ANIA_01486 | ANIA_02437 | ANIA_02967 | ANIA_06577 | ANIA_08780 | ANIA_09406 | ANIA_00141 | ANIA_00745 | ANIA_01751 | ANIA_06253 | ANIA_07028 | ANIA_00450 | ANIA_10451 | ANIA_02735	3.949683e-10	4.320346e-8	18 / 19	18 / 2840
GO:0000166	nucleotide binding	MF	ANIA_00259 | ANIA_00057 | ANIA_00059 | ANIA_00109 | ANIA_00114 | ANIA_00133 | ANIA_00228 | ANIA_00266 | ANIA_00381 | ANIA_00404 | ANIA_00428 | ANIA_00561 | ANIA_00637 | ANIA_00771 | ANIA_00847 | ANIA_00936 | ANIA_01045 | ANIA_01207 | ANIA_01223 | ANIA_01340 | ANIA_01380 | ANIA_01394 | ANIA_01408 | ANIA_01485 | ANIA_01709 | ANIA_01851 | ANIA_01913 | ANIA_02062 | ANIA_02080 | ANIA_02150 | ANIA_0221…	7.082205e-10	7.193496e-8	162 / 411	162 / 2840
GO:0006418	tRNA aminoacylation for protein translation	BP	ANIA_00057 | ANIA_00428 | ANIA_00936 | ANIA_01380 | ANIA_01709 | ANIA_01913 | ANIA_02150 | ANIA_03702 | ANIA_03824 | ANIA_04550 | ANIA_05662 | ANIA_06368 | ANIA_06526 | ANIA_07361 | ANIA_07479 | ANIA_00046 | ANIA_01710 | ANIA_03073 | ANIA_03865 | ANIA_06253 | ANIA_08224 | ANIA_08800 | ANIA_10353 | ANIA_10393 | ANIA_11125	9.630428e-10	9.129645e-8	25 / 32	25 / 2840
GO:0006364	rRNA processing	BP	ANIA_00189 | ANIA_00475 | ANIA_00796 | ANIA_01175 | ANIA_01964 | ANIA_03313 | ANIA_03823 | ANIA_04460 | ANIA_04648 | ANIA_04916 | ANIA_08073 | ANIA_08860 | ANIA_00745 | ANIA_04298 | ANIA_05875 | ANIA_08293 | ANIA_05711	1.449864e-9	1.288567e-7	17 / 18	17 / 2840
GO:0000502	proteasome complex	CC	ANIA_00927 | ANIA_01209 | ANIA_01757 | ANIA_01922 | ANIA_02085 | ANIA_02213 | ANIA_03756 | ANIA_04449 | ANIA_04731 | ANIA_05784 | ANIA_05793 | ANIA_05872 | ANIA_06547 | ANIA_06726 | ANIA_07579 | ANIA_08253 | ANIA_01245 | ANIA_03019 | ANIA_04492 | ANIA_04869 | ANIA_08054 | ANIA_10519 | ANIA_10708	6.910935e-8	5.78079e-06	23 / 32	23 / 2840
GO:0005525	GTP binding	MF	ANIA_00259 | ANIA_00889 | ANIA_01215 | ANIA_01394 | ANIA_01408 | ANIA_02080 | ANIA_02244 | ANIA_02263 | ANIA_03090 | ANIA_04038 | ANIA_04708 | ANIA_04915 | ANIA_05020 | ANIA_05819 | ANIA_05865 | ANIA_06334 | ANIA_06522 | ANIA_06627 | ANIA_07487 | ANIA_08246 | ANIA_08868 | ANIA_00089 | ANIA_00347 | ANIA_00634 | ANIA_00692 | ANIA_01084 | ANIA_01666 | ANIA_04218 | ANIA_04281 | ANIA_04470 | ANIA_0466…	1.029253e-7	8.1311e-06	43 / 80	43 / 2840
GO:0006457	protein folding	BP	ANIA_00380 | ANIA_00381 | ANIA_00862 | ANIA_01205 | ANIA_01469 | ANIA_01851 | ANIA_03060 | ANIA_03070 | ANIA_03134 | ANIA_03673 | ANIA_04602 | ANIA_05713 | ANIA_06170 | ANIA_06248 | ANIA_08605 | ANIA_01904 | ANIA_02149 | ANIA_02918 | ANIA_03592 | ANIA_04033 | ANIA_05970 | ANIA_06145 | ANIA_07360	1.719795e-7	1.28713e-05	23 / 33	23 / 2840
GO:0016740	transferase activity	MF	ANIA_00259 | ANIA_00086 | ANIA_00130 | ANIA_00487 | ANIA_00626 | ANIA_00629 | ANIA_01048 | ANIA_01328 | ANIA_01683 | ANIA_01743 | ANIA_01957 | ANIA_01990 | ANIA_02102 | ANIA_02294 | ANIA_02479 | ANIA_02626 | ANIA_02745 | ANIA_03033 | ANIA_03065 | ANIA_03175 | ANIA_03177 | ANIA_03313 | ANIA_03419 | ANIA_03603 | ANIA_03628 | ANIA_03634 | ANIA_03649 | ANIA_03728 | ANIA_03933 | ANIA_04258 | ANIA_0430…	6.476846e-7	4.60504e-05	138 / 370	138 / 2840
GO:0051082	unfolded protein binding	MF	ANIA_00381 | ANIA_00862 | ANIA_01205 | ANIA_01851 | ANIA_03060 | ANIA_03070 | ANIA_03134 | ANIA_03673 | ANIA_04602 | ANIA_05713 | ANIA_06170 | ANIA_01904 | ANIA_02149 | ANIA_02918 | ANIA_03592 | ANIA_04033 | ANIA_07360	6.95101e-7	4.70683e-05	17 / 22	17 / 2840
GO:0015935	small ribosomal subunit	CC	ANIA_01345 | ANIA_03413 | ANIA_04087 | ANIA_04594 | ANIA_04803 | ANIA_05441 | ANIA_00843 | ANIA_04251 | ANIA_04730 | ANIA_05997	1.37608e-06	8.89449e-05	10 / 10	10 / 2840
GO:0005743	mitochondrial inner membrane	CC	ANIA_01230 | ANIA_03068 | ANIA_04064 | ANIA_05356 | ANIA_05786 | ANIA_05971 | ANIA_08118 | ANIA_08762 | ANIA_01281 | ANIA_04388 | ANIA_10568 | ANIA_11347	4.86385e-06	0.000300713	12 / 14	12 / 2840
GO:0015934	large ribosomal subunit	CC	ANIA_00570 | ANIA_00776 | ANIA_01095 | ANIA_01393 | ANIA_03649 | ANIA_01122 | ANIA_04652 | ANIA_06146 | ANIA_04202	5.31371e-06	0.000302244	9 / 9	9 / 2840
GO:0001522	pseudouridine synthesis	BP	ANIA_00072 | ANIA_00728 | ANIA_00984 | ANIA_06165 | ANIA_08724 | ANIA_03170 | ANIA_08254 | ANIA_10712 | ANIA_10936	5.31371e-06	0.000302244	9 / 9	9 / 2840
GO:0015031	protein transport	BP	ANIA_03029 | ANIA_04207 | ANIA_04589 | ANIA_04915 | ANIA_05519 | ANIA_05632 | ANIA_05895 | ANIA_06080 | ANIA_07310 | ANIA_07721 | ANIA_07741 | ANIA_09396 | ANIA_00089 | ANIA_00347 | ANIA_01281 | ANIA_01365 | ANIA_03026 | ANIA_04281 | ANIA_05950 | ANIA_06898 | ANIA_07602 | ANIA_07682 | ANIA_08795 | ANIA_11136 | ANIA_11226 | ANIA_02142	1.03746e-05	0.00056741	26 / 46	26 / 2840
GO:0006413	translational initiation	BP	ANIA_00312 | ANIA_00978 | ANIA_01083 | ANIA_01538 | ANIA_02775 | ANIA_03156 | ANIA_03411 | ANIA_04015 | ANIA_04038 | ANIA_05498 | ANIA_06864 | ANIA_08066 | ANIA_08191 | ANIA_08232 | ANIA_00292 | ANIA_01353 | ANIA_02992 | ANIA_07350 | ANIA_08712 | ANIA_08883 | ANIA_10182 | ANIA_10535 | ANIA_11056	1.29417e-05	0.000634589	23 / 39	23 / 2840
GO:0003743	translation initiation factor activity	MF	ANIA_00312 | ANIA_00978 | ANIA_01083 | ANIA_01538 | ANIA_02775 | ANIA_03156 | ANIA_03411 | ANIA_04015 | ANIA_04038 | ANIA_05498 | ANIA_06864 | ANIA_08066 | ANIA_08191 | ANIA_08232 | ANIA_00292 | ANIA_01353 | ANIA_02992 | ANIA_07350 | ANIA_08712 | ANIA_08883 | ANIA_10182 | ANIA_10535 | ANIA_11056	1.29417e-05	0.000634589	23 / 39	23 / 2840
GO:0006184	obsolete GTP catabolic process	BP	ANIA_00232 | ANIA_00889 | ANIA_01215 | ANIA_01408 | ANIA_02080 | ANIA_02263 | ANIA_03090 | ANIA_04038 | ANIA_04708 | ANIA_06334 | ANIA_06522 | ANIA_06627 | ANIA_08246 | ANIA_08868 | ANIA_01084 | ANIA_04218 | ANIA_04470 | ANIA_04685 | ANIA_04953 | ANIA_05082 | ANIA_05482 | ANIA_10535 | ANIA_10627	1.29417e-05	0.000634589	23 / 39	23 / 2840
GO:0015986	ATP synthesis coupled proton transport	BP	ANIA_00943 | ANIA_01534 | ANIA_06287 | ANIA_06631 | ANIA_00252 | ANIA_01523 | ANIA_02315 | ANIA_10032 | ANIA_11303 | ANIA_11444 | ANIA_11499	1.61773e-05	0.000766805	11 / 13	11 / 2840
GO:0004298	threonine-type endopeptidase activity	MF	ANIA_01757 | ANIA_02085 | ANIA_03756 | ANIA_04449 | ANIA_05784 | ANIA_05793 | ANIA_05872 | ANIA_06547 | ANIA_06726 | ANIA_04869 | ANIA_08054 | ANIA_10708	1.85323e-05	0.000798572	12 / 15	12 / 2840
GO:0005839	proteasome core complex	CC	ANIA_01757 | ANIA_02085 | ANIA_03756 | ANIA_04449 | ANIA_05784 | ANIA_05793 | ANIA_05872 | ANIA_06547 | ANIA_06726 | ANIA_04869 | ANIA_08054 | ANIA_10708	1.85323e-05	0.000798572	12 / 15	12 / 2840
GO:0051603	proteolysis involved in cellular protein catabolic process	BP	ANIA_01757 | ANIA_02085 | ANIA_03756 | ANIA_04449 | ANIA_05784 | ANIA_05793 | ANIA_05872 | ANIA_06547 | ANIA_06726 | ANIA_04869 | ANIA_08054 | ANIA_10708	1.85323e-05	0.000798572	12 / 15	12 / 2840
GO:0032040	small-subunit processome	CC	ANIA_00475 | ANIA_00796 | ANIA_01434 | ANIA_04460 | ANIA_04916 | ANIA_08293 | ANIA_10052 | ANIA_10865	2.05123e-05	0.000833385	8 / 8	8 / 2840
GO:0019843	rRNA binding	MF	ANIA_01770 | ANIA_04803 | ANIA_05164 | ANIA_06171 | ANIA_09465 | ANIA_04794 | ANIA_06302 | ANIA_10161	2.05123e-05	0.000833385	8 / 8	8 / 2840
GO:0032259	methylation	BP	ANIA_00130 | ANIA_01743 | ANIA_01957 | ANIA_02759 | ANIA_03313 | ANIA_03603 | ANIA_04587 | ANIA_04613 | ANIA_04774 | ANIA_04918 | ANIA_05019 | ANIA_05415 | ANIA_05789 | ANIA_06094 | ANIA_06589 | ANIA_07146 | ANIA_08073 | ANIA_08799 | ANIA_08855 | ANIA_09399 | ANIA_09406 | ANIA_00141 | ANIA_00745 | ANIA_00757 | ANIA_01376 | ANIA_01751 | ANIA_01999 | ANIA_02104 | ANIA_02165 | ANIA_03096 | ANIA_0454…	4.88302e-05	0.00192879	44 / 99	44 / 2840
GO:0006547	histidine metabolic process	BP	ANIA_01743 | ANIA_01957 | ANIA_01965 | ANIA_02293 | ANIA_03169 | ANIA_03313 | ANIA_06536 | ANIA_07044 | ANIA_03096 | ANIA_03748 | ANIA_06711	5.76601e-05	0.00221602	11 / 14	11 / 2840
GO:0003924	GTPase activity	MF	ANIA_00232 | ANIA_00889 | ANIA_01215 | ANIA_01408 | ANIA_02080 | ANIA_02263 | ANIA_03090 | ANIA_04038 | ANIA_04708 | ANIA_06334 | ANIA_06522 | ANIA_06627 | ANIA_08246 | ANIA_01084 | ANIA_04218 | ANIA_04470 | ANIA_04953 | ANIA_05082 | ANIA_05482 | ANIA_10535 | ANIA_10627	6.79075e-05	0.00254117	21 / 37	21 / 2840
GO:0008168	methyltransferase activity	MF	ANIA_01743 | ANIA_01957 | ANIA_02759 | ANIA_03313 | ANIA_03603 | ANIA_04587 | ANIA_04613 | ANIA_04774 | ANIA_04918 | ANIA_05415 | ANIA_05789 | ANIA_06094 | ANIA_06589 | ANIA_07146 | ANIA_08073 | ANIA_08799 | ANIA_08855 | ANIA_09399 | ANIA_00141 | ANIA_00745 | ANIA_00757 | ANIA_01751 | ANIA_01999 | ANIA_02104 | ANIA_02165 | ANIA_03096 | ANIA_04543 | ANIA_05871 | ANIA_08531 | ANIA_08945 | ANIA_1013…	7.1864e-05	0.00262027	38 / 83	38 / 2840
GO:0019773	proteasome core complex, alpha-subunit complex	CC	ANIA_01757 | ANIA_05793 | ANIA_05872 | ANIA_06547 | ANIA_06726 | ANIA_04869 | ANIA_08054	7.91576e-05	0.00268005	7 / 7	7 / 2840
GO:0022627	cytosolic small ribosomal subunit	CC	ANIA_00465 | ANIA_01964 | ANIA_03823 | ANIA_04087 | ANIA_04916 | ANIA_05979 | ANIA_06632	7.91576e-05	0.00268005	7 / 7	7 / 2840
GO:0016651	oxidoreductase activity, acting on NAD(P)H	MF	ANIA_04288 | ANIA_05629 | ANIA_05971 | ANIA_07497 | ANIA_02414 | ANIA_05703 | ANIA_10229	7.91576e-05	0.00268005	7 / 7	7 / 2840
GO:0006139	nucleobase-containing compound metabolic process	BP	ANIA_00259 | ANIA_00072 | ANIA_00271 | ANIA_00919 | ANIA_03104 | ANIA_04011 | ANIA_04258 | ANIA_04739 | ANIA_05884 | ANIA_05999 | ANIA_06165 | ANIA_06209 | ANIA_08869 | ANIA_00490 | ANIA_03170 | ANIA_03626 | ANIA_04464 | ANIA_07028 | ANIA_07502 | ANIA_08213 | ANIA_08571 | ANIA_09436	8.71398e-05	0.00288169	22 / 40	22 / 2840
GO:0006091	generation of precursor metabolites and energy	BP	ANIA_00357 | ANIA_00747 | ANIA_01063 | ANIA_01534 | ANIA_02316 | ANIA_04064 | ANIA_04927 | ANIA_05597 | ANIA_05629 | ANIA_06077 | ANIA_06287 | ANIA_06631 | ANIA_07464 | ANIA_08118 | ANIA_00252 | ANIA_01523 | ANIA_02306 | ANIA_02315 | ANIA_02414 | ANIA_04388 | ANIA_05703 | ANIA_06255 | ANIA_08273	0.000107416	0.00347149	23 / 43	23 / 2840
GO:0044267	cellular protein metabolic process	BP	ANIA_00381 | ANIA_01851 | ANIA_03070 | ANIA_03134 | ANIA_05713 | ANIA_01904 | ANIA_02149 | ANIA_02918	0.000142101	0.00449039	8 / 9	8 / 2840
GO:0005856	cytoskeleton	CC	ANIA_00306 | ANIA_05778 | ANIA_00140 | ANIA_00673 | ANIA_04919 | ANIA_05082 | ANIA_08065 | ANIA_08698 | ANIA_10627	0.000172053	0.00520552	9 / 11	9 / 2840
GO:0004175	endopeptidase activity	MF	ANIA_01757 | ANIA_02085 | ANIA_03756 | ANIA_05793 | ANIA_05872 | ANIA_06547 | ANIA_06726 | ANIA_04869 | ANIA_10708	0.000172053	0.00520552	9 / 11	9 / 2840
GO:0008137	NADH dehydrogenase (ubiquinone) activity	MF	ANIA_01063 | ANIA_04288 | ANIA_05629 | ANIA_05704 | ANIA_06077 | ANIA_07489 | ANIA_09078 | ANIA_00630 | ANIA_01936 | ANIA_02260 | ANIA_02414 | ANIA_04297 | ANIA_10229 | ANIA_11377	0.000219306	0.00649693	14 / 22	14 / 2840
GO:0030833	regulation of actin filament polymerization	BP	ANIA_00306 | ANIA_05778 | ANIA_00140 | ANIA_00673 | ANIA_04919 | ANIA_08065	0.000305375	0.00819327	6 / 6	6 / 2840
GO:0030488	tRNA methylation	BP	ANIA_03603 | ANIA_08799 | ANIA_09406 | ANIA_00757 | ANIA_10451 | ANIA_02735	0.000305375	0.00819327	6 / 6	6 / 2840
GO:0008121	ubiquinol-cytochrome-c reductase activity	MF	ANIA_00357 | ANIA_00747 | ANIA_05597 | ANIA_02306 | ANIA_04388 | ANIA_08273	0.000305375	0.00819327	6 / 6	6 / 2840
GO:0016272	prefoldin complex	CC	ANIA_00862 | ANIA_01205 | ANIA_03060 | ANIA_03673 | ANIA_04602 | ANIA_04033	0.000305375	0.00819327	6 / 6	6 / 2840
GO:0000049	tRNA binding	MF	ANIA_03824 | ANIA_07361 | ANIA_06253 | ANIA_10474 | ANIA_00450 | ANIA_10451	0.000305375	0.00819327	6 / 6	6 / 2840
GO:0015078	hydrogen ion transmembrane transporter activity	MF	ANIA_00943 | ANIA_01534 | ANIA_03168 | ANIA_04718 | ANIA_06631 | ANIA_07603 | ANIA_01195 | ANIA_03088 | ANIA_11303 | ANIA_11444	0.000473109	0.012232	10 / 14	10 / 2840
GO:0046961	proton-transporting ATPase activity, rotational mechanism	MF	ANIA_01534 | ANIA_04927 | ANIA_05880 | ANIA_06287 | ANIA_06631 | ANIA_00252 | ANIA_01523 | ANIA_02315 | ANIA_10032 | ANIA_11499	0.000473109	0.012232	10 / 14	10 / 2840
GO:0009982	pseudouridine synthase activity	MF	ANIA_00072 | ANIA_00984 | ANIA_06165 | ANIA_03170 | ANIA_10936	0.00117771	0.0283848	5 / 5	5 / 2840
GO:0009451	RNA modification	BP	ANIA_00072 | ANIA_00984 | ANIA_06165 | ANIA_03170 | ANIA_10936	0.00117771	0.0283848	5 / 5	5 / 2840
GO:0005759	mitochondrial matrix	CC	ANIA_00259 | ANIA_03034 | ANIA_06248 | ANIA_06272 | ANIA_06708	0.00117771	0.0283848	5 / 5	5 / 2840
GO:0046939	nucleotide phosphorylation	BP	ANIA_00259 | ANIA_04258 | ANIA_08860 | ANIA_08213 | ANIA_10188	0.00117771	0.0283848	5 / 5	5 / 2840
GO:0043039	tRNA aminoacylation	BP	ANIA_03824 | ANIA_05662 | ANIA_07361 | ANIA_06253 | ANIA_08224 | ANIA_11110	0.00166268	0.0383937	6 / 7	6 / 2840
GO:0051536	iron-sulfur cluster binding	MF	ANIA_00447 | ANIA_00502 | ANIA_02294 | ANIA_03296 | ANIA_04288 | ANIA_04977 | ANIA_06643 | ANIA_07364 | ANIA_07600 | ANIA_02306 | ANIA_04297 | ANIA_05134 | ANIA_05703 | ANIA_07611 | ANIA_10978	0.00167404	0.0383937	15 / 28	15 / 2840
GO:0097308	cellular response to farnesol	BP	ANIA_00747 | ANIA_02062 | ANIA_02150 | ANIA_02435 | ANIA_04015 | ANIA_04163 | ANIA_04300 | ANIA_04616 | ANIA_05999 | ANIA_07208 | ANIA_07594 | ANIA_08605 | ANIA_00179 | ANIA_01366 | ANIA_03226 | ANIA_04667 | ANIA_08021 | ANIA_08273	0.00167839	0.0383937	18 / 36	18 / 2840
GO:0046933	proton-transporting ATP synthase activity, rotational mechanism	MF	ANIA_01534 | ANIA_06287 | ANIA_00252 | ANIA_01523 | ANIA_02315 | ANIA_10032 | ANIA_11499	0.00170618	0.0383937	7 / 9	7 / 2840
GO:0006414	translational elongation	BP	ANIA_00465 | ANIA_01162 | ANIA_02734 | ANIA_03823 | ANIA_05719 | ANIA_05979 | ANIA_05996 | ANIA_06563 | ANIA_01084 | ANIA_04218 | ANIA_06700	0.00172799	0.0383937	11 / 18	11 / 2840
KEGG
KEGG pathway ID	KEGG pathway name	KEGG main category	Gene ID(s)	Exact p-value	Adjusted p-value	# genes / category	# genes / input
3010	Ribosome	Genetic Information Processing	AN0116.2 | AN0123.2 | AN0142.2 | AN0262.2 | AN0433.2 | AN0445.2 | AN0465.2 | AN0470.2 | AN0570.2 | AN0776.2 | AN0843.2 | AN0907.2 | AN1013.2 | AN1095.2 | AN1122.2 | AN1166.2 | AN1228.2 | AN1345.2 | AN1393.2 | AN1770.2 | AN1964.2 | AN1970.2 | AN2057.2 | AN2268.2 | AN2275.2 | AN2734.2 | AN2980.2 | AN3172.2 | AN3413.2 | AN3706.2 | AN3823.2 | AN4016.2 | AN4060.2 | AN4073.2 | AN4087.2 | AN4202.2 | AN4…	1.175669e-29	1.234453e-27	89 / 90	89 / 2840
3008	Ribosome biogenesis in eukaryotes	Genetic Information Processing	AN0124.2 | AN0189.2 | AN0247.2 | AN0305.2 | AN0475.2 | AN0647.2 | AN0695.2 | AN0745.2 | AN1215.2 | AN1272.2 | AN1319.2 | AN1366.2 | AN1474.2 | AN1485.2 | AN1486.2 | AN1666.2 | AN1711.2 | AN1983.2 | AN2263.2 | AN2437.2 | AN2759.2 | AN3167.2 | AN3455.2 | AN3652.2 | AN3794.2 | AN3864.2 | AN4298.2 | AN4330.2 | AN4460.2 | AN4631.2 | AN4648.2 | AN5010.2 | AN5455.2 | AN5482.2 | AN5865.2 | AN6171.2 | AN6…	5.66351e-9	2.973343e-7	47 / 56	47 / 2840
190	Oxidative phosphorylation	Metabolism	AN0110.2 | AN0252.2 | AN0357.2 | AN0943.2 | AN1063.2 | AN1195.2 | AN1523.2 | AN1534.2 | AN1624.2 | AN1722.2 | AN1915.2 | AN2306.2 | AN2315.2 | AN2316.2 | AN2414.2 | AN3088.2 | AN3168.2 | AN3922.2 | AN4288.2 | AN4297.2 | AN4388.2 | AN4718.2 | AN4863.2 | AN4927.2 | AN5597.2 | AN5629.2 | AN5704.2 | AN5880.2 | AN5971.2 | AN6077.2 | AN6255.2 | AN6287.2 | AN6557.2 | AN6631.2 | AN7497.2 | AN7603.2 | AN8…	5.24134e-7	1.83447e-05	43 / 54	43 / 2840
3020	RNA polymerase	Genetic Information Processing	AN0192.2 | AN0321.2 | AN0752.2 | AN1447.2 | AN1521.2 | AN2235.2 | AN2283.2 | AN2415.2 | AN2747.2 | AN3933.2 | AN4219.2 | AN4269.2 | AN6252.2 | AN6558.2 | AN8272.2 | AN9102.2 | AN9125.2	0.000122794	0.00322335	17 / 19	17 / 2840
970	Aminoacyl-tRNA biosynthesis	Genetic Information Processing	AN0046.2 | AN0057.2 | AN0428.2 | AN0936.2 | AN1380.2 | AN1709.2 | AN1710.2 | AN1913.2 | AN2150.2 | AN2900.2 | AN3073.2 | AN3702.2 | AN3824.2 | AN3865.2 | AN4086.2 | AN4550.2 | AN5662.2 | AN5738.2 | AN6253.2 | AN6368.2 | AN6489.2 | AN6526.2 | AN7361.2 | AN7479.2 | AN8224.2 | AN8800.2	0.00015394	0.00323274	26 / 33	26 / 2840
3040	Spliceosome	Genetic Information Processing	AN0133.2 | AN0211.2 | AN0714.2 | AN0727.2 | AN0767.2 | AN1178.2 | AN1208.2 | AN1249.2 | AN1259.2 | AN1260.2 | AN1319.2 | AN1350.2 | AN1408.2 | AN1468.2 | AN1495.2 | AN1634.2 | AN1802.2 | AN1951.2 | AN2007.2 | AN2105.2 | AN3651.2 | AN4032.2 | AN4090.2 | AN4244.2 | AN4458.2 | AN4505.2 | AN4707.2 | AN4788.2 | AN4943.2 | AN5452.2 | AN5530.2 | AN5931.2 | AN6110.2 | AN6142.2 | AN6501.2 | AN6507.2 | AN6…	0.000729095	0.0127592	49 / 75	49 / 2840
240	Pyrimidine metabolism	Metabolism	AN0067.2 | AN0179.2 | AN0192.2 | AN0271.2 | AN0321.2 | AN0490.2 | AN0565.2 | AN0752.2 | AN1447.2 | AN1521.2 | AN1823.2 | AN2235.2 | AN2243.2 | AN2283.2 | AN2415.2 | AN2747.2 | AN3033.2 | AN3933.2 | AN4219.2 | AN4258.2 | AN4269.2 | AN5884.2 | AN5999.2 | AN6157.2 | AN6252.2 | AN6558.2 | AN7028.2 | AN7429.2 | AN7502.2 | AN8213.2 | AN8216.2 | AN8272.2 | AN8869.2 | AN9102.2 | AN9125.2	0.00115983	0.0173974	35 / 51	35 / 2840

## Sheet: Sheet 4
Supplementary Table S4 Significantly enriched FunCat, GO and KEGG pathway terms.
Sheet 4 - DatfA mutant Cd treated vs. reference strain Cd treated
mt vs ct	down-regulated genes	DatfA mutant Cd treated vs. reference strain Cd treated
FunCat
FunCat ID	FunCat description	FunCat main category	Gene ID(s)	Exact p-value	Adjusted p-value	# genes / category	# genes / input
10.01.09.05	DNA conformation modification (e.g. chromatin)	Cell cycle and DNA processing	ANIA_00044 | ANIA_00134 | ANIA_00153 | ANIA_00176 | ANIA_00310 | ANIA_00707 | ANIA_00808 | ANIA_00816 | ANIA_00917 | ANIA_01024 | ANIA_01060 | ANIA_01200 | ANIA_01254 | ANIA_01286 | ANIA_01339 | ANIA_01546 | ANIA_01782 | ANIA_01929 | ANIA_01949 | ANIA_01962 | ANIA_01966 | ANIA_01971 | ANIA_01976 | ANIA_01984 | ANIA_02087 | ANIA_02147 | ANIA_02256 | ANIA_02278 | ANIA_02285 | ANIA_02490 | ANIA_0276…	4.59207e-05	0.0084656	86 / 260	86 / 2386
40.01.03	directional cell growth (morphogenesis)	Cell fate	ANIA_00106 | ANIA_00144 | ANIA_00163 | ANIA_01254 | ANIA_01800 | ANIA_02363 | ANIA_02581 | ANIA_03101 | ANIA_03214 | ANIA_03434 | ANIA_03815 | ANIA_03827 | ANIA_04113 | ANIA_04435 | ANIA_04564 | ANIA_04719 | ANIA_04887 | ANIA_05666 | ANIA_05677 | ANIA_05787 | ANIA_06508 | ANIA_07487 | ANIA_07572 | ANIA_07657 | ANIA_07945 | ANIA_08421 | ANIA_10731	6.36092e-05	0.0084656	27 / 59	27 / 2386
30.05	transmembrane signal transduction	Cellular communication / signal transduction mechanism	ANIA_00144 | ANIA_00931 | ANIA_01025 | ANIA_01800 | ANIA_02067 | ANIA_02363 | ANIA_02366 | ANIA_02581 | ANIA_03101 | ANIA_03214 | ANIA_03422 | ANIA_03524 | ANIA_03719 | ANIA_04113 | ANIA_04279 | ANIA_04887 | ANIA_05492 | ANIA_06768 | ANIA_06820 | ANIA_06982 | ANIA_07487 | ANIA_07698 | ANIA_07945 | ANIA_08642 | ANIA_08836 | ANIA_09289	6.39822e-05	0.0084656	26 / 56	26 / 2386
30.05.01.10	two-component signal transduction system (sensor kinase component)	Cellular communication / signal transduction mechanism	ANIA_01800 | ANIA_02363 | ANIA_02581 | ANIA_03101 | ANIA_03102 | ANIA_03214 | ANIA_04113 | ANIA_04479 | ANIA_04818 | ANIA_06820 | ANIA_07697 | ANIA_07945	7.78088e-05	0.0084656	12 / 18	12 / 2386
43.01.03.06	hyphae formation	Cell type differentiation	ANIA_01547 | ANIA_02009 | ANIA_02363 | ANIA_03101 | ANIA_03102 | ANIA_03214 | ANIA_03434 | ANIA_04479 | ANIA_06611 | ANIA_06820 | ANIA_07697 | ANIA_07945	7.78088e-05	0.0084656	12 / 18	12 / 2386
11.02.03.04	transcriptional control	Transcription	ANIA_00038 | ANIA_00078 | ANIA_00098 | ANIA_00134 | ANIA_00153 | ANIA_00156 | ANIA_00176 | ANIA_00228 | ANIA_00310 | ANIA_00573 | ANIA_00594 | ANIA_00707 | ANIA_00808 | ANIA_00816 | ANIA_00835 | ANIA_00917 | ANIA_01024 | ANIA_01060 | ANIA_01200 | ANIA_01254 | ANIA_01286 | ANIA_01406 | ANIA_01425 | ANIA_01494 | ANIA_01546 | ANIA_01641 | ANIA_01652 | ANIA_01782 | ANIA_01924 | ANIA_01929 | ANIA_0193…	9.62452e-05	0.00872623	176 / 612	176 / 2386
32.05.01.03	chemical agent resistance	Cell rescue, defense and virulence	ANIA_00835 | ANIA_01089 | ANIA_01174 | ANIA_02367 | ANIA_02368 | ANIA_03247 | ANIA_03300 | ANIA_03433 | ANIA_03522 | ANIA_03952 | ANIA_04749 | ANIA_04940 | ANIA_05412 | ANIA_06443 | ANIA_07149 | ANIA_07513 | ANIA_08813 | ANIA_10325 | ANIA_10462 | ANIA_10937 | ANIA_10949	0.000131143	0.0101917	21 / 43	21 / 2386
16.19.03	ATP binding	Protein with binding function or cofactor requirement (structural or analytic)	ANIA_00044 | ANIA_00106 | ANIA_00118 | ANIA_00133 | ANIA_00228 | ANIA_00272 | ANIA_00314 | ANIA_00377 | ANIA_00482 | ANIA_00646 | ANIA_00822 | ANIA_00858 | ANIA_00931 | ANIA_01024 | ANIA_01097 | ANIA_01159 | ANIA_01163 | ANIA_01171 | ANIA_01174 | ANIA_01222 | ANIA_01339 | ANIA_01632 | ANIA_01708 | ANIA_01746 | ANIA_01761 | ANIA_01874 | ANIA_01904 | ANIA_01949 | ANIA_01966 | ANIA_01971 | ANIA_0206…	0.00038597	0.0222764	166 / 587	166 / 2386
10.01.05.01	DNA repair	Cell cycle and DNA processing	ANIA_00038 | ANIA_00044 | ANIA_00067 | ANIA_00076 | ANIA_00111 | ANIA_00133 | ANIA_00156 | ANIA_00260 | ANIA_00387 | ANIA_00604 | ANIA_00646 | ANIA_00707 | ANIA_01024 | ANIA_01060 | ANIA_01231 | ANIA_01708 | ANIA_01761 | ANIA_02087 | ANIA_02255 | ANIA_02256 | ANIA_02285 | ANIA_02932 | ANIA_02963 | ANIA_02969 | ANIA_03067 | ANIA_03267 | ANIA_03578 | ANIA_03785 | ANIA_03811 | ANIA_03947 | ANIA_0423…	0.000401112	0.0222764	74 / 230	74 / 2386
20.01.21	RNA transport	Cellular transport, transport facilitation and transport routes	ANIA_00310 | ANIA_00906 | ANIA_01379 | ANIA_02271 | ANIA_03454 | ANIA_03739 | ANIA_04000 | ANIA_04293 | ANIA_04412 | ANIA_04499 | ANIA_05482 | ANIA_05627 | ANIA_05717 | ANIA_06006 | ANIA_06523 | ANIA_06738 | ANIA_06978 | ANIA_06980 | ANIA_07726 | ANIA_08722 | ANIA_08862 | ANIA_10112 | ANIA_10164 | ANIA_10251 | ANIA_10526 | ANIA_10574 | ANIA_10615 | ANIA_10941	0.000427969	0.0222764	28 / 68	28 / 2386
42.10.03	organization of chromosome structure	Biogenesis of cellular components	ANIA_00038 | ANIA_00044 | ANIA_00134 | ANIA_00176 | ANIA_00707 | ANIA_00808 | ANIA_00816 | ANIA_00917 | ANIA_01024 | ANIA_01060 | ANIA_01200 | ANIA_01254 | ANIA_01286 | ANIA_01660 | ANIA_01782 | ANIA_01929 | ANIA_01962 | ANIA_01976 | ANIA_01984 | ANIA_02087 | ANIA_02143 | ANIA_02147 | ANIA_02256 | ANIA_02271 | ANIA_02278 | ANIA_02490 | ANIA_02769 | ANIA_02885 | ANIA_02911 | ANIA_03116 | ANIA_0316…	0.000450443	0.0222764	77 / 242	77 / 2386
43.01.03.09	development of asco- basidio- or zygospore	Cell type differentiation	ANIA_00156 | ANIA_00299 | ANIA_00359 | ANIA_01080 | ANIA_01159 | ANIA_01339 | ANIA_01546 | ANIA_01555 | ANIA_01629 | ANIA_01632 | ANIA_01761 | ANIA_01800 | ANIA_01966 | ANIA_01982 | ANIA_01984 | ANIA_02143 | ANIA_02363 | ANIA_02375 | ANIA_02523 | ANIA_02706 | ANIA_02855 | ANIA_03101 | ANIA_03102 | ANIA_03214 | ANIA_03434 | ANIA_03729 | ANIA_03913 | ANIA_04278 | ANIA_04293 | ANIA_04367 | ANIA_0439…	0.000655329	0.028996	56 / 167	56 / 2386
10.01.02	DNA topology	Cell cycle and DNA processing	ANIA_00044 | ANIA_00133 | ANIA_00228 | ANIA_00646 | ANIA_01024 | ANIA_01971 | ANIA_02087 | ANIA_02256 | ANIA_02278 | ANIA_02285 | ANIA_02491 | ANIA_02885 | ANIA_02932 | ANIA_04233 | ANIA_04272 | ANIA_04412 | ANIA_04472 | ANIA_04903 | ANIA_05406 | ANIA_05494 | ANIA_05931 | ANIA_05992 | ANIA_06070 | ANIA_06585 | ANIA_07007 | ANIA_07014 | ANIA_07246 | ANIA_07423 | ANIA_07994 | ANIA_10194 | ANIA_1041…	0.000692919	0.028996	32 / 83	32 / 2386
16.03.01	DNA binding	Protein with binding function or cofactor requirement (structural or analytic)	ANIA_00038 | ANIA_00044 | ANIA_00098 | ANIA_00153 | ANIA_00176 | ANIA_00228 | ANIA_00260 | ANIA_00387 | ANIA_00707 | ANIA_00809 | ANIA_00816 | ANIA_00917 | ANIA_01024 | ANIA_01200 | ANIA_01231 | ANIA_01254 | ANIA_01641 | ANIA_01652 | ANIA_01708 | ANIA_01782 | ANIA_01848 | ANIA_01924 | ANIA_01929 | ANIA_01962 | ANIA_01971 | ANIA_02087 | ANIA_02147 | ANIA_02255 | ANIA_02256 | ANIA_02271 | ANIA_0227…	0.000883469	0.0315747	123 / 425	123 / 2386
14.07.03	modification by phosphorylation, dephosphorylation, autophosphorylation	Protein fate (folding, modification, destination)	ANIA_00038 | ANIA_00106 | ANIA_00129 | ANIA_00137 | ANIA_00144 | ANIA_00156 | ANIA_00272 | ANIA_00449 | ANIA_00822 | ANIA_00931 | ANIA_01097 | ANIA_01171 | ANIA_01358 | ANIA_01370 | ANIA_01632 | ANIA_01800 | ANIA_02067 | ANIA_02265 | ANIA_02363 | ANIA_02425 | ANIA_02581 | ANIA_02943 | ANIA_03101 | ANIA_03102 | ANIA_03214 | ANIA_03422 | ANIA_03434 | ANIA_03719 | ANIA_03869 | ANIA_03946 | ANIA_0411…	0.000924106	0.0315747	74 / 236	74 / 2386
10.03.01.01	mitotic cell cycle	Cell cycle and DNA processing	ANIA_00228 | ANIA_01761 | ANIA_02143 | ANIA_02491 | ANIA_02963 | ANIA_03719 | ANIA_03795 | ANIA_05406 | ANIA_05495 | ANIA_05666 | ANIA_06070 | ANIA_06364 | ANIA_07296 | ANIA_07994 | ANIA_08056 | ANIA_08865 | ANIA_10497	0.000928668	0.0315747	17 / 36	17 / 2386
10.01.03.05	extension/ polymerization activity	Cell cycle and DNA processing	ANIA_00260 | ANIA_01231 | ANIA_02271 | ANIA_02969 | ANIA_03033 | ANIA_03067 | ANIA_05406 | ANIA_06069 | ANIA_06300 | ANIA_06303 | ANIA_06517 | ANIA_06896 | ANIA_07014 | ANIA_07325 | ANIA_07423 | ANIA_07439 | ANIA_08014 | ANIA_10755 | ANIA_10855	0.00129454	0.0372297	19 / 43	19 / 2386
1.04	phosphate metabolism	Metabolism	ANIA_00038 | ANIA_00044 | ANIA_00106 | ANIA_00118 | ANIA_00129 | ANIA_00144 | ANIA_00156 | ANIA_00272 | ANIA_00449 | ANIA_00646 | ANIA_00822 | ANIA_00858 | ANIA_00870 | ANIA_00925 | ANIA_00931 | ANIA_01015 | ANIA_01024 | ANIA_01097 | ANIA_01148 | ANIA_01163 | ANIA_01171 | ANIA_01174 | ANIA_01222 | ANIA_01292 | ANIA_01309 | ANIA_01358 | ANIA_01370 | ANIA_01408 | ANIA_01414 | ANIA_01482 | ANIA_0163…	0.00133924	0.0372297	142 / 505	142 / 2386
34.11.03.13	osmosensing and response	Interaction with the environment	ANIA_00289 | ANIA_00931 | ANIA_01358 | ANIA_01767 | ANIA_01800 | ANIA_02201 | ANIA_02363 | ANIA_02581 | ANIA_02823 | ANIA_03101 | ANIA_03102 | ANIA_03214 | ANIA_04113 | ANIA_04114 | ANIA_04305 | ANIA_04328 | ANIA_04479 | ANIA_04818 | ANIA_04887 | ANIA_05666 | ANIA_06792 | ANIA_06820 | ANIA_06982 | ANIA_07041 | ANIA_07487 | ANIA_07697 | ANIA_07698 | ANIA_07945 | ANIA_09348 | ANIA_10731	0.00133998	0.0372297	30 / 79	30 / 2386
10.01.03	DNA synthesis and replication	Cell cycle and DNA processing	ANIA_00067 | ANIA_00170 | ANIA_00228 | ANIA_00260 | ANIA_00646 | ANIA_01097 | ANIA_01231 | ANIA_02087 | ANIA_02285 | ANIA_02491 | ANIA_02969 | ANIA_03033 | ANIA_03067 | ANIA_03753 | ANIA_03785 | ANIA_04233 | ANIA_04380 | ANIA_04903 | ANIA_05102 | ANIA_05406 | ANIA_05640 | ANIA_05992 | ANIA_06069 | ANIA_06070 | ANIA_06217 | ANIA_06300 | ANIA_06303 | ANIA_06517 | ANIA_06687 | ANIA_06975 | ANIA_0701…	0.00136874	0.0372297	44 / 128	44 / 2386
36.20.18	plant hormonal regulation	Systematic interaction with the environment	ANIA_01594 | ANIA_01800 | ANIA_02363 | ANIA_02564 | ANIA_02581 | ANIA_03101 | ANIA_03214 | ANIA_04113 | ANIA_06812 | ANIA_07945 | ANIA_09314	0.00160827	0.0416619	11 / 20	11 / 2386
10.03.01	mitotic cell cycle and cell cycle control	Cell cycle and DNA processing	ANIA_00106 | ANIA_00111 | ANIA_00129 | ANIA_00134 | ANIA_00137 | ANIA_00170 | ANIA_00228 | ANIA_00359 | ANIA_00414 | ANIA_00707 | ANIA_00844 | ANIA_01080 | ANIA_01096 | ANIA_01097 | ANIA_01158 | ANIA_01215 | ANIA_01370 | ANIA_01379 | ANIA_01629 | ANIA_01966 | ANIA_02128 | ANIA_02130 | ANIA_02278 | ANIA_02302 | ANIA_02531 | ANIA_02663 | ANIA_02743 | ANIA_02854 | ANIA_02861 | ANIA_02947 | ANIA_0296…	0.00176385	0.0436153	95 / 322	95 / 2386
11.02.03.04.03	transcription repression	Transcription	ANIA_01024 | ANIA_01060 | ANIA_01254 | ANIA_01286 | ANIA_01546 | ANIA_01782 | ANIA_01962 | ANIA_02554 | ANIA_02855 | ANIA_02997 | ANIA_03785 | ANIA_04518 | ANIA_04585 | ANIA_04608 | ANIA_04734 | ANIA_05583 | ANIA_05640 | ANIA_06505 | ANIA_06587 | ANIA_06998 | ANIA_07007 | ANIA_07104 | ANIA_07681 | ANIA_08035 | ANIA_08271 | ANIA_08825 | ANIA_09332 | ANIA_09531 | ANIA_10043 | ANIA_10173 | ANIA_10809	0.00192216	0.0454632	31 / 84	31 / 2386
GO
GO ID	GO name	GO namespace	Gene ID(s)	Exact p-value	Adjusted p-value	# genes / category	# genes / input
GO:0016772	transferase activity, transferring phosphorus-containing groups	MF	ANIA_00144 | ANIA_00272 | ANIA_00337 | ANIA_01097 | ANIA_01171 | ANIA_01315 | ANIA_02265 | ANIA_02363 | ANIA_03001 | ANIA_03101 | ANIA_03102 | ANIA_03177 | ANIA_03214 | ANIA_03422 | ANIA_03946 | ANIA_04113 | ANIA_04196 | ANIA_04278 | ANIA_04322 | ANIA_04818 | ANIA_05494 | ANIA_05674 | ANIA_05759 | ANIA_05973 | ANIA_06192 | ANIA_06508 | ANIA_06758 | ANIA_06820 | ANIA_07282 | ANIA_07563 | ANIA_0757…	1.458947e-7	0.000164715	61 / 145	61 / 2386
GO:0004672	protein kinase activity	MF	ANIA_00144 | ANIA_01097 | ANIA_01171 | ANIA_02265 | ANIA_03001 | ANIA_03102 | ANIA_03422 | ANIA_03946 | ANIA_04196 | ANIA_04322 | ANIA_05494 | ANIA_05674 | ANIA_05759 | ANIA_05973 | ANIA_06192 | ANIA_06508 | ANIA_06758 | ANIA_07563 | ANIA_07572 | ANIA_08830 | ANIA_08836 | ANIA_00106 | ANIA_02943 | ANIA_04279 | ANIA_04483 | ANIA_04536 | ANIA_04563 | ANIA_04887 | ANIA_04935 | ANIA_05666 | ANIA_0676…	6.632114e-7	0.000348246	44 / 97	44 / 2386
GO:0006468	protein phosphorylation	BP	ANIA_00144 | ANIA_01097 | ANIA_01171 | ANIA_02265 | ANIA_03001 | ANIA_03102 | ANIA_03422 | ANIA_03946 | ANIA_04196 | ANIA_04322 | ANIA_05494 | ANIA_05674 | ANIA_05759 | ANIA_05973 | ANIA_06192 | ANIA_06508 | ANIA_06758 | ANIA_07563 | ANIA_07572 | ANIA_08830 | ANIA_08836 | ANIA_00106 | ANIA_01280 | ANIA_02943 | ANIA_04279 | ANIA_04483 | ANIA_04536 | ANIA_04563 | ANIA_04887 | ANIA_04935 | ANIA_0566…	9.253664e-7	0.000348246	45 / 101	45 / 2386
GO:0007165	signal transduction	BP	ANIA_00664 | ANIA_01025 | ANIA_02119 | ANIA_02363 | ANIA_03101 | ANIA_03102 | ANIA_03214 | ANIA_03735 | ANIA_04113 | ANIA_04818 | ANIA_04998 | ANIA_05677 | ANIA_06682 | ANIA_06820 | ANIA_07572 | ANIA_09463 | ANIA_00106 | ANIA_02581 | ANIA_02947 | ANIA_04536 | ANIA_05482 | ANIA_05787 | ANIA_07945 | ANIA_03913 | ANIA_02742 | ANIA_04479	2.22697e-06	0.000628562	26 / 48	26 / 2386
GO:0000155	phosphorelay sensor kinase activity	MF	ANIA_02363 | ANIA_03101 | ANIA_03102 | ANIA_03214 | ANIA_04113 | ANIA_04818 | ANIA_06820 | ANIA_02581 | ANIA_07945 | ANIA_04479	5.28646e-05	0.00994736	10 / 13	10 / 2386
GO:0023014	signal transduction by phosphorylation	BP	ANIA_02363 | ANIA_03101 | ANIA_03102 | ANIA_03214 | ANIA_04113 | ANIA_04818 | ANIA_06820 | ANIA_02581 | ANIA_07945 | ANIA_04479	5.28646e-05	0.00994736	10 / 13	10 / 2386
GO:0004674	protein serine/threonine kinase activity	MF	ANIA_00144 | ANIA_01097 | ANIA_01171 | ANIA_02265 | ANIA_03001 | ANIA_03422 | ANIA_03946 | ANIA_05494 | ANIA_05674 | ANIA_05759 | ANIA_05973 | ANIA_06508 | ANIA_06758 | ANIA_07563 | ANIA_07572 | ANIA_08830 | ANIA_08836 | ANIA_00106 | ANIA_02943 | ANIA_04279 | ANIA_04483 | ANIA_04536 | ANIA_04563 | ANIA_04887 | ANIA_04935 | ANIA_05666 | ANIA_06768 | ANIA_06975 | ANIA_07104 | ANIA_00822 | ANIA_0371…	6.39161e-05	0.0103088	34 / 80	34 / 2386
GO:0000160	phosphorelay signal transduction system	BP	ANIA_02363 | ANIA_03101 | ANIA_03102 | ANIA_03214 | ANIA_04113 | ANIA_04818 | ANIA_06820 | ANIA_07572 | ANIA_02581 | ANIA_07945 | ANIA_04479 | ANIA_07697	8.66942e-05	0.0105374	12 / 18	12 / 2386
GO:0004871	signal transducer activity	MF	ANIA_00664 | ANIA_02363 | ANIA_03101 | ANIA_03102 | ANIA_03214 | ANIA_04113 | ANIA_04818 | ANIA_06682 | ANIA_06820 | ANIA_07572 | ANIA_02581 | ANIA_02947 | ANIA_04536 | ANIA_07945 | ANIA_02742 | ANIA_04479	8.73258e-05	0.0105374	16 / 28	16 / 2386
GO:0016301	kinase activity	MF	ANIA_00144 | ANIA_01097 | ANIA_01171 | ANIA_02265 | ANIA_02363 | ANIA_03001 | ANIA_03101 | ANIA_03102 | ANIA_03422 | ANIA_03755 | ANIA_03869 | ANIA_03916 | ANIA_04255 | ANIA_04278 | ANIA_04322 | ANIA_04818 | ANIA_05211 | ANIA_05494 | ANIA_05674 | ANIA_05751 | ANIA_05759 | ANIA_05973 | ANIA_06192 | ANIA_06820 | ANIA_07563 | ANIA_07572 | ANIA_07681 | ANIA_08836 | ANIA_09461 | ANIA_00106 | ANIA_0191…	0.000100918	0.0105374	56 / 155	56 / 2386
GO:0016310	phosphorylation	BP	ANIA_00144 | ANIA_01097 | ANIA_01171 | ANIA_02265 | ANIA_02363 | ANIA_03001 | ANIA_03101 | ANIA_03102 | ANIA_03214 | ANIA_03422 | ANIA_03755 | ANIA_03869 | ANIA_03916 | ANIA_04113 | ANIA_04255 | ANIA_04278 | ANIA_04322 | ANIA_04818 | ANIA_05211 | ANIA_05494 | ANIA_05674 | ANIA_05751 | ANIA_05759 | ANIA_05973 | ANIA_06192 | ANIA_06820 | ANIA_07563 | ANIA_07572 | ANIA_07681 | ANIA_08836 | ANIA_0946…	0.000102667	0.0105374	60 / 169	60 / 2386
GO:0005524	ATP binding	MF	ANIA_00133 | ANIA_00144 | ANIA_00228 | ANIA_00314 | ANIA_00858 | ANIA_01097 | ANIA_01163 | ANIA_01171 | ANIA_01189 | ANIA_01222 | ANIA_01708 | ANIA_02087 | ANIA_02255 | ANIA_02256 | ANIA_02265 | ANIA_02278 | ANIA_02435 | ANIA_02450 | ANIA_02827 | ANIA_02963 | ANIA_03001 | ANIA_03102 | ANIA_03117 | ANIA_03247 | ANIA_03422 | ANIA_03608 | ANIA_03624 | ANIA_03811 | ANIA_03869 | ANIA_03946 | ANIA_0395…	0.000122968	0.0115692	131 / 432	131 / 2386
GO:0042555	MCM complex	CC	ANIA_00228 | ANIA_05992 | ANIA_06070 | ANIA_07994 | ANIA_02491 | ANIA_10497	0.000138737	0.0120488	6 / 6	6 / 2386
GO:0006270	DNA replication initiation	BP	ANIA_00228 | ANIA_05992 | ANIA_06070 | ANIA_07994 | ANIA_02491 | ANIA_10497 | ANIA_10755	0.000202075	0.0162959	7 / 8	7 / 2386
GO:0000166	nucleotide binding	MF	ANIA_00133 | ANIA_00228 | ANIA_00314 | ANIA_00858 | ANIA_00917 | ANIA_01097 | ANIA_01163 | ANIA_01171 | ANIA_01189 | ANIA_01222 | ANIA_01309 | ANIA_01322 | ANIA_01408 | ANIA_01708 | ANIA_02087 | ANIA_02827 | ANIA_03117 | ANIA_03247 | ANIA_03422 | ANIA_03434 | ANIA_03608 | ANIA_03624 | ANIA_03869 | ANIA_03952 | ANIA_04038 | ANIA_04255 | ANIA_04330 | ANIA_04398 | ANIA_04517 | ANIA_04616 | ANIA_0469…	0.000537134	0.0404283	122 / 411	122 / 2386
GO:0019829	cation-transporting ATPase activity	MF	ANIA_01189 | ANIA_02827 | ANIA_03117 | ANIA_03624 | ANIA_04859 | ANIA_05088 | ANIA_06112 | ANIA_06642 | ANIA_08219 | ANIA_08399 | ANIA_08941 | ANIA_10982	0.000684845	0.0478652	12 / 21	12 / 2386
GO:0006260	DNA replication	BP	ANIA_00228 | ANIA_02087 | ANIA_03033 | ANIA_04380 | ANIA_05992 | ANIA_06070 | ANIA_06300 | ANIA_06303 | ANIA_07325 | ANIA_07439 | ANIA_07994 | ANIA_02491 | ANIA_02969 | ANIA_06069 | ANIA_07423 | ANIA_10497 | ANIA_10755 | ANIA_10855	0.000720733	0.0478652	18 / 38	18 / 2386
GO:0003678	DNA helicase activity	MF	ANIA_00228 | ANIA_05992 | ANIA_06070 | ANIA_07994 | ANIA_02491 | ANIA_10497	0.000782012	0.0490495	6 / 7	6 / 2386
KEGG
KEGG pathway ID	KEGG pathway name	KEGG main category	Gene ID(s)	Exact p-value	Adjusted p-value	# genes / category	# genes / input
3030	DNA replication	Genetic Information Processing	AN0228.2 | AN0260.2 | AN2491.2 | AN2969.2 | AN3033.2 | AN3067.2 | AN5992.2 | AN6069.2 | AN6070.2 | AN6300.2 | AN6303.2 | AN6517.2 | AN7325.2 | AN7423.2 | AN7439.2 | AN7994.2	2.40702e-06	0.000240702	16 / 25	16 / 2386
4011	MAPK signaling pathway - yeast	Environmental Information Processing	AN0931.2 | AN1800.2 | AN2067.2 | AN2290.2 | AN2742.2 | AN3422.2 | AN4887.2 | AN5499.2 | AN5660.2 | AN5666.2 | AN6523.2 | AN7487.2 | AN7697.2 | AN7698.2 | AN7743.2	9.89221e-05	0.00494611	15 / 28	15 / 2386
mt vs ct	up-regulated genes	DatfA mutant Cd treated vs. reference strain Cd treated
FunCat
FunCat ID	FunCat description	FunCat main category	Gene ID(s)	Exact p-value	Adjusted p-value	# genes / category	# genes / input
20.01.10	protein transport	Cellular transport, transport facilitation and transport routes	ANIA_00089 | ANIA_00131 | ANIA_00257 | ANIA_00329 | ANIA_00411 | ANIA_00417 | ANIA_00429 | ANIA_00559 | ANIA_00634 | ANIA_00643 | ANIA_00665 | ANIA_00770 | ANIA_00847 | ANIA_00880 | ANIA_01075 | ANIA_01105 | ANIA_01126 | ANIA_01154 | ANIA_01341 | ANIA_01385 | ANIA_01442 | ANIA_01892 | ANIA_02048 | ANIA_02120 | ANIA_02164 | ANIA_02222 | ANIA_02418 | ANIA_02439 | ANIA_02521 | ANIA_02874 | ANIA_0308…	3.51877e-06	0.00159888	85 / 217	85 / 2487
1.01	amino acid metabolism	Metabolism	ANIA_00009 | ANIA_00270 | ANIA_00354 | ANIA_00675 | ANIA_00681 | ANIA_00688 | ANIA_00717 | ANIA_00720 | ANIA_00797 | ANIA_00840 | ANIA_01059 | ANIA_01150 | ANIA_01541 | ANIA_01673 | ANIA_01780 | ANIA_01883 | ANIA_02091 | ANIA_02508 | ANIA_02882 | ANIA_03031 | ANIA_03096 | ANIA_03378 | ANIA_03456 | ANIA_03641 | ANIA_03677 | ANIA_03888 | ANIA_03972 | ANIA_04050 | ANIA_04174 | ANIA_04217 | ANIA_0432…	5.8247e-06	0.00159888	83 / 213	83 / 2487
20.09.07.03	ER to Golgi transport	Cellular transport, transport facilitation and transport routes	ANIA_00411 | ANIA_01069 | ANIA_01117 | ANIA_01154 | ANIA_01845 | ANIA_02222 | ANIA_02738 | ANIA_03080 | ANIA_03098 | ANIA_04165 | ANIA_04281 | ANIA_04287 | ANIA_04317 | ANIA_04332 | ANIA_04446 | ANIA_05020 | ANIA_05127 | ANIA_05195 | ANIA_05915 | ANIA_06267 | ANIA_06307 | ANIA_07254 | ANIA_07302 | ANIA_07311 | ANIA_07602 | ANIA_07679 | ANIA_08828 | ANIA_09086 | ANIA_09526 | ANIA_10724 | ANIA_11500	5.25595e-05	0.0096105	31 / 64	31 / 2487
14.07.02.02	N-directed glycosylation, deglycosylation	Protein fate (folding, modification, destination)	ANIA_00086 | ANIA_00104 | ANIA_01455 | ANIA_01620 | ANIA_01683 | ANIA_02626 | ANIA_04683 | ANIA_04716 | ANIA_04947 | ANIA_05346 | ANIA_05748 | ANIA_05888 | ANIA_06170 | ANIA_06610 | ANIA_06874 | ANIA_07472 | ANIA_07534 | ANIA_07672 | ANIA_07715 | ANIA_08119 | ANIA_08986 | ANIA_10496 | ANIA_10702	7.00219e-05	0.0096105	23 / 43	23 / 2487
12.1	aminoacyl-tRNA-synthetases	Protein synthesis	ANIA_00046 | ANIA_00057 | ANIA_00428 | ANIA_00705 | ANIA_01380 | ANIA_02150 | ANIA_03073 | ANIA_03824 | ANIA_04086 | ANIA_04584 | ANIA_05662 | ANIA_06253 | ANIA_07321 | ANIA_07479 | ANIA_08224 | ANIA_08800 | ANIA_09157 | ANIA_09419 | ANIA_10195 | ANIA_10393 | ANIA_10475 | ANIA_11125	9.43951e-05	0.0102011	22 / 41	22 / 2487
14.04	protein targeting, sorting and translocation	Protein fate (folding, modification, destination)	ANIA_00084 | ANIA_00131 | ANIA_00295 | ANIA_00417 | ANIA_00429 | ANIA_00559 | ANIA_00643 | ANIA_00722 | ANIA_00770 | ANIA_00847 | ANIA_00880 | ANIA_01023 | ANIA_01105 | ANIA_01223 | ANIA_01229 | ANIA_01341 | ANIA_01442 | ANIA_01565 | ANIA_01845 | ANIA_01892 | ANIA_02048 | ANIA_02062 | ANIA_02120 | ANIA_02164 | ANIA_02418 | ANIA_02432 | ANIA_02438 | ANIA_02439 | ANIA_02480 | ANIA_03088 | ANIA_0314…	0.000124582	0.0102011	101 / 289	101 / 2487
01.07.01	biosynthesis of vitamins, cofactors, and prosthetic groups	Metabolism	ANIA_00110 | ANIA_00121 | ANIA_00193 | ANIA_00205 | ANIA_00554 | ANIA_00591 | ANIA_00654 | ANIA_00856 | ANIA_01195 | ANIA_01430 | ANIA_01524 | ANIA_01694 | ANIA_01704 | ANIA_01722 | ANIA_01743 | ANIA_01745 | ANIA_01823 | ANIA_01999 | ANIA_02284 | ANIA_02327 | ANIA_02964 | ANIA_03031 | ANIA_03168 | ANIA_03431 | ANIA_03695 | ANIA_03728 | ANIA_03778 | ANIA_04231 | ANIA_04714 | ANIA_04774 | ANIA_0484…	0.000141246	0.0102011	60 / 155	60 / 2487
14.07.02	modification with sugar residues (e.g. glycosylation, deglycosylation)	Protein fate (folding, modification, destination)	ANIA_00086 | ANIA_00104 | ANIA_00210 | ANIA_00667 | ANIA_00787 | ANIA_01082 | ANIA_01126 | ANIA_01455 | ANIA_01620 | ANIA_01683 | ANIA_02626 | ANIA_03566 | ANIA_04683 | ANIA_04716 | ANIA_04947 | ANIA_05346 | ANIA_06857 | ANIA_06874 | ANIA_07462 | ANIA_07472 | ANIA_07534 | ANIA_07672 | ANIA_07715 | ANIA_08119 | ANIA_08986 | ANIA_09148	0.000160505	0.0102011	26 / 53	26 / 2487
14.13.01.01	proteasomal degradation (ubiquitin/proteasomal pathway)	Protein fate (folding, modification, destination)	ANIA_00084 | ANIA_00295 | ANIA_00329 | ANIA_00770 | ANIA_00810 | ANIA_00927 | ANIA_01488 | ANIA_01539 | ANIA_01757 | ANIA_01922 | ANIA_02085 | ANIA_02212 | ANIA_02521 | ANIA_02874 | ANIA_02904 | ANIA_03019 | ANIA_03449 | ANIA_03644 | ANIA_03646 | ANIA_03689 | ANIA_03756 | ANIA_03787 | ANIA_03999 | ANIA_04236 | ANIA_04317 | ANIA_04449 | ANIA_04457 | ANIA_04492 | ANIA_04731 | ANIA_04869 | ANIA_0512…	0.000167231	0.0102011	61 / 159	61 / 2487
20.09.04	mitochondrial transport	Cellular transport, transport facilitation and transport routes	ANIA_00257 | ANIA_00346 | ANIA_00429 | ANIA_00559 | ANIA_01059 | ANIA_01105 | ANIA_01534 | ANIA_01795 | ANIA_01892 | ANIA_02173 | ANIA_03359 | ANIA_03663 | ANIA_03690 | ANIA_04068 | ANIA_04402 | ANIA_05343 | ANIA_05356 | ANIA_05633 | ANIA_05693 | ANIA_06087 | ANIA_06254 | ANIA_06306 | ANIA_06348 | ANIA_06510 | ANIA_06631 | ANIA_06690 | ANIA_06841 | ANIA_07254 | ANIA_07304 | ANIA_07569 | ANIA_0764…	0.000217383	0.0119343	46 / 113	46 / 2487
01.01.06.05.01	biosynthesis of methionine	Metabolism	ANIA_00681 | ANIA_01194 | ANIA_01769 | ANIA_02042 | ANIA_02229 | ANIA_03378 | ANIA_05019 | ANIA_06576 | ANIA_07051 | ANIA_08565 | ANIA_08859 | ANIA_11168	0.000259971	0.0120364	12 / 18	12 / 2487
01.01.06.04.01	biosynthesis of threonine	Metabolism	ANIA_02525 | ANIA_02882 | ANIA_03031 | ANIA_03456 | ANIA_08843 | ANIA_08859	0.000263091	0.0120364	6 / 6	6 / 2487
20.03.22	transport ATPases	Cellular transport, transport facilitation and transport routes	ANIA_00110 | ANIA_00771 | ANIA_00943 | ANIA_01195 | ANIA_01534 | ANIA_01624 | ANIA_02300 | ANIA_02349 | ANIA_02669 | ANIA_02909 | ANIA_03088 | ANIA_03131 | ANIA_03168 | ANIA_03329 | ANIA_04718 | ANIA_04912 | ANIA_04927 | ANIA_05350 | ANIA_05743 | ANIA_05880 | ANIA_06127 | ANIA_06237 | ANIA_06397 | ANIA_06436 | ANIA_06631 | ANIA_07029 | ANIA_07254 | ANIA_07464 | ANIA_07603 | ANIA_07877 | ANIA_0802…	0.000310201	0.0130142	40 / 96	40 / 2487
42.16	mitochondrion	Biogenesis of cellular components	ANIA_00123 | ANIA_00293 | ANIA_00429 | ANIA_00476 | ANIA_00554 | ANIA_00559 | ANIA_00726 | ANIA_00789 | ANIA_01689 | ANIA_01970 | ANIA_02432 | ANIA_02900 | ANIA_02987 | ANIA_03131 | ANIA_03205 | ANIA_03649 | ANIA_04050 | ANIA_04304 | ANIA_04402 | ANIA_04613 | ANIA_05203 | ANIA_05440 | ANIA_05693 | ANIA_05741 | ANIA_05786 | ANIA_05828 | ANIA_06146 | ANIA_06149 | ANIA_06225 | ANIA_06290 | ANIA_0630…	0.000331875	0.0130142	59 / 156	59 / 2487
01.03.01.03	purine nucleotide/nucleoside/nucleobase anabolism	Metabolism	ANIA_00110 | ANIA_00495 | ANIA_00797 | ANIA_00893 | ANIA_01195 | ANIA_01524 | ANIA_03168 | ANIA_03626 | ANIA_04011 | ANIA_04739 | ANIA_05566 | ANIA_07430 | ANIA_08121 | ANIA_08216 | ANIA_10298 | ANIA_10753 | ANIA_10837	0.000421265	0.0154183	17 / 31	17 / 2487
02.45.15	energy generation (e.g. ATP synthase)	Energy	ANIA_00110 | ANIA_00943 | ANIA_01195 | ANIA_01534 | ANIA_01624 | ANIA_03168 | ANIA_05880 | ANIA_06631 | ANIA_07603 | ANIA_10032 | ANIA_11303 | ANIA_11444 | ANIA_11565	0.000788661	0.0270609	13 / 22	13 / 2487
GO
GO ID	GO name	GO namespace	Gene ID(s)	Exact p-value	Adjusted p-value	# genes / category	# genes / input
GO:0000502	proteasome complex	CC	ANIA_00927 | ANIA_01757 | ANIA_01922 | ANIA_02085 | ANIA_03756 | ANIA_04449 | ANIA_04731 | ANIA_05793 | ANIA_05872 | ANIA_06547 | ANIA_06726 | ANIA_07579 | ANIA_08253 | ANIA_01245 | ANIA_02904 | ANIA_03019 | ANIA_04457 | ANIA_04492 | ANIA_04869 | ANIA_08054 | ANIA_10519 | ANIA_10708	4.383693e-8	4.86179e-05	22 / 32	22 / 2487
GO:0005737	cytoplasm	CC	ANIA_00057 | ANIA_00167 | ANIA_00240 | ANIA_00395 | ANIA_00428 | ANIA_00705 | ANIA_00912 | ANIA_01380 | ANIA_01757 | ANIA_01823 | ANIA_02085 | ANIA_02150 | ANIA_02389 | ANIA_02432 | ANIA_02516 | ANIA_03059 | ANIA_03112 | ANIA_03756 | ANIA_03823 | ANIA_03824 | ANIA_03999 | ANIA_04236 | ANIA_04258 | ANIA_04505 | ANIA_04584 | ANIA_04793 | ANIA_04862 | ANIA_05343 | ANIA_05662 | ANIA_05713 | ANIA_0579…	7.59654e-8	4.86179e-05	77 / 193	77 / 2487
GO:0015078	hydrogen ion transmembrane transporter activity	MF	ANIA_00943 | ANIA_01534 | ANIA_03168 | ANIA_04718 | ANIA_06631 | ANIA_07603 | ANIA_01195 | ANIA_03088 | ANIA_06127 | ANIA_10305 | ANIA_11303 | ANIA_11444	1.17493e-06	0.000501304	12 / 14	12 / 2487
GO:0004175	endopeptidase activity	MF	ANIA_01757 | ANIA_02085 | ANIA_03756 | ANIA_05793 | ANIA_05872 | ANIA_06547 | ANIA_06726 | ANIA_04457 | ANIA_04869 | ANIA_10708	3.45853e-06	0.000848455	10 / 11	10 / 2487
GO:0051603	proteolysis involved in cellular protein catabolic process	BP	ANIA_01757 | ANIA_02085 | ANIA_03756 | ANIA_04449 | ANIA_05793 | ANIA_05872 | ANIA_06547 | ANIA_06726 | ANIA_04457 | ANIA_04869 | ANIA_08054 | ANIA_10708	4.63999e-06	0.000848455	12 / 15	12 / 2487
GO:0005839	proteasome core complex	CC	ANIA_01757 | ANIA_02085 | ANIA_03756 | ANIA_04449 | ANIA_05793 | ANIA_05872 | ANIA_06547 | ANIA_06726 | ANIA_04457 | ANIA_04869 | ANIA_08054 | ANIA_10708	4.63999e-06	0.000848455	12 / 15	12 / 2487
GO:0004298	threonine-type endopeptidase activity	MF	ANIA_01757 | ANIA_02085 | ANIA_03756 | ANIA_04449 | ANIA_05793 | ANIA_05872 | ANIA_06547 | ANIA_06726 | ANIA_04457 | ANIA_04869 | ANIA_08054 | ANIA_10708	4.63999e-06	0.000848455	12 / 15	12 / 2487
GO:0016740	transferase activity	MF	ANIA_00259 | ANIA_00086 | ANIA_00240 | ANIA_00487 | ANIA_00654 | ANIA_00717 | ANIA_00780 | ANIA_00969 | ANIA_00987 | ANIA_01328 | ANIA_01620 | ANIA_01683 | ANIA_01694 | ANIA_01696 | ANIA_01743 | ANIA_01745 | ANIA_01990 | ANIA_02180 | ANIA_02207 | ANIA_02479 | ANIA_02626 | ANIA_02745 | ANIA_02948 | ANIA_03071 | ANIA_03175 | ANIA_03299 | ANIA_03378 | ANIA_03419 | ANIA_03603 | ANIA_03649 | ANIA_0372…	7.37357e-06	0.00117977	121 / 370	121 / 2487
GO:0019773	proteasome core complex, alpha-subunit complex	CC	ANIA_01757 | ANIA_05793 | ANIA_05872 | ANIA_06547 | ANIA_06726 | ANIA_04869 | ANIA_08054	3.31706e-05	0.00450076	7 / 7	7 / 2487
GO:0005622	intracellular	CC	ANIA_00123 | ANIA_00184 | ANIA_00240 | ANIA_00297 | ANIA_00395 | ANIA_00776 | ANIA_00927 | ANIA_01126 | ANIA_01429 | ANIA_01689 | ANIA_01970 | ANIA_02062 | ANIA_02208 | ANIA_02583 | ANIA_02737 | ANIA_02875 | ANIA_02980 | ANIA_03649 | ANIA_03746 | ANIA_03823 | ANIA_04073 | ANIA_04178 | ANIA_04369 | ANIA_04475 | ANIA_04872 | ANIA_04997 | ANIA_05020 | ANIA_05564 | ANIA_05741 | ANIA_05819 | ANIA_0618…	3.51622e-05	0.00450076	74 / 211	74 / 2487
GO:0006418	tRNA aminoacylation for protein translation	BP	ANIA_00057 | ANIA_00428 | ANIA_00705 | ANIA_01380 | ANIA_02150 | ANIA_03824 | ANIA_05662 | ANIA_07479 | ANIA_09157 | ANIA_00046 | ANIA_03073 | ANIA_06253 | ANIA_08224 | ANIA_08800 | ANIA_10195 | ANIA_10393 | ANIA_10475 | ANIA_11125	4.66491e-05	0.00542826	18 / 32	18 / 2487
GO:0004812	aminoacyl-tRNA ligase activity	MF	ANIA_00057 | ANIA_00428 | ANIA_00705 | ANIA_01380 | ANIA_02150 | ANIA_03824 | ANIA_05662 | ANIA_07479 | ANIA_09157 | ANIA_00046 | ANIA_03073 | ANIA_04086 | ANIA_06253 | ANIA_08224 | ANIA_08800 | ANIA_10195 | ANIA_10393 | ANIA_10475 | ANIA_11125	9.30579e-05	0.00992617	19 / 36	19 / 2487
GO:0030833	regulation of actin filament polymerization	BP	ANIA_00306 | ANIA_05778 | ANIA_00140 | ANIA_00673 | ANIA_04919 | ANIA_08065	0.000144921	0.0142691	6 / 6	6 / 2487
GO:0030170	pyridoxal phosphate binding	MF	ANIA_00681 | ANIA_00717 | ANIA_00780 | ANIA_02508 | ANIA_03031 | ANIA_03728 | ANIA_04156 | ANIA_05426 | ANIA_05616 | ANIA_06227 | ANIA_06338 | ANIA_08709 | ANIA_08899 | ANIA_00744 | ANIA_01150 | ANIA_02091 | ANIA_03456 | ANIA_03830 | ANIA_04217 | ANIA_07017 | ANIA_10298 | ANIA_10299 | ANIA_10619 | ANIA_10745 | ANIA_11168 | ANIA_07051	0.000482134	0.0427635	26 / 61	26 / 2487
GO:0006807	nitrogen compound metabolic process	BP	ANIA_00232 | ANIA_02144 | ANIA_05999 | ANIA_06573 | ANIA_06654 | ANIA_07367 | ANIA_07920 | ANIA_08024 | ANIA_08203 | ANIA_03656 | ANIA_05134 | ANIA_10675 | ANIA_11114	0.000508438	0.0427635	13 / 23	13 / 2487
GO:0015031	protein transport	BP	ANIA_02521 | ANIA_03594 | ANIA_04589 | ANIA_04915 | ANIA_05632 | ANIA_05895 | ANIA_06080 | ANIA_06920 | ANIA_07310 | ANIA_09396 | ANIA_00089 | ANIA_01365 | ANIA_03080 | ANIA_04281 | ANIA_05950 | ANIA_06898 | ANIA_07602 | ANIA_07682 | ANIA_08226 | ANIA_08795 | ANIA_11136	0.000551622	0.0427635	21 / 46	21 / 2487
GO:0006888	ER to Golgi vesicle-mediated transport	BP	ANIA_01229 | ANIA_08828 | ANIA_01845 | ANIA_03080 | ANIA_11500	0.000632916	0.0427635	5 / 5	5 / 2487
GO:0033177	proton-transporting two-sector ATPase complex, proton-transporting domain	CC	ANIA_04718 | ANIA_07603 | ANIA_03088 | ANIA_06127 | ANIA_10305	0.000632916	0.0427635	5 / 5	5 / 2487
GO:0005856	cytoskeleton	CC	ANIA_00306 | ANIA_05778 | ANIA_00140 | ANIA_00673 | ANIA_04919 | ANIA_05082 | ANIA_08065 | ANIA_08698	0.000634771	0.0427635	8 / 11	8 / 2487
KEGG
KEGG pathway ID	KEGG pathway name	KEGG main category	Gene ID(s)	Exact p-value	Adjusted p-value	# genes / category	# genes / input
1230	Biosynthesis of amino acids	Metabolism	AN0240.2 | AN0354.2 | AN0688.2 | AN0717.2 | AN0797.2 | AN0840.2 | AN0912.2 | AN1150.2 | AN1246.2 | AN1673.2 | AN1883.2 | AN1990.2 | AN2293.2 | AN2440.2 | AN2583.2 | AN2875.2 | AN2882.2 | AN2901.2 | AN2914.2 | AN3031.2 | AN3059.2 | AN3456.2 | AN3695.2 | AN3748.2 | AN3830.2 | AN4217.2 | AN4323.2 | AN4355.2 | AN4409.2 | AN4430.2 | AN4462.2 | AN4793.2 | AN4956.2 | AN5134.2 | AN5444.2 | AN5601.2 | AN5…	4.76564e-06	0.000505158	60 / 113	60 / 2487
1100	Metabolic pathways	Metabolism	AN0049.2 | AN0104.2 | AN0110.2 | AN0121.2 | AN0179.2 | AN0192.2 | AN0205.2 | AN0240.2 | AN0259.2 | AN0270.2 | AN0285.2 | AN0300.2 | AN0354.2 | AN0423.2 | AN0443.2 | AN0451.2 | AN0490.2 | AN0554.2 | AN0579.2 | AN0609.2 | AN0654.2 | AN0667.2 | AN0688.2 | AN0717.2 | AN0787.2 | AN0797.2 | AN0827.2 | AN0840.2 | AN0893.2 | AN0910.2 | AN0912.2 | AN0942.2 | AN0943.2 | AN1150.2 | AN1194.2 | AN1195.2 | AN1…	1.05459e-05	0.000558933	262 / 669	262 / 2487
3050	Proteasome	Genetic Information Processing	AN1245.2 | AN1757.2 | AN1922.2 | AN2085.2 | AN2904.2 | AN3019.2 | AN3756.2 | AN4236.2 | AN4449.2 | AN4457.2 | AN4492.2 | AN4731.2 | AN4869.2 | AN5121.2 | AN5747.2 | AN5793.2 | AN5872.2 | AN6547.2 | AN6726.2 | AN7579.2 | AN8054.2	7.52223e-05	0.00265786	21 / 31	21 / 2487
4141	Protein processing in endoplasmic reticulum	Genetic Information Processing	AN0075.2 | AN0248.2 | AN0295.2 | AN0329.2 | AN0411.2 | AN0417.2 | AN0787.2 | AN0810.2 | AN0847.2 | AN1455.2 | AN1461.2 | AN1488.2 | AN1683.2 | AN2062.2 | AN3080.2 | AN3449.2 | AN3592.2 | AN3787.2 | AN4317.2 | AN4589.2 | AN4683.2 | AN5351.2 | AN5451.2 | AN5748.2 | AN6170.2 | AN6307.2 | AN7254.2 | AN7321.2 | AN7338.2 | AN7436.2 | AN7472.2 | AN7704.2 | AN8258.2 | AN8844.2	0.000184881	0.00489934	34 / 61	34 / 2487
