# Supplementary material for: AtfA-Independent Adaptation to the Toxic Heavy Metal Cadmium in Aspergillus nidulans
Source: Microorganisms. 2021 Jul 2;9(7):1433. doi: 10.3390/microorganisms9071433 (PMC8307709; doi:10.3390/microorganisms9071433)
Supplement: Supplementary file 1 [file microorganisms-09-01433-s001.zip › Table S5new.xlsx]

## Sheet: Overview
	Supplementary Table S5 RNAseq data and the results of enrichment analyses of the studied gene groups
	Sheet 1 - Ribosome biogenesis genes
	Sheet 2 - Cell wall homeostasis genes (cell wall biosynthesis and degradation, chitin synthesis and degradation, utilization of chitin monomers, cell wall integrity pathway)
	Sheet 3 - Cd2+ detoxification genes (putative Cd2+ efflux pump genes, P-type ATPase genes, Cys rich protein genes, glyoxylate pathway genes)
	Sheet 4 - S metabolism genes (Cys, Met and GSH metabolism genes, folate cycle genes, Fe-S cluster binding protein genes)
	Sheet 5 - DNA repair genes
	Sheet 6 - Secondary metabolite cluster genes
	Sheet 7 - Other gene groups (squalene - ergosterol pathway genes, autophagy related genes, antioxidant enzyme genes, zinc transporter genes, ER to Golgi vesicle-mediated transport genes, phosphorelay response regulator genes, glycolysis genes)
	Tables contain transcriptional changes (log2FC) values obtained with RNAseq.
	Transcription data of up-regulated and down-regulated genes are marked with red and blue, respectively.
	Enrichment of the studied functionally related genes in the up-regulated, down-regulated, stressresponsive or AtfA-dependent gene sets was studied by Fisher's exact test; p-values smaller than 0.05 are highlighted by yellow.

## Sheet: Ribosome biogenesis genes
Supplementary Table S5 RNAseq data and the results of enrichment analyses of the studied gene groups
Sheet 1 - Ribosome biogenesis genes
Ribosome biogenesis genes
GENE ID	Gene name	Feature (AspGD)	log2FC	adj. p-value	log2FC	adj. p-value	log2FC	adj. p-value	log2FC	adj. p-value
			reference strain, Cd treated vs.	reference strain, untreated	DatfA mutant, Cd treated vs.	DatfA mutant, untreated	DatfA mutant, untreated vs.	reference strain, untreated	DatfA mutant, Cd treated vs.	reference strain, Cd treated
AN0843	AN0843	Ortholog(s) have structural constituent of ribosome activity, role in rRNA export from nucleus and cytosolic small ribosomal subunit, membrane localization	-0.697328	1.48e-05	-1.75159	2.98e-31	0.718761	3.68e-06	-0.335506	0.047692
AN1122	AN1122	Ortholog(s) have role in ribosomal large subunit export from nucleus and cytosolic large ribosomal subunit localization	-0.46473	0.000218069	-1.52258	1.81e-39	0.75918	1.22e-10	-0.298669	0.0200785
AN5520	AN5520	Ortholog(s) have role in maturation of LSU-rRNA and cytosolic large ribosomal subunit localization	-0.56475	0.000437935	-1.6837	4.77e-30	0.662268	1.46e-05	-0.456679	0.00443166
AN8870	AN8870	Expression increased in salt-adapted strains	-0.673123	1.27e-05	-1.72493	6.25e-33	0.660564	9.61e-06	-0.39124	0.0136536
AN0767	AN0767	Ortholog(s) have RNA binding, poly(U) RNA binding activity and role in mRNA splicing, via spliceosome, maturation of SSU-rRNA, nuclear-transcribed mRNA catabolic process	-0.552054	3.65e-06	-0.342627	0.00261655	0.735797	2.4e-11	0.945224	1.83e-17
AN0776	AN0776	Ortholog(s) have structural constituent of ribosome activity and role in cellular response to drug, cleavage in ITS2 between 5.8S rRNA and LSU-rRNA of tricistronic rRNA transcript (SSU-rRNA, 5.8S rRNA, LSU-rRNA), cytoplasmic translation	-0.715023	3.65e-06	-1.40893	4.12e-22	1.03507	1.85e-12	0.341161	0.0351393
AN10348	AN10348	Ortholog(s) have 3'-5'-exoribonuclease activity	-0.547958	0.00104332	-0.410375	0.00273309	1.02499	1.85e-13	1.16257	1.7e-15
AN10719	AN10719	Ortholog(s) have RNA binding, poly(U) RNA binding activity and role in mRNA splicing, via spliceosome, maturation of SSU-rRNA	-0.635155	2.07e-06	-0.489939	0.000127309	0.790226	2.71e-10	0.935442	1.47e-13
AN3706	AN3706	S. cerevisiae ortholog RPS10A has role in rRNA export from nucleus; palA-dependent expression independent of pH	-0.665503	0.000131173	-1.33616	2.06e-16	1.55168	6.83e-22	0.881017	1.24e-07
AN3823	AN3823	Ortholog(s) have structural constituent of ribosome activity	-0.839395	4.06e-08	-1.32841	8.76e-20	1.30951	2.47e-19	0.820495	4.43e-08
AN4475	AN4475	Ortholog(s) have role in ribosomal large subunit assembly and cytosolic large ribosomal subunit localization	-0.362464	0.0134444	-1.02933	5.43e-15	1.00167	2.56e-14	0.334807	0.0199428
AN4872	ubi1	Fusion protein consisting of N-terminal ubiquitin and C-terminal extension protein (CEP) of the small ribosomal subunit; transcript upregulated in response to camptothecin	-0.563606	6.46e-06	-1.01745	7.38e-18	1.14007	2.76e-22	0.686219	1.31e-08
AN0262	AN0262	Ortholog(s) have role in ribosomal large subunit assembly and cytosolic large ribosomal subunit localization	-0.683589	1.44e-06	-1.55257	2.5e-31	0.907849	1.94e-11	0.0388712	0.840534
AN0465	AN0465	Ortholog of S. cerevisiae RPS8A and RPS8B; palA-dependent expression independent of pH	-0.677444	3.34e-05	-1.48544	2.67e-22	0.952295	7.87e-10	0.1443	0.455686
AN1013	AN1013	Putative 60S ribosomal protein L5; ortholog of S. cerevisiae Rpl5p which is an RNA binding protein with a role in ribosomal large subunit assembly	-0.403607	0.0132967	-1.39253	1.19e-21	0.809169	4.77e-08	-0.179749	0.309302
AN1166	AN1166	Ortholog(s) have RNA binding, structural constituent of ribosome activity	-0.641417	1.57e-05	-1.53661	2.01e-28	0.952987	1.33e-11	0.0577981	0.767223
AN1228	AN1228	Ortholog(s) have role in maturation of LSU-rRNA from tricistronic rRNA transcript (SSU-rRNA, 5.8S rRNA, LSU-rRNA) and cytosolic large ribosomal subunit, preribosome, large subunit precursor localization	-0.670403	5.73e-06	-1.55917	2.39e-29	0.934773	2.95e-11	0.0460037	0.817737
AN1345	AN1345	Ortholog(s) have structural constituent of ribosome activity	-0.749169	4.63e-08	-1.45108	8.13e-29	0.797043	1.85e-09	0.0951319	0.5792
AN1964	AN1964	Ortholog of S. cerevisiae RPS6B and RPS6A; palA-dependent expression independent of pH	-0.595883	0.000310649	-1.61946	2.7e-26	0.832556	9.45e-08	-0.19102	0.303519
AN2079	AN2079	Ortholog(s) have role in maturation of SSU-rRNA from tricistronic rRNA transcript (SSU-rRNA, 5.8S rRNA, LSU-rRNA)	-0.378716	0.0314722	-1.51672	4.5e-24	0.978349	8.55e-11	-0.159655	0.412058
AN2734	AN2734	Ortholog(s) have large ribosomal subunit rRNA binding, structural constituent of ribosome activity, role in cytoplasmic translation, ribosomal large subunit assembly and cytoplasm, cytosolic large ribosomal subunit localization	-0.562234	0.000435876	-1.82793	1.17e-35	1.17576	2.03e-15	-0.0899339	0.648466
AN3172	AN3172	Ortholog of S. cerevisiae RPS0A and RPS0B; expression reduced after exposure to farnesol	-0.636458	0.000116442	-1.5909	3.49e-25	0.879868	1.82e-08	-0.0745709	0.725582
AN3413	AN3413	Protein with homology to ribosomal protein S2 and S5; ortholog of S. cerevisiae Rps2p; expression reduced after exposure to farnesol	-0.532564	0.000764882	-1.41854	2.2e-22	0.718759	1.47e-06	-0.167215	0.350582
AN4060	rps16	Putative ribosomal protein S16	-0.661152	1e-05	-1.53133	8.85e-28	1.03369	2.91e-13	0.163507	0.344086
AN4087	AN4087	Putative 40S ribosomal protein subunit; ortholog of S. cerevisiae Rps3p; expression reduced after exposure to farnesol	-0.55174	0.000191486	-1.57316	1.25e-30	0.888696	1.59e-10	-0.132723	0.443894
AN4594	AN4594	Ortholog(s) have role in maturation of SSU-rRNA from tricistronic rRNA transcript (SSU-rRNA, 5.8S rRNA, LSU-rRNA) and cytosolic small ribosomal subunit, hyphal cell wall, yeast-form cell wall localization	-0.664061	0.000109418	-1.58465	3.08e-23	0.923099	1.27e-08	0.00251376	0.991527
AN4777	AN4777	Ortholog(s) have structural constituent of ribosome activity	-0.572248	1.33e-07	-1.16084	1.51e-29	0.468776	1.02e-05	-0.119815	0.344689
AN4803	AN4803	Ortholog(s) have rRNA binding, structural constituent of ribosome activity and role in maturation of SSU-rRNA from tricistronic rRNA transcript (SSU-rRNA, 5.8S rRNA, LSU-rRNA), positive regulation of translational fidelity	-0.474053	0.00370941	-1.40378	2.97e-21	0.925545	7e-10	-0.00418426	0.985374
AN4916	AN4916	Ortholog(s) have role in ribosome biogenesis and cell surface, small-subunit processome localization	-0.658041	0.000191605	-1.64288	1.1e-23	0.782594	3.26e-06	-0.202241	0.309868
AN5222	AN5222	Ortholog(s) have structural constituent of ribosome activity and role in maturation of SSU-rRNA from tricistronic rRNA transcript (SSU-rRNA, 5.8S rRNA, LSU-rRNA), ribosomal small subunit assembly	-0.591468	0.000107711	-1.51835	9.19e-27	0.889477	6.59e-10	-0.0374066	0.855682
AN5441	AN5441	Ortholog(s) have role in endonucleolytic cleavage in ITS1 to separate SSU-rRNA from 5.8S rRNA and LSU-rRNA from tricistronic rRNA transcript (SSU-rRNA, 5.8S rRNA, LSU-rRNA), rRNA export from nucleus	-0.695235	6.86e-07	-1.67419	5.54e-37	1.01002	3.57e-14	0.0310625	0.872751
AN5715	AN5715	Putative 40s ribosomal protein S26; ortholog of S. cerevisiae Rps26Bp which has role in rRNA export from nucleus; expression reduced after exposure to farnesol	-0.86395	1.54e-08	-1.65024	7.65e-30	0.741668	6.78e-07	-0.04462	0.831649
AN5910	AN5910	Ortholog(s) have RNA polymerase II C-terminal domain phosphoserine binding, RNA polymerase II complex binding, chromatin binding activity	-0.289419	0.039386	-0.822995	1.89e-11	0.331242	0.00959061	-0.202333	0.160264
AN5960	AN5960	Ortholog(s) have mRNA binding activity and role in maturation of SSU-rRNA from tricistronic rRNA transcript (SSU-rRNA, 5.8S rRNA, LSU-rRNA), ribosomal small subunit assembly	-0.433794	0.000875278	-1.37543	7.67e-31	1.08447	1.28e-19	0.142835	0.329131
AN5979	AN5979	Ortholog(s) have role in ribosomal small subunit assembly	-0.634384	6.62e-05	-1.34427	1.53e-19	1.03453	4.75e-12	0.32465	0.0510525
AN5997	AN5997	Ortholog(s) have role in rRNA export from nucleus	-0.655632	5.64e-06	-1.36146	1.37e-23	0.800189	7.09e-09	0.0943605	0.599392
AN6082	AN6082	Ortholog(s) have RNA binding, pre-mRNA 5'-splice site binding, structural constituent of ribosome activity and role in negative regulation of mRNA splicing, via spliceosome, rRNA processing	-0.281557	0.0239464	-1.0013	9.8e-20	0.930121	3.2e-17	0.210376	0.0937057
AN6202	rpl3	Putative ribosomal protein L3	-0.679728	2.11e-05	-1.7898	3.9e-33	0.873437	1e-08	-0.236639	0.1782
AN6632	AN6632	Putative 40S ribosomal protein S28; ortholog of S. cerevisiae Rps28Bp; expression reduced after exposure to farnesol	-0.670579	6.14e-05	-1.55647	1.91e-23	0.930904	4.16e-09	0.0450173	0.841017
AN6679	AN6679	Ortholog(s) have small ribosomal subunit rRNA binding, structural constituent of ribosome activity and role in maturation of SSU-rRNA from tricistronic rRNA transcript (SSU-rRNA, 5.8S rRNA, LSU-rRNA)	-0.610302	3.69e-05	-1.33609	5.15e-22	0.718249	3.8e-07	-0.00754206	0.970529
AN7107	AN7107	Ortholog(s) have role in endonucleolytic cleavage in ITS1 to separate SSU-rRNA from 5.8S rRNA and LSU-rRNA from tricistronic rRNA transcript (SSU-rRNA, 5.8S rRNA, LSU-rRNA), endonucleolytic cleavage involved in tRNA processing	-0.537188	0.000415178	-1.50283	8.12e-27	0.717843	5.86e-07	-0.2478	0.126759
AN8856	AN8856	Ortholog(s) have RNA binding activity, role in ribosomal large subunit assembly and cytosolic large ribosomal subunit, preribosome, large subunit precursor localization	-0.508289	0.000161481	-1.40831	1.32e-29	0.771683	1.17e-09	-0.128339	0.412058
AN9097	AN9097	Ortholog(s) have role in maturation of SSU-rRNA from tricistronic rRNA transcript (SSU-rRNA, 5.8S rRNA, LSU-rRNA)	-0.571657	2.29e-05	-1.24936	4.92e-23	0.8951	2.28e-12	0.217395	0.138054
AN9468	AN9468	Ortholog(s) have role in maturation of SSU-rRNA from tricistronic rRNA transcript (SSU-rRNA, 5.8S rRNA, LSU-rRNA)	-0.675095	6.17e-06	-1.5066	6.54e-27	0.917975	1.1e-10	0.0864685	0.645441
AN10940	AN10940	Ortholog(s) have rRNA (uridine-2'-O-)-methyltransferase activity, role in rRNA methylation and mitochondrion localization	-0.575226	9.98e-05	-0.27898	0.054484	0.0772139	0.633279	0.37346	0.012175
AN20049	L-rRNA	Mitochondrial large ribosomal RNA	-1.35174	0.000866558	-0.2299	0.636571	-1.05111	0.00807054	0.0707327	0.899701
AN0074	AN0074	Ortholog(s) have role in nuclear division, rRNA processing, ribosomal large subunit biogenesis and nuclear periphery, nucleolus, preribosome, large subunit precursor localization	0.568587	8.67e-05	-0.645264	2.88e-06	0.790255	7.87e-09	-0.423596	0.00330288
AN0247	AN0247	Ortholog(s) have rRNA cytidine N-acetyltransferase activity, snoRNA binding, tRNA binding activity and role in rRNA acetylation involved in maturation of SSU-rRNA, ribosomal small subunit biogenesis	0.568813	0.00101804	-0.73475	6.09e-06	0.833298	2.65e-07	-0.470264	0.00581935
AN10058	AN10058	Ortholog(s) have role in cellular response to drug, protein-RNA complex remodeling, ribosomal large subunit assembly and nucleolus localization	0.953702	4.77e-11	-0.544829	0.00010569	0.898374	2.27e-10	-0.600156	1.92e-05
AN10200	rpf2	Ribosome assembly factor; component of the Rpf2-Rrs1 complex; ortholog of S. cerevisiae Rpf2p; expression reduced after exposure to farnesol	0.416008	0.0018451	-1.10504	4.51e-20	0.861853	1.5e-12	-0.659191	1.34e-07
AN1215	AN1215	Putative GTPase; S. cerevisiae ortholog Nug1p has role in rRNA processing; expression reduced after exposure to farnesol	0.522706	6.31e-05	-0.676236	3.41e-08	0.913339	7.51e-14	-0.285604	0.0324701
AN1367	bop1	Putative WD40 repeat nucleolar protein; ortholog of S. cerevisiae Erb1p which has role in rRNA processing and ribosomal large subunit biogenesis; expression reduced after exposure to farnesol	0.562767	0.00118631	-0.664658	5.04e-05	0.87046	7.67e-08	-0.356965	0.0428
AN1949	AN1949	Ortholog(s) have RNA binding, RNA helicase activity, RNA-dependent ATPase activity	0.48773	0.000156578	-0.574072	2.44e-06	0.781341	1.01e-10	-0.280461	0.0329358
AN3176	spb4	ATP-dependent rRNA helicase	1.11593	8.1e-09	-0.590622	0.0018372	1.14929	9.3e-10	-0.55726	0.00388375
AN3827	AN3827	Ortholog(s) have nucleolus localization	0.709962	6.37e-07	-0.814371	2.33e-09	1.07376	2.28e-15	-0.450574	0.00168409
AN4469	AN4469	Ortholog(s) have role in cellular response to biotic stimulus, cellular response to starvation, chromosome organization and filamentous growth, more	0.831249	3.11e-09	-0.588257	1.61e-05	0.733648	9.35e-08	-0.685859	4.17e-07
AN4471	AN4471	Ortholog(s) have role in maturation of 5.8S rRNA from tricistronic rRNA transcript (SSU-rRNA, 5.8S rRNA, LSU-rRNA), maturation of LSU-rRNA from tricistronic rRNA transcript (SSU-rRNA, 5.8S rRNA and LSU-rRNA), more	0.696677	6.75e-06	-0.327075	0.0382281	0.660369	1.11e-05	-0.363383	0.0214124
AN4616	ssz1	Putative 70 kilodalton heat shock protein; protein induced by farnesol	0.596439	2.1e-07	-0.717826	7.3e-11	0.836716	2.51e-14	-0.477549	2.62e-05
AN5455	AN5455	Ortholog(s) have U3 snoRNA binding activity	0.555763	2.33e-05	-0.8535	5.97e-12	0.676308	6.86e-08	-0.732955	5.23e-09
AN5865	AN5865	Putative GTP-binding protein; S. cerevisiae ortholog Nog1p has role in ribosomal subunit export from nucleus, ribosomal large subunit biogenesis and rRNA processing; expression reduced after exposure to farnesol	0.480234	0.000115584	-0.715603	8.2e-10	0.928975	1.13e-15	-0.266862	0.036816
AN6200	AN6200	Putative ortholog of S. cerevisiae Rrp12p; expression reduced after exposure to farnesol	0.467837	0.00203655	-1.13084	3.98e-16	0.729607	2.24e-07	-0.869071	7.78e-10
AN6334	AN6334	Has domain(s) with predicted GTP binding, GTPase activity, role in SRP-dependent cotranslational protein targeting to membrane, ribosome biogenesis and nucleus localization	0.374632	0.00126161	-0.776427	1.65e-13	0.790194	1.04e-13	-0.360865	0.00132082
AN6585	AN6585	Ortholog(s) have RNA helicase activity, role in maturation of SSU-rRNA from tricistronic rRNA transcript (SSU-rRNA, 5.8S rRNA, LSU-rRNA), ribosome biogenesis and nucleolus, small-subunit processome localization	0.838011	1.51e-05	-0.556185	0.00361783	0.648192	0.000689566	-0.746003	6.87e-05
AN8073	AN8073	Has domain(s) with predicted RNA binding, S-adenosylmethionine-dependent methyltransferase activity, methyltransferase activity and role in rRNA processing	0.57902	5.28e-06	-0.49487	5.93e-05	0.707559	5.95e-09	-0.366331	0.00418417
AN1200	AN1200	Ortholog(s) have role in cellular response to drug, ribosomal large subunit assembly, ribosomal large subunit biogenesis and Noc1p-Noc2p complex, nucleolus, preribosome, large subunit precursor localization	0.409613	0.00154168	-0.343349	0.00701718	0.089013	0.534402	-0.663949	4.46e-08
AN7674	AN7674	Ortholog(s) have role in ribosomal large subunit biogenesis and nucleolus, nucleus, preribosome, large subunit precursor localization	0.530803	0.0270501	-0.495862	0.0228513	1.61813	9.65e-15	0.591468	0.007501
AN0092	AN0092	Putative methyltransferase with a predicted role in histidine metabolism	0.455165	0.00229446	-0.391832	0.00615482	0.82357	2.04e-09	-0.0234264	0.908832
AN10618	AN10618	Ortholog(s) have RNA binding activity	0.731561	6.9e-06	-0.482917	0.00223706	0.890743	9.61e-09	-0.323735	0.0532968
AN1175	AN1175	Has domain(s) with predicted role in rRNA processing and preribosome, small subunit precursor localization	0.931792	3.19e-09	-0.339585	0.0345535	0.964094	2.69e-10	-0.307283	0.0626833
AN11773	AN11773	Ortholog(s) have 3'-5'-exoribonuclease activity, exoribonuclease activity	0.696627	0.00100223	-0.454102	0.0296866	0.835639	3.05e-05	-0.315091	0.156733
AN1319	AN1319	Ortholog(s) have RNA binding, U3 snoRNA binding, U4 snRNA binding activity	0.58936	1.73e-08	-0.594824	2.81e-09	1.01699	1.05e-24	-0.167196	0.143698
AN1445	AN1445	Ortholog(s) have protein-histidine N-methyltransferase activity and role in peptidyl-histidine methylation, to form tele-methylhistidine, positive regulation of translational fidelity, ribosomal large subunit assembly	0.441597	0.00368285	-0.438221	0.000767616	1.1034	1.67e-16	0.223585	0.131593
AN3313	AN3313	Putative methyltransferase with a predicted role in histidine metabolism; ribosomal RNA adenine dimethylase; expression reduced after exposure to farnesol	0.782075	6.23e-06	-0.340912	0.0467781	1.18363	3.78e-13	0.0606465	0.782866
AN3745	rrs1	Ribosome assembly factor; component of the Rpf2-Rrs1 complex	0.593554	0.000652906	-0.534615	0.00113797	1.37545	5.79e-18	0.247285	0.1782
AN4226	AN4226	Ortholog(s) have role in maturation of SSU-rRNA from tricistronic rRNA transcript (SSU-rRNA, 5.8S rRNA, LSU-rRNA) and nucleolus, small-subunit processome localization	0.510073	0.010451	-0.547746	0.00243082	0.97954	4.7e-08	-0.0782798	0.743807
AN4232	AN4232	Ortholog(s) have rRNA binding activity, role in maturation of LSU-rRNA from tricistronic rRNA transcript (SSU-rRNA, 5.8S rRNA, LSU-rRNA), ribosomal large subunit assembly and nucleolus, preribosome, large subunit precursor localization	0.680421	1.44e-05	-0.458724	0.00266387	0.94965	1.61e-10	-0.189495	0.274544
AN4460	AN4460	Putative 18S rRNA processing complex subunit; locus contains the conserved upstream open reading frame (uORF) AN4460-uORF	0.593107	0.000881559	-0.379134	0.0328131	0.649405	0.000134654	-0.322836	0.0790537
AN5177	AN5177	Ortholog(s) have role in ribosomal large subunit biogenesis	0.560876	0.000190805	-0.500622	0.000254904	1.04822	2.99e-14	-0.0132782	0.949695
AN5340	AN5340	Ortholog(s) have role in endonucleolytic cleavage in 5'-ETS of tricistronic rRNA transcript (SSU-rRNA, 5.8S rRNA and LSU-rRNA), more	1.02072	3.23e-12	-0.34119	0.0215667	1.107	6.99e-15	-0.254912	0.102711
AN5789	AN5789	Ortholog(s) have rRNA (guanine) methyltransferase activity	0.428146	0.0010408	-0.285468	0.0192683	0.943453	1.47e-15	0.22984	0.076312
AN5875	AN5875	Ortholog(s) have role in endonucleolytic cleavage in ITS1 to separate SSU-rRNA from 5.8S rRNA and LSU-rRNA from tricistronic rRNA transcript (SSU-rRNA, 5.8S rRNA, LSU-rRNA), rRNA processing, ribosomal small subunit biogenesis	0.594284	9.11e-07	-0.296452	0.014746	0.727759	3.39e-10	-0.162976	0.221214
AN6171	AN6171	Ortholog(s) have snoRNA binding activity, role in rRNA processing, ribosomal small subunit biogenesis and Mpp10 complex, small-subunit processome localization	0.510454	0.000750394	-0.479875	0.000586666	0.973648	2.26e-12	-0.0166802	0.937257
AN6374	AN6374	Ortholog(s) have DNA helicase activity, DNA/RNA helicase activity, RNA helicase activity, role in maturation of LSU-rRNA from tricistronic rRNA transcript (SSU-rRNA, 5.8S rRNA, LSU-rRNA) and nucleolus localization	0.756176	3.43e-07	-0.437963	0.00245266	0.922613	7.99e-11	-0.271526	0.0797559
AN6902	AN6902	Protein with a predicted role in mRNA turnover; ortholog of S. cerevisiae Mrt4p; expression reduced after exposure to farnesol	0.710173	2.29e-05	-0.723429	4.27e-06	1.18284	4.89e-14	-0.250762	0.161128
AN7260	AN7260	Ortholog(s) have chromatin binding activity and role in DNA replication initiation, pre-replicative complex assembly involved in nuclear cell cycle DNA replication, rRNA processing, response to drug, ribosomal large subunit biogenesis	0.42235	0.0223736	-0.629653	0.00017819	0.775423	3.4e-06	-0.27658	0.139037
AN7305	AN7305	Ortholog(s) have ATPase activator activity, RNA binding activity	0.352075	0.013662	-0.345953	0.00889583	0.767769	1.94e-09	0.0697414	0.678093
AN7526	AN7526	Ortholog(s) have role in maturation of SSU-rRNA from tricistronic rRNA transcript (SSU-rRNA, 5.8S rRNA, LSU-rRNA), rRNA processing and nucleolus, small-subunit processome localization	0.670847	9.04e-05	-0.427805	0.0112612	1.12995	1.9e-12	0.0312936	0.893607
AN8491	AN8491	Ortholog(s) have role in assembly of large subunit precursor of preribosome, maturation of LSU-rRNA from tricistronic rRNA transcript (SSU-rRNA, 5.8S rRNA, LSU-rRNA), ribosomal large subunit biogenesis	0.813442	1e-07	-0.408998	0.00569072	1.39252	3.09e-22	0.170083	0.317161
AN8668	AN8668	Ortholog(s) have chromatin binding activity	0.485093	0.000252306	-0.340199	0.00493226	1.06978	5.81e-19	0.244485	0.0614285
AN9398	AN9398	Ortholog(s) have snoRNA binding activity	0.52	0.00158616	-0.344388	0.0327608	1.01274	2.2e-11	0.14835	0.423162
AN10139	AN10139	Protein expressed at increased levels in a hapX mutant versus wild-type	2.86506	2.66e-17	1.80694	1.2e-07	-0.299317	0.455713	-1.35744	7.13e-05
AN2263	AN2263	Ortholog(s) have role in ribosomal large subunit assembly, ribosomal subunit export from nucleus and cytoplasm, cytosolic large ribosomal subunit localization	0.402166	0.0162474	0.37406	0.0179892	0.390869	0.014004	0.362763	0.0239334
AN4419	AN4419	Ortholog(s) have preribosome binding, protein tyrosine phosphatase activity	0.599418	0.000403716	1.33988	2.3e-22	0.544167	0.000909093	1.28463	1.16e-20
AN2737	mexA	Ortholog(s) have RNA binding activity and role in mRNA export from nucleus, poly(A)+ mRNA export from nucleus, ribosomal large subunit export from nucleus, ribosomal small subunit export from nucleus	0.371327	0.00704717	0.398605	0.00207917	0.249422	0.0669598	0.276699	0.0415002
AN0728	AN0728	Has domain(s) with predicted snoRNA binding activity and role in ribosome biogenesis, snRNA pseudouridine synthesis	1.30212	4.79e-09	0.503906	0.0251416	0.756293	0.000783642	-0.041918	0.889878
AN1711	AN1711	Ortholog(s) have large ribosomal subunit rRNA binding, ribosomal large subunit binding activity, role in ribosomal large subunit export from nucleus and cytosol localization	0.698199	0.000541804	0.41967	0.038992	0.511911	0.00990991	0.233381	0.295743
AN1875	AN1875	Ortholog(s) have role in budding cell bud growth, mitotic cell cycle, nucleocytoplasmic transport, ribosomal large subunit biogenesis and cytoplasm, preribosome, large subunit precursor localization	0.640559	1.96e-06	0.31933	0.0172659	0.578447	1.03e-05	0.257218	0.0647858
AN11224	AN11224	Ortholog(s) have RNA stem-loop binding, double-stranded RNA binding, double-stranded RNA-specific ribonuclease activity, ribonuclease III activity	0.504041	0.00108575	0.525453	0.000309432	0.068684	0.700479	0.0900965	0.619574
AN5013	AN5013	Ortholog(s) have 3'-5'-exoribonuclease activity	0.601395	0.00359039	0.912835	2.32e-06	-0.327486	0.13392	-0.0160461	0.954377
AN0133	AN0133	Putative mRNA splicing factor ATP-dependent RNA helicase; ortholog of S. cerevisiae Prp43p; expression reduced after exposure to farnesol	0.750747	1.64e-09	-0.152595	0.271962	0.526941	2.03e-05	-0.376401	0.00292086
AN0707	AN0707	Ortholog(s) have 5'-3' exoribonuclease activity, microtubule binding, rRNA binding, recombinase activity	0.604949	2.45e-08	-0.00416066	0.978856	0.164359	0.162277	-0.444751	2.77e-05
AN6067	AN6067	Ortholog(s) have GDP-dissociation inhibitor activity, translation initiation factor activity, translation initiation factor binding activity	0.299738	0.022421	-0.192617	0.147312	-0.0230118	0.87988	-0.515367	2.13e-05
AN6978	rcc1	Putative nucleotide exchange factor involved in nucleocytoplasmic trafficking of macromolecules	0.322016	0.000426344	-0.0879508	0.389681	0.017234	0.876846	-0.392733	7.19e-06
AN6980	nic96	Component of the nuclear pore complex	0.525486	1.99e-06	0.154512	0.199365	0.0594163	0.645589	-0.311558	0.00532008
AN8671	AN8671	Ortholog(s) have 5'-3' DNA helicase activity, 5'-3' DNA/RNA helicase activity, protein domain specific binding activity	0.57575	2.64e-05	0.103394	0.527382	-0.145109	0.346413	-0.617465	2.37e-06
AN0796	AN0796	Has domain(s) with predicted role in rRNA processing and small-subunit processome localization	0.517807	0.0171321	-0.330512	0.101441	1.32503	3.65e-12	0.476711	0.0178431
AN10865	AN10865	Ortholog(s) have endoribonuclease activity	0.427728	0.0298458	0.0982302	0.643559	0.871317	6.41e-07	0.541819	0.00226297
AN6651	AN6651	Ortholog(s) have ATP binding, ATPase activity, ribosome binding, translation termination factor activity and role in poly(A)+ mRNA export from nucleus, regulation of translational termination, ribosomal small subunit biogenesis	0.77531	1.39e-05	0.00334809	0.989575	1.22444	3.71e-13	0.452478	0.012147
AN0237	AN0237	Ortholog(s) have role in maturation of 5.8S rRNA from tricistronic rRNA transcript (SSU-rRNA, 5.8S rRNA, LSU-rRNA), maturation of LSU-rRNA from tricistronic rRNA transcript (SSU-rRNA, 5.8S rRNA, LSU-rRNA) and nucleolus localization	0.58704	0.000163898	-0.249705	0.120894	0.550859	0.000255842	-0.285886	0.0752895
AN0421	AN0421	Ortholog(s) have rRNA primary transcript binding activity	0.440165	0.0389553	-0.399893	0.050747	0.672024	0.000558351	-0.168034	0.475885
AN0475	AN0475	Putative ortholog of S. cerevisiae Utp14p; expression reduced after exposure to farnesol	0.639023	3e-06	-0.0746149	0.649847	0.661719	5.41e-07	-0.051919	0.768761
AN0946	AN0946	Ortholog(s) have role in cellular response to biotic stimulus, cellular response to drug, cellular response to starvation and filamentous growth, more	0.612849	0.000195004	-0.257769	0.13203	0.853743	3.84e-08	-0.016875	0.944001
AN10798	AN10798	Has domain(s) with predicted snoRNA binding activity and role in rRNA processing	0.555953	0.00071992	-0.283396	0.0881195	0.712218	4.37e-06	-0.127132	0.504853
AN10943	AN10943	Ortholog(s) have rRNA binding activity, role in maturation of LSU-rRNA from tricistronic rRNA transcript (SSU-rRNA, 5.8S rRNA, LSU-rRNA), rRNA processing, ribosomal large subunit export from nucleus and nucleolus, nucleus localization	0.938119	2.54e-09	-0.141192	0.430512	0.939804	8.1e-10	-0.139508	0.451495
AN2210	AN2210	Probable ABC-transporter; transcript upregulated in response to camptothecin	0.34591	0.0371808	-0.0770017	0.68672	0.610785	4.94e-05	0.187873	0.282239
AN2292	AN2292	Ortholog(s) have role in maturation of SSU-rRNA from tricistronic rRNA transcript (SSU-rRNA, 5.8S rRNA, LSU-rRNA) and nucleolus localization	0.959303	5.68e-08	-0.271678	0.140017	1.17226	4.57e-12	-0.0587214	0.798585
AN2926	nsa2	Putative 60S ribosomal protein; transcript repressed by light in developmentally competent mycelia	0.716861	2.45e-07	-0.273854	0.0541708	0.891967	2e-11	-0.0987475	0.555577
AN3455	AN3455	Ortholog(s) have role in rRNA processing, response to drug, tRNA export from nucleus and CURI complex, UTP-C complex, nucleolus, small-subunit processome localization	0.485879	0.0126865	0.0522465	0.832006	0.457413	0.0140226	0.0237813	0.929206
AN3812	AN3812	Ortholog(s) have role in U1 snRNA 3'-end processing, U4 snRNA 3'-end processing and U5 snRNA 3'-end processing, more	0.383633	0.0239484	-0.23581	0.165386	0.430103	0.00687123	-0.189339	0.290297
AN4534	AN4534	Has domain(s) with predicted role in rRNA processing	1.25592	2.77e-11	0.186909	0.349552	1.11304	1.89e-09	0.0440357	0.85432
AN4771	AN4771	Putative WD40 repeat protein; expression reduced after exposure to farnesol	0.971555	3.61e-06	-0.154231	0.521046	1.11839	2.64e-08	-0.00739281	0.979253
AN5871	AN5871	Ortholog(s) have rRNA (adenine) methyltransferase activity, rRNA (adenine-N1-)-methyltransferase activity, role in rRNA methylation, rRNA processing, ribosomal large subunit biogenesis and 90S preribosome, nucleolus localization	0.753875	0.000179656	-0.21498	0.323668	0.775665	6.05e-05	-0.19319	0.395772
AN6561	AN6561	Ortholog(s) have role in cleavage involved in rRNA processing, maturation of SSU-rRNA from tricistronic rRNA transcript (SSU-rRNA, 5.8S rRNA, LSU-rRNA), ribosomal small subunit biogenesis and 90S preribosome, nucleolus localization	0.77683	5.99e-06	-0.0679158	0.744777	0.799789	1.35e-06	-0.0449562	0.839147
AN6822	AN6822	Has domain(s) with predicted endonuclease activity, role in rRNA processing and Las1 complex localization	0.757401	3.36e-06	-0.233224	0.12626	1.26122	5.01e-17	0.270598	0.0860324
AN7205	AN7205	Ortholog(s) have unfolded protein binding activity, role in ribosome biogenesis and nucleolus localization	0.65518	2.26e-08	-0.137638	0.284836	0.889046	2.12e-15	0.0962282	0.49122
AN7630	AN7630	Ortholog(s) have unfolded protein binding activity, role in ribosomal large subunit assembly, ribosomal large subunit biogenesis and cytosol localization	0.574554	2.19e-06	0.233305	0.0628892	0.470002	7.77e-05	0.128753	0.351748
AN0685	AN0685	Ortholog(s) have rRNA (uridine-N3-)-methyltransferase activity, role in rRNA base methylation and cytoplasm localization	0.351626	0.0379686	0.190951	0.270856	-0.064507	0.73372	-0.225182	0.184819
AN10352	AN10352	Ortholog(s) have role in rRNA processing and box C/D snoRNP complex, nucleolus, small-subunit processome localization	0.0476814	0.730321	-0.973981	1.03e-23	0.765309	5.22e-15	-0.256353	0.0168897
AN12473	hscA	Putative heat shock protein	-0.103907	0.48238	-1.44417	1e-37	0.784656	6.53e-12	-0.555609	2.3e-06
AN1957	AN1957	Putative methyltransferase with a predicted role in histidine metabolism	0.372152	0.0928571	-0.700549	0.000345925	0.488163	0.0153371	-0.584538	0.00388373
AN3167	nop58	Putative ribosome biogenesis protein; ortholog of S. cerevisiae Nop58p; expression reduced after exposure to farnesol	0.164687	0.211139	-1.00503	1.58e-20	0.761807	2.94e-12	-0.407906	0.000384483
AN5702	AN5702	Ortholog(s) have role in ribosomal large subunit biogenesis, ribosomal small subunit biogenesis and nucleolus localization	0.157415	0.272328	-0.97206	4.61e-17	0.709393	1.38e-09	-0.420082	0.000670633
AN6083	AN6083	Ortholog(s) have role in ribosomal large subunit assembly, translational termination and cell surface, cytosolic large ribosomal subunit localization	-0.0984609	0.418095	-1.02095	2.95e-27	0.698964	2.33e-13	-0.22352	0.0335048
AN7424	AN7424	Putative ATP-dependent RNA helicase; ortholog of S. cerevisiae Dbp3p; expression reduced after exposure to farnesol	0.193469	0.239524	-0.854596	3.24e-10	0.719234	1.46e-07	-0.328831	0.0266689
AN8293	AN8293	Has domain(s) with predicted role in rRNA processing and small-subunit processome localization	0.225158	0.0710093	-0.338543	0.00295072	0.270747	0.0189883	-0.292954	0.0121526
AN8851	swoC	Predicted pseudouridylate synthase, involved in establishment of cell polarity; mutants show defects in anisotropic growth, endocytosis, nuclear distribution and compartmentation; transcript upregulated in response to camptothecin	0.0381675	0.796901	-1.10854	5.46e-28	0.65417	1.81e-10	-0.492534	3.13e-06
AN6310	AN6310	Ortholog(s) have ATPase activity and role in protein-RNA complex remodeling, rRNA processing, regulation of ribosomal subunit export from nucleus, ribosomal large subunit assembly	0.104652	0.473924	-0.999326	8.57e-18	-0.0103486	0.9442	-1.11433	5.15e-22
AN10175	AN10175	Ortholog(s) have role in ribosome biogenesis and cytosol localization	-0.132668	0.287765	-0.224422	0.0368583	0.445386	1.36e-05	0.353633	0.000822844
AN10712	AN10712	Has domain(s) with predicted pseudouridine synthase activity, snoRNA binding activity, role in ribosome biogenesis, snRNA pseudouridine synthesis and box H/ACA snoRNP complex localization	-0.142783	0.163696	-1.05637	1.37e-37	1.36613	1.68e-61	0.452542	2.04e-07
AN11929	AN11929	Ortholog(s) have rRNA binding activity, role in rRNA processing, ribosomal small subunit assembly and CURI complex, UTP-C complex localization	0.186689	0.479524	-0.549738	0.00784995	1.23506	7.69e-10	0.498636	0.0213483
AN1474	AN1474	Has domain(s) with predicted role in ribosome biogenesis and nucleolus localization	0.432879	0.0605006	-0.552243	0.0047753	1.51351	8.96e-15	0.528387	0.0104444
AN4560	AN4560	Putative 60s ribosomal protein; ortholog of S. cerevisiae Rlp24p; expression reduced after exposure to farnesol	0.228614	0.0880483	-0.533347	3.78e-06	1.10143	2.6e-22	0.339468	0.00551252
AN6265	AN6265	Ortholog(s) have role in endonucleolytic cleavage in 5'-ETS of tricistronic rRNA transcript (SSU-rRNA, 5.8S rRNA and LSU-rRNA), more	0.120841	0.673432	-0.857223	3.41e-05	1.57667	1.12e-14	0.598609	0.00643213
AN6612	AN6612	Ortholog(s) have role in maturation of 5.8S rRNA from tricistronic rRNA transcript (SSU-rRNA, 5.8S rRNA, LSU-rRNA), maturation of LSU-rRNA from tricistronic rRNA transcript (SSU-rRNA, 5.8S rRNA and LSU-rRNA), more	0.246634	0.186368	-0.421653	0.00937975	1.04117	1.76e-11	0.372879	0.0266689
AN8247	AN8247	Ortholog(s) have role in maturation of 5.8S rRNA from tricistronic rRNA transcript (SSU-rRNA, 5.8S rRNA, LSU-rRNA), maturation of LSU-rRNA from tricistronic rRNA transcript (SSU-rRNA, 5.8S rRNA, LSU-rRNA)	0.104444	0.722114	-0.682667	0.000968232	1.40707	6.47e-12	0.61996	0.00453027
AN8254	nop10	Putative snoRNP complex protein; ortholog of S. cerevisiae Nop10p; expression reduced after exposure to farnesol	0.184129	0.415138	-0.407499	0.0299669	1.05607	2.31e-09	0.464441	0.0142843
AN0124	rio2	Essential protein kinase;, role in maturation of SSU-rRNA from tricistronic rRNA transcript (SSU-rRNA, 5.8S rRNA, LSU-rRNA); null mutants arrest as short germlings	0.060069	0.807162	-0.529293	0.00257427	0.514299	0.00345494	-0.0750628	0.746298
AN0189	AN0189	Ortholog(s) have role in endonucleolytic cleavage in ITS1 to separate SSU-rRNA from 5.8S rRNA and LSU-rRNA from tricistronic rRNA transcript (SSU-rRNA, 5.8S rRNA, LSU-rRNA), endonucleolytic cleavage involved in tRNA processing	0.227925	0.305574	-0.382499	0.0359822	0.585251	0.00137663	-0.025173	0.924028
AN0305	AN0305	Ortholog(s) have U3 snoRNA binding activity	0.279308	0.165241	-0.681044	6.56e-05	1.13301	1.45e-11	0.172659	0.401804
AN0327	AN0327	Ortholog(s) have 3'-5' DNA helicase activity, 5'-3' DNA helicase activity	0.144607	0.205808	-0.361259	0.000214072	0.310047	0.00166975	-0.195819	0.063148
AN0647	AN0647	Ortholog(s) have rRNA primary transcript binding, single-stranded telomeric DNA binding, snoRNA binding activity, role in rRNA processing, ribosomal small subunit biogenesis and Mpp10 complex, small-subunit processome localization	0.35874	0.0812951	-0.734671	4.08e-05	1.1535	7.21e-11	0.0600888	0.809287
AN0695	AN0695	Putative snoRNP component with a predicted role in ribosomal RNA pseudouridinylation; ortholog of S. cerevisiae Nhp2p; expression reduced after exposure to farnesol	0.0282942	0.870226	-0.970855	5.49e-17	0.933959	9.32e-16	-0.0651907	0.678133
AN0745	AN0745	Putative nucleolar protein; ortholog of S. cerevisiae Nop1p; related to mammalian fibrillarin; expression reduced after exposure to farnesol	0.150466	0.253792	-1.14766	4.01e-27	1.21187	4.24e-30	-0.086257	0.534145
AN10955	AN10955	Ortholog(s) have role in rRNA processing, ribosomal large subunit assembly	0.265688	0.184597	-0.654901	9.86e-05	0.879539	1.45e-07	-0.0410495	0.863053
AN11145	cgrA	Functional ortholog of S. cerevisiae CGR1; nucleolar protein with a predicted role in ribosome biogenesis and rRNA processing	0.174264	0.365587	-0.734177	1.67e-06	1.04033	7.71e-12	0.131883	0.492742
AN1434	AN1434	Ortholog(s) have U3 snoRNA binding activity	0.392685	0.0538657	-0.682306	0.000174175	0.940606	1.6e-07	-0.134384	0.554911
AN1533	AN1533	Ortholog(s) have role in cellular response to drug, endonucleolytic cleavage in 5'-ETS of tricistronic rRNA transcript (SSU-rRNA, 5.8S rRNA and LSU-rRNA), more	0.0610136	0.802708	-0.891608	1.36e-07	0.600464	0.000501951	-0.352157	0.0612837
AN1666	AN1666	Putative nucleolar GTPase; ortholog of S. cerevisiae NOG2 which has role in ribosomal large subunit export from nucleus; expression reduced after exposure to farnesol	0.126476	0.48744	-0.772542	3.77e-08	0.983342	1.72e-12	0.0843244	0.647836
AN2759	AN2759	Ortholog(s) have rRNA (pseudouridine) methyltransferase activity	-0.0250182	0.873994	-0.348429	0.00176214	0.35301	0.00145556	0.0295986	0.845997
AN3056	AN3056	Ortholog(s) have role in maturation of SSU-rRNA	0.0748049	0.754353	-0.677081	6.02e-05	0.786881	3.25e-06	0.0349946	0.885859
AN3657	AN3657	Ortholog(s) have 3'-5'-exoribonuclease activity, Ran GTPase binding, endoribonuclease activity, exoribonuclease activity, ribonuclease activity, tRNA binding activity	0.282936	0.0522535	-0.34812	0.00968582	0.395488	0.00301537	-0.235568	0.0999018
AN4298	AN4298	Ortholog(s) have role in endonucleolytic cleavage in 5'-ETS of tricistronic rRNA transcript (SSU-rRNA, 5.8S rRNA and LSU-rRNA), more	0.141622	0.532043	-0.541793	0.00227217	0.872849	4.51e-07	0.189434	0.362658
AN4599	AN4599	Ortholog(s) have polynucleotide 5'-hydroxyl-kinase activity	0.141301	0.519674	-0.56341	0.000906581	0.43615	0.0122282	-0.268562	0.157993
AN4648	AN4648	Has domain(s) with predicted role in rRNA processing and nucleolus localization	0.25771	0.0579092	-0.649443	2.27e-08	1.02007	1.79e-18	0.11292	0.437076
AN5785	AN5785	Ortholog(s) have unfolded protein binding activity	0.22554	0.186368	-0.479276	0.00112586	0.829762	6.27e-09	0.124947	0.483858
AN6244	AN6244	Ortholog(s) have role in exonucleolytic trimming to generate mature 3'-end of 5.8S rRNA from tricistronic rRNA transcript (SSU-rRNA, 5.8S rRNA, LSU-rRNA), nuclear polyadenylation-dependent tRNA catabolic process, rRNA catabolic process	-0.0204363	0.914987	-0.873334	1.31e-12	0.942944	3.16e-14	0.0900465	0.581744
AN6266	AN6266	Has domain(s) with predicted role in ribosome biogenesis and nucleus localization	0.373811	0.101955	-0.702983	0.000495333	1.08238	4.14e-08	0.00558841	0.985234
AN6556	AN6556	Ortholog(s) have mRNA binding activity	0.0585602	0.837406	-1.09671	4.14e-09	1.10748	5.04e-09	-0.047794	0.862891
AN8805	AN8805	Ortholog(s) have unfolded protein binding activity	0.134934	0.382514	-0.506949	3.27e-05	0.842689	3.03e-12	0.200805	0.146657
AN8834	AN8834	Ortholog(s) have rRNA primary transcript binding activity	0.299619	0.196819	-0.560201	0.00430285	1.26585	3.21e-11	0.406034	0.0529469
AN8849	AN8849	Ortholog(s) have S-adenosylmethionine-dependent methyltransferase activity, rRNA (uridine-N3-)-methyltransferase activity, role in rRNA base methylation and nucleolus localization	-0.299607	0.176776	-0.622551	0.000744556	0.461082	0.014924	0.138138	0.560699
AN8691	AN8691	Ortholog(s) have RNA binding, ribonuclease MRP activity, ribonuclease P activity, tRNA binding activity	0.00324234	0.988839	-0.492495	0.00101156	0.231322	0.146218	-0.264415	0.106449
AN6514	AN6514	Ortholog(s) have GDP binding, RNA pyrophosphohydrolase activity, enzyme regulator activity, phosphodiesterase decapping endonuclease activity	0.278051	0.0860854	0.351264	0.0207088	-0.271374	0.0842042	-0.198161	0.217375
AN5443	AN5443	Ortholog(s) have guanyl-nucleotide exchange factor activity and role in mature ribosome assembly	0.224369	0.057477	-0.102953	0.404333	0.0756431	0.542823	-0.251679	0.0241642
AN10721	AN10721	Ortholog(s) have protein methyltransferase activity, rRNA (guanine) methyltransferase activity, tRNA (guanine-N2-)-methyltransferase activity	-0.0604124	0.790888	-0.0697506	0.725477	0.658126	3.2e-05	0.648788	4.62e-05
AN11250	AN11250	Ortholog(s) have role in exonucleolytic trimming to generate mature 3'-end of 5.8S rRNA from tricistronic rRNA transcript (SSU-rRNA, 5.8S rRNA, LSU-rRNA) and mRNA processing, more	0.0330189	0.902445	-0.0653856	0.777932	0.992182	1.71e-08	0.893777	4.38e-07
AN1486	AN1486	Ortholog(s) have role in endonucleolytic cleavage in ITS1 to separate SSU-rRNA from 5.8S rRNA and LSU-rRNA from tricistronic rRNA transcript (SSU-rRNA, 5.8S rRNA, LSU-rRNA), endonucleolytic cleavage involved in tRNA processing	0.0637921	0.756872	-0.0436874	0.814207	0.538379	0.000219213	0.4309	0.00341182
AN2262	AN2262	Ortholog(s) have role in ATP export, cellular response to oxidative stress, response to osmotic stress, ribosomal small subunit biogenesis, ribosomal small subunit export from nucleus	0.357706	0.0761098	-0.0221906	0.930275	0.920728	1.63e-07	0.540832	0.00305411
AN3096	rmtB	Putative transferase with a predicted role in histidine metabolism; arginine methyltransferase for histones H4, H3, and H2A	0.167456	0.577429	-5.41e-05	1	0.651427	0.00551692	0.483917	0.049175
AN5711	AN5711	Ortholog(s) have transferase activity, role in maturation of SSU-rRNA and cytoplasm localization	0.278134	0.127625	0.0928287	0.619322	0.773256	6.06e-07	0.587951	0.000150571
AN6149	AN6149	Ortholog(s) have RNA helicase activity, mitochondrial ribosomal large subunit rRNA binding activity and role in RNA metabolic process, mitochondrial large ribosomal subunit assembly, response to cold	0.0957315	0.624802	-0.222425	0.156588	0.632584	1.31e-05	0.314428	0.0434021
AN8824	AN8824	Ortholog(s) have ribosomal large subunit binding activity	-0.0467896	0.803566	0.0796025	0.629004	0.349356	0.0104709	0.475748	0.000435571
AN8860	AN8860	Ortholog(s) have ATP binding, ATPase activity, adenylate kinase activity	0.222915	0.241187	-0.0461483	0.822974	0.731854	2.92e-06	0.462791	0.00388324
AN2437	AN2437	Ortholog(s) have RNA binding, ribonuclease MRP activity, ribonuclease P activity	0.225374	0.332886	-0.0274719	0.91561	0.558024	0.00366674	0.305179	0.131917
AN9060	AN9060	Ortholog(s) have ATPase activator activity, role in endocytosis, rRNA processing, ribosomal large subunit biogenesis, ribosomal large subunit export from nucleus and cytoplasm, cytosol, nucleolus localization	-0.1263	0.407375	-0.115989	0.42259	-0.150877	0.269626	-0.140566	0.332133
number of genes in the group:		185
up-regulated genes in the group:			81		10		168		34
down-regulated genes in the group:			46		133		1		41
stress responsive/AtfA-dependent genes in the group:			127		143		169		75
number of the studied genes:		10748
up-regulated genes (total):			1875		2482		2840		2487
down-regulated genes (total):			1985		2514		2643		2386
stress responsive genes (total):			3860		4996		5483		4873
p-value for up-regulated genes (Fisher's exact test):			<2.20E-16		1		<2.20E-16		0.9522
p-value for down-regulated genes (Fisher's exact test):			0.01765		<2.20E-16		1		0.5341
p-value for stress responsive/AtfA-dependent genes (Fisher's exact test):			<2.20E-16		<2.20E-16		<2.20E-16		0.9192

## Sheet: Cell wall homeostasis
Supplementary Table S5 RNAseq data and the results of enrichment analyses of the studied gene groups
Sheet 2 - Cell wall homeostasis genes (cell wall biosynthesis and degradation, chitin synthesis and degradation, utilization of chitin monomers, cell wall integrity pathway)
Cell wall biosynthesis and degradation genes
GENE ID	Gene name	Feature (AspGD)	Description	log2FC	adj. p-value	log2FC	adj. p-value	log2FC	adj. p-value	log2FC	adj. p-value
				reference strain, Cd treated vs.	reference strain, untreated	DatfA mutant, Cd treated vs.	DatfA mutant, untreated	DatfA mutant, untreated vs.	reference strain, untreated	DatfA mutant, Cd treated vs.	reference strain, Cd treated
Biosynthesis
AN5885	agsA	Catalytic subunit of alpha-1,3 glucan synthase complex; plays a minor role in alpha-1,3 glucan synthesis compared to AgsB; locus contains the conserved upstream open reading frame (uORF) AN5885-uORF	1,3-a-glucan synthase	0.896712	0.00817689	-1.14043	0.000636485	0.141658	0.713621	-1.89548	3.03149e-09
AN3307	agsB	Catalytic subunit of the major alpha-1,3 glucan synthase complex; mutants grow as dispersed hyphae in liquid culture	1,3-a-glucan synthase	-0.561199	1.82192e-05	-0.178391	0.2117	-0.584832	3.66838e-06	-0.202023	0.158862
AN8444	celA	Protein with similarity to cellulose synthase; predicted role in beta-glucan synthesis	1,3-b-/1,4-b-glucan synthesis	1.64839	2.64154e-22	2.02478	1.19971e-41	2.01111	2.68278e-34	2.3875	3.33751e-57
AN10779	AN10779	Putative transglycosidase required for 1,6-beta-glucan biosynthesis	transglycosidase; 1,6-b-glucan biosynthesis	0.00862487	0.964953	0.370074	0.0099425	-0.82799	7.46536e-10	-0.466541	0.000594142
AN5740	rhoA	Protein with similarity to Saccharomyces cerevisiae Rho family GTPase Rho1p; involved in polar growth, hyphal branching, and cell wall synthesis	1,3-b-glucan synthase complex	-0.0510558	0.679872	-0.328598	0.00041709	0.387045	2.3301e-05	0.109503	0.308776
AN3729	fksA	Putative 1,3-beta-glucan synthase with a predicted role in glucan biosynthesis	1,3-b-glucan synthase complex	-0.618579	2.07672e-08	-0.631655	5.44096e-09	-1.18254	1.87975e-29	-1.19561	6.94473e-30
AN8846	gsaA	Putative 1,3-beta-glucan synthase with a predicted role in glucan biosynthesis; this locus is reported to contain an upstream open reading frame (uORF)	1,3-b-glucan synthase complex	-0.130081	0.171621	-0.204298	0.0170882	-0.105159	0.244055	-0.179376	0.0419336
AN4700	btgC	Protein with endo-beta-(1,3)-glucanase activity, involved in degradation of glucans	1,3-b-transglucosylases; connects the emerging 1,3-b-glucan chains to the existing b-glucan network	0.234641	0.271336	0.396953	0.0364426	0.13921	0.501654	0.301522	0.129813
AN10150	btgA	Putative 1,3-beta-transglucosylase with a predicted role in glucan processing	1,3-b-transglucosylases; connects the emerging 1,3-b-glucan chains to the existing b-glucan network	-0.18502	0.0313562	-0.670319	6.2669e-19	0.402497	1.60243e-07	-0.0828017	0.376196
AN3727	btgD	Putative 1,3-beta-transglucosylase with a predicted role in glucan processing	1,3-b-transglucosylases; connects the emerging 1,3-b-glucan chains to the existing b-glucan network	0.380565	0.592612	0.877281	0.097977	0.335334	0.598341	0.83205	0.125198
AN3730	gelC	Putative 1,3-beta-transglycosidase with a predicted role in glucan processing	1,3-b-transglucosylases; connects the emerging 1,3-b-glucan chains to the existing b-glucan network	-0.0976146	0.656463	-0.510524	0.00265535	-0.0422873	0.837975	-0.455197	0.00895717
AN7511	gelE	Putative 1,3-beta-transglycosidase with a predicted role in glucan processing; predicted glycosyl phosphatidylinositol (GPI)-anchor	1,3-b-transglucosylases; connects the emerging 1,3-b-glucan chains to the existing b-glucan network	-0.847521	9.90228e-12	-1.10182	3.86227e-20	0.763654	2.87661e-10	0.509351	5.40274e-05
AN0558	gelB	Putative 1,3-beta-transglycosidase with a predicted role in glucan processing; predicted glycosyl phosphatidylinositol (GPI)-anchor	1,3-b-transglucosylases; connects the emerging 1,3-b-glucan chains to the existing b-glucan network	-0.629739	3.9292e-07	-1.26142	3.91102e-27	0.563996	2.58695e-06	-0.0676823	0.670729
AN7657	gelA	Putative 1,3-beta-transglycosidase with a predicted role in glucan processing; predicted glycosyl phosphatidylinositol (GPI)-anchor; palA-dependent expression independent of pH	1,3-b-transglucosylases; connects the emerging 1,3-b-glucan chains to the existing b-glucan network	-0.360246	0.000444719	-0.239215	0.0207193	-0.941043	2.55268e-23	-0.820013	7.55548e-18
AN11152	gelD	Putative 1,3-beta-transglycosidase with a predicted role in glucan processing; predicted glycosylphosphatidylinositol (GPI)-anchored protein	1,3-b-transglucosylases; connects the emerging 1,3-b-glucan chains to the existing b-glucan network	0.441254	0.0636532	0.784321	0.000339273	-0.494851	0.0310366	-0.151785	0.564208
AN1551	btgE	Putative beta-glucosidase with predicted role in degradation of glucans; covalently bound cell wall protein	1,3-b-transglucosylases; connects the emerging 1,3-b-glucan chains to the existing b-glucan network	-0.57077	9.83354e-05	-1.09271	1.9146e-15	0.877295	2.19161e-10	0.355359	0.017762
AN7950	eglC	Putative glucan endo-1,3-beta-D-glucosidase with predicted role in degradation of glucans; glycosyl phosphatidylinositol (GPI)-linked protein	1,3-b-transglucosylases; connects the emerging 1,3-b-glucan chains to the existing b-glucan network	-0.141082	0.377424	0.303029	0.0280855	-1.05968	5.19875e-17	-0.615571	2.48907e-06
AN3053	crhD	Putative transglycosidase with a predicted role in glucan processing	transglycosidases; crosslinks b-glucan and chitin	-0.190342	0.0904767	-0.981231	1.4907e-24	0.539553	3.44938e-08	-0.251337	0.0175932
AN3914	crhA	Putative transglycosidase with a predicted role in glucan processing	transglycosidases; crosslinks b-glucan and chitin	-0.519902	0.00255599	-0.0728456	0.7289	-0.353786	0.0360698	0.0932704	0.657239
AN6948	crhE	Putative transglycosidase with a predicted role in glucan processing	transglycosidases; crosslinks b-glucan and chitin	-0.632367	0.632939	1.72433	0.176611	-1.90539	0.126145	0.451302	0.731335
AN4515	crhB	Putative transglycosidase with a predicted role in glucan processing; predicted glycosyl phosphatidylinositol (GPI)-anchor	transglycosidases; crosslinks b-glucan and chitin	-0.177006	0.281197	0.00734388	0.971854	-0.679467	6.09562e-07	-0.495117	0.000450966
AN0933	crhC	Putative transglycosidase with a predicted role in glucan processing; predicted glycosyl phosphatidylinositol (GPI)-anchor	transglycosidases; crosslinks b-glucan and chitin	0.0443079	0.82544	0.837024	1.8671e-09	-0.613508	1.3948e-05	0.179209	0.273231
Chitin synthesis
AN4566	chsC	Class I chitin synthase with a role in chitin biosynthesis; involved with ChsA in septum formation and conidiation; protein expressed at high levels in young cleistothecia and in mature ascospores	Chitin synthase	-0.753479	0.0750469	0.516547	0.221303	0.140698	0.75906	1.41072	0.00024708
AN7032	chsA	Class II chitin synthase with a role in chitin biosynthesis; involved with ChsC in septum formation and conidiation; transcript induced during asexual development; protein localizes to conidiophores	Chitin synthase	-0.668013	4.13273e-09	-0.430677	0.000211416	-0.591621	8.89224e-08	-0.354285	0.00311348
AN2523	chsB	Class III chitin synthase with a role in chitin biosynthesis; required for normal growth and conidiation; constitutively expressed during vegetative growth, sexual and asexual development	Chitin synthase	-0.0217948	0.909843	-0.294162	0.0335165	-0.0802031	0.600114	-0.35257	0.0102209
AN1555	chsD	Class IV chitin synthase involved in chitin biosynthesis	Chitin synthase	0.0788082	0.450003	0.299298	0.000424429	-0.434254	1.49125e-07	-0.213765	0.014766
AN6318	csmA	Class V chitin synthase with a role in chitin biosynthesis; involved in hyphal tip growth; contains a myosin-like domain; mutation is synthetically lethal with csmB mutation; localized at hyphal tips and septa	Chitin synthase	-0.147544	0.254392	0.229442	0.0501513	-0.530966	9.67968e-07	-0.15398	0.218199
AN6317	csmB	Class VI chitin synthase with a role in chitin biosynthesis; involved in hyphal tip growth; contains a myosin-like domain; mutation is synthetically lethal with csmA mutation; localized at hyphal tips and septa	Chitin synthase	-0.319053	0.0102152	-0.133459	0.314847	-0.584675	2.8696e-07	-0.399081	0.000773673
AN0799	AN0799	Has domain(s) with predicted chitin synthase activity and role in chitin biosynthetic process	Chitin synthase	-0.686398	0.465375	0.912723	0.502179	-3.2283	0.00195271	-1.62918	0.0939087
AN4367	chsF	Putative chitin synthase III with a predicted role in chitin biosynthesis; transcript is induced by nitrate	Chitin synthase	0.105549	0.561408	0.537013	0.000240403	-0.770361	6.76999e-08	-0.338897	0.0230222
AN1046	chsG	Putative class VII chitin synthase with a predicted role in chitin biosynthesis	Chitin synthase	-0.395787	0.410638	0.336157	0.533965	-1.33771	0.00192547	-0.605765	0.19263
AN8710	AN8710	Ortholog of A. fumigatus Af293 : Afu6g02510, A. niger CBS 513.88 : An12g07880, A. oryzae RIB40 : AO090120000136, Aspergillus wentii : Aspwe1_0103156 and Aspergillus sydowii : Aspsy1_0392745	Regulation of chitin synthase activity	0.217941	0.0356379	0.221008	0.0225913	0.0998104	0.347788	0.102878	0.344352
AN1069	AN1069	Ortholog(s) have unfolded protein binding activity	Regulation of chitin synthase activity	0.108265	0.351542	0.585327	1.64571e-10	0.042484	0.712177	0.519546	1.83178e-08
AN3445	AN3445	Protein with a predicted role in the regulation of chitin synthase activity	Regulation of chitin synthase activity	0.301496	0.00266383	-0.111106	0.309497	-0.350875	0.00024606	-0.763477	1.04244e-16
AN8765	AN8765	Protein with a predicted role in the regulation of chitin synthase activity	Regulation of chitin synthase activity	0.190528	0.156654	0.0370003	0.814797	-0.112556	0.399407	-0.266084	0.0309382
AN1554	AN1554	Protein with a predicted role in the regulation of chitin synthase activity	Regulation of chitin synthase activity	0.598678	1.38413e-06	0.901793	1.68747e-14	-0.0434432	0.771621	0.259672	0.0442138
AN3122	AN3122	Transcript levels increase during the unfolded-protein response (UPR); S. cerevisiae ortholog of Bch1p	Regulation of chitin synthase activity	0.100875	0.27507	-0.0428935	0.654953	0.213403	0.00707892	0.0696345	0.455408
Hydrolysis
AN7349	mutA	Protein with alpha-1,3-glucanase (mutanase) activity, involved in carbohydrate catabolism; highly expressed during sexual development, specifically expressed in Hulle cells	1,3-a-glucanase	0.160301	0.844767	0.616468	0.374896	-0.694152	0.306399	-0.237984	0.75114
AN3790	agnB	Putative alpha-1,3-glucanase	1,3-a-glucanase	-0.0857142	0.839641	-0.00184485	0.999119	-2.20447	2.65855e-10	-2.1206	7.97485e-10
AN11064	agnD	Putative alpha-1,3-glucanase	1,3-a-glucanase	0.763305	0.00385382	0.896849	0.000100762	0.415477	0.125109	0.549021	0.0214283
AN9042	agnC	Putative alpha-1,3-glucanase	1,3-a-glucanase	-0.331821	0.403555	0.292361	0.414634	-0.0856098	0.82772	0.538572	0.119289
AN1604	agnE	Putative alpha-1,3-glucanase; predicted glycosyl phosphatidylinositol (GPI)-anchor	1,3-a-glucanase	1.76474	0.0198531	-0.42271	0.636798	-0.130999	0.88403	-2.31845	0.00128608
AN3309	amyG	Putative alpha-amylase with a predicted role in starch metabolism	amylase	0.200194	0.227988	0.738244	6.13506e-08	-0.0581362	0.735258	0.479914	0.000628536
AN2018	amyA	Putative alpha-amylase with a predicted role in starch metabolism	Amylase-like family	-0.326025	0.218043	0.171996	0.52693	-0.40108	0.0958532	0.0969416	0.746774
AN3308	amyD	Putative alpha-amylase with a predicted role in starch metabolism; predicted glycosyl phosphatidylinositol (GPI)-anchor	Amylase-like family	-0.662381	1.35181e-09	-0.124216	0.328551	-1.35322	2.10173e-38	-0.815058	2.34672e-14
AN4507	amyC	Putative alpha-amylase with a predicted role in starch metabolism; predicted glycosyl phosphatidylinositol (GPI)-anchor	Amylase-like family	0.312541	0.731108	-0.233297	0.785652	0.273015	0.735258	-0.272823	0.752557
AN6324	amyE	Putative alpha-amylase with a predicted role in starch metabolism; predicted glycosylphosphatidylinositol (GPI)-anchored protein	Amylase-like family	0.0162098	0.962146	0.43473	0.0743385	-0.305092	0.23598	0.113428	0.695914
AN3388	amyF	Putative alpha-amylase with a predicted role in starch metabolism; transcriptionally induced by isomaltose in an amyR-dependent manner	Amylase-like family	0.979599	0.441168	3.0448	0.0120994	-1.28193	0.378168	0.78327	0.455825
AN3402	amyB	Putative alpha-amylase with a predicted role in starch metabolism; transcriptionally induced by isomaltose in an amyR-dependent manner	Amylase-like family	-1.23661	NA	-0.142038	0.948561	-0.290918	0.874609	0.803655	0.700624
AN0472	engA	Putative 1,3-beta-glucosidase with a role in carbon starvation-induced autolytic cell wall degradation	endo-1,3-b-glucanase	-0.084168	0.450762	0.219237	0.0198794	-0.44191	6.84278e-07	-0.138505	0.165661
AN3777	exgB	Protein with beta-(1,6)-glucanase activity, involved in degradation of glucans	exo-1,3-b-glucanase	-0.113704	0.915154	0.739159	0.353934	-0.261492	0.77144	0.591371	0.47987
AN7533	exgD	Protein with exo-beta-(1,3)-glucanase activity, involved in degradation of glucans	exo-1,3-b-glucanase	-0.113556	0.483849	0.313846	0.0135093	0.474349	0.000176219	0.901751	1.04305e-13
AN7869	AN7869	Putative exo-1,3-beta glucanase family protein	exo-1,3-b-glucanase	-1.38986	NA	-1.90468	0.297113	-0.222917	0.89333	-0.737736	0.751432
AN1332	exgA	Putative exo-1,3-beta-glucanase family protein	exo-1,3-b-glucanase	-0.334171	0.789335	-0.44023	0.639789	0.940533	0.298794	0.834474	0.409039
AN8947	exgE	Putative exo-1,3-beta-glucanase with a predicted role in glucan processing	exo-1,3-b-glucanase	-0.203691	NA	-1.06596	NA	-0.26633	NA	-1.1286	NA
AN0779	AN0779	Putative glucan 1,3-beta-glucosidase with a predicted role in glucan metabolism	exo-1,3-b-glucanase	-0.442746	8.67592e-05	-1.10295	1.81152e-22	-0.89859	3.79688e-17	-1.55879	3.72035e-45
AN8480	AN8480	Putative glucan 1,3-beta-glucosidase with a predicted role in glucan metabolism	exo-1,3-b-glucanase	0.53717	0.216531	2.02682	0.000726352	-2.86896	4.71681e-07	-1.37931	0.000539472
AN4852	AN4852	Putative glucan 1,3-beta-glucosidase with a predicted role in glucan metabolism	exo-1,3-b-glucanase	0.384722	0.00702441	0.626539	3.13208e-06	-0.450499	0.00124737	-0.208681	0.152772
AN4825	AN4825	Putative glucan 1,3-beta-glucosidase with a predicted role in glucan metabolism	exo-1,3-b-glucanase	-0.173238	0.590967	0.568025	0.0371919	-0.911226	0.000433929	-0.169963	0.58621
AN4052	exgC	Putative glucan 1,3-beta-glucosidase with a predicted role in glucan metabolism	exo-1,3-b-glucanase	0.14349	0.559273	-0.363039	0.0642312	0.595738	0.00170334	0.089209	0.71701
AN0550	AN0550	Putative glucan 1,3-beta-glucosidase with a predicted role in glucan metabolism	exo-1,3-b-glucanase	-1.48032	0.220132	0.744426	0.472342	-0.533475	0.616165	1.69127	0.127132
AN2385	xgeA	Protein with licheninase activity, involved in degradation of glucans: predicted glycosyl phosphatidylinositol (GPI)-anchor	Mixed-linked beta-glucanase	-0.445371	0.000892549	-0.286775	0.0340642	-0.0471563	0.761491	0.111439	0.477775
AN0452	AN0452	Protein with xyloglucan-specific endoglucanase activity, involved in degradation of xyloglucans; predicted role in cellulose metabolism	Mixed-linked beta-glucanase	-0.60404	0.000384313	-0.771076	2.21488e-06	-0.138591	0.444502	-0.305627	0.0986078
AN0245	AN0245	Putative glucanase with a predicted role beta-glucan hydrolysis	Mixed-linked beta-glucanase	-0.381875	0.00270016	-0.0496924	0.741187	0.022586	0.878887	0.354769	0.00388375
AN3883	AN3883	Putative glucanase with a predicted role beta-glucan hydrolysis	Mixed-linked beta-glucanase	3.51631	1.85621e-34	5.57236	6.29175e-35	-2.16953	2.50784e-05	-0.113482	0.670729
AN6697	sunA	Putative Sun-family protein	b-glucosidase	-0.405628	1.23735e-07	-0.602777	1.81233e-16	0.506438	5.75726e-12	0.309289	5.3408e-05
AN0726	sunB	Putative Sun-family protein; predicted glycosyl phosphatidylinositol (GPI)-anchor	b-glucosidase	-0.00530144	0.974351	-0.371634	0.00105755	0.631266	7.86502e-09	0.264934	0.0257276
AN4504	dfgG	Putative endo-mannanase GH76 family protein	Endo-mannanase	-0.209285	0.123706	0.25905	0.0492288	-0.994556	3.83027e-17	-0.526221	1.42143e-05
AN10345	dfgA	Putative endo-mannanase GH76 family protein	Endo-mannanase	0.0868841	NA	1.23744	0.510202	-2.443	0.125865	-1.29244	0.363818
AN6472	dfgF	Putative endo-mannanase GH76 family protein	Endo-mannanase	0.385298	0.60801	1.0389	0.06201	0.18182	0.798981	0.83542	0.144314
AN0393	dfgC	Putative endo-mannanase GH76 family protein; predicted type I transmembrane protein	Endo-mannanase	-0.608253	1.21966e-05	-0.679394	3.42574e-07	0.313896	0.0244223	0.242756	0.104608
AN3049	dfgD	Putative endo-mannanase GH76 family protein; predicted type I transmembrane protein	Endo-mannanase	-0.301214	0.0687042	-0.160197	0.351285	-0.278104	0.0763058	-0.137087	0.449609
AN8421	dfgB	Putative endo-mannanase GH76 family protein; role in polysaccharide degradation	Endo-mannanase	0.89047	1.19743e-09	1.9361	8.4695e-29	-2.00965	2.02676e-30	-0.964019	5.73229e-12
AN0383	dfgE	Putative endo-mannanase GH76 family protein; transcript repressed by nitrate	Endo-mannanase	-0.311919	0.586635	-0.946892	0.0540155	-0.133699	0.802605	-0.768672	0.139459
Chitin hydrolysis
AN4871	chiB	Class V chitinase; glycoside hydrolase family 18 (GH18) protein with a role in the age-dependent autolysis	Chitinases	0.430551	0.00180568	0.499255	7.92569e-05	0.518982	6.64054e-05	0.587686	3.27389e-06
AN8241	chiA	Endochitinase with a predicted role in chitin hydrolysis; glycosylphosphatidylinositol (GPI) anchored protein; modi&#64257;ed by O-linked glycosylation; localized to germination sites, hyphal branch points and regions of polarized growth	Chitinases	0.169212	0.163698	0.51818	3.10103e-05	-3.97882	1.799e-285	-3.62985	1.6365e-257
AN10838	AN10838	Has domain(s) with predicted catalytic activity, chitin binding, chitinase activity, hydrolase activity, hydrolyzing O-glycosyl compounds activity	Chitinases	0.5815	2.30056e-05	0.506518	0.00015613	0.0839203	0.593301	0.0089374	0.963779
AN11233	AN11233	Has domain(s) with predicted catalytic activity, chitin binding, chitinase activity, hydrolase activity, hydrolyzing O-glycosyl compounds activity and role in carbohydrate metabolic process, chitin catabolic process	Chitinases	1.02379	0.352252	-0.589445	0.58513	0.910404	0.374495	-0.702836	0.51869
AN10502	AN10502	Has domain(s) with predicted catalytic activity, hydrolase activity, hydrolyzing O-glycosyl compounds activity and role in carbohydrate metabolic process	Chitinases	NA	NA	NA	NA	NA	NA	NA	NA
AN8481	AN8481	Putative chitinase; glycoside hydrolase family 18 (GH18) protein with a predicted role in chitin	Chitinases	-0.158781	0.48477	-0.210421	0.330453	-0.543783	0.00364919	-0.595424	0.0017537
AN0221	AN0221	Putative chitinase; glycoside hydrolase family 18 (GH18) protein with a predicted role in chitin hydrolysis	Chitinases	1.02656	6.7987e-05	0.607599	0.0284244	-0.409384	0.167892	-0.828347	0.000645827
AN0517	AN0517	Putative chitinase; glycoside hydrolase family 18 (GH18) protein with a predicted role in chitin hydrolysis	Chitinases	-0.228083	0.741006	-0.458548	0.521166	-0.965031	0.0910953	-1.1955	0.0479911
AN0299	AN0299	Putative chitinase; glycoside hydrolase family 18 (GH18) protein with a predicted role in chitin hydrolysis	Chitinases	0.0751054	0.611828	-0.234806	0.0502937	0.0554647	0.680104	-0.254447	0.0344235
AN11059	AN11059	Putative chitinase; glycoside hydrolase family 18 (GH18) protein with a predicted role in chitin hydrolysis	Chitinases	-1.16989	0.0944138	1.23524	0.0212145	-0.287302	0.663614	2.11783	0.000351111
AN0549	AN0549	Putative chitinase; glycoside hydrolase family 18 (GH18) protein with a predicted role in chitin hydrolysis	Chitinases	-0.176251	0.831725	1.30921	0.0888244	-1.9312	0.00710719	-0.445741	0.549286
AN0509	AN0509	Putative chitinase; glycoside hydrolase family 18 (GH18) protein with a predicted role in chitin hydrolysis	Chitinases	-0.324927	NA	-0.96206	NA	-0.489096	NA	-1.12623	0.747167
AN7613	AN7613	Putative chitinase; glycoside hydrolase family 18 (GH18) protein with a predicted role in chitin hydrolysis	Chitinases	-0.0275494	0.984045	1.39577	0.253231	-1.59672	0.177153	-0.173407	0.896457
AN0541	AN0541	Putative chitinase; glycoside hydrolase family 18 (GH18) protein with a predicted role in chitin hydrolysis	Chitinases	-2.16249	NA	-1.06597	NA	-2.22513	NA	-1.12861	0.748824
AN11063	AN11063	Putative Class III chitinase	Chitinases	0.500141	0.00531233	-0.105248	0.542734	1.3412	6.14703e-18	0.735806	9.1914e-07
AN7886	AN7886	Putative class V chitinase; glycoside hydrolase family 18 (GH18) protein with a predicted role in chitin hydrolysis	Chitinases	0.246974	NA	0.918781	0.659901	-1.62543	0.374489	-0.953621	0.582918
AN5454	AN5454	Putative class V chitinase; glycoside hydrolase family 18 (GH18) protein with a predicted role in chitin hydrolysis	Chitinases	3.26467	NA	3.55972	NA	0	NA	0.0286918	0.991527
AN9390	chiC	Putative endochitinase; glycoside hydrolase family 18 (GH18) protein with a predicted role in chitin hydrolysis	Chitinases	-0.0641747	0.81754	0.345361	0.118386	-0.61335	0.00307272	-0.203814	0.380483
AN1502	nagA	Extracellular N-acetyl-beta-glucosaminidase with a predicted role in chitin hydrolysis	N-Acetyl-b-D-glucosaminidase	0.0417035	0.831379	-0.359331	0.0187187	-0.554054	8.85268e-05	-0.955089	6.41441e-12
AN4696	AN4696	Ortholog of A. fumigatus Af293 : Afu5g08820, A. niger CBS 513.88 : An07g04590, A. oryzae RIB40 : AO090020000448, Aspergillus wentii : Aspwe1_0023715 and Aspergillus sydowii : Aspsy1_0033180	Chitosanase	-0.5134	0.000203695	-0.221187	0.173431	-1.7961	8.44022e-42	-1.50389	8.76185e-29
AN11051	AN11051	Putative GH 75 family chitosanase	Chitosanase	0.855524	0.00607978	1.47347	6.31817e-07	-0.579122	0.0854941	0.0388217	0.923306
AN1852	AN1852	Putative chitin deacetylase	Chitin deacetylases	-1.56474	7.72275e-11	-0.044381	0.948021	-4.12488	1.89125e-33	-2.60452	2.97411e-13
AN4823	AN4823	Putative chitin deacetylase	Chitin deacetylases	0.572846	0.592322	0.57548	0.580625	-0.415169	0.695077	-0.412535	0.685014
AN9380	AN9380	Putative chitin deacetylase; catalyzes the conversion of chitin to chitosan by the deacetylation of N-acetyl-D-glucosamine residues	Chitin deacetylases	-0.109823	0.735787	-0.952972	0.00013319	-0.629921	0.0109534	-1.47307	1.09156e-09
AN10309	AN10309	Putative chitin deacetylase; predicted glycosyl phosphatidylinositol (GPI)-anchor	Chitin deacetylases	0.559487	0.000109418	0.682568	7.34573e-07	-0.162042	0.307146	-0.0389615	0.836482
All genes
number of genes in the group:			99
up-regulated genes in the group:				16		29		15		15
down-regulated genes in the group:				19		21		35		32
stress responsive/AtfA-dependent genes in the group:				35		50		50		47
number of the studied genes:			10748
up-regulated genes (total):				1875		2482		2840		2487
down-regulated genes (total):				1985		2514		2643		2386
stress responsive genes (total):				3860		4996		5483		4873
p-value for up-regulated genes (Fisher's exact test):				0.673		0.091		0.9976		0.9819
p-value for down-regulated genes (Fisher's exact test):				0.467		0.733		0.01051		0.01269
p-value for stress responsive/AtfA-dependent genes (Fisher's exact test):				0.584		0.24		0.5805		0.3707
Cell wall biosynthesis
number of genes in the group:			37
up-regulated genes in the group:				5		11		8		6
down-regulated genes in the group:				10		13		17		16
stress responsive/AtfA-dependent genes in the group:				15		24		25		22
number of the studied genes:			10748
up-regulated genes (total):				1875		2482		2840		2487
down-regulated genes (total):				1985		2514		2643		2386
stress responsive genes (total):				3860		4996		5483		4873
p-value for up-regulated genes (Fisher's exact test):				0.798		0.218		0.8		0.888
p-value for down-regulated genes (Fisher's exact test):				0.131		0.072		0.003719		0.003413
p-value for stress responsive/AtfA-dependent genes (Fisher's exact test):				0.334		0.017		0.03101		0.05931
Cell wall hydrolysis
number of genes in the group:			62
up-regulated genes in the group:				11		18		7		9
down-regulated genes in the group:				9		8		18		16
stress responsive/AtfA-dependent genes in the group:				20		26		25		25
number of the studied genes:			10748
up-regulated genes (total):				1875		2482		2840		2487
down-regulated genes (total):				1985		2514		2643		2386
stress responsive genes (total):				3860		4996		5483		4873
p-value for up-regulated genes (Fisher's exact test):				0.528		0.167		0.999		0.9671
p-value for down-regulated genes (Fisher's exact test):				0.833		0.987		0.2482		0.2905
p-value for stress responsive/AtfA-dependent genes (Fisher's exact test):				0.767		0.801		0.9656		0.822
Chitin synthesis
number of genes in the group:			15
up-regulated genes in the group:				3		5		1		6
down-regulated genes in the group:				2		2		8		7
stress responsive/AtfA-dependent genes in the group:				5		7		9		13
number of the studied genes:			10748
up-regulated genes (total):				1875		2482		2840		2487
down-regulated genes (total):				1985		2514		2643		2386
stress responsive genes (total):				3860		4996		5483		4873
p-value for up-regulated genes (Fisher's exact test):				0.501		0.252		0.99		0.1104
p-value for down-regulated genes (Fisher's exact test):				0.795		0.898		0.01558		0.03114
p-value for stress responsive/AtfA-dependent genes (Fisher's exact test):				0.675		0.594		0.3319		0.001199
Chitin hydrolysis
number of genes in the group:			25
up-regulated genes in the group:				6		7		2		3
down-regulated genes in the group:				2		2		8		9
stress responsive/AtfA-dependent genes in the group:				8		9		10		12
number of the studied genes:			10748
up-regulated genes (total):				1875		2482		2840		2487
down-regulated genes (total):				1985		2514		2643		2386
stress responsive genes (total):				3860		4996		5483		4873
p-value for up-regulated genes (Fisher's exact test):				0.262		0.351		0.9954		0.9506
p-value for down-regulated genes (Fisher's exact test):				0.959		0.989		0.2572		0.08244
p-value for stress responsive/AtfA-dependent genes (Fisher's exact test):				0.727		0.896		0.9041		0.4711
Cell wall integrity pathway genes
GENE ID	Gene name	Feature (AspGD)	Description	log2FC	adj. p-value	log2FC	adj. p-value	log2FC	adj. p-value	log2FC	adj. p-value
				reference strain, Cd treated vs.	reference strain, untreated	DatfA mutant, Cd treated vs.	DatfA mutant, untreated	DatfA mutant, untreated vs.	reference strain, untreated	DatfA mutant, Cd treated vs.	reference strain, Cd treated
AN6927	wscB	Putative plasma membrane sensor-transducer; N- and O- glycosylated and localized in the cell wall and membrane	Putative PM sensor-transducer	0.629748	9.02903e-07	0.866198	3.97335e-13	-0.0319716	0.84559	0.204479	0.119415
AN5660	wscA	Putative plasma membrane sensor-transducer; N- and O- glycosylated and localized in the cell wall and membrane; mutants display a high frequency of swollen hyphae under hypo-osmotic conditions; required for conidiation	Putative PM sensor-transducer	0.119042	0.205402	-0.203829	0.0157437	-0.4742	1.85241e-09	-0.79707	8.09241e-25
AN5666	mpkA	Putative mitogen-activated protein kinase (MAP kinase) involved in conidial germination and polarized growth; mutants arrest as branched germlings, phenotype is remediated by sucrose and NaCl; reduced growth on AVICEL medium	MAPK	8.94366e-05	0.999812	0.00605938	0.971814	-0.623315	8.7899e-09	-0.617345	1.38036e-08
AN4189	mkkA	Essential mitogen-activated protein kinase kinase (MAPKK); mutants arrest as branched germlings, but the phenotype is remediated by NaCl or sucrose	MAPKK	-0.242142	0.193797	-0.159373	0.394728	-0.325341	0.0529464	-0.242572	0.179652
AN4887	bckA	Putative mitogen-activated protein kinase kinase kinase (MAPKKK); inviable mutant arrests as branched germlings, remediated by NaCl or sucrose	MAPKKK	0.305775	0.0273702	0.397464	0.00242698	-0.547955	1.70885e-05	-0.456267	0.00040728
AN0106	pkcA	Protein kinase C; essential gene; required for wild-type level of growth, cell wall integrity and penicillin biosynthesis	Protein kinase C	-0.486417	3.23658e-11	-0.310857	2.5884e-05	-0.461559	1.09622e-10	-0.285998	0.000137127
AN8676	mcmA	Putative MADS-box family transcription factor; ORF that was absent from the original release of version 4 of the A. nidulans annotation, but present in a previous version; reinstated into version 4 in AspGD as of July 2009	MADS-box transcription factor	-0.263955	0.0102608	-0.661087	9.83167e-13	0.234375	0.0167247	-0.162756	0.125935
AN2984	rlmA	Putative MADS-box family transcription factor; regulates cell wall hydrolase gene expression and autolysis; mutants have abnormal conidiophores arrested at metula formation	cell wall stress response	-0.0456934	0.865723	0.220799	0.306261	-0.399461	0.0434251	-0.132968	0.575812
number of genes in the group:			8
up-regulated genes in the group:				2		2		1		0
down-regulated genes in the group:				2		3		5		4
stress responsive/AtfA-dependent genes in the group:				4		5		6		4
number of the studied genes:			10748
up-regulated genes (total):				1875		2482		2840		2487
down-regulated genes (total):				1985		2514		2643		2386
stress responsive genes (total):				3860		4996		5483		4873
p-value for up-regulated genes (Fisher's exact test):				0.4196		0.5837		0.9142		1
p-value for down-regulated genes (Fisher's exact test):				0.451		0.2818		0.02541		0.07863
p-value for stress responsive/AtfA-dependent genes (Fisher's exact test):				0.3133		0.2893		0.1582		0.531

## Sheet: Cd detoxification
Supplementary Table S5 RNAseq data and the results of enrichment analyses of the studied gene groups
Sheet 3 - Cd2+ detoxification genes (putative Cd2+ efflux pump genes, P-type ATPase genes, Cys rich protein genes, glyoxylate pathway genes)
Putative Cd2+ efflux pump genes
GENE ID	Gene name	Feature (AspGD)	Description	log2FC	adj. p-value	log2FC	adj. p-value	log2FC	adj. p-value	log2FC	adj. p-value
				control, Cd treated vs.	control, untreated	DatfA, Cd treated vs.	DatfA, untreated	DatfA, untreated vs.	control, untreated	DatfA, Cd treated vs.	control, Cd treated
AN3117	crpA	Ortholog(s) have copper transmembrane transporter activity, phosphorylative mechanism activity, role in cadmium ion transport, cellular copper ion homeostasis, copper ion transport, silver ion transport and plasma membrane localization	Cu2+/Cd2+ pump	0.589314	1.90401e-05	0.300238	0.0367206	-1.18034	1.43955e-19	-1.46941	4.4764e-30
AN3624	ygA	Protein required for conidia pigmentation, predicted to act as a copper transporter; mutants produce yellow conidia at high pH and green conidia at low pH	Cu2+ pump	-0.207721	0.17812	-0.200209	0.188039	-0.644082	1.28607e-06	-0.63657	2.44614e-06
AN10468	AN10468	Ortholog(s) have role in cadmium ion transport, zinc ion transport	zinc transport	-1.32055	2.77828e-18	-0.725098	1.38513e-06	-0.424737	0.00410635	0.170717	0.368903
AN5633	AN5633	Ortholog(s) have inorganic cation transmembrane transporter activity, solute:proton symporter activity		0.0310346	0.917794	0.608556	0.00181706	0.124083	0.603997	0.701604	0.000369811
AN1795	AN1795	Ortholog(s) have cobalt ion transmembrane transporter activity, zinc ion transmembrane transporter activity	cobalt transport	-0.321068	0.0172958	-0.36257	0.00407974	0.531296	1.43673e-05	0.489794	9.36272e-05
number of genes in the group:			5
up-regulated genes in the group:				1		2		1		2
down-regulated genes in the group:				2		2		3		2
stress responsive/AtfA-dependent genes in the group:				3		4		4		4
number of the studied genes:			10748
up-regulated genes (total):				1875		2482		2840		2487
down-regulated genes (total):				1985		2514		2643		2386
stress responsive genes (total):				3860		4996		5483		4873
p-value for up-regulated genes (Fischer's exact test):				0.6166		0.327		0.7844		0.328
p-value for down-regulated genes (Fischer's exact test):				0.2317		0.3333		0.0992		0.3083
p-value for stress responsive/AtfA-dependent genes (Fischer's exact test):				0.2495		0.1466		0.2004		0.1346
Putative P-type ATPase genes
GENE ID	Gene name	Feature (AspGD)	Description	log2FC	adj. p-value	log2FC	adj. p-value	log2FC	adj. p-value	log2FC	adj. p-value
				reference strain, Cd treated vs.	reference strain, untreated	DatfA mutant, Cd treated vs.	DatfA mutant, untreated	DatfA mutant, untreated vs.	reference strain, untreated	DatfA mutant, Cd treated vs.	reference strain, Cd treated
AN0318	AN0318	Putative plasma membrane ATPase with a predicted role in energy metabolism	H+ pupmp	0.461399	0.0189868	0.227939	0.248856	0.175287	0.399665	-0.0581724	0.806985
AN10357	AN10357	Ortholog of A. fumigatus Af293 : Afu3g13810, A. niger CBS 513.88 : An02g09500, A. oryzae RIB40 : AO090012000774, Neosartorya fischeri NRRL 181 : NFIA_063450 and Aspergillus wentii : Aspwe1_0170040		-0.523959	0.00069798	-0.369175	0.0111639	0.372348	0.0106779	0.527131	0.00039299
AN10367	AN10367	Putative P-type ATPase	Ca2+ pump	0.45213	0.000875901	0.428824	0.00107594	0.250153	0.0680063	0.226847	0.109859
AN10982	enaC	Putative P-type ATPase sodium pump	Na+ pupmp	0.130544	0.389326	1.04165	1.22e-14	-1.76154	1.99e-41	-0.85044	4.2e-12
AN1189	pmcA	Putative calcium-transporting vacuolar ATPase involved in calcium homeostasis; transcript induced in response to calcium dichloride in a CrzA-dependent manner	Ca2+ pump	-0.730208	8.67e-05	-1.24779	1.53e-12	-0.140123	0.497383	-0.657704	0.000388215
AN1628	enaB	Putative membrane ATPase with a predicted role in energy metabolism	Na+ pupmp	-1.45451	1.25e-28	-1.09458	4.56e-17	-0.303727	0.029001	0.056198	0.757535
AN2011	dnfC	Putative flippase, type 4 P-type ATPase involved in distribution lipids	flipase	-0.379585	0.104506	0.293856	0.206639	-0.926171	6.99e-06	-0.25273	0.295574
AN2827	AN2827	Putative potassium-transporting ATPase with a predicted role in energy metabolism	K+ pump	-0.362844	0.180985	0.307968	0.326308	-2.01186	7.28e-16	-1.34105	6.26e-08
AN3117	crpA	Ortholog(s) have copper transmembrane transporter activity, phosphorylative mechanism activity, role in cadmium ion transport, cellular copper ion homeostasis, copper ion transport, silver ion transport and plasma membrane localization	Cu2+/Cd2+ pump	0.589314	1.9e-05	0.300238	0.0367206	-1.18034	1.44e-19	-1.46941	4.48e-30
AN3624	ygA	Protein required for conidia pigmentation, predicted to act as a copper transporter; mutants produce yellow conidia at high pH and green conidia at low pH	Cu2+ pump	-0.207721	0.17812	-0.200209	0.188039	-0.644082	1.29e-06	-0.63657	2.45e-06
AN4859	pmaA	Plasma membrane ATPase with a predicted role in energy metabolism	H+ pupmp	-0.881679	5.57e-08	-1.2402	1.95e-15	-0.222463	0.20453	-0.580981	0.00040365
AN4920	pmcB	Putative calcium-transporting mitochondrial ATPase involved in calcium homeostasis	Ca2+ pump	-0.330393	0.594541	-0.218996	0.721773	0.0426159	0.943778	0.154012	0.814164
AN5088	AN5088	Putative potassium-transporting ATPase with a predicted role in energy metabolism	K+ pump	0.354673	0.322358	0.621689	0.173723	-2.17492	6.32e-09	-1.9079	8.09e-09
AN5743	AN5743	Putative potassium-transporting ATPase with a predicted role in energy metabolism	K+ pump	-0.00485333	0.977968	0.70395	3.41e-09	-0.404833	0.000956225	0.303971	0.0173893
AN6112	dnfB	Flippase, type 4 P-type ATPase involved in distribution of phosphatidylserine	flipase	-0.144358	0.289656	-0.276391	0.021768	-0.256121	0.0315164	-0.388154	0.000976553
AN6614	dnfD	Putative flippase, type 4 P-type ATPase involved in distribution lipids	flipase	-0.110667	0.347593	0.252706	0.0120573	-0.313093	0.00153736	0.0502799	0.690105
AN6642	enaA	Putative potassium-transporting ATPase with a predicted role in energy metabolism; locus contains the conserved upstream open reading frames (uORFs) AN6642-uORF and AN6642-uORF.2	Na+/K+ pump	-0.813506	0.000293444	1.04324	1.96e-06	-2.61805	7.05e-36	-0.761305	0.000624573
AN7464	pmrA	Putative calcium-transporting ATPase with a predicted role in energy metabolism; putative secretory pathway component; up-regulated under osmotic stress conditions	Ca2+ pump	0.00360292	0.988706	0.00937874	0.969553	0.407065	0.0152423	0.412841	0.0156958
AN8219	AN8219	Putative plasma membrane ATPase with a predicted role in energy metabolism	H+ pupmp	0.484714	0.162232	0.408084	0.270696	-0.737154	0.0305297	-0.813784	0.00947967
AN8399	AN8399	Putative potassium-transporting ATPase with a predicted role in energy metabolism; transcript induced in response to calcium dichloride in a CrzA-dependent manner	K+ pump	-0.280662	0.0301685	0.853898	1.55e-10	-2.70502	1.04e-105	-1.57046	2.09e-40
AN8941	AN8941	Putative potassium-transporting ATPase (alpha 1 isoform) with a predicted role in energy metabolism	K+ pump	-0.674725	0.0111266	-0.795454	0.047054	-2.54614	5.83e-19	-2.66686	4.17e-16
number of genes in the group:			21
up-regulated genes in the group:				3		7		2		3
down-regulated genes in the group:				7		6		14		12
stress responsive/AtfA-dependent genes in the group:				10		13		16		15
number of the studied genes:			10748
up-regulated genes (total):				1875		2482		2840		2487
down-regulated genes (total):				1985		2514		2643		2386
stress responsive genes (total):				3860		4996		5483		4873
p-value for up-regulated genes (Fisher's exact test):				0.7358		0.1924		0.9865		0.8954
p-value for down-regulated genes (Fisher's exact test):				0.07659		0.3653		5.489e-05		0.0005357
p-value for stress responsive/AtfA-dependent genes (Fisher's exact test):				0.1852		0.1153		0.0167		0.0142
Cys rich protein genes
GENE ID	Gene name	Feature (AspGD)	Cys content (absolute and in percentage of the total number of amino-acids in the protein)	log2FC	adj. p-value	log2FC	adj. p-value	log2FC	adj. p-value	log2FC	adj. p-value
				reference strain, Cd treated vs.	reference strain, untreated	DatfA mutant, Cd treated vs.	DatfA mutant, untreated	DatfA mutant, untreated vs.	reference strain, untreated	DatfA mutant, Cd treated vs.	reference strain, Cd treated
AN8544	AN8545	Ortholog of Aspergillus versicolor : Aspve1_0033877 and Aspergillus sydowii : Aspsy1_0466900	36 (12 %)	-0.0548371	0.766327	0.444976	0.00227217	-2.08807	3.65e-56	-1.58825	6.19e-34
AN5948	AN5948	Predicted glycosylphosphatidylinositol (GPI)-anchored protein	20 (11 %)	0.00856504	0.971615	-0.200096	0.280443	-0.0722945	0.714542	-0.280955	0.119134
AN5111	AN5111	Has domain(s) with predicted nucleic acid binding, zinc ion binding activity	21 (12 %)	0.0787373	0.564928	-0.843137	1.88e-17	1.04847	7.7e-26	0.126597	0.298541
AN0759	AN0759	Ortholog of A. nidulans FGSC A4 : AN10907, A. fumigatus Af293 : Afu1g14190, Afu5g00975, A. niger CBS 513.88 : An01g12200 and A. oryzae RIB40 : AO090005000951	15 (11 %)	-0.664496	0.0412289	-2.52687	7.95e-43	4.3206	1.17e-83	2.45822	2.46e-22
AN11378	AN11378	Ortholog of A. oryzae RIB40 : AO090001000134, Aspergillus glaucus : Aspgl1_0071332, Aspergillus wentii : Aspwe1_0171393 and Aspergillus versicolor : Aspve1_0087914	16 (13 %)	-0.371604	0.098539	0.0460304	0.875939	-1.03866	2.67e-07	-0.621024	0.00344491
AN7011	crdA	Ortholog of A. fumigatus Af293 : Afu4g04318, A. niger CBS 513.88 : An14g00530, Aspergillus wentii : Aspwe1_0053203, Aspergillus sydowii : Aspsy1_0184132 and Aspergillus terreus NIH2624 : ATET_02726	16 (15 %)	-4.13084	4.89e-46	-4.09405	5.59e-46	-0.445993	0.16129	-0.409201	0.243958
AN7290	AN7290	Ortholog(s) have role in mRNA cis splicing, via spliceosome, mRNA splicing, via spliceosome, response to xenobiotic stimulus, spliceosomal complex assembly and U2 snRNP, nucleus localization	12 (11 %)	0.468738	0.000827753	1.34609	3e-27	-0.212349	0.155681	0.665002	7.21e-08
AN11757	AN11757	Ortholog of A. nidulans FGSC A4 : AN11609, A. oryzae RIB40 : AO090012000297, Aspergillus versicolor : Aspve1_0088687, Aspergillus zonatus : Aspzo1_0133237 and Aspergillus sydowii : Aspsy1_0049837	13 (13 %)	0.485842	7.47e-05	0.221903	0.0844924	-0.15951	0.22492	-0.423448	0.000436051
AN10473	AN10473	Protein of unknown function	12 (13 %)	-2.15556	NA	0	NA	-2.2182	NA	0	NA
AN11609	AN11609	Ortholog of A. nidulans FGSC A4 : AN11757, A. oryzae RIB40 : AO090012000297, Aspergillus versicolor : Aspve1_0088687, Aspergillus zonatus : Aspzo1_0133237 and Aspergillus sydowii : Aspsy1_0049837	14 (17 %)	0.203396	0.295606	-0.31546	0.0706447	0.81855	3.14e-07	0.299693	0.0925824
AN0791	AN0791	Protein of unknown function	12 (17 %)	-0.784294	3.31e-06	-0.422454	0.0146811	-0.969316	2.04e-09	-0.607476	0.000326996
AN11899	pmcA	Ortholog of Aspergillus glaucus : Aspgl1_0830437 and Aspergillus clavatus NRRL 1 : ACLA_007370	8 (15 %)	-0.474177	0.00234925	-0.592958	3.86e-06	4.24979	3.83e-237	4.13101	7.29e-218
AN11083	AN11083	Ortholog of A. fumigatus Af293 : Afu3g00660, A. niger CBS 513.88 : An03g00720, Aspergillus wentii : Aspwe1_0055457 and Aspergillus sydowii : Aspsy1_0049802	6 (11 %)	-0.321581	0.10575	0.718281	2.86e-05	0.107538	0.597594	1.1474	1.17e-11
AN11938	AN11938	Protein of unknown function	9 (18 %)	0.00791509	0.973396	0.0523974	0.819684	-1.22739	1.53e-14	-1.1829	9.24e-14
AN12111	AN12111	Ortholog of Aspergillus clavatus NRRL 1 : ACLA_020580 and Aspergillus carbonarius ITEM 5010 : Acar5010_207904	6 (12 %)	-0.831343	0.0491566	1.56537	0.0155803	-3.81384	1.25e-11	-1.41713	0.00190037
AN5696	ntpA	Nitric oxide-induced nitrosothionein involved in NO detoxification	7 (21 %)	-0.481021	0.000204173	-0.316468	0.014432	0.282995	0.0284389	0.447549	0.000440222
AN11489	AN11489	Protein of unknown function; transcript is induced by nitrate	8 (35 %)	-0.378579	0.0270609	0.161738	0.375086	-0.660897	2.24e-05	-0.120579	0.537109
AN11288	AN11288	Protein of unknown function	4 (21 %)	-1.1754	2.71e-05	-1.31366	6.76e-07	0.0722363	0.816569	-0.0660279	0.870684
number of genes in the group:			18
up-regulated genes in the group:				2		4		4		5
down-regulated genes in the group:				8		7		6		6
stress responsive/AtfA-dependent genes in the group:				10		11		10		11
number of the studied genes:			10748
up-regulated genes (total):				1875		2482		2840		2487
down-regulated genes (total):				1985		2514		2643		2386
stress responsive genes (total):				3860		4996		5483		4873
p-value for up-regulated genes (Fisher's exact test):				0.8478		0.6255		0.7407		0.4068
p-value for down-regulated genes (Fisher's exact test):				0.01003		0.1046		0.2684		0.1923
p-value for stress responsive/AtfA-dependent genes (Fisher's exact test):				0.0702		0.1566		0.4414		0.134
Glyoxylate pathway genes
GENE ID	Gene name	Feature (AspGD)	Cys content (%)	log2FC	adj. p-value	log2FC	adj. p-value	log2FC	adj. p-value	log2FC	adj. p-value
				reference strain, Cd treated vs.	reference strain, untreated	DatfA mutant, Cd treated vs.	DatfA mutant, untreated	DatfA mutant, untreated vs.	reference strain, untreated	DatfA mutant, Cd treated vs.	reference strain, Cd treated
AN6650	mcsA	Methylcitrate synthase with a predicted role in the methylcitrate pathway or the TCA cycle; transcript upregulated by exposure to ethanol	NA	-1.46506	1.11932e-17	-1.63652	2.25469e-19	-1.07015	1.40012e-10	-1.24161	2.96133e-11
AN8275	citA	Mitochondrial citrate synthase with a predicted role in the TCA cycle	NA	-0.515985	9.01214e-06	-0.910555	1.29687e-16	0.193107	0.111347	-0.201463	0.108305
AN5300	AN5300	Putative aconitate hydratase with a predicted role in the TCA cycle	NA	0.188992	0.654749	0.778713	0.021768	-0.565637	0.115446	0.0240837	0.958539
AN5525	acoA	Putative aconitate hydratase with a predicted role in the TCA cycle; intracellular; protein abundance decreased by menadione stress; protein expressed at increased levels in a hapX mutant versus wild-type	NA	-2.35246	3.76583e-37	-2.93742	2.2911e-58	-0.385922	0.0534905	-0.970885	3.51117e-07
AN5634	acuD	Isocitrate lyase, required for utilization of acetate and fatty acids as carbon sources; transcriptional induction in response to acetate is mediated by FacB; transcriptional induction in response to long-chain fatty acids mediated by FarA	NA	-0.535112	0.0231422	1.28346	5.46232e-09	-2.0875	1.83303e-22	-0.268924	0.287088
AN8775	AN8775	Ortholog of Neosartorya fischeri NRRL 181 : NFIA_004310	NA	1.20504	NA	-2.3311	0.211798	-0.748832	0.606782	-4.28497	0.00886501
AN6653	acuE	Malate synthase, required for utilization of acetate as carbon source; transcription induction by acetate mediated by FacB; carbon catabolite repression mediated by CreA; transcription induction by long-chain fatty acids mediated by FarA	NA	-1.42291	0.00105041	-1.19385	0.00538339	-1.61746	9.26627e-05	-1.3884	0.00115358
AN6717	mdhA	Putative mitochondrial malate dehydrogenase with a predicted role in the TCA cycle; intracellular; protein abundance decreased by menadione stress	NA	-0.35986	0.00155668	-0.475692	9.94846e-06	0.424742	8.04229e-05	0.30891	0.00610074
AN6499	mdhC	Putative malate dehydrogenase with a predicted role in the methylglyoxal bypass or the TCA cycle; intracellular; protein abundance decreased by menadione stress	NA	-0.815856	4.16978e-18	-0.817439	1.11669e-18	-0.477966	3.78185e-07	-0.479549	4.96835e-07
AN5031	mdhB	Putative malate dehydrogenase with a predicted role in the methylglyoxal bypass or the TCA cycle	NA	0.882285	NA	0	NA	-2.57502	NA	-3.56148	0.208755
AN3563	AN3563	Putative oxalate decarboxylase with a predicted role in oxalic acid metabolism	NA	0.667413	0.559785	1.83743	0.0438269	-0.362946	0.756915	0.807069	0.379168
AN6525	aciA	Putative formate dehydrogenase with a predicted role in oxalic acid metabolism; intracellular; protein abundance decreased by menadione stress; inducible by acetate; expression reduced after exposure to farnesol	NA	-1.68873	8.68802e-29	-1.32009	1.11671e-17	-1.59777	1.02244e-26	-1.22913	1.99062e-15
number of genes in the group:			12
up-regulated genes in the group:				0		3		1		1
down-regulated genes in the group:				8		7		5		6
stress responsive/AtfA-dependent genes in the group:				8		10		6		7
number of the studied genes:			10748
up-regulated genes (total):				1875		2482		2840		2487
down-regulated genes (total):				1985		2514		2643		2386
stress responsive genes (total):				3860		4996		5483		4873
p-value for up-regulated genes (Fisher's exact test):				1		0.5482		0.9749		0.9576
p-value for down-regulated genes (Fisher's exact test):				0.000325		0.009723		0.1492		0.03166
p-value for stress responsive/AtfA-dependent genes (Fisher's exact test):				0.02986		0.01037		0.64		0.2685

## Sheet: S metabolism
Supplementary Table S5 RNAseq data and the results of enrichment analyses of the studied gene groups
Sheet 4 - S metabolism genes (Cys, Met and GSH metabolism genes, folate cycle genes, Fe-S cluster binding protein genes)
Cys, Met and GSH metabolism genes
GENE ID	Gene name	Feature (AspGD)	Description	log2FC	adj. p-value	log2FC	adj. p-value	log2FC	adj. p-value	log2FC	adj. p-value
				reference strain, Cd treated vs.	reference strain, untreated	DatfA mutant, Cd treated vs.	DatfA mutant, untreated	DatfA mutant, untreated vs.	reference strain, untreated	DatfA mutant, Cd treated vs.	reference strain, Cd treated
AN1222	sasA	Putative S-adenosylmethionine synthetase; predicted role in methionine metabolism; expression reduced after exposure to farnesol; strongly expressed during vegetative growth, downregulated during development in asexual or sexual cultures	Cys and Met synthesys/metabolis	-0.325761	8.23341e-06	-0.544554	4.654e-15	-0.242802	0.000742958	-0.461595	4.61135e-11
AN6576	AN6576	Ortholog(s) have acireductone dioxygenase (Ni2+-requiring) activity and role in L-methionine salvage from methylthioadenosine	Cys and Met synthesys/metabolis	-0.271913	0.0238374	-0.329818	0.0030128	0.339104	0.00217415	0.281199	0.0149861
AN3378	AN3378	Putative homocysteine S-methyltransferase with a predicted role in sulfur amino acid metabolism	Cys and Met synthesys/metabolis	-0.577683	0.00269639	-0.159149	0.415818	0.305198	0.0948835	0.723732	5.22475e-05
AN4443	metH	Putative methionine synthase with a predicted role in methionine metabolism; protein expressed at increased levels in a hapX mutant versus wild-type	Cys and Met synthesys/metabolis	-0.772511	3.64866e-11	-0.987581	2.55347e-18	0.134563	0.301105	-0.0805077	0.586635
AN6638	dmtA	Protein with homology to cytosine methyltransferases; required for early sexual development and formation of viable ascospores; dmtA locus also encodes an anti-sense transcript tmdA	Cys and Met synthesys/metabolis	-1.04495	0.00312718	-0.642722	0.0782818	-0.581274	0.0909074	-0.179046	0.695187
AN3593	AN3593	Ortholog(s) have methylthioribulose 1-phosphate dehydratase activity and role in L-methionine salvage from methylthioadenosine	Cys and Met synthesys/metabolis	-1.12696	7.29571e-16	-1.15186	1.45174e-17	0.171216	0.260449	0.146312	0.393947
AN8231	AN8231	Putative S-adenosylmethionine decarboxylase with a predicted role in arginine metabolism	Cys and Met synthesys/metabolis	-0.699198	5.78407e-09	-1.24096	6.12274e-27	-0.169175	0.190724	-0.710941	2.18672e-09
AN0687	spdA	Putative spermine or spermidine synthase with a predicted role in arginine metabolism; transcript upregulated in response to camptothecin; protein induced by farnesol	Cys and Met synthesys/metabolis	-0.793674	1.50547e-12	-1.21956	2.10934e-29	0.0621218	0.639383	-0.363769	0.001866
AN1446	mecB	Cystathionine gamma-lyase, an enzyme involved in methionine, S-adenosylmethionine, and cysteine biosynthesis	Cys and Met synthesys/metabolis	0.392715	0.000541798	1.13751	5.05234e-27	-1.11855	3.85459e-26	-0.373762	0.000775038
AN4793	AN4793	Putative aspartate semialdehyde dehydrogenase with a predicted role in glycine, serine, and threonine metabolism	Cys and Met synthesys/metabolis	0.541185	1.9375e-06	0.969577	9.55729e-20	0.364396	0.00124997	0.792788	1.50969e-13
AN7051	metG	Cystathionine beta-lyase, enzyme of the methionine biosynthesis pathway; mutants show a reduced rate of DNA damage repair	Cys and Met synthesys/metabolis	0.560274	2.09814e-07	0.826149	9.52307e-17	0.316738	0.00367935	0.582613	7.00503e-09
AN8277	cysD	Putative bifunctional enzyme with a predicted role in methionine metabolism; O-acetlylhomoserine (homocysteine synthase)	Cys and Met synthesys/metabolis	0.64871	3.8452e-18	1.02089	1.34402e-45	0.332903	1.03159e-05	0.705079	2.35099e-22
AN5019	AN5019	Has domain(s) with predicted 5-methyltetrahydropteroyltriglutamate-homocysteine S-methyltransferase activity, zinc ion binding activity and role in methionine biosynthetic process	Cys and Met synthesys/metabolis	1.48748	3.68551e-07	1.84203	1.70412e-15	1.02822	0.00051277	1.38277	1.23391e-09
AN5820	mecA	Cystathionine beta-synthase, an enzyme involved in methionine, S-adenosylmethionine, and cysteine biosynthesis; intracellular, menadione stress-induced protein	Cys and Met synthesys/metabolis	0.604868	1.12917e-12	0.664311	6.82401e-16	-0.0512246	0.614321	0.00821792	0.94917
AN4290	AN4290	Ortholog(s) have S-methyl-5-thioribose-1-phosphate isomerase activity and role in L-methionine salvage from methylthioadenosine	Cys and Met synthesys/metabolis	0.252317	0.0273083	-0.0594324	0.647576	0.19235	0.0827692	-0.1194	0.325965
AN1263	AN1263	Putative adenosylhomocysteinase with a predicted role in methionine metabolism; expression reduced after exposure to farnesol	Cys and Met synthesys/metabolis	-0.14788	0.145132	-0.586316	1.08943e-11	0.147615	0.118381	-0.290821	0.00138803
AN8057	cysB	Cysteine synthase; plays a role in amino acid metabolism	Cys and Met synthesys/metabolis	-0.222253	0.0839193	-0.476492	1.72541e-05	1.08947	7.31813e-24	0.83523	3.00838e-14
AN8565	cysA	Putative serine O-acetyltransferase with a predicted role in cysteine metabolism	Cys and Met synthesys/metabolis	0.00697037	0.963508	0.246985	0.0176356	0.368232	0.000316501	0.608247	7.49781e-10
AN2882	AN2882	Putative homoserine dehydrogenase with a predicted role in glycine, serine, and threonine metabolism; protein expressed at increased levels during osmoadaptation	Cys and Met synthesys/metabolis	0.142275	0.281327	-0.0398857	0.783842	0.427663	0.000107072	0.245502	0.0366289
AN8859	AN8859	Putative aspartate kinase with a predicted role in glycine, serine, and threonine metabolism	Cys and Met synthesys/metabolis	0.02422	0.907333	0.128061	0.423084	1.11853	8.76319e-17	1.22237	4.7082e-20
AN11168	AN11168	Ortholog(s) have cytoplasm, nucleus localization	Cys and Met synthesys/metabolis	0.210007	0.111842	0.0572814	0.692949	0.618414	5.41113e-08	0.465688	5.96041e-05
AN2229	metE	Putative O-acetyltransferase with a predicted role in amino acid metabolism	Cys and Met synthesys/metabolis	0.0738202	0.673413	1.02588	1.69883e-16	0.048431	0.760783	1.00049	1.00687e-15
AN3456	AN3456	Putative cystathionine gamma-synthase with a predicted role in methionine metabolism	Cys and Met synthesys/metabolis	0.182277	0.270025	0.904209	2.15018e-11	0.0251654	0.886816	0.747098	4.44318e-08
AN1513	cysF	Putative cysteine synthase or cystathionine beta-synthase with a predicted role in amino acid metabolism	Cys and Met synthesys/metabolis	-0.0836129	0.683321	-0.670317	1.80367e-06	0.656264	5.19786e-06	0.0695605	0.724533
AN7113	AN7113	Ortholog of A. fumigatus Af293 : Afu4g03930, A. niger CBS 513.88 : An14g00960, A. oryzae RIB40 : AO090011000336, Aspergillus wentii : Aspwe1_0043297 and Aspergillus sydowii : Aspsy1_0158610	Cys and Met synthesys/metabolis	2.24864	NA	0.777897	0.624375	3.1677	0.0840264	1.69696	0.304877
AN10230	AN10230	Ortholog(s) have S-methyl-5-thioadenosine phosphorylase activity, mRNA binding activity, role in L-methionine salvage from methylthioadenosine, glutamate biosynthetic process and cytoplasm localization	Cys and Met synthesys/metabolis	0.0447096	0.791958	-0.112628	0.411583	1.11446	3.04722e-22	0.957126	9.09942e-17
AN5658	AN5658	Has domain(s) with predicted glutathione hydrolase activity and role in glutathione catabolic process	glutathione degradation	-0.498233	0.000492359	-0.243623	0.0933717	0.0387927	0.816225	0.293403	0.0457071
AN1879	dugB	Ortholog(s) have glutathione hydrolase activity, omega peptidase activity, peptidase activity, role in glutathione catabolic process and cytoplasm, glutathione hydrolase complex, nuclear periphery localization	glutathione degradation	0.355826	6.48922e-05	0.457253	9.13134e-08	-0.335719	0.000122612	-0.234292	0.00889432
AN2988	AN2988	Ortholog(s) have gamma-glutamylcyclotransferase activity and role in glutathione catabolic process	glutathione degradation	0.818488	5.78407e-09	1.45895	4.09847e-31	0.361565	0.0133444	1.00203	1.08651e-15
AN1092	dugC	Ortholog(s) have glutathione hydrolase activity, omega peptidase activity, peptidase activity, role in glutathione catabolic process and cytoplasm, glutathione hydrolase complex localization	glutathione degradation	0.499613	4.89513e-05	0.574818	8.02789e-07	-0.106904	0.446129	-0.0316994	0.840567
AN3459	dugA	Ortholog(s) have dipeptidase activity, metallodipeptidase activity, omega peptidase activity, role in glutathione catabolic process and cytoplasm, fungal biofilm matrix localization	glutathione degradation	-0.0777112	0.451142	-0.116066	0.209365	-0.262943	0.00169573	-0.301297	0.000345261
AN10444	ggtA	Gamma-glutamyl transpeptidase, involved in sexual development	glutathione degradation	0.236863	0.0637154	0.149998	0.239062	0.0619309	0.65017	-0.0249343	0.875232
AN7729	AN7729	Ortholog(s) have ATPase-coupled glutathione S-conjugate transmembrane transporter activity, ATPase-coupled phytochelatin transmembrane transporter activity, bilirubin transmembrane transporter activity	glutathione related transport	0.697471	1.92446e-08	1.05982	2.23705e-19	0.189329	0.156587	0.551678	5.60209e-06
AN4517	AN4517	Ortholog(s) have ATPase-coupled phytochelatin transmembrane transporter activity, ATPase-coupled transmembrane transporter activity	glutathione related transport	-0.103956	0.400963	-0.163216	0.142774	-0.474206	1.97773e-06	-0.533466	9.41065e-08
AN7188	AN7188	Ortholog(s) have glutathione transmembrane transporter activity and role in glutathione import across plasma membrane, glutathione transmembrane transport	glutathione related transport	0.0629229	0.786325	-0.444853	0.00938095	0.326249	0.0618656	-0.181527	0.355902
AN7702	AN7702	Ortholog(s) have oligopeptide transmembrane transporter activity, tripeptide transmembrane transporter activity and role in glutathione transmembrane transport, transmembrane transport, tripeptide transport	glutathione related transport	-2.79277	NA	1.19686	0.583461	-1.93894	0.320048	2.05069	0.360352
AN12476	AN12476	Ortholog(s) have glutathione synthase activity	glutathione synthesys	-0.332376	0.00551608	-0.246521	0.0360814	-0.110811	0.377265	-0.0249555	0.874517
AN3150	AN3150	Putative gamma-glutamylcysteine synthetase with a predicted role in glutathione biosynthesis	glutathione synthesys	-0.216737	0.390448	0.1516	0.546518	-1.03155	3.84739e-07	-0.663217	0.00180289
AN4769	sC	ATP sulfurylase involved in sulfate assimilation; mutants are resistant to selenate	sulfate assimilation	-1.11994	1.25036e-12	-1.9025	5.41258e-36	0.401144	0.0129116	-0.381415	0.0253034
AN1194	sD	Adenylyl phosphosulfate kinase involved in sulfate assimilation	sulfate assimilation	-0.76732	4.63452e-13	-0.600315	4.52546e-09	0.451279	1.36382e-05	0.618284	3.65378e-09
AN1769	AN1769	Putative 3'-5' bisphosphate nucleotidase with a predicted role in cysteine metabolism; protein expressed at increased levels during osmoadaptation	sulfate assimilation	-0.624338	6.5988e-09	-0.66375	9.4524e-11	0.413558	7.87374e-05	0.374146	0.000625604
AN4770	sA	Adenosine 3-phosphate 5-phosphosulfate (PAPS) reductase involved in sulfate assimilation	sulfate assimilation	0.511651	0.000596303	-0.405022	0.00613701	-0.0856055	0.609728	-1.00228	6.01749e-13
AN8058	AN8058	Has domain(s) with predicted electron transfer activity, metal ion binding, molybdenum ion binding, oxidoreductase activity and role in nitrate assimilation, oxidation-reduction process	sulfate assimilation	-0.435376	0.242449	0.381897	0.59454	-3.62074	2.65119e-14	-2.80347	1.34531e-10
AN7600	AN7600	Ortholog(s) have role in hydrogen sulfide biosynthetic process, sulfate assimilation, sulfur amino acid biosynthetic process	sulfate assimilation	0.163732	0.332348	-1.07295	2.78338e-15	0.483699	0.000577321	-0.752987	5.75627e-08
AN1498	AN1498	Ortholog(s) have bis(5'-nucleosyl)-tetraphosphatase activity and role in nucleoside catabolic process	sulfate assimilation	-0.179926	0.171621	-0.217377	0.0585026	0.393036	0.00039317	0.355586	0.00183548
AN1825	AN1825	Putative sulfide:quinone oxidoreductase; transcript repressed by nitrogen limitation	sulfate assimilation	0.547279	0.565631	2.32424	0.00024535	0.11554	0.904686	1.8925	0.00207358
AN1752	sF	Putative sulfite reductase with a predicted role in sulfur metabolism	sulfate assimilation	-0.131867	0.60801	-1.57439	8.43025e-17	1.04441	4.77252e-08	-0.398108	0.0621688
AN7034	AN7034	Putative 3'-5' bisphosphate nucleotidase with a predicted role in cysteine metabolism	sulfate assimilation	-0.256138	0.0728258	-0.646584	8.55426e-08	0.45325	0.000251454	0.0628048	0.706171
AN5855	AN5855	Has domain(s) with predicted ATP adenylyltransferase activity	sulfate assimilation	-0.16488	0.52697	-0.0648271	0.801712	0.302954	0.157234	0.403006	0.059847
AN2730	sB	Putative transporter with a predicted role in small molecule transport; transcript negatively regulated by sulfate and methionine	sulfate uptake	2.18798	3.49608e-26	1.33949	5.17247e-12	1.04672	9.44679e-07	0.198234	0.394195
AN0066	AN0066	Ortholog(s) have isopropylmalate transmembrane transporter activity, malonate(1-) transmembrane transporter activity, oxaloacetate transmembrane transporter activity, sulfate transmembrane transporter activity	sulfate uptake	0.509289	4.38394e-06	-0.0133854	0.926671	0.697701	2.6043e-11	0.175026	0.121215
AN3157	AN3157	Has domain(s) with predicted sulfate transmembrane transporter activity, role in sulfate transport and integral component of membrane localization	sulfate uptake	0.308445	0.0136623	0.118114	0.372642	0.213382	0.0826675	0.0230511	0.886699
AN2560	AN2560	Ortholog of A. fumigatus Af293 : Afu3g15020, A. niger CBS 513.88 : An09g01090, A. oryzae RIB40 : AO090701000425, Aspergillus wentii : Aspwe1_0071504 and Aspergillus sydowii : Aspsy1_0028937	Met uptake	0.34925	0.749071	1.4775	0.220448	-2.16859	0.0508515	-1.04035	0.274136
AN1631	AN1631	Ortholog(s) have L-methionine secondary active transmembrane transporter activity, role in methionine import across plasma membrane, sulfur amino acid transport and plasma membrane localization	Met/Cys uptake	0.812052	0.000202374	-0.505189	0.0145744	1.11837	4.67537e-08	-0.198871	0.409369
AN8538	AN8538	Ortholog of A. niger CBS 513.88 : An12g09900, A. oryzae RIB40 : AO090003001519, Aspergillus versicolor : Aspve1_0178418 and Aspergillus niger ATCC 1015 : 181097-mRNA, 194913-mRNA	Met uptake	0.207907	0.31023	0.427044	0.0097439	0.400049	0.0220837	0.619186	0.00015599
AN12483	AN12483	Ortholog of A. fumigatus Af293 : Afu7g00730, A. niger CBS 513.88 : An08g07770, A. oryzae RIB40 : AO090038000414 and Aspergillus wentii : Aspwe1_0063395	Met uptake	0.687238	0.0167978	0.247817	0.487641	-0.780708	0.00980035	-1.22013	6.22154e-06
number of genes in the group:			56
up-regulated genes in the group:				17		16		24		22
down-regulated genes in the group:				13		19		8		14
stress responsive/AtfA-dependent genes in the group:				30		35		32		36
number of the studied genes:			10748
up-regulated genes (total):				1875		2482		2840		2487
down-regulated genes (total):				1985		2514		2643		2386
stress responsive genes (total):				3860		4996		5483		4873
p-value for up-regulated genes (Fisher's exact test):				0.01238		0.2044		0.005544		0.004914
p-value for down-regulated genes (Fisher's exact test):				0.2233		0.04775		0.9798		0.3556
p-value for stress responsive/AtfA-dependent genes (Fisher's exact test):				0.005067		0.01142		0.2162		0.003261
Folate cycle genes
GENE ID	Gene name	Feature (AspGD)	Description	log2FC	adj. p-value	log2FC	adj. p-value	log2FC	adj. p-value	log2FC	adj. p-value
				reference strain, Cd treated vs.	reference strain, untreated	DatfA mutant, Cd treated vs.	DatfA mutant, untreated	DatfA mutant, untreated vs.	reference strain, untreated	DatfA mutant, Cd treated vs.	reference strain, Cd treated
AN5883	metF	Putative methylenetetrahydrofolate reductase (NADPH) with predicted role in one-carbon metabolism; mutation causes methionine auxotrophy and decreased mycelial pigment production; expression induced by homocysteine and decreased by farnesol		-0.198481	0.0357517	-0.223414	0.0131235	-0.348633	4.96356e-05	-0.373565	1.67973e-05
AN8215	metA	Putative methylenetetrahydrofolate reductase (NADPH) with a predicted role in one-carbon metabolism; metA expression is induced by homocysteine; mutation causes methionine auxotrophy		-0.338612	0.0263037	-0.626013	2.81263e-06	0.730118	4.60232e-08	0.442717	0.00184776
AN7028	AN7028	Putative thymidylate synthase with a predicted role in pyrimidine metabolism		0.502055	2.87533e-05	0.213584	0.0746079	0.672385	3.2064e-09	0.383914	0.000824744
AN3058	AN3058	Putative glycine hydroxymethyltransferase with a predicted role in glycine, serine, and threonine metabolism		-0.276922	0.0071619	-0.386664	6.17531e-05	0.161984	0.115236	0.0522416	0.676434
AN1198	AN1198	Putative aminomethyltransferase with a predicted role in glycine, serine, and threonine metabolism		-2.04432	9.5708e-34	-2.28985	7.20402e-44	0.22658	0.212317	-0.0189443	0.945276
AN4776	AN4776	Ortholog of S. cerevisiae : FSH3, A. fumigatus Af293 : Afu3g06620, A. niger CBS 513.88 : An18g00880, An11g09680, A. oryzae RIB40 : AO090020000337 and Aspergillus wentii : Aspwe1_0563966		0.335306	0.0250039	0.00348982	0.984677	1.02063	2.30578e-15	0.688818	5.25565e-08
AN6108	AN6108	Ortholog(s) have dihydrofolate reductase activity, drug binding activity		0.308961	0.0273971	-0.114889	0.414634	0.711802	7.80268e-09	0.287951	0.0269825
AN5738	AN5738	Ortholog(s) have methionyl-tRNA formyltransferase activity, role in conversion of methionyl-tRNA to N-formyl-methionyl-tRNA and mitochondrion localization		0.417697	0.00183903	-0.173969	0.185811	0.688552	2.05592e-08	0.0968874	0.516438
AN0495	AN0495	Has domain(s) with predicted amino acid binding, formyltetrahydrofolate deformylase activity, hydroxymethyl-, formyl- and related transferase activity and role in 'de novo' IMP biosynthetic process, biosynthetic process, metabolic process		1.54552	1.05995e-23	2.16871	1.23711e-48	0.481187	0.00292251	1.10438	1.51178e-13
AN4464	purH	Putative bifunctional enzyme with a predicted role in purine metabolism; protein expressed at increased levels in a hapX mutant versus wild-type		-0.672876	8.76535e-12	-1.15432	2.75909e-34	0.247334	0.0144524	-0.234111	0.0268771
AN2998	AN2998	Putative multifunctional enzyme with a predicted role in one-carbon metabolism; palA-dependent expression independent of pH		-1.25463	1.20231e-42	-1.83568	4.6726e-91	-0.0229785	0.846192	-0.604027	1.86021e-10
AN1198	AN1198	Putative aminomethyltransferase with a predicted role in glycine, serine, and threonine metabolism		-2.04432	9.5708e-34	-2.28985	7.20402e-44	0.22658	0.212317	-0.0189443	0.945276
AN1524	AN1524	Putative methylenetetrahydrofolate dehydrogenase (NAD+) with a predicted role in one-carbon metabolism		0.226403	0.0293673	-0.120749	0.238613	0.73411	5.7878e-16	0.386958	3.23299e-05
number of genes in the group:			13
up-regulated genes in the group:				6		1		8		6
down-regulated genes in the group:				7		7		1		3
stress responsive/AtfA-dependent genes in the group:				13		8		9		9
number of the studied genes:			10748
up-regulated genes (total):				1875		2482		2840		2487
down-regulated genes (total):				1985		2514		2643		2386
stress responsive genes (total):				3860		4996		5483		4873
p-value for up-regulated genes (Fisher's exact test):				0.01573		0.9671		0.008084		0.05757
p-value for down-regulated genes (Fisher's exact test):				0.004384		0.01686		0.9746		0.5769
p-value for stress responsive/AtfA-dependent genes (Fisher's exact test):				1.632e-06		0.2087		0.1499		0.07314
Fe-S cluster binding protein genes
GENE ID	Gene name	Feature (AspGD)	Description	log2FC	adj. p-value	log2FC	adj. p-value	log2FC	adj. p-value	log2FC	adj. p-value
				reference strain, Cd treated vs.	reference strain, untreated	DatfA mutant, Cd treated vs.	DatfA mutant, untreated	DatfA mutant, untreated vs.	reference strain, untreated	DatfA mutant, Cd treated vs.	reference strain, Cd treated
AN9103	aifA	Putative apoptosis-inducing factor (AIF)-like mitochondrial oxidoreductase; mutants display decreased survival in the presence of farnesol or menadione, decreased electron transport; expression upregulated after exposure to farnesol	2 iron, 2 sulfur cluster binding	-1.20262	3.03591e-31	-0.320913	0.00467744	-1.54658	3.88035e-52	-0.66487	6.26508e-10
AN6639	mcdB	Putative 2-methylcitrate dehydratase with a predicted role in lysine metabolism	2 iron, 2 sulfur cluster binding	-1.38308	5.53536e-24	-1.59643	1.99753e-32	-0.093021	0.566534	-0.306374	0.0442713
AN5525	acoA	Putative aconitate hydratase with a predicted role in the TCA cycle; intracellular; protein abundance decreased by menadione stress; protein expressed at increased levels in a hapX mutant versus wild-type	4 iron, 4 sulfur cluster binding	-2.35246	3.76583e-37	-2.93742	2.2911e-58	-0.385922	0.0534905	-0.970885	3.51117e-07
AN4297	AN4297	Ortholog(s) have role in iron-sulfur cluster assembly, mitochondrial respiratory chain complex I assembly and mitochondrial respiratory chain complex I, peripheral segment, mitochondrion, plasma membrane localization	4 iron, 4 sulfur cluster binding	-0.456236	6.91968e-07	-0.554528	2.35736e-10	0.605869	3.70273e-12	0.507577	1.18034e-08
AN5703	AN5703	Putative electron-transferring-flavoprotein dehydrogenase with a predicted role in energy metabolism	4 iron, 4 sulfur cluster binding	-0.883737	1.53369e-16	-1.33242	1.1158e-39	0.823336	6.69431e-16	0.374653	0.000783678
AN5134	gltA	Glutamate synthase, NAD(+)-dependent (GOGAT) with a predicted role in glutamate and glutamine metabolism; required for ammonium uptake in the absence of NADP-glutamate dehydrogenase GdhA; transcript upregulated by nitrate limitation	iron-sulfur cluster binding	-0.783384	2.66661e-06	-1.42974	1.28677e-19	1.10826	2.96984e-12	0.461898	0.0068817
AN6643	bioB	Putative biotin synthase with a predicted role in Coenzyme A and pantothenate biosynthesis	iron-sulfur cluster binding	-0.683888	3.05663e-09	-0.684853	4.32816e-10	1.04096	7.8565e-22	1.04	2.92994e-21
AN7611	AN7611	Has domain(s) with predicted catalytic activity, iron-sulfur cluster binding activity	iron-sulfur cluster binding	-0.494669	0.00436732	-0.349885	0.0165244	0.970154	2.40465e-11	1.11494	1.28413e-13
AN1915	AN1915	Ortholog(s) have 2 iron, 2 sulfur cluster binding, electron transfer activity, iron-sulfur cluster binding, oxidoreductase activity, acting on NAD(P)H, oxidoreductase activity, acting on NAD(P)H, heme protein as acceptor activity	2 iron, 2 sulfur cluster binding	-0.444221	0.00688899	-1.15047	5.65573e-15	0.714129	1.82364e-06	0.00787954	0.970976
AN2306	AN2306	Putative ubiquinol-cytochrome-c reductase subunit with a predicted role in energy metabolism; intracellular, menadione stress-induced protein	2 iron, 2 sulfur cluster binding	-0.494017	5.73396e-05	-1.14969	9.20224e-24	0.506521	1.7337e-05	-0.149156	0.280807
AN5629	AN5629	Putative NADH dehydrogenase (ubiquinone) with a predicted role in energy metabolism	4 iron, 4 sulfur cluster binding	-0.555614	8.12085e-08	-0.993596	3.71446e-24	0.477392	2.0224e-06	0.0394093	0.776026
AN6521	lysF	Homoaconitate hydratase, enzyme of the lysine biosynthesis pathway; negatively regulated by the CCAAT-binding complex AnCF (HapB/C/E)	4 iron, 4 sulfur cluster binding	-0.885182	3.89334e-09	-1.87457	1.28441e-39	0.706875	1.08258e-06	-0.28251	0.0889219
AN4288	AN4288	Protein expressed at decreased levels in a hapX mutant versus wild-type; AN4288 and AN9411 in version 4 of the A. nidulans annotation were identical, AN9411 has been merged with AN4288 such that AN4288 remains and AN9411 was deleted	iron-sulfur cluster binding	-0.675272	1.11033e-19	-0.970329	3.92761e-41	0.172015	0.0277441	-0.123043	0.148024
AN7752	AN7752	Ortholog(s) have 2 iron, 2 sulfur cluster binding, ferrochelatase activity, role in heme biosynthetic process and mitochondrial inner membrane localization	2 iron, 2 sulfur cluster binding	-0.621092	4.70603e-06	-0.599014	4.47289e-06	0.253962	0.0662438	0.27604	0.0547655
AN0947	cnxABC	Protein required for the synthesis of precursor Z, an intermediate in the molybdopterin cofactor biosynthesis pathway; molybdopterin cofactor is required for the activity of nitrate reductase	4 iron, 4 sulfur cluster binding	-0.290266	0.0104745	-0.340646	0.00149775	-0.0188527	0.887423	-0.0692336	0.606111
AN10237	AN10237	Has domain(s) with predicted iron-sulfur cluster binding, structural molecule activity and role in iron-sulfur cluster assembly, protein maturation by iron-sulfur cluster transfer	iron-sulfur cluster binding	-0.993666	3.6016e-15	-1.01955	1.91321e-16	-0.231347	0.0868371	-0.257227	0.0650374
AN2332	AN2332	Putative succinate dehydrogenase with a predicted role in the TCA cycle	iron-sulfur cluster binding	-1.30764	2.47519e-20	-1.53978	1.15555e-28	-0.0545011	0.754453	-0.286648	0.0695624
AN4655	AN4655	Ortholog(s) have 2 iron, 2 sulfur cluster binding, ATPase activator activity, ferrous iron binding, iron ion binding, iron-sulfur cluster binding, iron-sulfur cluster carrier activity, zinc ion binding activity	2 iron, 2 sulfur cluster binding	0.491609	4.1994e-07	0.538672	1.38265e-08	-0.614804	6.4395e-11	-0.567741	1.58783e-09
AN0447	AN0447	Has domain(s) with predicted iron ion binding, iron-sulfur cluster binding activity and role in iron-sulfur cluster assembly	iron-sulfur cluster binding	0.532368	1.24571e-06	0.74147	7.32336e-13	0.621869	3.69825e-09	0.830971	6.99539e-16
AN4304	AN4304	Ortholog(s) have 2 iron, 2 sulfur cluster binding, disulfide oxidoreductase activity, glutathione disulfide oxidoreductase activity	2 iron, 2 sulfur cluster binding	0.308373	0.0148167	0.479737	3.38893e-05	0.162983	0.202268	0.334347	0.00539318
AN7567	AN7567	Ortholog(s) have 2 iron, 2 sulfur cluster binding, RNA polymerase II activating transcription factor binding, disulfide oxidoreductase activity, glutathione disulfide oxidoreductase activity, iron-sulfur cluster binding activity	2 iron, 2 sulfur cluster binding	1.19395	1.87286e-18	0.663311	1.07534e-06	0.450064	0.00140219	-0.0805751	0.645195
AN8485	AN8485	Has domain(s) with predicted iron-sulfur cluster binding activity, role in apoptotic process, iron-sulfur cluster assembly and cytoplasm localization	iron-sulfur cluster binding	0.549307	2.03719e-06	-0.0265289	0.86643	0.517101	4.17379e-06	-0.0587345	0.690672
AN0502	AN0502	Putative ortholog of S. cerevisiae Tyw1p with a predicted role in wybutosine biosynthesis; expression reduced after exposure to farnesol	iron-sulfur cluster binding	0.445745	0.00367056	-0.17781	0.269051	0.61964	1.49342e-05	-0.00391441	0.985374
AN11251	AN11251	Has domain(s) with predicted 4 iron, 4 sulfur cluster binding, NADH dehydrogenase (ubiquinone) activity, oxidoreductase activity, acting on NAD(P)H, quinone binding activity and role in oxidation-reduction process	4 iron, 4 sulfur cluster binding	3.03927	2.84421e-10	3.2237	6.64684e-13	-0.0809487	0.913131	0.103482	0.807711
AN3632	AN3632	Ortholog(s) have role in iron-sulfur cluster assembly and cytosol, membrane localization	iron-sulfur cluster binding	-0.256691	0.158229	-0.0887879	0.656728	-0.68311	1.39417e-05	-0.515206	0.00158618
AN5953	AN5953	Ortholog(s) have iron ion binding activity and role in biotin biosynthetic process, iron-sulfur cluster assembly, protein maturation by [4Fe-4S] cluster transfer, protein maturation by iron-sulfur cluster transfer	iron-sulfur cluster binding	-0.0977297	0.548976	-0.164841	0.253523	-0.400721	0.00191498	-0.467832	0.000315712
AN2779	AN2779	Has domain(s) with predicted catalytic activity, hydrolase activity, iron-sulfur cluster binding activity	iron-sulfur cluster binding	0.531502	0.437867	0.68718	0.415554	-1.69103	0.0170706	-1.53536	0.0134388
AN5613	hxA	Xanthine dehydrogenase (purine hydroxylase I) involved in purine catabolism; requires a molybdenum cofactor for function; induction by uric acid requires the product of the uaY regulatory gene	iron-sulfur cluster binding	-0.118937	0.391581	-0.0398605	0.798427	-1.41899	1.5597e-38	-1.33991	1.75504e-34
AN3894	AN3894	Putative aconitate hydratase with a predicted role in the TCA cycle	4 iron, 4 sulfur cluster binding	-0.307445	0.159202	-1.77425	2.631e-22	0.733347	9.38787e-05	-0.733458	0.000154411
AN7600	AN7600	Ortholog(s) have role in hydrogen sulfide biosynthetic process, sulfate assimilation, sulfur amino acid biosynthetic process	iron-sulfur cluster binding	0.163732	0.332348	-1.07295	2.78338e-15	0.483699	0.000577321	-0.752987	5.75627e-08
AN5797	AN5797	Ortholog(s) have 2 iron, 2 sulfur cluster binding, diphosphoinositol-pentakisphosphate kinase activity and inositol 1,5-bisdiphosphate 2,3,4,6-tetrakisphosphate 1-diphosphatase activity, more	2 iron, 2 sulfur cluster binding	0.198024	0.0824956	-0.0184501	0.89852	-0.172118	0.117216	-0.388591	0.000157754
AN12201	AN12201	Ortholog(s) have oxidoreductase activity, acting on NAD(P)H, heme protein as acceptor activity, role in heme a biosynthetic process, iron-sulfur cluster assembly, ubiquinone biosynthetic process and mitochondrial matrix localization	2 iron, 2 sulfur cluster binding	-0.193182	0.255884	-0.55412	3.27895e-05	1.0084	4.7915e-14	0.647459	3.48497e-06
AN3296	AN3296	Has domain(s) with predicted 2 iron, 2 sulfur cluster binding, oxidoreductase activity and role in oxidation-reduction process	2 iron, 2 sulfur cluster binding	0.341304	0.0861307	-0.295074	0.0617157	1.28341	2.14403e-15	0.647031	5.52445e-05
AN9486	AN9486	Ortholog(s) have role in protein lipoylation	4 iron, 4 sulfur cluster binding	0.0442607	0.721341	-0.0165801	0.893404	0.357181	7.66789e-05	0.296341	0.00123211
AN2155	AN2155	Ortholog(s) have 4 iron, 4 sulfur cluster binding, ATPase activity, iron ion binding activity, role in iron-sulfur cluster assembly, tRNA wobble uridine modification and Nbp35-Cfd1 ATPase complex, cytoplasm, nucleus localization	4 iron, 4 sulfur cluster binding	-0.237107	0.0830587	0.187696	0.155568	-0.0181083	0.905802	0.406694	0.00102777
AN10842	AN10842	Has domain(s) with predicted 2 iron, 2 sulfur cluster binding, iron ion binding, oxidoreductase activity, acting on paired donors, with incorporation or reduction of molecular oxygen and NAD(P)H as one donor, more	2 iron, 2 sulfur cluster binding	-0.0953584	0.596623	0.0496804	0.787683	-0.347006	0.0154376	-0.201968	0.194911
AN11060	AN11060	Ortholog(s) have 4 iron, 4 sulfur cluster binding, ATPase activity, role in iron-sulfur cluster assembly, tRNA wobble uridine modification and Nbp35-Cfd1 ATPase complex, cytoplasm localization	4 iron, 4 sulfur cluster binding	-0.208718	0.104202	0.217402	0.075018	-0.326789	0.00484074	0.0993305	0.473702
AN7364	AN7364	Has domain(s) with predicted 2 iron, 2 sulfur cluster binding, oxidoreductase activity and role in oxidation-reduction process	2 iron, 2 sulfur cluster binding	0.200963	0.220885	-0.196117	0.17625	0.490905	0.000371393	0.0938249	0.578062
AN2294	elp3	Putative GNAT-type acetyltransferase	iron-sulfur cluster binding	0.259966	0.138807	-0.168586	0.321995	0.646748	1.79273e-05	0.218197	0.199017
AN1007	niiA	Putative nitrite reductase with a predicted role in nitrogen metabolism; transcript stabilized by intracellular nitrate	2 iron, 2 sulfur cluster binding	-0.0765023	0.371058	-0.181578	0.0128342	0.0431831	0.598091	-0.0618925	0.470038
AN5300	AN5300	Putative aconitate hydratase with a predicted role in the TCA cycle	4 iron, 4 sulfur cluster binding	0.188992	0.654749	0.778713	0.021768	-0.565637	0.115446	0.0240837	0.958539
AN5886	luA	Alpha-isopropylmalate isomerase with a predicted role in valine, leucine, and isoleucine metabolism; protein expressed at increased levels in a hapX mutant versus wild-type; transcript is induced by nitrate; protein induced by farnesol	4 iron, 4 sulfur cluster binding	0.135561	0.502453	0.365351	0.0291167	0.0812169	0.668758	0.311007	0.0721721
AN10493	AN10493	Has domain(s) with predicted 2 iron, 2 sulfur cluster binding, oxidoreductase activity and role in oxidation-reduction process	2 iron, 2 sulfur cluster binding	0	NA	0.857614	NA	0	NA	0.794975	NA
AN10836	AN10836	Has domain(s) with predicted 2 iron, 2 sulfur cluster binding, iron ion binding, oxidoreductase activity, oxidoreductase activity and acting on paired donors, more	2 iron, 2 sulfur cluster binding	0.619011	0.508424	0.549368	0.485537	0.475582	0.583303	0.40594	0.626486
AN6756	AN6756	Has domain(s) with predicted 2 iron, 2 sulfur cluster binding, iron ion binding, oxidoreductase activity and role in cellular aromatic compound metabolic process, oxidation-reduction process	2 iron, 2 sulfur cluster binding	0.217243	0.621625	0.642551	0.0715302	-0.331333	0.404033	0.0939749	0.829427
AN8656	AN8656	Has domain(s) with predicted 2 iron, 2 sulfur cluster binding, iron ion binding, oxidoreductase activity, oxidoreductase activity and acting on paired donors, more	2 iron, 2 sulfur cluster binding	0.505078	0.648544	0.821381	0.40693	-0.398947	0.713621	-0.0826441	0.94437
AN9178	AN9178	Has domain(s) with predicted UDP-N-acetylmuramate dehydrogenase activity, electron transfer activity, flavin adenine dinucleotide binding, iron-sulfur cluster binding, metal ion binding, oxidoreductase activity	iron-sulfur cluster binding	0.165175	NA	1.19299	0.512891	-2.65863	0.0773211	-1.63081	0.203436
number of genes in the group:			47
up-regulated genes in the group:				7		7		21		11
down-regulated genes in the group:				17		21		8		11
stress responsive/AtfA-dependent genes in the group:				24		28		29		22
number of the studied genes:			10748
up-regulated genes (total):				1875		2482		2840		2487
down-regulated genes (total):				1985		2514		2643		2386
stress responsive genes (total):				3860		4996		5483		4873
p-value for up-regulated genes (Fisher's exact test):				0.7354		0.9409		0.005162		0.5395
p-value for down-regulated genes (Fisher's exact test):				0.00311		0.001032		0.9208		0.4777
p-value for stress responsive/AtfA-dependent genes (Fisher's exact test):				0.02349		0.04887		0.09255		0.4759

## Sheet: DNA repair
Supplementary Table S5 RNAseq data and the results of enrichment analyses of the studied gene groups
Sheet 5 - DNA repair genes
DNA repair genes
GENE ID	Gene name	Feature (AspGD)	Description	log2FC	adj. p-value	log2FC	adj. p-value	log2FC	adj. p-value	log2FC	adj. p-value
				reference strain, Cd treated vs.	reference strain, untreated	DatfA mutant, Cd treated vs.	DatfA mutant, untreated	DatfA mutant, untreated vs.	reference strain, untreated	DatfA mutant, Cd treated vs.	reference strain, Cd treated
AN11828	AN11828	Ortholog(s) have role in double-strand break repair via homologous recombination, meiosis I and Smc5-Smc6 complex, nucleus localization	repair	-0.439596	0.0243549	-0.414694	0.0157838	0.494477	0.00411545	0.519379	0.00423117
AN5901	AN5901	Ortholog(s) have role in DNA-dependent DNA replication, double-strand break repair via break-induced replication	repair	-0.589433	0.00109923	-0.7469	8.94182e-07	0.729264	2.81352e-06	0.571797	0.000934002
AN2764	AN2764	Putative DNA repair protein; transcript upregulated in response to camptothecin	repair	-0.439266	0.00351189	-1.01534	8.52422e-14	0.329557	0.0209648	-0.24652	0.121558
AN4587	AN4587	Ortholog(s) have methylated-DNA-[protein]-cysteine S-methyltransferase activity and role in DNA dealkylation involved in DNA repair	repair	-0.567625	0.0328622	-1.18925	3.88449e-08	0.853489	0.000103193	0.231868	0.428001
AN6895	AN6895	Has domain(s) with predicted DNA helicase activity and role in DNA repair, telomere maintenance	repair	-0.449044	0.0170649	-0.957515	6.68249e-09	0.454189	0.00774642	-0.054282	0.821608
AN6069	AN6069	Ortholog(s) have DNA ligase (ATP) activity, DNA ligase activity, role in DNA ligation, DNA repair, Okazaki fragment processing involved in mitotic DNA replication and mitochondrion, nucleus localization	repair	-0.537265	3.76341e-06	-0.760139	7.12577e-12	-0.0359233	0.793394	-0.258798	0.0368936
AN5278	AN5278	Has domain(s) with predicted ATP binding, DNA helicase activity, helicase activity and role in DNA repair, telomere maintenance	repair	-0.360637	0.0001989	-0.295837	0.00154702	0.148019	0.134689	0.21282	0.0320017
AN3186	AN3186	Has domain(s) with predicted nuclease activity and role in DNA repair	repair	-0.365586	0.00721071	-0.350349	0.00607721	0.203436	0.128299	0.218673	0.117851
AN7465	AN7465	Ortholog(s) have double-stranded DNA binding activity	repair	-0.56969	1.2507e-07	-0.694785	1.60554e-11	0.15478	0.174328	0.0296858	0.840921
AN1231	AN1231	Has domain(s) with predicted DNA binding, DNA polymerase activity, DNA-directed DNA polymerase activity and role in DNA repair	repair	-0.958162	7.8788e-09	-0.195746	0.318448	-1.15726	7.36745e-13	-0.394846	0.0296982
AN4552	nkuB	Ortholog of Ku80; 80 kDa subunit of Ku70/Ku80 complex involved in non-homologous double-stranded break repair	repair	-0.487748	0.000508378	-0.246191	0.0845785	-0.0932609	0.54421	0.148297	0.35085
AN6583	AN6583	Has domain(s) with predicted phosphoric diester hydrolase activity, role in DNA repair and nucleus localization	repair	0.504081	0.00379822	0.557869	0.00115935	-0.503716	0.00401801	-0.449928	0.00725112
AN6054	AN6054	Ortholog(s) have single-stranded DNA binding activity and role in DNA repair, DNA strand renaturation, cellular response to drug, interstrand cross-link repair, mitochondrial genome maintenance, recombinational repair	repair	0.364342	0.000177111	0.206047	0.0306329	0.293172	0.0020354	0.134877	0.18593
AN1564	AN1564	Has domain(s) with predicted ATP binding, mismatched DNA binding activity and role in mismatch repair	repair	1.07464	0.000275186	1.0219	0.000184877	0.0830481	0.825668	0.0303107	0.936306
AN1796	AN1796	Ortholog(s) have role in DNA repair, GPI anchor biosynthetic process, hyphal growth and endoplasmic reticulum localization	repair	0.501509	8.44788e-05	0.290373	0.0208769	0.17997	0.184371	-0.0311663	0.849767
AN4555	AN4555	Ortholog(s) have role in maintenance of rDNA, mitotic DNA replication, postreplication repair and RecQ family helicase-topoisomerase III complex, nucleus, site of double-strand break localization	repair	0.602837	0.000456316	0.0301949	0.886789	0.688817	2.31591e-05	0.116175	0.541533
AN1976	AN1976	Ortholog(s) have role in DNA repair, cellular response to DNA damage stimulus, establishment or maintenance of cell polarity regulating cell shape and histone deacetylation, more	repair	0.247349	0.0339388	-0.112754	0.357219	0.0121798	0.928253	-0.347923	0.00126887
AN8014	AN8014	Has domain(s) with predicted ATP binding, DNA binding, DNA ligase (ATP) activity and role in DNA recombination, DNA repair	repair	0.386428	0.0093575	0.241555	0.109905	-0.172945	0.272464	-0.317818	0.0267798
AN11853	AN11853	Ortholog(s) have ATP binding, ATPase activity, DNA insertion or deletion binding, dinucleotide insertion or deletion binding, double-stranded DNA binding, heteroduplex DNA loop binding, single-stranded DNA binding activity	repair	0.0766851	0.668279	-0.457272	0.00144935	-0.392656	0.00482959	-0.926613	6.16639e-12
AN3940	AN3940	Ortholog(s) have role in DNA-dependent DNA replication, cellular protein localization, double-strand break repair via break-induced replication	repair	-0.0626498	0.831379	-0.469351	0.0124313	0.88149	4.09485e-06	0.474788	0.0213129
AN10962	AN10962	Ortholog(s) have 5'-3' exonuclease activity, damaged DNA binding activity and role in DNA repair, interstrand cross-link repair	repair	-0.0461853	0.820681	-0.582269	2.60841e-05	0.351547	0.0146013	-0.184537	0.259741
AN3035	AN3035	Has domain(s) with predicted DNA binding, catalytic activity, nuclease activity and role in DNA repair	repair	-0.0105749	0.958889	-0.356575	0.00829158	0.369945	0.00630134	0.0239441	0.900848
AN5574	AN5574	Ortholog(s) have role in DNA-dependent DNA replication, double-strand break repair via break-induced replication, mitotic DNA replication initiation	repair	-0.354689	0.084376	-0.836901	9.07414e-07	0.61836	0.000390015	0.136148	0.549161
AN7309	uvsH	Protein involved in DNA repair; mutants are sensitive to UV and show increased frequency of asexual recombination; transcript upregulated in response to camptothecin	repair	-0.00730332	0.980483	-0.72678	0.000325249	0.49557	0.0172833	-0.223907	0.358821
AN10322	AN10322	Has domain(s) with predicted ATP binding, DNA binding, DNA-dependent ATPase activity and role in DNA repair	repair	-0.630417	0.146815	-1.65829	4.30519e-05	0.057106	0.899963	-0.970762	0.0306977
AN1708	mshA	Putative MutS homolog with a predicted role in DNA mismatch repair; transcript upregulated in response to camptothecin	repair	-0.259412	0.0972474	-0.579693	3.21956e-05	-0.125887	0.42407	-0.446167	0.00194896
AN12151	AN12151	Ortholog(s) have O6-alkylguanine-DNA binding, damaged DNA binding activity and role in DNA dealkylation involved in DNA repair	repair	-0.0692634	0.901315	-1.022	0.00954087	0.321751	0.443114	-0.630985	0.148878
AN5617	AN5617	Has domain(s) with predicted ATP binding, DNA binding, nucleoside-triphosphatase activity, nucleotide binding activity and role in DNA repair	repair	-0.252828	0.0788563	-0.323805	0.0126851	0.182943	0.180671	0.111966	0.472497
AN6678	AN6678	Ortholog(s) have role in interstrand cross-link repair	repair	-0.0513094	0.90031	-0.837958	0.00235643	0.501908	0.0787646	-0.284741	0.392327
AN4365	AN4365	Ortholog(s) have role in meiotic mismatch repair, mismatch repair, reciprocal meiotic recombination and MutLgamma complex, nucleus localization	repair	0.182061	0.315743	0.690872	3.9689e-06	-0.373052	0.0188046	0.135759	0.449789
AN0097	AN0097	Ortholog(s) have role in DNA recombination, double-strand break repair via nonhomologous end joining and DNA ligase IV complex, nuclear chromatin, nucleolus, nucleus localization	repair	0.271857	0.0522279	0.416157	0.000694396	0.273953	0.0375047	0.418252	0.000749007
AN5344	uvsJ	Protein involved in DNA repair; some similarity to E2 ubiquitin-conjugating enzyme; transcript upregulated in response to camptothecin	repair	0.166163	0.0705367	0.412991	2.43543e-07	0.0259395	0.798955	0.272768	0.000982881
AN4519	AN4519	Has domain(s) with predicted DNA binding activity, role in DNA recombination, double-strand break repair and nucleus localization	repair	0.279245	0.159368	0.402169	0.027513	-0.329405	0.0796393	-0.206481	0.289773
AN10415	AN10415	Ortholog(s) have double-stranded DNA helicase activity, single-stranded DNA binding activity, role in double-strand break repair via homologous recombination and Smc5-Smc6 complex localization	repair	0.182333	0.142201	0.0400264	0.782346	-0.359696	0.00107986	-0.502003	3.46551e-06
AN6261	AN6261	Ortholog(s) have role in cellular response to DNA damage stimulus, double-strand break repair via homologous recombination, replication fork processing and nucleus localization	repair	-0.27563	0.0510712	-0.242445	0.0820405	-0.329087	0.0121393	-0.295902	0.0319868
AN3666	AN3666	Ortholog(s) have role in DNA strand elongation involved in mitotic DNA replication, DNA-dependent DNA replication, double-strand break repair via break-induced replication, mitotic DNA replication initiation	repair	0.31825	0.0570462	-0.0501909	0.784283	0.776323	8.15178e-08	0.407882	0.00568138
AN10119	AN10119	Ortholog(s) have RNA binding, poly(A) binding, poly(A)-specific ribonuclease activity, role in DNA repair, nuclear-transcribed mRNA poly(A) tail shortening, postreplication repair and PAN complex localization	repair	-0.0213958	0.906055	-0.0103092	0.955641	0.255401	0.0453921	0.266488	0.0398837
AN3644	AN3644	Ortholog(s) have ubiquitin conjugating enzyme activity, ubiquitin-protein transferase activity and role in free ubiquitin chain polymerization, postreplication repair, protein K63-linked ubiquitination, protein polyubiquitination	repair	-0.0415457	0.82544	-0.233735	0.100658	0.560815	1.93888e-05	0.368625	0.0075072
AN10536	AN10536	Has domain(s) with predicted DNA binding activity and role in DNA recombination, double-strand break repair	repair	0.100359	0.548734	-0.139805	0.353445	-0.0941349	0.536291	-0.334299	0.0142777
AN7435	AN7435	Ortholog(s) have uracil DNA N-glycosylase activity, role in DNA repair and mitochondrion, nucleus localization	repair	0.122418	0.288175	-0.0270162	0.839017	-0.100796	0.358204	-0.25023	0.0126561
AN2276	AN2276	Has domain(s) with predicted DNA binding, methyltransferase activity, zinc ion binding activity and role in DNA repair, regulation of transcription, DNA-templated	repair	-0.40588	0.0956958	0.191748	0.43316	0.0999635	0.693423	0.697592	0.00138509
AN5112	AN5112	Has domain(s) with predicted endonuclease activity and role in DNA repair	repair	0.0584779	0.721877	0.216066	0.0854503	0.110102	0.423023	0.26769	0.0321383
AN0556	mreA	Putative DNA repair protein; plays a role in the mitotic checkpoint in response to DNA damaging agents; transcript induced in response to DNA damaging agents; required for normal meiosis and ascospore viability	repair	0.240207	0.180964	0.106177	0.555738	0.160631	0.357033	0.0266015	0.900879
AN10523	AN10523	Ortholog(s) have double-stranded DNA binding activity, role in double-strand break repair via homologous recombination and Smc5-Smc6 complex, nucleus localization	repair	0.186763	0.260659	-0.0216401	0.912869	0.100128	0.540519	-0.108275	0.521237
AN10677	AN10677	Ortholog(s) have role in DNA repair, ascospore formation, chromatin silencing at centromere, meiotic gene conversion, reciprocal meiotic recombination, regulation of DNA recombination at centromere	repair	0.128727	0.474361	0.180667	0.253239	0.0511014	0.769931	0.103041	0.55683
AN11893	AN11893	Has domain(s) with predicted role in DNA repair, kinetochore assembly	repair	-0.0770421	0.732733	-0.33148	0.0622999	-0.0701453	0.725563	-0.324583	0.0735656
AN1859	AN1859	Ortholog(s) have role in DNA repair, chromatin remodeling, chromatin silencing at telomere, histone exchange and NuA4 histone acetyltransferase complex, Swr1 complex localization	repair	-0.0827521	0.4966	-0.0897878	0.424871	-0.0393988	0.734475	-0.0464345	0.713487
AN2168	AN2168	Has domain(s) with predicted DNA binding, ubiquitin-protein transferase activity, zinc ion binding activity and role in DNA repair, protein ubiquitination	repair	0.149767	0.442837	0.119463	0.525041	-0.109028	0.553466	-0.139332	0.456392
AN2938	AN2938	Ortholog(s) have 8-oxo-7,8-dihydroguanosine triphosphate pyrophosphatase activity, pyrophosphatase activity, role in DNA repair and peroxisome localization	repair	-0.0137	0.959209	-0.260038	0.187293	-0.098904	0.637522	-0.345242	0.0738051
AN3372	scaA	Putative DNA repair protein with homology to human nibrin; involved in S-phase recovery and G2-M checkpoint; transcript induced in response to DNA damaging agents; also known as campothecin resistance conferring protein rcaA	repair	0.232392	0.106512	0.0575958	0.722875	0.0457938	0.768634	-0.129002	0.387461
AN3797	AN3797	Ortholog(s) have role in cellular response to UV, double-strand break repair via homologous recombination, negative regulation of DNA recombination, postreplication repair, recombinational repair	repair	0.0730401	0.722813	0.0432231	0.835219	0.00578871	0.975362	-0.0240282	0.913826
AN4407	radC	Putative protein with a predicted role in homologous recombination and DNA damage repair; transcript upregulated in response to camptothecin	repair	-0.121576	0.53064	0.0762268	0.689247	-0.135675	0.432211	0.0621273	0.758097
AN4789	uvsI	Protein involved in the response to UV; ortholog of S. cerevisiae Rev3p, a catalytic subunit of DNA polymerase zeta involved in post-replication DNA repair	repair	-0.303955	0.146072	0.110089	0.62358	-0.315837	0.102569	0.0982075	0.675028
AN5620	AN5620	Has domain(s) with predicted DNA-directed DNA polymerase activity, damaged DNA binding activity and role in DNA repair	repair	0.31713	0.0708106	0.174715	0.323686	0.0267509	0.894538	-0.115664	0.542896
AN6728	AN6728	Ortholog(s) have role in cellular response to DNA damage stimulus, double-strand break repair via homologous recombination, reciprocal meiotic recombination, regulation of reciprocal meiotic recombination	repair	-0.0831402	0.825444	0.0570413	0.873439	0.0489233	0.882689	0.189105	0.558758
"Excision repair" genes		NA
AN2446	AN2446	Ortholog(s) have DNA-directed DNA polymerase activity, role in DNA strand elongation involved in DNA replication, DNA synthesis involved in UV-damage excision repair and delta DNA polymerase complex localization	excision repair	-0.297514	0.0187735	-0.402037	0.000438643	0.209783	0.0819273	0.10526	0.454907
AN5114	AN5114	Ortholog(s) have RNA-DNA hybrid ribonuclease activity and role in RNA catabolic process, mismatch repair involved in maintenance of fidelity involved in DNA-dependent DNA replication, ribonucleotide excision repair	excision repair	-0.505425	0.00191527	-1.06108	9.22896e-13	0.245189	0.121946	-0.310469	0.0726427
AN6517	AN6517	Ortholog(s) have role in DNA strand elongation involved in DNA replication, UV-damage excision repair and Elg1 RFC-like complex localization	excision repair	0.349169	0.0285207	-0.353784	0.0191897	0.33734	0.0256515	-0.365613	0.016383
AN2969	AN2969	Ortholog(s) have DNA clamp loader activity, chromatin binding activity	excision repair	0.277682	0.0342262	-0.499741	2.77825e-05	0.20704	0.104989	-0.570384	1.56813e-06
AN4272	AN4272	Ortholog(s) have role in nucleotide-excision repair, pyrimidine dimer repair by nucleotide-excision repair and nucleotide-excision repair complex localization	excision repair	0.295128	0.0105199	0.427501	9.20662e-05	-0.42962	9.56699e-05	-0.297247	0.0071036
AN7103	cshA	Protein with homology to Cockayne's syndrome nucleotide excision repair protein; transcript upregulated in response to camptothecin	excision repair	0.287582	0.00257089	0.832553	5.4887e-20	-0.980419	4.16525e-27	-0.435449	1.03736e-06
AN3890	AN3890	Ortholog(s) have role in mismatch repair, nucleotide-excision repair	excision repair	0.482974	0.000818955	0.944836	1.01217e-11	-0.706581	8.86884e-07	-0.244719	0.0970116
AN2304	AN2304	Ortholog(s) have ubiquitin binding activity, role in cellular response to DNA damage stimulus, negative regulation of protein catabolic process, nucleotide-excision repair and nucleus localization	excision repair	0.442634	0.00021182	0.627691	3.10345e-08	-0.0689846	0.610548	0.116073	0.398488
AN3784	AN3784	Ortholog(s) have damaged DNA binding, zinc ion binding activity	excision repair	1.02439	8.48058e-07	0.864634	4.54393e-06	0.373389	0.0976347	0.213628	0.315129
AN3947	AN3947	Ortholog(s) have 3'-tyrosyl-DNA phosphodiesterase activity, DNA-(apurinic or apyrimidinic site) endonuclease activity, double-stranded DNA 3'-5' exodeoxyribonuclease activity, phosphoric diester hydrolase activity	excision repair	0.306134	0.0275026	-0.086728	0.574842	0.0286103	0.860171	-0.364252	0.00498673
AN10443	AN10443	Has domain(s) with predicted catalytic activity and role in DNA repair, base-excision repair	excision repair	0.367702	0.0265007	-0.0816274	0.666096	0.153166	0.37359	-0.296163	0.0680062
AN6682	AN6682	Ortholog(s) have oxidized purine nucleobase lesion DNA N-glycosylase activity and role in DNA repair, base-excision repair, AP site formation, error-free translesion synthesis, telomere maintenance via telomerase	excision repair	0.066837	0.784172	-0.764243	7.00913e-06	0.460977	0.00866315	-0.370102	0.0496292
AN8064	AN8064	Ortholog(s) have ATPase activity, DNA clamp loader activity and role in DNA strand elongation involved in DNA replication, UV-damage excision repair, leading strand elongation	excision repair	0.123344	0.491697	-0.415797	0.00297881	0.410135	0.0039012	-0.129006	0.444364
AN0044	AN0044	Ortholog(s) have ubiquitin protein ligase activity, role in DNA repair, nucleotide-excision repair, postreplication repair, protein ubiquitination and site of double-strand break localization	excision repair	-0.0929302	0.712165	-0.660848	0.000508321	0.0583301	0.797305	-0.509588	0.0103534
AN6300	AN6300	Ortholog(s) have role in DNA strand elongation involved in DNA replication, UV-damage excision repair and Elg1 RFC-like complex localization	excision repair	0.166432	0.348805	-0.36554	0.0157886	0.174429	0.282138	-0.357542	0.0202252
AN7325	AN7325	Ortholog(s) have DNA-directed DNA polymerase activity and role in DNA strand elongation involved in DNA replication, DNA synthesis involved in UV-damage excision repair, mitotic DNA replication lagging strand elongation	excision repair	-0.08267	0.603031	-0.433519	0.000448196	-0.0824451	0.559306	-0.433294	0.000512612
AN11961	AN11961	Ortholog(s) have role in nucleotide-excision repair, phosphorylation of RNA polymerase II C-terminal domain, transcription by RNA polymerase II	excision repair	-0.038959	0.821086	0.289629	0.0213287	-0.173955	0.187551	0.154633	0.262681
AN5216	AN5216	Ortholog(s) have role in interstrand cross-link repair, nucleotide-excision repair, nucleotide-excision repair involved in interstrand cross-link repair	excision repair	0.326451	0.0732673	0.554359	0.000702644	-0.132342	0.487392	0.0955657	0.637697
AN0604	AN0604	Ortholog(s) have role in nucleotide-excision repair, pyrimidine dimer repair by nucleotide-excision repair, response to UV	excision repair	-0.234764	0.230711	-0.286082	0.132399	-0.794258	2.1323e-06	-0.845575	6.54163e-07
AN4271	AN4271	Ortholog(s) have role in nucleotide-excision repair and nucleotide-excision repair complex localization	excision repair	0.25956	0.132772	-0.225571	0.196109	-0.43478	0.00590917	-0.919911	9.76401e-10
AN10840	AN10840	Has domain(s) with predicted DNA binding, catalytic activity and role in DNA repair, base-excision repair	excision repair	-0.42495	0.290918	0.0940441	0.856807	-1.13359	0.00171289	-0.614599	0.117942
AN8702	AN8702	Ortholog(s) have ubiquitin conjugating enzyme activity, ubiquitin protein ligase activity, ubiquitin-protein transferase activity	excision repair	-0.141223	0.373115	0.041168	0.811959	0.510669	7.20982e-05	0.69306	5.25565e-08
AN12233	AN12233	Ortholog(s) have ubiquitin-protein transferase activity and role in global genome nucleotide-excision repair, ubiquitin-dependent protein catabolic process	excision repair	-0.134981	0.570358	0.240728	0.229726	0.397119	0.0364011	0.772829	2.14194e-05
AN1668	AN1668	Ortholog(s) have role in nucleotide-excision repair, phosphorylation of RNA polymerase II C-terminal domain, transcription by RNA polymerase II and transcription factor TFIIH holo complex, transcription factor TFIIK complex localization	excision repair	0.0980451	0.62375	-0.107692	0.530672	0.494531	0.000958623	0.288794	0.0676026
AN5751	AN5751	Ortholog(s) have ATP-dependent polydeoxyribonucleotide 5'-hydroxyl-kinase activity, polynucleotide 3'-phosphatase activity and role in DNA 3' dephosphorylation involved in DNA repair, base-excision repair, single strand break repair	excision repair	0.291619	0.12847	-0.289422	0.108774	0.185903	0.323398	-0.395139	0.0246097
AN6186	AN6186	Ortholog(s) have role in mismatch repair, nucleotide-excision repair	excision repair	-0.130306	0.528103	0.0702003	0.722331	0.153939	0.39141	0.354446	0.0335366
AN5235	AN5235	Ortholog(s) have role in transcription-coupled nucleotide-excision repair and Ddb1-Ckn1 complex localization	excision repair	0.116181	0.569087	0.18553	0.288941	0.0686517	0.717694	0.138	0.461331
Whole gene set
number of genes in the group:			82
up-regulated genes in the group:				16		15		22		14
down-regulated genes in the group:				13		29		12		24
stress responsive/AtfA-dependent genes in the group:				29		44		34		38
number of the studied genes:			10748
up-regulated genes (total):				1875		2482		2840		2487
down-regulated genes (total):				1985		2514		2643		2386
stress responsive genes (total):				3860		4996		5483		4873
p-value for up-regulated genes (Fisher's exact test):				0.3534		0.8805		0.509		0.9291
p-value for down-regulated genes (Fisher's exact test):				0.7711		0.009356		0.9904		0.08185
p-value for stress responsive/AtfA-dependent genes (Fisher's exact test):				0.5827		0.1158		0.9679		0.4701
"Excision repair" genes
number of genes in the group:			27
up-regulated genes in the group:				9		7		6		3
down-regulated genes in the group:				2		9		6		12
stress responsive/AtfA-dependent genes in the group:				11		16		12		15
number of the studied genes:			10748
up-regulated genes (total):				1875		2482		2840		2487
down-regulated genes (total):				1985		2514		2643		2386
stress responsive genes (total):				3860		4996		5483		4873
p-value for up-regulated genes (Fisher's exact test):				0.0343		0.4358		0.7567		0.9666
p-value for down-regulated genes (Fisher's exact test):				0.9714		0.1593		0.6842		0.008302
p-value for stress responsive/AtfA-dependent genes (Fisher's exact test):				0.3674		0.1273		0.8095		0.1908

## Sheet: Secondary metabolism
Supplementary Table S5 RNAseq data and the results of enrichment analyses of the studied gene groups
Sheet 6 - Secondary metabolite cluster genes
					reference strain, Cd treated vs.	DatfA mutant, Cd treated vs.	DatfA mutant, untreated vs.	DatfA mutant, Cd treated vs.
					reference strain, untreated	DatfA mutant, untreated	reference strain, untreated	reference strain, Cd treated
Cluster genes
number of secondary metaboliste cluster genes:				461
up-regulated secondary metabolite cluster genes:					58	100	53	71
down-regulated secondary metabolite cluster genes:					47	39	119	98
number of the studied genes:				10748
up-regulated genes (total):					1875	2482	2840	2487
down-regulated genes (total):					1985	2514	2643	2386
p-value for up-regulated genes (Fisher's exact test):					0.9986	0.783	1	1
p-value for down-regulated genes (Fisher's exact test):					1	1	0.2831	0.708
Key genes
number of secondary metaboliste cluster key genes:				105
up-regulated secondary metabolite cluster key genes:					15	25	14	13
down-regulated secondary metabolite cluster key genes:					9	6	38	28
number of the studied genes:				10748
up-regulated genes (total):					1875	2482	2840	2487
down-regulated genes (total):					1985	2514	2643	2386
p-value for up-regulated genes (Fisher's exact test):					0.8381	0.4684	0.9996	0.9983
p-value for down-regulated genes (Fisher's exact test):					0.9986	1	0.00511	0.1611
number of secondary metabolite gene clusters				62
number of up-regulated clusters					1	3	3	4
number of down-regulated clusters					2	1	9	6
Secondary metabolite cluster genes
GENE ID	Gene name	Feature (AspGD)	Cluster	Key gene	log2FC	adj. p-value	log2FC	adj. p-value	log2FC	adj. p-value	log2FC	adj. p-value
					reference strain, Cd treated vs.	reference strain, untreated	DatfA mutant, Cd treated vs.	DatfA mutant, untreated	DatfA mutant, untreated vs.	reference strain, untreated	DatfA mutant, Cd treated vs.	reference strain, Cd treated
AN6451	AN6451	Predicted transmembrane transporter; coregulated with the PKS pkbA/AN6448; predicted secondary metabolism gene cluster member	pkb cluster		1.34283	0.0277418	1.25791	0.111934	-1.47499	0.0557825	-1.55991	0.00636692
AN6450	AN6450	Tetrahydroxynaphthalene reductase; role in melanin biosynthesis;; coregulated with the PKS pkbA/AN6448; predicted secondary metabolism gene cluster member	pkb cluster		1.59258	0.0107868	0.743134	0.334651	-0.744004	0.3348	-1.59344	0.00607098
AN6449	CYP5077A1	Putative cytochrome P450; coregulated with the PKS pkbA/AN6448; encoded within the cichorine gene cluster	pkb cluster		1.07648	NA	-1.01279	0.673377	-1.80578	0.295981	-3.89506	0.022441
AN11922	cicG	Protein of unknown function; encoded within the cichorine gene cluster	pkb cluster		NA	NA	NA	NA	NA	NA	NA	NA
AN6448	pkbA	Putative polyketide synthase; involved in cichorine production; predicted backbone enzyme of a secondary metabolism gene cluster member	pkb cluster	PKS	1.65561	0.0105837	0.533641	0.525041	-0.741493	0.346542	-1.86346	0.00233467
AN6447	cicE	Predicted O-methyltransferase; coregulated with the PKS pkbA/AN6448; encoded within the cichorine gene cluster	pkb cluster		0.498954	0.695434	-3.29981	0.0608664	-1.79498	0.138656	-5.59375	0.000320465
AN6446	cicD	Predicted transcription factor; coregulated with the NRPS/AN6444; encoded within the cichorine gene cluster; possible transcriptional regulator of cluster	pkb cluster	TF	2.50294	NA	-1.96461	NA	0.632304	NA	-3.83525	0.0815078
AN6445	cicC	Putative aryl-alcohol oxidase-related protein; coregulated with the NRPS/AN6444; encoded within the cichorine gene cluster	pkb cluster		0.433947	NA	-0.258823	0.874611	1.94238	0.24306	1.24961	0.454484
AN6444	cicB	Putative nonribosomal peptide synthase (NRPS)-like enzyme; encoded within the cichorine gene cluster	pkb cluster	NRPS	0.597005	NA	1.03674	0.416882	-0.247681	0.868861	0.192057	0.89436
number of genes in the cluster:				9
up-regulated genes in the cluster:					3		0		0		0
down-regulated genes in the cluster:					0		0		0		5
number of the studied genes:				10748
up-regulated genes (total):					1875		2482		2840		2487
down-regulated genes (total):					1985		2514		2643		2386
p-value for up-regulated genes (Fisher's exact test):					0.1968		1		1		1
p-value for down-regulated genes (Fisher's exact test):					1		1		1		0.03019
GENE ID	Gene name	Feature (AspGD)	Cluster	Key gene	log2FC	adj. p-value	log2FC	adj. p-value	log2FC	adj. p-value	log2FC	adj. p-value
					reference strain, Cd treated vs.	reference strain, untreated	DatfA mutant, Cd treated vs.	DatfA mutant, untreated	DatfA mutant, untreated vs.	reference strain, untreated	DatfA mutant, Cd treated vs.	reference strain, Cd treated
AN6437	AN6437	Ortholog of Aspergillus versicolor : Aspve1_0052718 and Aspergillus sydowii : Aspsy1_0031878	AN6431 cluster		-0.328079	0.0909473	-0.352047	0.0176786	1.73801	4.09657e-31	1.71404	3.12284e-29
AN6436	AN6436	Has domain(s) with predicted ATP binding, ATPase activity, ATPase-coupled transmembrane transporter activity, nucleoside-triphosphatase activity, nucleotide binding activity and role in transmembrane transport	AN6431 cluster		0.333014	0.492375	0.818328	0.0082285	1.09206	0.00303873	1.57737	1.06996e-06
AN6435	AN6435	Has domain(s) with predicted integral component of membrane localization	AN6431 cluster		0	NA	-1.97093	NA	1.6004	NA	0	NA
AN6434	CYP672A1	Putative cytochrome P450	AN6431 cluster		0.465525	0.290645	-0.0723083	0.899518	-0.546413	0.205602	-1.08425	0.00593968
AN6433	AN6433	Has domain(s) with predicted transferase activity, transferring hexosyl groups activity and role in metabolic process	AN6431 cluster		0.640887	0.121143	0.772815	0.0751225	-0.948344	0.025041	-0.816416	0.032608
AN10816	AN10816	Ortholog of A. fumigatus Af293 : Afu8g05030, A. oryzae RIB40 : AO090003001446, AO090009000107, Aspergillus versicolor : Aspve1_0130291 and Aspergillus clavatus NRRL 1 : ACLA_058430	AN6431 cluster		0.609162	7.50193e-05	0.754917	4.7842e-07	-0.465021	0.00318981	-0.319265	0.0401829
AN6432	AN6432	Protein of unknown function; has domain(s) with predicted nucleotide binding activity; coregulated with the PKS AN6431; predicted secondary metabolism gene cluster member	AN6431 cluster		-0.155678	0.852942	0.823607	0.365441	-2.26103	0.00246196	-1.28174	0.0666299
AN6431	AN6431	Putative polyketide synthase; predicted backbone enzyme of a secondary metabolism gene cluster member; coregulated with AN6432	AN6431 cluster	PKS	-0.25712	0.426761	0.47023	0.370165	-3.25963	4.02348e-18	-2.53228	6.53692e-14
number of genes in the cluster:				8
up-regulated genes in the cluster:					1		2		2		2
down-regulated genes in the cluster:					0		1		4		4
number of the studied genes:				10748
up-regulated genes (total):					1875		2482		2840		2487
down-regulated genes (total):					1985		2514		2643		2386
p-value for up-regulated genes (Fisher's exact test):					0.7844		0.5837		0.6675		0.5849
p-value for down-regulated genes (Fisher's exact test):					1		0.8814		0.1081		0.07863
GENE ID	Gene name	Feature (AspGD)	Cluster	Key gene	log2FC	adj. p-value	log2FC	adj. p-value	log2FC	adj. p-value	log2FC	adj. p-value
					reference strain, Cd treated vs.	reference strain, untreated	DatfA mutant, Cd treated vs.	DatfA mutant, untreated	DatfA mutant, untreated vs.	reference strain, untreated	DatfA mutant, Cd treated vs.	reference strain, Cd treated
AN6236	sidD	Nonribosomal peptide synthetase (NRPS); predicted backbone enzyme of a siderophore secondary metabolism biosynthetic gene cluster member	AN6236 cluster	NRPS	-0.701467	0.00133242	-0.772803	0.000120721	1.06735	7.34049e-08	0.996018	1.21483e-06
AN6235	sidH	Triacetylfusarinine C (TAFC) biosynthetic enoyl-CoA hydratase; siderophore biosynthetic enzyme	AN6236 cluster		0.0270385	0.948695	0.187856	0.453073	1.95023	1.07285e-15	2.11105	2.17973e-19
AN6234	sidF	Predicted triacetylfusarinine C (TAFC) biosynthetic transacylase; siderophore biosynthetic protein; predicted secondary metabolism gene cluster member	AN6236 cluster		0.00229851	0.995359	0.137735	0.572751	1.22924	7.00641e-09	1.36467	5.20155e-11
number of genes in the cluster:				3
up-regulated genes in the cluster:					0		0		3		3
down-regulated genes in the cluster:					1		1		0		0
number of the studied genes:				10748
up-regulated genes (total):					1875		2482		2840		2487
down-regulated genes (total):					1985		2514		2643		2386
p-value for up-regulated genes (Fisher's exact test):					1		1		0.01843		0.01238
p-value for down-regulated genes (Fisher's exact test):					0.4581		0.5504		1		1
GENE ID	Gene name	Feature (AspGD)	Cluster	Key gene	log2FC	adj. p-value	log2FC	adj. p-value	log2FC	adj. p-value	log2FC	adj. p-value
					reference strain, Cd treated vs.	reference strain, untreated	DatfA mutant, Cd treated vs.	DatfA mutant, untreated	DatfA mutant, untreated vs.	reference strain, untreated	DatfA mutant, Cd treated vs.	reference strain, Cd treated
AN6002	aptC	Putative monooxygenase; asperthecin (apt) gene cluster member required for asperthecin biosynthesis	Asperthecin (apt) cluster		-0.156064	0.711206	-0.0224532	0.961448	0.21258	0.549542	0.346191	0.332041
AN6001	aptB	Putative hydrolase; asperthecin (apt) gene cluster member required for asperthecin biosynthesis; transcript repressed by nitrate	Asperthecin (apt) cluster		1.2113	0.00554835	1.56354	0.00177356	-1.2787	0.0149091	-0.92646	0.0230752
AN6000	aptA	Polyketide synthase; asperthecin (apt) gene cluster member required for asperthecin biosynthesis; contains ketosynthase, acyltransferase, and acyl carrier protein domains	Asperthecin (apt) cluster	PKS	0.647188	0.00794301	1.05941	0.000186655	-1.56325	1.00412e-08	-1.15103	5.20675e-07
number of genes in the cluster:				3
up-regulated genes in the cluster:					2		2		0		0
down-regulated genes in the cluster:					0		0		2		2
number of the studied genes:				10748
up-regulated genes (total):					1875		2482		2840		2487
down-regulated genes (total):					1985		2514		2643		2386
p-value for up-regulated genes (Fisher's exact test):					0.08066		0.1353		1		1
p-value for down-regulated genes (Fisher's exact test):					1		1		0.1516		0.1259
GENE ID	Gene name	Feature (AspGD)	Cluster	Key gene	log2FC	adj. p-value	log2FC	adj. p-value	log2FC	adj. p-value	log2FC	adj. p-value
					reference strain, Cd treated vs.	reference strain, untreated	DatfA mutant, Cd treated vs.	DatfA mutant, untreated	DatfA mutant, untreated vs.	reference strain, untreated	DatfA mutant, Cd treated vs.	reference strain, Cd treated
AN6784	xptA	Dimethyl-allyl-tryptophan synthase (DMATS) type aromatic prenyltransferase; required for xanthone (shamixanthone and epishamixanthone) and variecoxanthone biosynthesis; upregulated in nitrogen-limited continuous culture	xptA-containing cluster	DMATS type aromatic prenyltransferase	1.7049	NA	0.52998	0.777821	1.99021	0.325637	0.815286	0.664204
AN6785	AN6785	Ortholog of A. fumigatus Af293 : Afu7g06760, Neosartorya fischeri NRRL 181 : NFIA_028050, Aspergillus versicolor : Aspve1_0046596 and Aspergillus fumigatus A1163 : AFUB_092340	xptA-containing cluster		-0.431187	0.226594	0.269815	0.30081	1.6484	2.25983e-10	2.3494	2.99719e-19
AN11527	AN11527	Protein of unknown function	xptA-containing cluster		0	NA	-0.153636	NA	1.63444	NA	1.68453	NA
AN6786	AN6786	Putative beta-1,4-endoglucanase	xptA-containing cluster		-0.254229	0.478529	1.03286	4.76761e-11	2.64863	1.02722e-32	3.93571	1.30772e-72
AN6787	CYP682C1	Putative cytochrome P450	xptA-containing cluster. AN6791 cluster		-0.246005	0.328566	-0.807296	2.52144e-07	5.68991	8.547e-236	5.12862	1.5625e-189
AN6788	AN6788	Putative transcription factor; predicted role in secondary metabolite production	xptA-containing cluster. AN6791 cluster	TF	-0.100295	0.912586	-1.0028	0.0210105	2.62697	4.06703e-07	1.72447	0.00169974
AN6789	AN6789	Protein of unknown function	xptA-containing cluster. AN6791 cluster		-0.323781	0.0856532	0.0531804	0.806662	0.993815	6.16029e-10	1.37078	7.6541e-18
AN6790	AN6790	Putative transcription factor; predicted role in secondary metabolite production	xptA-containing cluster. AN6791 cluster	TF	0.89996	7.13112e-10	0.634389	4.13123e-06	0.485084	0.00112866	0.219513	0.150281
AN11907	AN11907	Protein of unknown function	xptA-containing cluster. AN6791 cluster		-0.61349	0.399097	0.0383254	0.938917	2.18417	1.63881e-06	2.83598	9.36491e-09
AN6791	AN6791	Putative polyketide synthase	xptA-containing cluster. AN6791 cluster	PKS	-0.377058	0.246122	-0.376584	0.122475	1.22598	4.65623e-07	1.22645	1.40337e-06
number of genes in the cluster:				10
up-regulated genes in the cluster:					1		2		8		7
down-regulated genes in the cluster:					0		2		0		0
number of the studied genes:				10748
up-regulated genes (total):					1875		2482		2840		2487
down-regulated genes (total):					1985		2514		2643		2386
p-value for up-regulated genes (Fisher's exact test):					0.8531		0.7104		0.000623		0.002158
p-value for down-regulated genes (Fisher's exact test):					1		0.7179		1		1
GENE ID	Gene name	Feature (AspGD)	Cluster	Key gene	log2FC	adj. p-value	log2FC	adj. p-value	log2FC	adj. p-value	log2FC	adj. p-value
					reference strain, Cd treated vs.	reference strain, untreated	DatfA mutant, Cd treated vs.	DatfA mutant, untreated	DatfA mutant, untreated vs.	reference strain, untreated	DatfA mutant, Cd treated vs.	reference strain, Cd treated
AN7872	AN7872	Predicted transcription factor; predicted secondary metabolism gene cluster member	AN7884 cluster	TF	0.546217	0.00102859	0.669859	9.99077e-06	0.31267	0.0628711	0.436312	0.00552405
AN11582	AN11582	Protein of unknown function	AN7884 cluster		0	NA	0.857614	NA	0	NA	0.794975	NA
AN7873	AN7873	Putative multifunctional enzyme with a predicted role in cytosolic fatty acid formation; predicted secondary metabolism gene cluster member	AN7884 cluster		-0.0789399	0.701923	0.674602	5.33703e-07	0.729401	4.48586e-07	1.48294	1.54766e-27
AN7875	AN7875	Protein of unknown function; predicted secondary metabolism gene cluster member	AN7884 cluster		2.2209	NA	0.903289	0.536828	0.137984	0.937615	-1.17963	0.313351
AN7874	AN7874	Protein of unknown function; predicted secondary metabolism gene cluster member	AN7884 cluster		0.727764	0.264878	2.64168	1.35274e-06	-0.527706	0.404869	1.38621	0.015862
AN7876	AN7876	Putative branched chain amino acid aminotransferase with a predicted role in branched chain amino acid biosynthesis; predicted secondary metabolism gene cluster member	AN7884 cluster		-1.66995	0.0974895	-1.80054	0.047054	0.159366	0.864899	0.0287785	0.984618
AN7877	AN7877	RTA-like protein; predicted secondary metabolism gene cluster member	AN7884 cluster		-1.10558	1.01802e-13	-0.43859	0.00413275	-0.117151	0.492009	0.549837	0.000329017
AN7878	AN7878	Putative branched chain amino acid aminotransferase with a predicted role in valine, leucine, and isoleucine metabolism; predicted secondary metabolism gene cluster member	AN7884 cluster		-0.477473	0.0636532	0.0416368	0.902484	-0.680482	0.00430928	-0.161372	0.588129
AN7879	AN7879	Predicted ABC transporter; predicted secondary metabolism gene cluster member	AN7884 cluster		0.278526	0.604713	0.872976	0.0395543	-0.271186	0.586874	0.323263	0.492772
AN7880	AN7880	Putative fatty-acyl-CoA synthase with a predicted role in cytosolic fatty acid formation; predicted secondary metabolism gene cluster member	AN7884 cluster		-1.27127	0.006794	0.811079	0.0769627	-1.0705	0.0152004	1.01184	0.0299893
AN7881	CYP548C1	Putative cytochrome P450; predicted secondary metabolism gene cluster member	AN7884 cluster		1.43476	2.07327e-06	2.24297	2.91156e-13	-0.713721	0.0559227	0.0944927	0.777538
AN11028	AN11028	Predicted nucleotide binding protein with oxidoreductase activity and a role in oxidation-reduction; predicted secondary metabolism gene cluster member	AN7884 cluster		-1.06491	0.215155	-0.363693	0.721678	-1.06823	0.177153	-0.367017	0.727466
AN11031	AN11031	Predicted transmembrane transporter; predicted secondary metabolism gene cluster member	AN7884 cluster		1.95738	NA	2.74739	NA	-1.22814	NA	-0.438121	0.88392
AN7883	AN7883	Protein of unknown function; predicted secondary metabolism gene cluster member	AN7884 cluster		0.195677	NA	4.1114	0.00798433	-2.74405	0.104989	1.17168	0.302844
AN7884	AN7884	Putative nonribosomal peptide synthase (NRPS) similar to ferrichrome peptide synthetases involved in siderophore biosynthesis; predicted backbone enzyme of a secondary metabolism gene cluster member	AN7884 cluster	NRPS	0.26891	0.198455	0.685039	0.000340683	-0.80415	2.39041e-05	-0.388021	0.040973
number of genes in the cluster:				15
up-regulated genes in the cluster:					1		7		1		5
down-regulated genes in the cluster:					2		2		3		1
number of the studied genes:				10748
up-regulated genes (total):					1875		2482		2840		2487
down-regulated genes (total):					1985		2514		2643		2386
p-value for up-regulated genes (Fisher's exact test):					0.9437		0.03809		0.99		0.2537
p-value for down-regulated genes (Fisher's exact test):					0.7946		0.8976		0.7529		0.9769
GENE ID	Gene name	Feature (AspGD)	Cluster	Key gene	log2FC	adj. p-value	log2FC	adj. p-value	log2FC	adj. p-value	log2FC	adj. p-value
					reference strain, Cd treated vs.	reference strain, untreated	DatfA mutant, Cd treated vs.	DatfA mutant, untreated	DatfA mutant, untreated vs.	reference strain, untreated	DatfA mutant, Cd treated vs.	reference strain, Cd treated
AN7896	dbaA	Zn(II)2Cys6 transcription factor with a role in secondary metabolite biosynthesis; member of the dba gene cluster; overexpression upregulates dba gene cluster expression; dba cluster expression is coregulated	Derivative of Benzaldehyde1 (dba) and F9775 hybrid cluster 1	TF	-0.783024	0.00491202	-0.134467	0.801315	-2.81824	1.16622e-18	-2.16969	7.60162e-11
AN7897	dbaB	FAD-binding monooxygenase with a role in secondary metabolism; member of the dba gene cluster; dba cluster expression is coregulated	Derivative of Benzaldehyde1 (dba) and F9775 hybrid cluster 1		0.660409	0.669525	-1.57271	0.186745	1.5879	0.189247	-0.645213	0.654521
AN11584	dbaC	YCII domain protein with a role in secondary metabolism; member of the dba gene cluster; dba cluster expression is coregulated	Derivative of Benzaldehyde1 (dba) and F9775 hybrid cluster 1		-1.92842	0.218336	-2.93289	0.0429646	0.493777	0.730579	-0.51069	0.803338
AN7898	dbaD	Major facilitator superfamily (MFS) transporter with a role in secondary metabolism; member of the dba gene cluster; dba cluster expression is coregulated	Derivative of Benzaldehyde1 (dba) and F9775 hybrid cluster 1		0.226772	0.844894	0.58193	0.567101	-0.554901	0.576676	-0.199743	0.85562
AN7899	dbaE	Putative esterase/lipase with a role in secondary metabolism; member of the dba gene cluster	Derivative of Benzaldehyde1 (dba) and F9775 hybrid cluster 1		0.175263	0.852574	0.213225	0.774991	0.701053	0.317018	0.739015	0.280807
AN7900	dbaF	Putative oxidoreductase with a role in secondary metabolism; member of the dba gene cluster; dba cluster expression is coregulated	Derivative of Benzaldehyde1 (dba) and F9775 hybrid cluster 1		-1.76998	0.0616921	-0.461213	0.660858	-0.9268	0.282364	0.381971	0.753416
AN7901	dbaG	Putative fungal transcription factor (no conserved domain); member of the dba gene cluster; dba cluster expression is coregulated	Derivative of Benzaldehyde1 (dba) and F9775 hybrid cluster 1	TF	-1.09748	0.174439	1.65074	0.201882	-3.91978	0.0003055	-1.17155	0.204604
AN7902	dbaH	FAD-binding monooxygenase with a role in secondary metabolism; member of the dba gene cluster; dba cluster expression is coregulated	Derivative of Benzaldehyde1 (dba) and F9775 hybrid cluster 1		0.190044	0.887983	-3.0226	0.00349197	1.53066	0.0983472	-1.68199	0.155429
AN7903	pkeA	Polyketide synthase; involved in orsellinic acid and violaceol production; member of the dba gene cluster; dba cluster expression is coregulated	Derivative of Benzaldehyde1 (dba) and F9775 hybrid cluster 1	PKS	0.149976	0.925041	-1.66373	0.152169	1.18186	0.310449	-0.631845	0.654201
number of genes in the cluster:				9
up-regulated genes in the cluster:					0		0		0		0
down-regulated genes in the cluster:					1		2		2		1
number of the studied genes:				10748
up-regulated genes (total):					1875		2482		2840		2487
down-regulated genes (total):					1985		2514		2643		2386
p-value for up-regulated genes (Fisher's exact test):					1		1		1		1
p-value for down-regulated genes (Fisher's exact test):					0.8409		0.6594		0.6898		0.8957
GENE ID	Gene name	Feature (AspGD)	Cluster	Key gene	log2FC	adj. p-value	log2FC	adj. p-value	log2FC	adj. p-value	log2FC	adj. p-value
					reference strain, Cd treated vs.	reference strain, untreated	DatfA mutant, Cd treated vs.	DatfA mutant, untreated	DatfA mutant, untreated vs.	reference strain, untreated	DatfA mutant, Cd treated vs.	reference strain, Cd treated
AN7907	AN7907	Putative glyoxylate-bleomycin resistance protein; member of the F9775 secondary metabolite gene cluster	Derivative of Benzaldehyde1 (dba) and F9775 hybrid cluster 2		-0.0385756	0.961516	0.739603	0.218941	-0.612616	0.321466	0.165563	0.816319
AN7908	axhA	Protein with alpha-arabinofuranosidase activity, involved in degradation of pectin; member of the F9775 secondary metabolite gene cluster	Derivative of Benzaldehyde1 (dba) and F9775 hybrid cluster 2		2.5125	0.0820094	4.45762	2.27741e-05	0.342258	0.857338	2.28738	0.00164536
AN7909	orsA	Polyketide synthase; member of the F9775 secondary metabolite gene cluster; required for F9775 and orsellinic acid and violaceol biosynthesis	Derivative of Benzaldehyde1 (dba) and F9775 hybrid cluster 2	PKS	0.840941	0.609947	-0.250134	0.88518	2.07522	0.121785	0.984146	0.523065
AN12004	AN12004	Ortholog of Aspergillus brasiliensis : Aspbr1_0136489, Aspbr1_0206584, Aspergillus versicolor : Aspve1_0054872, Aspve1_0526796 and Aspergillus sydowii : Aspsy1_0042235, Aspsy1_0157426	Derivative of Benzaldehyde1 (dba) and F9775 hybrid cluster 2		1.30995	0.0493565	-0.156216	0.852522	0.28681	0.700479	-1.17936	0.063559
AN7911	orsB	Putative amidohydrolase; member of the F9775 secondary metabolite gene cluster	Derivative of Benzaldehyde1 (dba) and F9775 hybrid cluster 2		0.228598	0.854413	0.0611458	0.960997	1.14382	0.214564	0.976367	0.310624
AN7912	orsC	Putative tyrosinase; member of the F9775 secondary metabolite gene cluster	Derivative of Benzaldehyde1 (dba) and F9775 hybrid cluster 2		0.368423	0.754921	0.108474	0.929763	0.869202	0.368208	0.609253	0.568716
AN7914	AN7914	Putative alcohol dehydrogenase; member of the F9775 secondary metabolite gene cluster; induced by rapamycin-induced autophagy	Derivative of Benzaldehyde1 (dba) and F9775 hybrid cluster 2		-0.200159	0.881914	-1.24223	0.2345	0.899979	0.393702	-0.142094	0.918311
AN7913	AN7913	Protein of unknown function; member of the F9775 secondary metabolite gene cluster	Derivative of Benzaldehyde1 (dba) and F9775 hybrid cluster 2		-0.0378379	0.920327	0.432859	0.123611	-0.013144	0.968247	0.457553	0.106514
AN7915	bglD	Putative glucosidase; member of the F9775 secondary metabolite gene cluster	Derivative of Benzaldehyde1 (dba) and F9775 hybrid cluster 2		-0.098718	0.687836	0.646897	0.00202272	-1.90473	2.01399e-23	-1.15911	4.3379e-10
AN7916	AN7916	Putative amino acid transporter; adjacent to the F9775 secondary metabolite gene cluster	Derivative of Benzaldehyde1 (dba) and F9775 hybrid cluster 2		0.970777	0.0536925	1.36639	0.0103468	-1.00133	0.0792946	-0.605718	0.208564
number of genes in the cluster:				10
up-regulated genes in the cluster:					1		3		0		1
down-regulated genes in the cluster:					0		0		1		1
number of the studied genes:				10748
up-regulated genes (total):					1875		2482		2840		2487
down-regulated genes (total):					1985		2514		2643		2386
p-value for up-regulated genes (Fisher's exact test):					0.8531		0.4166		1		0.9281
p-value for down-regulated genes (Fisher's exact test):					1		1		0.9406		0.9188
GENE ID	Gene name	Feature (AspGD)	Cluster	Key gene	log2FC	adj. p-value	log2FC	adj. p-value	log2FC	adj. p-value	log2FC	adj. p-value
					reference strain, Cd treated vs.	reference strain, untreated	DatfA mutant, Cd treated vs.	DatfA mutant, untreated	DatfA mutant, untreated vs.	reference strain, untreated	DatfA mutant, Cd treated vs.	reference strain, Cd treated
AN7999	AN7999	Has domain(s) with predicted oxidoreductase activity and role in metabolic process	xptB-containing cluster		-0.178538	0.69067	0.31196	0.543772	-1.68917	1.41872e-05	-1.19867	0.0016418
AN12402	xptB	Prenyltransferase; deletion leads to the elimination of the prenyl xanthones, shamixanthone and epishamixanthone, and the accumulation of several metabolites including a monodictyphenone derivative	xptB-containing cluster	Prenyltransferase	-0.144349	0.718048	-0.231005	0.536518	-0.454514	0.161725	-0.541171	0.104486
AN9467	parA	Putative regulatory subunit of protein phosphatase 2A (PP2A)	xptB-containing cluster		0.0406466	0.734357	-0.118058	0.226588	0.152084	0.104912	-0.00662125	0.959504
AN12431	AN12431	Protein of unknown function	xptB-containing cluster (AN12431)		-0.721089	0.0132341	-0.595676	0.0616804	-0.990569	0.000314346	-0.865156	0.00460065
number of genes in the cluster:				4
up-regulated genes in the cluster:					0		0		0		0
down-regulated genes in the cluster:					1		0		2		2
number of the studied genes:				10748
up-regulated genes (total):					1875		2482		2840		2487
down-regulated genes (total):					1985		2514		2643		2386
p-value for up-regulated genes (Fisher's exact test):					1		1		1		1
p-value for down-regulated genes (Fisher's exact test):					0.5582		1		0.2548		0.2154
GENE ID	Gene name	Feature (AspGD)	Cluster	Key gene	log2FC	adj. p-value	log2FC	adj. p-value	log2FC	adj. p-value	log2FC	adj. p-value
					reference strain, Cd treated vs.	reference strain, untreated	DatfA mutant, Cd treated vs.	DatfA mutant, untreated	DatfA mutant, untreated vs.	reference strain, untreated	DatfA mutant, Cd treated vs.	reference strain, Cd treated
AN8105	AN8105	Putative nonribosomal peptide synthase (NRPS)-like enzyme; predicted secondary metabolism gene cluster member	AN8105 cluster	NRPS	0	NA	-1.06596	NA	0.695431	NA	0	NA
AN8106	AN8106	Predicted dioxygenase; role in secondary metabolite biosynthesis; predicted secondary metabolism gene cluster member	AN8105 cluster		-0.000937161	NA	0	1	-4.62822	0.00527541	-4.73145	0.00495739
AN11037	AN11037	Predicted transmembrane transporter; predicted secondary metabolism gene cluster member	AN8105 cluster		-1.16547	NA	0.857614	NA	-1.22811	NA	0.794975	NA
AN11049	AN11049	NmrA-like domain containing protein; predicted secondary metabolism gene cluster member	AN8105 cluster		1.17779	NA	-1.06597	NA	-0.266339	NA	-2.5101	0.544629
AN11941	AN11941	Putative L-iditol 2-dehydrogenase with a predicted role in mannose/mannitol, fructose, and sorbose/sorbitol metabolism	AN8105 cluster		-1.1655	NA	-0.821902	NA	1.94063	NA	2.28423	0.433539
AN8108	AN8108	Predicted fumarylacetoacetase; predicted secondary metabolism gene cluster member	AN8105 cluster		0.198028	NA	3.33479	NA	-2.70714	NA	0.429622	0.83661
AN11942	AN11942	Ortholog(s) have ATPase activity	AN8105 cluster		0	NA	0.857614	NA	0	NA	0.794975	NA
AN8110	AN8110	Putative short-chain dehydrogenase/reductase family protein; predicted secondary metabolism gene cluster member	AN8105 cluster		-0.0326283	0.969528	2.14336	0.000754171	-1.31049	0.0612677	0.865502	0.147364
AN8111	AN8111	Putative Zn(II)2Cys6 transcription factor; predicted role in secondary metabolite production; predicted secondary metabolism gene cluster member	AN8105 cluster	TF	0.819325	0.154112	1.63587	0.00338826	-1.12	0.059881	-0.303451	0.615798
AN8112	AN8112	Predicted ransmembrane transporter; predicted secondary metabolism gene cluster member	AN8105 cluster		-0.313199	0.483079	0.378128	0.415577	-1.18487	0.00233368	-0.493539	0.241549
number of genes in the cluster:				10
up-regulated genes in the cluster:					0		2		0		0
down-regulated genes in the cluster:					0		0		1		1
number of the studied genes:				10748
up-regulated genes (total):					1875		2482		2840		2487
down-regulated genes (total):					1985		2514		2643		2386
p-value for up-regulated genes (Fisher's exact test):					1		0.7104		1		1
p-value for down-regulated genes (Fisher's exact test):					1		1		0.9406		0.9188
GENE ID	Gene name	Feature (AspGD)	Cluster	Key gene	log2FC	adj. p-value	log2FC	adj. p-value	log2FC	adj. p-value	log2FC	adj. p-value
					reference strain, Cd treated vs.	reference strain, untreated	DatfA mutant, Cd treated vs.	DatfA mutant, untreated	DatfA mutant, untreated vs.	reference strain, untreated	DatfA mutant, Cd treated vs.	reference strain, Cd treated
AN12440	AN12440	Has domain(s) with predicted catalytic activity, phosphopantetheine binding, transferase activity and role in metabolic process	AN8142 cluster		-0.0851794	0.88805	0.161342	0.910838	-4.15101	8.18024e-08	-3.90449	7.76153e-08
AN8139	CYP652A1	Putative cytochrome P450	AN8142 cluster		0.742597	NA	0	NA	-1.22812	NA	-2.07489	NA
AN8140	AN8140	Has domain(s) with predicted FAD binding, oxidoreductase activity and role in metabolic process	AN8142 cluster		2.23984	NA	-2.96077	NA	2.59024	NA	-2.61036	0.338456
AN8141	CYP5073A1	Putative cytochrome P450	AN8142 cluster		0.758071	NA	0	NA	0	NA	-1.1286	NA
AN8142	AN8142	Putative UbiA-like prenyltransferase; transcript repressed by nitrate	AN8142 cluster	Prenyltransferase	0	NA	-1.06596	NA	0.695431	NA	0	NA
AN8143	AN8143	Has domain(s) with predicted role in isoprenoid biosynthetic process	AN8142 cluster		0.707593	NA	-1.87613	NA	0.543825	NA	-2.0399	0.641866
AN8144	AN8144	Ortholog of A. nidulans FGSC A4 : AN1651, A. fumigatus Af293 : Afu5g14600, Afu6g00460, Afu6g13950, A. niger CBS 513.88 : An11g02490, An01g11420 and A. oryzae RIB40 : AO090001000384, AO090011000740	AN8142 cluster		1.54927	NA	-1.06596	NA	0.695415	NA	-1.91982	NA
number of genes in the cluster:				7
up-regulated genes in the cluster:					0		0		0		0
down-regulated genes in the cluster:					0		0		1		1
number of the studied genes:				10748
up-regulated genes (total):					1875		2482		2840		2487
down-regulated genes (total):					1985		2514		2643		2386
p-value for up-regulated genes (Fisher's exact test):					1		1		1		1
p-value for down-regulated genes (Fisher's exact test):					1		1		0.8614		0.8276
GENE ID	Gene name	Feature (AspGD)	Cluster	Key gene	log2FC	adj. p-value	log2FC	adj. p-value	log2FC	adj. p-value	log2FC	adj. p-value
					reference strain, Cd treated vs.	reference strain, untreated	DatfA mutant, Cd treated vs.	DatfA mutant, untreated	DatfA mutant, untreated vs.	reference strain, untreated	DatfA mutant, Cd treated vs.	reference strain, Cd treated
AN8209	wA	Polyketide synthase involved in biosynthesis of the dark green pigment in the conidium wall that contributes to UV resistance; mutants produce white colonies due to colorless conidia; member of secondary metabolite gene cluster with AN8210	AN8209 (wA) cluster	PKS	0.174118	0.450607	0.0346527	0.913029	-1.30686	6.77491e-11	-1.44632	7.98713e-14
AN8208	AN8208	Has domain(s) with predicted role in histone deacetylation and HDA1 complex localization	AN8209 (wA) cluster		0.501172	0.00028678	0.571065	1.44175e-05	-0.0935929	0.550838	-0.0236999	0.899658
AN12403	AN12403	Ortholog(s) have role in mitotic actomyosin contractile ring contraction, mitotic division septum assembly, regulation of cell shape	AN8209 (wA) cluster		-0.410654	0.00266163	-0.50576	8.53917e-05	-0.03444	0.82772	-0.129546	0.406763
AN12404	AN12404	Ortholog of A. nidulans FGSC A4 : AN8899, A. fumigatus Af293 : Afu2g01030, Afu5g03420, A. niger CBS 513.88 : An09g05780 and A. oryzae RIB40 : AO090102000551, AO090701000360	AN8209 (wA) cluster		0.27338	0.0664385	0.327046	0.017175	0.0246232	0.885024	0.0782895	0.639025
number of genes in the cluster:				4
up-regulated genes in the cluster:					1		2		0		0
down-regulated genes in the cluster:					1		1		1		1
number of the studied genes:				10748
up-regulated genes (total):					1875		2482		2840		2487
down-regulated genes (total):					1985		2514		2643		2386
p-value for up-regulated genes (Fisher's exact test):					0.5356		0.23		1		1
p-value for down-regulated genes (Fisher's exact test):					0.5582		0.6556		0.6767		0.6337
GENE ID	Gene name	Feature (AspGD)	Cluster	Key gene	log2FC	adj. p-value	log2FC	adj. p-value	log2FC	adj. p-value	log2FC	adj. p-value
					reference strain, Cd treated vs.	reference strain, untreated	DatfA mutant, Cd treated vs.	DatfA mutant, untreated	DatfA mutant, untreated vs.	reference strain, untreated	DatfA mutant, Cd treated vs.	reference strain, Cd treated
AN10486	AN10486	Putative nonribosomal peptide synthetase (NRPS)-like enzyme	AN10486 cluster	NRPS	0.0538091	0.866385	0.896114	8.55753e-05	-0.772773	0.0008822	0.0695322	0.818139
AN10491	AN10491	Putative transcription factor; predicted role in secondary metabolite production	AN10486 cluster	TF	-0.191162	0.709181	0.356247	0.427441	-0.889258	0.0243733	-0.341849	0.46012
AN3911	AN3911	Putative transcription factor; predicted role in secondary metabolite production	AN10486 cluster	TF	-0.251508	0.0999163	-0.32393	0.0237077	-0.348757	0.0123273	-0.421179	0.00282708
number of genes in the cluster:				3
up-regulated genes in the cluster:					0		1		0		0
down-regulated genes in the cluster:					0		1		3		1
number of the studied genes:				10748
up-regulated genes (total):					1875		2482		2840		2487
down-regulated genes (total):					1985		2514		2643		2386
p-value for up-regulated genes (Fisher's exact test):					1		0.5452		1		1
p-value for down-regulated genes (Fisher's exact test):					1		0.5504		0.01486		0.5291
GENE ID	Gene name	Feature (AspGD)	Cluster	Key gene	log2FC	adj. p-value	log2FC	adj. p-value	log2FC	adj. p-value	log2FC	adj. p-value
					reference strain, Cd treated vs.	reference strain, untreated	DatfA mutant, Cd treated vs.	DatfA mutant, untreated	DatfA mutant, untreated vs.	reference strain, untreated	DatfA mutant, Cd treated vs.	reference strain, Cd treated
AN3612	AN3612	Putative polyketide synthase	AN10430 cluster. AN3612 cluster	PKS	0.657328	0.275212	1.0245	0.0590891	-0.344871	0.583995	0.0222964	0.973004
AN3611	AN3611	Protein of unknown function; transcript is induced by nitrate; predicted NirA binding site	AN10430 cluster. AN3612 cluster		0	NA	0.857614	NA	0	NA	0.794975	NA
AN10430	AN10430	Putative polyketide synthase (PKS) encoded in a secondary metabolite gene cluster	AN10430 cluster. AN3612 cluster	PKS	-0.559479	NA	-0.0897805	NA	-0.600922	NA	-0.131223	0.961758
AN10447	AN10447	Has domain(s) with predicted transferase activity, transferring acyl groups activity	AN10430 cluster. AN3612 cluster		0.275878	0.455345	1.02262	0.00683685	-2.03024	4.86859e-09	-1.2835	3.7278e-05
AN3609	CYP681A1	Putative cytochrome P450	AN10430 cluster. AN3612 cluster		1.14278	0.00155433	2.22491	8.91377e-09	-1.3389	0.00148059	-0.256777	0.509519
AN3608	atrC	Putative ATP-binding cassette (ABC) transporter; atrC mRNA levels increase in response to cyclohexamide treatment	AN3612 cluster		0.49654	0.00364404	1.03484	2.0594e-09	-1.06055	1.36148e-09	-0.522252	0.0012371
AN3607	lreB	Putative zinc-finger transcription factor involved in blue-light responsive differentiation; interacts with VeA, FphA, and LreA; similar to N. crassa blue-light-sensing component WC-2	AN3612 cluster	TF	0.0434762	0.885158	0.986876	5.52616e-06	-0.850113	0.000166028	0.093287	0.725731
AN3606	AN3606	Ortholog of A. fumigatus Af293 : Afu4g12700, A. niger CBS 513.88 : An03g02800, A. oryzae RIB40 : AO090009000298, Aspergillus wentii : Aspwe1_0047287 and Aspergillus sydowii : Aspsy1_0090817	AN3612 cluster		-0.976783	3.58119e-15	-0.931215	3.12929e-12	-2.29913	1.68242e-79	-2.25356	1.05711e-70
AN3605	AN3605	Has domain(s) with predicted oxidoreductase activity and role in oxidation-reduction process	AN3612 cluster		-0.626115	8.48058e-07	-0.287111	0.0646726	-1.59758	2.61059e-36	-1.25857	2.03273e-21
number of genes in the cluster:				9
up-regulated genes in the cluster:					2		4		0		0
down-regulated genes in the cluster:					2		1		7		4
number of the studied genes:				10748
up-regulated genes (total):					1875		2482		2840		2487
down-regulated genes (total):					1985		2514		2643		2386
p-value for up-regulated genes (Fisher's exact test):					0.4832		0.1319		1		1
p-value for down-regulated genes (Fisher's exact test):					0.5163		0.9092		0.001201		0.1174
GENE ID	Gene name	Feature (AspGD)	Cluster	Key gene	log2FC	adj. p-value	log2FC	adj. p-value	log2FC	adj. p-value	log2FC	adj. p-value
					reference strain, Cd treated vs.	reference strain, untreated	DatfA mutant, Cd treated vs.	DatfA mutant, untreated	DatfA mutant, untreated vs.	reference strain, untreated	DatfA mutant, Cd treated vs.	reference strain, Cd treated
AN3497	CYP623B2	Putative cytochrome P450	inp cluster		0.182644	0.319213	0.846052	1.02651e-08	-0.17582	0.304105	0.487588	0.00146403
AN3496	inpB	Putative nonribosomal peptide synthetase with a role in asperfuranone biosynthesis; inp secondary metabolite gene cluster member; expression controlled by scpR; transcriptionally silent under standard laboratory conditions	inp cluster	NRPS	0.780289	0.138236	3.6182	1.92176e-10	-2.01207	0.00125545	0.825846	0.0622313
AN3495	inpA	Putative nonribosomal peptide synthetase with a role in asperfuranone biosynthesis; inp secondary metabolite gene cluster member; expression controlled by scpR; transcriptionally silent under standard laboratory conditions	inp cluster	NRPS	1.724	NA	-0.136893	0.953389	0.600849	0.763885	-1.26005	0.477442
AN3494	AN3494	Protein of unknown function; member of the inp secondary metabolite gene cluster	inp cluster		-1.93607	NA	0	NA	-1.99871	NA	0	NA
AN3493	AN3493	Predicted threonine-type endopeptidase; inp secondary metabolite gene cluster member	inp cluster		2.51054	7.19112e-14	3.97822	4.04414e-27	-1.36372	0.0011818	0.103962	0.798585
AN3492	scpR	C2H2 type zinc finger transcription factor; regulator of asperfuranone biosynthesis; inp secondary metabolite gene cluster member	inp cluster	TF	2.66333	0.00373243	4.49161	0.00173194	-2.70337	0.0923471	-0.875091	0.246772
AN3491	AN3491	Predicted transmembrane transporter; inp secondary metabolite gene cluster member	inp cluster		3.69152	3.02774e-44	5.22377	1.2003e-32	-2.845	1.55272e-09	-1.31275	6.0969e-09
AN3490	AN3490	Predicted acetyl CoA synthase; inp secondary metabolite gene cluster member	inp cluster		4.83791	8.10569e-08	6.11261	6.19795e-06	-3.13596	0.0522887	-1.86127	0.000430927
number of genes in the cluster:				8
up-regulated genes in the cluster:					4		6		0		1
down-regulated genes in the cluster:					0		0		3		2
number of the studied genes:				10748
up-regulated genes (total):					1875		2482		2840		2487
down-regulated genes (total):					1985		2514		2643		2386
p-value for up-regulated genes (Fisher's exact test):					0.03572		0.002725		1		0.8783
p-value for down-regulated genes (Fisher's exact test):					1		1		0.3113		0.5594
GENE ID	Gene name	Feature (AspGD)	Cluster	Key gene	log2FC	adj. p-value	log2FC	adj. p-value	log2FC	adj. p-value	log2FC	adj. p-value
					reference strain, Cd treated vs.	reference strain, untreated	DatfA mutant, Cd treated vs.	DatfA mutant, untreated	DatfA mutant, untreated vs.	reference strain, untreated	DatfA mutant, Cd treated vs.	reference strain, Cd treated
AN10600	AN10600	Predicted transcription factor; secondary metabolite gene cluster member; coregulated with the NRPS AN4827	AN4827 cluster	TF	1.10001	0.000103309	1.46568	3.77635e-06	-1.22621	0.00020894	-0.860544	0.00128726
AN4827	AN4827	Putative nonribosomal peptide synthetase (NRPS)-like enzyme; predicted backbone enzyme of a secondary metabolite gene cluster with AN10600	AN4827 cluster	NRPS	0.852102	0.0546766	0.729934	0.14668	-0.918813	0.0591498	-1.04098	0.0117729
AN4826	AN4826	Has domain(s) with predicted role in transmembrane transport and integral component of membrane localization	AN4827 cluster		0.876423	NA	-0.406198	0.826723	-0.217516	0.89592	-1.50014	0.30662
AN4825	AN4825	Putative glucan 1,3-beta-glucosidase with a predicted role in glucan metabolism	AN4827 cluster		-0.173238	0.590967	0.568025	0.0371919	-0.911226	0.000433929	-0.169963	0.58621
AN4824	AN4824	Has domain(s) with predicted transferase activity, transferring glycosyl groups activity and membrane localization	AN4827 cluster		0.130034	0.575067	0.826557	1.54708e-06	0.169394	0.404033	0.865917	5.32236e-07
AN4823	AN4823	Putative chitin deacetylase	AN4827 cluster		0.572846	0.592322	0.57548	0.580625	-0.415169	0.695077	-0.412535	0.685014
AN9445	AN9445	Has domain(s) with predicted ATP binding, nucleic acid binding activity	AN4827 cluster		0.544331	0.624802	0.26492	0.813665	0.00681131	0.994653	-0.2726	0.80307
AN9446	panK	Putative pantothenate kinase with a predicted role in Coenzyme A and pantothenate biosynthesis	AN4827 cluster		-0.197993	0.332348	-0.842197	2.61668e-08	1.04178	1.83193e-11	0.39758	0.0221185
AN11232	AN11232	Has domain(s) with predicted phosphatidylinositol N-acetylglucosaminyltransferase activity, role in GPI anchor biosynthetic process and integral component of membrane localization	AN4827 cluster		0.40364	0.0841503	0.0443467	0.867396	1.31065	3.25378e-11	0.951355	1.09858e-06
number of genes in the cluster:				9
up-regulated genes in the cluster:					1		3		2		3
down-regulated genes in the cluster:					0		2		2		2
number of the studied genes:				10748
up-regulated genes (total):					1875		2482		2840		2487
down-regulated genes (total):					1985		2514		2643		2386
p-value for up-regulated genes (Fisher's exact test):					0.822		0.346		0.7327		0.3473
p-value for down-regulated genes (Fisher's exact test):					1		0.6594		0.6898		0.6275
GENE ID	Gene name	Feature (AspGD)	Cluster	Key gene	log2FC	adj. p-value	log2FC	adj. p-value	log2FC	adj. p-value	log2FC	adj. p-value
					reference strain, Cd treated vs.	reference strain, untreated	DatfA mutant, Cd treated vs.	DatfA mutant, untreated	DatfA mutant, untreated vs.	reference strain, untreated	DatfA mutant, Cd treated vs.	reference strain, Cd treated
AN10573	ivoC	Putative cytochrome P450; transcrip/tionally coregulated with ivoA/AN10576	ivo cluster		1.01806	0.322932	-0.353372	0.737911	1.1197	0.231074	-0.251728	0.822089
AN10576	ivoA	One module nonribosomal peptide synthetase (NRPS); N-acetyl-6-hydroxytryptophan (AHT) biosynthesis; mutant conidiophores, stalks, metulae, phialides lack pigmentation; secondary metabolism gene cluster member	ivo cluster	NRPS	0.183433	0.788346	0.268833	0.664691	-0.274613	0.644409	-0.189213	0.769811
number of genes in the cluster:				2
up-regulated genes in the cluster:					0		0		0		0
down-regulated genes in the cluster:					0		0		0		0
number of the studied genes:				10748
up-regulated genes (total):					1875		2482		2840		2487
down-regulated genes (total):					1985		2514		2643		2386
p-value for up-regulated genes (Fisher's exact test):					1		1		1		1
p-value for down-regulated genes (Fisher's exact test):					1		1		1		1
GENE ID	Gene name	Feature (AspGD)	Cluster	Key gene	log2FC	adj. p-value	log2FC	adj. p-value	log2FC	adj. p-value	log2FC	adj. p-value
					reference strain, Cd treated vs.	reference strain, untreated	DatfA mutant, Cd treated vs.	DatfA mutant, untreated	DatfA mutant, untreated vs.	reference strain, untreated	DatfA mutant, Cd treated vs.	reference strain, Cd treated
AN7086	AN7086	Putative F-box protein; predicted secondary metabolism gene cluster member	AN7084 cluster		0.280212	0.278902	0.767491	0.00080938	-0.761891	0.000973748	-0.274613	0.266495
AN12291	AN12291	Ortholog of A. nidulans FGSC A4 : AN8528, A. fumigatus Af293 : Afu5g09790, A. niger CBS 513.88 : An15g05030, A. oryzae RIB40 : AO090010000330 and Aspergillus wentii : Aspwe1_0054537, Aspwe1_0170434	AN7084 cluster		1.74691	2.29942e-12	1.38629	2.17736e-05	-1.7827	2.42858e-08	-2.14333	9.59733e-19
AN12290	AN12290	Has domain(s) with predicted oxidoreductase activity and role in metabolic process	AN7084 cluster		0.543578	2.56634e-06	0.40591	0.00071265	-0.652164	2.04295e-08	-0.789832	6.72611e-13
AN7084	AN7084	Putative polyketide synthase (PKS)-like enzyme; predicted secondary metabolism gene cluster member	AN7084 cluster	PKS	0.488345	0.0840934	0.332195	0.316771	-1.14482	4.47676e-05	-1.30097	5.50871e-07
AN7083	AN7083	Predicted aminopeptidase; predicted secondary metabolism gene cluster member	AN7084 cluster		1.32312	0.0872945	-0.203153	0.8498	-0.248392	0.791991	-1.77466	0.0158603
AN10887	CYP5095B1	Putative cytochrome P450; predicted secondary metabolism gene cluster member	AN7084 cluster		0.691729	0.213774	-0.395878	0.644668	-1.59943	0.0077245	-2.68703	5.86487e-06
AN10886	AN10886	Protein of unknown function; predicted secondary metabolism gene cluster member	AN7084 cluster		0.4894	0.00280987	0.451359	0.00957525	-1.36207	1.19605e-17	-1.40011	3.78899e-20
AN7081	AN7081	Predicted UDP-N-acetylmuramate dehydrogenase; predicted secondary metabolism gene cluster member	AN7084 cluster		0.386888	0.0520116	0.798738	5.31451e-05	-1.73296	1.62667e-20	-1.32111	1.27694e-13
AN7080	AN7080	Protein of unknown function; predicted secondary metabolism gene cluster member	AN7084 cluster		0.176475	0.584086	0.907025	0.000339484	-0.568804	0.0359214	0.161745	0.590868
number of genes in the cluster:				9
up-regulated genes in the cluster:					3		6		0		0
down-regulated genes in the cluster:					0		0		8		7
number of the studied genes:				10748
up-regulated genes (total):					1875		2482		2840		2487
down-regulated genes (total):					1985		2514		2643		2386
p-value for up-regulated genes (Fisher's exact test):					0.1968		0.006576		1		1
p-value for down-regulated genes (Fisher's exact test):					1		1		9.334e-05		0.000618
GENE ID	Gene name	Feature (AspGD)	Cluster	Key gene	log2FC	adj. p-value	log2FC	adj. p-value	log2FC	adj. p-value	log2FC	adj. p-value
					reference strain, Cd treated vs.	reference strain, untreated	DatfA mutant, Cd treated vs.	DatfA mutant, untreated	DatfA mutant, untreated vs.	reference strain, untreated	DatfA mutant, Cd treated vs.	reference strain, Cd treated
AN7075	AN7075	Has domain(s) with predicted UDP-N-acetylmuramate dehydrogenase activity, flavin adenine dinucleotide binding, oxidoreductase activity and role in oxidation-reduction process	pkg cluster		-0.242866	0.898444	0.464891	0.792696	-0.729081	0.643137	-0.0213237	0.99106
AN7074	AN7074	Putative oxidoreductase; induced in pyrG mutant in response to excess uracil	pkg cluster		0.92105	0.000295751	0.76548	0.0159087	-2.64005	1.93017e-21	-2.79562	1.20567e-28
AN7073	AN7073	Putative transcription factor; predicted role in secondary metabolite production; predicted secondary metabolism gene cluster member; coregulated with the PKS pkgA/AN7071	pkg cluster	TF	1.19637	0.227207	1.29769	0.22679	-0.944212	0.409232	-0.842886	0.366716
AN7072	AN7072	Predicted DNA binding protein; ortholog has a role in aflatoxin biosynthesis; predicted secondary metabolism gene cluster member; coregulated with the PKS pkgA/AN7071	pkg cluster	TF	4.09585	NA	0.659335	0.643406	3.41086	0.0467129	-0.0256543	0.987177
AN7071	pkgA	Putative polyketide synthase; involved in the production of alternariol and other secondary metabolites; predicted backbone enzyme of a secondary metabolism gene cluster	pkg cluster	PKS	1.62384	NA	-0.431458	0.850363	1.95402	0.368221	-0.101284	0.96733
AN7070	pkgB	Beta-lactamase-type thioesterase; involved in production of alternariol and other secondary metabolites; predicted secondary metabolism gene cluster member; coregulated with the PKS pkgA/AN7071	pkg cluster		-1.01717	NA	-0.134709	NA	-0.151561	NA	0.730899	0.830321
AN10884	AN10884	Predicted oxidoreductase; predicted secondary metabolism gene cluster member	pkg cluster		0.392618	0.508385	0.296655	0.615053	-0.249714	0.669544	-0.345676	0.536451
AN10889	AN10889	Predicted O-methyltransferase; predicted secondary metabolism gene cluster member; coregulated with the PKS pkgA/AN7071	pkg cluster		0.287979	0.76356	0.744691	0.352161	-0.375757	0.667757	0.0809553	0.934183
number of genes in the cluster:				8
up-regulated genes in the cluster:					1		1		1		0
down-regulated genes in the cluster:					0		0		1		1
number of the studied genes:				10748
up-regulated genes (total):					1875		2482		2840		2487
down-regulated genes (total):					1985		2514		2643		2386
p-value for up-regulated genes (Fisher's exact test):					0.7844		0.8777		0.9142		1
p-value for down-regulated genes (Fisher's exact test):					1		1		0.8955		0.8659
GENE ID	Gene name	Feature (AspGD)	Cluster	Key gene	log2FC	adj. p-value	log2FC	adj. p-value	log2FC	adj. p-value	log2FC	adj. p-value
					reference strain, Cd treated vs.	reference strain, untreated	DatfA mutant, Cd treated vs.	DatfA mutant, untreated	DatfA mutant, untreated vs.	reference strain, untreated	DatfA mutant, Cd treated vs.	reference strain, Cd treated
AN7485	mirC	Predicted siderophore iron transporter	AN7489 (mirC) cluster		0.298005	0.0257115	0.385161	0.00146567	0.274589	0.030938	0.361745	0.0032941
AN7487	modA	Rho GTPase protein involved in hyphal cell polarity, hyphal branch formation and normal germination of conidia; required for wild-type conidophore development; GFP-Cdc42 localizes to hyphal tip; synthetically lethal with racA null	AN7489 (mirC) cluster		0.332977	0.000146651	-0.179239	0.045587	0.226733	0.00901678	-0.285484	0.000955814
AN7488	AN7488	Has domain(s) with predicted hydrolase activity, acting on carbon-nitrogen (but not peptide) bonds, in linear amidines, metal ion binding activity	AN7489 (mirC) cluster		0.555403	0.00373973	1.01653	2.7705e-09	-0.143746	0.508939	0.317381	0.0780622
AN7489	AN7489	Putative type II fatty acid synthase with a predicted role in mitochondrial fatty acid formation; mitochondrial 3-oxoacyl-[acyl-carrier-protein]-synthase; putative polyketide synthase (PKS-like) protein	AN7489 (mirC) cluster	mitochondrial 3-oxoacyl-[acylcarrier-protein]-synthase	0.348129	0.088028	0.371332	0.0273127	0.670031	0.000163783	0.693234	2.84365e-05
AN7491	AN7491	Putative ubiquitin C-terminal hydrolase; ortholog of S. cerevisiae Yuh1p which has role in protein deubiquitination; expression upregulated after exposure to farnesol	AN7489 (mirC) cluster		0.0314118	0.841293	0.0435179	0.761092	0.0629574	0.625708	0.0750635	0.584837
AN7490	AN7490	Has domain(s) with predicted methyltransferase activity and role in nucleobase-containing compound metabolic process	AN7489 (mirC) cluster		0.31853	0.568118	-0.434825	0.392476	0.0956538	0.862113	-0.657701	0.175572
AN7492	AN7492	Ortholog(s) have RNA 7-methylguanosine cap binding, exoribonuclease activator activity, hydrolase activity, acting on acid anhydrides, in phosphorus-containing anhydrides, m7G(5')pppN diphosphatase activity	AN7489 (mirC) cluster		-0.0108341	0.962465	-0.359323	0.0210908	0.574062	0.000159842	0.225573	0.188584
AN7493	AN7493	Has domain(s) with predicted role in RNA catabolic process and ribonuclease H2 complex localization	AN7489 (mirC) cluster		0.197409	0.377886	0.0724609	0.749268	0.319523	0.0981238	0.194575	0.346149
number of genes in the cluster:				8
up-regulated genes in the cluster:					3		3		4		2
down-regulated genes in the cluster:					0		2		0		1
number of the studied genes:				10748
up-regulated genes (total):					1875		2482		2840		2487
down-regulated genes (total):					1985		2514		2643		2386
p-value for up-regulated genes (Fisher's exact test):					0.1497		0.2746		0.1344		0.5849
p-value for down-regulated genes (Fisher's exact test):					1		0.5916		1		0.8659
GENE ID	Gene name	Feature (AspGD)	Cluster	Key gene	log2FC	adj. p-value	log2FC	adj. p-value	log2FC	adj. p-value	log2FC	adj. p-value
					reference strain, Cd treated vs.	reference strain, untreated	DatfA mutant, Cd treated vs.	DatfA mutant, untreated	DatfA mutant, untreated vs.	reference strain, untreated	DatfA mutant, Cd treated vs.	reference strain, Cd treated
AN7804	stcW	Putative FAD-containing monooxygenase with a predicted role in sterigmatocystin/aflatoxin biosynthesis; member of the sterigmatocystin biosynthesis gene cluster; expression upregulated after exposure to farnesol	Sterigmatocystin (stc) cluster		0.546319	0.549272	0.197484	0.856605	-0.6514	0.464356	-1.00024	0.220668
AN7805	stcV	Putative norsolorinic acid reductase with a predicted role in sterigmatocystin/aflatoxin biosynthesis; member of the sterigmatocystin biosynthesis gene cluster	Sterigmatocystin (stc) cluster		0.5324	0.0099484	0.993784	4.75207e-06	-1.77352	1.28003e-17	-1.31214	6.96146e-12
AN7806	stcU	Putative versicolorin reductase with a predicted role in sterigmatocystin/aflatoxin biosynthesis; member of the sterigmatocystin biosynthesis gene cluster	Sterigmatocystin (stc) cluster		-0.49876	0.500226	1.67626	0.0875629	-3.20404	0.000212623	-1.02903	0.155902
AN7807	stcT	Putative translation elongation factor 1 gamma; member of the sterigmatocystin biosynthesis gene cluster	Sterigmatocystin (stc) cluster		NA	NA	NA	NA	NA	NA	NA	NA
AN12089	AN12089	Ortholog of A. niger CBS 513.88 : An11g02070, A. oryzae RIB40 : AO090124000044, AO090005000192 and Aspergillus versicolor : Aspve1_0045579, Aspve1_0073154, Aspve1_0081145	Sterigmatocystin (stc) cluster		NA	NA	NA	NA	NA	NA	NA	NA
AN7808	stcS	Putative sterigmatocystin biosynthesis P450 monooxygenase of the CYP59 family; predicted role in sterigmatocystin/aflatoxin biosynthesis; member of the sterigmatocystin biosynthesis gene cluster	Sterigmatocystin (stc) cluster		1.52563	NA	-0.104174	0.973144	-2.24374	0.262537	-3.87354	0.032949
AN7809	AN7809	Ortholog of Aspergillus versicolor : Aspve1_0126175 and Aspergillus terreus NIH2624 : ATET_01291	Sterigmatocystin (stc) cluster		NA	NA	NA	NA	NA	NA	NA	NA
AN7810	stcQ	Putative aflatoxin biosynthesis protein with a role in aflatoxin/sterigmatocystin biosynthesis; member of the sterigmatocystin biosynthesis gene cluster	Sterigmatocystin (stc) cluster		-1.57667	NA	0	NA	-2.6011	NA	-1.1286	0.818139
AN12090	AN12090	Has domain(s) with predicted O-methyltransferase activity	Sterigmatocystin (stc) cluster		2.13206	NA	0.857616	NA	0	NA	-1.54081	NA
AN7811	stcO	Putative sterigmatocystin biosynthesis protein with a predicted role in sterigmatocystin/aflatoxin biosynthesis; member of the sterigmatocystin biosynthesis gene cluster; transcript repressed by nitrate	Sterigmatocystin (stc) cluster		0	NA	0.857614	NA	0	NA	0.794975	NA
AN7812	stcN	Putative versicolorin B synthase with a predicted role in sterigmatocystin/aflatoxin biosynthesis; member of the sterigmatocystin biosynthesis gene cluster	Sterigmatocystin (stc) cluster		0.76614	NA	1.76084	NA	-1.22813	NA	-0.23343	0.958992
AN11017	AN11017	Ortholog of A. nidulans FGSC A4 : AN12099, A. fumigatus Af293 : Afu4g14480, A. oryzae RIB40 : AO090026000010 and N. fischeri NRRL 181 : NFIA_101640, NFIA_101900	Sterigmatocystin (stc) cluster		0	NA	0.857614	NA	0	NA	0.794975	NA
AN11013	stcL	Putative p450 monooxygenase required for desaturation of bisfuran in the sterigmatocystin biosynthesis pathway; member of the sterigmatocystin biosynthesis gene cluster	Sterigmatocystin (stc) cluster		1.62326	NA	0.540981	0.66834	2.12624	0.171907	1.04396	0.410276
AN7814	stcK	Putative polyketide synthase/fatty acid synthase beta; required for sterigmatocystin biosynthesis; member of the sterigmatocystin biosynthesis gene cluster	Sterigmatocystin (stc) cluster	PKS	0.238936	0.384833	0.319118	0.236531	-0.667235	0.00655638	-0.587052	0.012733
AN7815	stcJ	Putative polyketide synthase/fatty acid synthase alpha; putative role in aflatoxin biosynthesis; required for sterigmatocystin biosynthesis; member of the sterigmatocystin biosynthesis gene cluster	Sterigmatocystin (stc) cluster	PKS	0.119485	0.654511	0.734175	0.000505284	-0.735755	0.000582093	-0.121065	0.629406
AN7816	stcI	Putative sterigmatocystin biosynthesis lipase/esterase with a predicted role in sterigmatocystin/aflatoxin biosynthesis; member of the sterigmatocystin biosynthesis gene cluster	Sterigmatocystin (stc) cluster		0.229245	0.435165	0.708548	0.00274889	-0.179125	0.519031	0.300178	0.248405
AN11021	AN11021	Ortholog of A. oryzae RIB40 : AO090001000219, Aspergillus brasiliensis : Aspbr1_0192818, N. fischeri NRRL 181 : NFIA_012970, Aspergillus flavus NRRL 3357 : AFL2T_07452 and A. clavatus NRRL 1 : ACLA_022880	Sterigmatocystin (stc) cluster		-0.193436	0.66207	-0.048286	0.918037	-0.14115	0.721604	0.00399978	0.993114
AN7817	AN7817	Putative protein with a predicted role in sterigmatocystin/aflatoxin biosynthesis	Sterigmatocystin (stc) cluster		-0.314704	0.76356	0.627757	0.532054	-1.24786	0.157004	-0.305395	0.768956
AN7818	stcF	Putative sterigmatocystin biosynthesis P450 monooxygenase with a predicted role in sterigmatocystin/aflatoxin biosynthesis	Sterigmatocystin (stc) cluster		-0.954141	0.0132317	-0.584843	0.158375	-0.718603	0.0482368	-0.349305	0.455825
AN7819	AN7819	Ortholog(s) have role in aflatoxin biosynthetic process, regulation of aflatoxin biosynthetic process	Sterigmatocystin (stc) cluster		0.263261	0.531782	0.378175	0.291958	-0.00427136	0.991412	0.110643	0.792554
AN7821	stcE	Putative norsolorinic acid reductase with a predicted role in sterigmatocystin/aflatoxin biosynthesis; member of the sterigmatocystin biosynthesis gene cluster	Sterigmatocystin (stc) cluster		1.48958	0.036677	0.896341	0.430306	-1.86261	0.0544487	-2.45586	0.000726236
AN7822	AN7822	Ortholog of A. fumigatus Af293 : Afu5g00770, Aspergillus brasiliensis : Aspbr1_0058805, N. fischeri NRRL 181 : NFIA_041410, Aspergillus flavus NRRL 3357 : AFL2T_07218 and A. clavatus NRRL 1 : ACLA_004530	Sterigmatocystin (stc) cluster		0.0347234	0.879953	0.402162	0.152212	-3.21458	1.93408e-52	-2.84714	1.28854e-49
AN7820	aflR	Transcriptional activator of the sterigmatocystin biosynthesis gene cluster; contains DNA-binding C6 zinc binuclear cluster motifs; transcript repressed by nitrate; negatively regulated by PKA activity	Sterigmatocystin (stc) cluster	TF	0.209474	0.873994	-0.458148	0.750718	-1.16121	0.299499	-1.82883	0.105214
AN7823	stcC	Putative peroxidase; member of the sterigmatocystin biosynthesis gene cluster	Sterigmatocystin (stc) cluster		0.236757	0.701947	0.834055	0.138055	-1.27774	0.0150421	-0.68044	0.192025
AN7824	stcB	Putative sterigmatocystin biosynthesis P450 monooxygenase with a predicted role in sterigmatocystin/aflatoxin biosynthesis; member of the sterigmatocystin biosynthesis gene cluster	Sterigmatocystin (stc) cluster		-0.256022	0.6569	0.162401	0.780635	-0.523958	0.281432	-0.105534	0.862457
AN7825	stcA	Putative polyketide synthase with a predicted role in sterigmatocystin/aflatoxin biosynthesis; member of the sterigmatocystin biosynthesis gene cluster	Sterigmatocystin (stc) cluster	PKS	1.22321	0.00473292	0.574298	0.19235	0.146086	0.783595	-0.502822	0.229413
number of genes in the cluster:				26
up-regulated genes in the cluster:					3		3		0		0
down-regulated genes in the cluster:					1		0		7		5
number of the studied genes:				10748
up-regulated genes (total):					1875		2482		2840		2487
down-regulated genes (total):					1985		2514		2643		2386
p-value for up-regulated genes (Fisher's exact test):					0.8565		0.9589		1		1
p-value for down-regulated genes (Fisher's exact test):					0.9951		1		0.4651		0.7157
GENE ID	Gene name	Feature (AspGD)	Cluster	Key gene	log2FC	adj. p-value	log2FC	adj. p-value	log2FC	adj. p-value	log2FC	adj. p-value
					reference strain, Cd treated vs.	reference strain, untreated	DatfA mutant, Cd treated vs.	DatfA mutant, untreated	DatfA mutant, untreated vs.	reference strain, untreated	DatfA mutant, Cd treated vs.	reference strain, Cd treated
AN11024	AN11024	Has domain(s) with predicted oxidoreductase activity and role in metabolic process	AN12331 cluster		-0.00859714	0.996209	0.488375	0.712212	-0.264857	0.845699	0.232116	0.870766
AN7836	AN7836	Ortholog of A. fumigatus Af293 : Afu7g01060, A. oryzae RIB40 : AO090003000833, Neosartorya fischeri NRRL 181 : NFIA_113770 and Aspergillus terreus NIH2624 : ATET_02590	AN12331 cluster		0.12743	0.47682	0.0643696	0.730227	-0.448798	0.00208049	-0.511858	0.000444806
AN12330	AN12330	Protein of unknown function	AN12331 cluster		0.163943	0.403486	1.13077	1.65017e-13	-0.464904	0.00555161	0.501919	0.00136196
AN12331	AN12331	Putative polyketide synthase (PKS)-like enzyme	AN12331 cluster	PKS	0.706781	1.97728e-05	0.918918	3.72097e-08	-0.715886	3.63122e-05	-0.503748	0.00174813
AN7839	AN7839	Has domain(s) with predicted ATP binding, ATPase activity, ATPase-coupled transmembrane transporter activity, nucleoside-triphosphatase activity, nucleotide binding activity and role in transmembrane transport	AN12331 cluster		0.846468	1.26719e-07	1.31966	1.314e-13	-1.83116	1.07158e-25	-1.35797	1.20922e-18
number of genes in the cluster:				5
up-regulated genes in the cluster:					2		3		0		1
down-regulated genes in the cluster:					0		0		4		3
number of the studied genes:				10748
up-regulated genes (total):					1875		2482		2840		2487
down-regulated genes (total):					1985		2514		2643		2386
p-value for up-regulated genes (Fisher's exact test):					0.2114		0.08438		1		0.7318
p-value for down-regulated genes (Fisher's exact test):					1		1		0.01467		0.07616
GENE ID	Gene name	Feature (AspGD)	Cluster	Key gene	log2FC	adj. p-value	log2FC	adj. p-value	log2FC	adj. p-value	log2FC	adj. p-value
					reference strain, Cd treated vs.	reference strain, untreated	DatfA mutant, Cd treated vs.	DatfA mutant, untreated	DatfA mutant, untreated vs.	reference strain, untreated	DatfA mutant, Cd treated vs.	reference strain, Cd treated
AN8379	ausB	Predicted oxidoreductase; required for austinol and dehydroaustinol biosynthesis	Austinol (aus) cluster 2		2.6328	NA	0.793673	NA	0.695437	NA	-1.14369	0.719273
AN11871	AN11871	Ortholog of A. fumigatus Af293 : Afu1g11260, Afu4g01030, Afu6g00270, A. niger CBS 513.88 : An03g03440, An01g01460, An01g01410, An04g04460 and Aspergillus wentii : Aspwe1_0176870	Austinol (aus) cluster 2		-1.16549	NA	2.34251	NA	-1.22813	NA	2.27987	0.606155
AN8381	ausC	Protein of unknown function; required for austinol and dehydroaustinol biosynthesis, aus secondary metabolism gene cluster member	Austinol (aus) cluster 2		-0.0136703	NA	-0.506616	0.726386	-0.0663918	0.96212	-0.559338	0.703246
AN8382	AN8382	Protein of unknown function; located in the aus secondary metabolite gene cluster	Austinol (aus) cluster 2		-0.203679	NA	0	NA	-1.22811	NA	-1.1286	NA
AN8383	ausA	Polyketide synthase (PKS); produces 3,5- dimethyl orsellinic acid, the first intermediate in the biosynthesis of austinol and dehydroaustinol; aus secondary metabolism gene cluster member	Austinol (aus) cluster 2	PKS	1.84014	0.137358	1.72854	0.2999	-1.61512	0.338395	-1.72672	0.126422
AN8384	ausD	Protein of unknown function; required for austinol and dehydroaustinol biosynthesis; aus secondary metabolism gene cluster member	Austinol (aus) cluster 2		2.684	NA	0.36078	0.892117	1.15192	0.648962	-1.17131	0.597042
number of genes in the cluster:				6
up-regulated genes in the cluster:					0		0		0		0
down-regulated genes in the cluster:					0		0		0		0
number of the studied genes:				10748
up-regulated genes (total):					1875		2482		2840		2487
down-regulated genes (total):					1985		2514		2643		2386
p-value for up-regulated genes (Fisher's exact test):					1		1		1		1
p-value for down-regulated genes (Fisher's exact test):					1		1		1		1
GENE ID	Gene name	Feature (AspGD)	Cluster	Key gene	log2FC	adj. p-value	log2FC	adj. p-value	log2FC	adj. p-value	log2FC	adj. p-value
					reference strain, Cd treated vs.	reference strain, untreated	DatfA mutant, Cd treated vs.	DatfA mutant, untreated	DatfA mutant, untreated vs.	reference strain, untreated	DatfA mutant, Cd treated vs.	reference strain, Cd treated
AN8408	apdB	Putative cytochrome P450 monooxygenase; member of the aspyridone (apd) gene cluster	Aspyridone (asp) cluster		0.0466978	NA	2.37305	0.238613	-2.24742	0.268265	0.0789335	0.969475
AN8409	apdC	Putative enoyl reductase; member of the aspyridone (apd) gene cluster	Aspyridone (asp) cluster		0	NA	-1.06596	NA	0.695431	NA	0	NA
AN8410	apdD	Putative FAD-dependent monooxygenase; member of the aspyridone (apd) gene cluster	Aspyridone (asp) cluster		0	NA	-1.06596	NA	0.695431	NA	0	NA
AN8411	apdE	Putative cytochrome P450 monooxygenase; member of the aspyridone (apd) gene cluster	Aspyridone (asp) cluster		-1.96966	0.0101201	-0.464881	0.583967	-1.04032	0.125595	0.464459	0.635419
AN8412	apdA	Putative hybrid polyketide synthase-nonribosomal peptide synthase (PKS-NRPS); aspyridone synthetase; member of the aspyridone (apd) gene cluster	Aspyridone (asp) cluster	PKS-NRPS	-0.404967	0.00966177	0.30754	0.0720019	-1.80877	6.29082e-35	-1.09627	9.13911e-14
AN8413	apdF	Putative exporter; member of the aspyridone (apd) gene cluster	Aspyridone (asp) cluster		0.397174	0.702262	1.31073	0.157779	-1.07262	0.26542	-0.159069	0.877711
AN8414	apdR	Putative transcription factor; member of the aspyridone (apd) gene cluster; role in aspyridone production	Aspyridone (asp) cluster	TF	-0.0511357	0.935002	0.351208	0.45835	-0.0537259	0.919184	0.348617	0.478671
AN11872	AN11872	Protein of unknown function	Aspyridone (asp) cluster		-0.343481	0.0378645	0.374196	0.0126827	0.369338	0.0152213	1.08702	2.9763e-14
AN8415	apdG	Putative acyl-coA dehydrogenase; member of the aspyridone (apd) gene cluster	Aspyridone (asp) cluster		0.114639	0.675166	-0.419173	0.082032	-0.606881	0.00522043	-1.14069	8.48891e-08
number of genes in the cluster:				9
up-regulated genes in the cluster:					0		1		1		1
down-regulated genes in the cluster:					3		0		2		2
number of the studied genes:				10748
up-regulated genes (total):					1875		2482		2840		2487
down-regulated genes (total):					1985		2514		2643		2386
p-value for up-regulated genes (Fisher's exact test):					1		0.906		0.9369		0.9065
p-value for down-regulated genes (Fisher's exact test):					0.2221		1		0.6898		0.6275
GENE ID	Gene name	Feature (AspGD)	Cluster	Key gene	log2FC	adj. p-value	log2FC	adj. p-value	log2FC	adj. p-value	log2FC	adj. p-value
					reference strain, Cd treated vs.	reference strain, untreated	DatfA mutant, Cd treated vs.	DatfA mutant, untreated	DatfA mutant, untreated vs.	reference strain, untreated	DatfA mutant, Cd treated vs.	reference strain, Cd treated
AN11082	AN11082	Ortholog of A. fumigatus Af293 : Afu3g01020, A. niger CBS 513.88 : An13g02710, A. oryzae RIB40 : AO090009000080, Aspergillus wentii : Aspwe1_0114128 and Aspergillus sydowii : Aspsy1_0159929	Nidulanin A (nptA) cluster		-0.191635	0.427612	-0.309298	0.126809	0.205124	0.332163	0.0874607	0.730472
AN11080	AN11080	Putative dimethyl-allyl-tryptophan synthase (DMATS)-type aromatic prenyltransferase	Nidulanin A (nptA) cluster	DMATS-type aromatic prenyltransferase	0.269509	0.033804	1.19119	5.81941e-18	-2.83403	4.1908e-106	-1.91235	2.47901e-61
number of genes in the cluster:				2
up-regulated genes in the cluster:					1		0		0		0
down-regulated genes in the cluster:					0		1		1		1
number of the studied genes:				10748
up-regulated genes (total):					1875		2482		2840		2487
down-regulated genes (total):					1985		2514		2643		2386
p-value for up-regulated genes (Fisher's exact test):					0.3185		1		1		1
p-value for down-regulated genes (Fisher's exact test):					1		0.4131		0.4314		0.3947
GENE ID	Gene name	Feature (AspGD)	Cluster	Key gene	log2FC	adj. p-value	log2FC	adj. p-value	log2FC	adj. p-value	log2FC	adj. p-value
					reference strain, Cd treated vs.	reference strain, untreated	DatfA mutant, Cd treated vs.	DatfA mutant, untreated	DatfA mutant, untreated vs.	reference strain, untreated	DatfA mutant, Cd treated vs.	reference strain, Cd treated
AN8495	AN8495	Ortholog of A. nidulans FGSC A4 : AN3479, AN3143, A. fumigatus Af293 : Afu3g01440, Afu3g13940, Afu4g03340, Afu5g07620 and A. niger CBS 513.88 : An13g02880, An09g04780	AN8504 cluster		0.0715923	0.873994	1.043	0.00120378	-0.837501	0.00981223	0.133908	0.75114
AN8496	AN8496	Has domain(s) with predicted metal ion binding activity	AN8504 cluster		-0.782743	0.000986462	-0.639946	0.0127776	-0.931889	4.0876e-05	-0.789093	0.00181873
AN8497	AN8497	Has domain(s) with predicted carbon-sulfur lyase activity and role in metabolic process	AN8504 cluster		-0.875479	3.61636e-09	-0.698705	2.45869e-07	0.841797	5.83557e-10	1.01857	6.83789e-13
AN8498	AN8498	Ortholog of A. nidulans FGSC A4 : AN5429, AN8310, AN11121, A. fumigatus Af293 : Afu3g01350 and A. niger CBS 513.88 : An12g08560, An09g02370, An13g02790, An13g02620	AN8504 cluster		-0.576826	2.66361e-07	-0.664745	1.4179e-10	0.459496	1.3958e-05	0.371578	0.00100349
AN8500	AN8500	Ortholog of A. niger CBS 513.88 : An13g02820, A. oryzae RIB40 : AO090009000060, Aspergillus wentii : Aspwe1_0122164, Aspergillus versicolor : Aspve1_0370452 and Aspergillus niger ATCC 1015 : 192087-mRNA	AN8504 cluster		-0.69886	2.35604e-06	-0.567249	5.59779e-05	1.52939	2.23316e-29	1.661	9.46791e-34
AN8499	AN8499	Ortholog(s) have heme binding, heme transporter activity, role in heme import across plasma membrane and integral component of membrane, plasma membrane localization	AN8504 cluster		-0.0643427	0.628763	0.266508	0.00718342	0.357787	0.00032892	0.688638	4.4982e-13
AN8501	AN8501	Ortholog of A. fumigatus Af293 : Afu1g01560, A. niger CBS 513.88 : An04g08620, A. oryzae RIB40 : AO090009000717 and Aspergillus wentii : Aspwe1_0046512, Aspwe1_0102964	AN8504 cluster		-0.0979649	0.665975	0.380601	0.0123149	1.27909	1.30779e-16	1.75765	1.16451e-31
AN8502	AN8502	Ortholog(s) have role in cellular response to drug	AN8504 cluster		-0.687545	0.174555	-0.0153955	0.976834	0.721858	0.081755	1.39401	0.000950561
AN8503	AN8503	Ortholog of A. niger CBS 513.88 : An13g03080, Aspergillus wentii : Aspwe1_0177501, Aspergillus versicolor : Aspve1_0046851 and Aspergillus sydowii : Aspsy1_0159981	AN8504 cluster		-0.265352	0.232747	0.352104	0.108595	-1.25728	6.81312e-11	-0.639828	0.00129057
AN8504	AN8504	Has domain(s) with predicted catalytic activity and role in metabolic process	AN8504 cluster	NRPS	-0.830333	0.488722	-0.595969	0.643559	-0.771046	0.474155	-0.536682	0.692895
number of genes in the cluster:				10
up-regulated genes in the cluster:					0		3		5		6
down-regulated genes in the cluster:					4		4		3		2
number of the studied genes:				10748
up-regulated genes (total):					1875		2482		2840		2487
down-regulated genes (total):					1985		2514		2643		2386
p-value for up-regulated genes (Fisher's exact test):					1		0.4166		0.09576		0.01338
p-value for down-regulated genes (Fisher's exact test):					0.09537		0.1877		0.4621		0.687
GENE ID	Gene name	Feature (AspGD)	Cluster	Key gene	log2FC	adj. p-value	log2FC	adj. p-value	log2FC	adj. p-value	log2FC	adj. p-value
					reference strain, Cd treated vs.	reference strain, untreated	DatfA mutant, Cd treated vs.	DatfA mutant, untreated	DatfA mutant, untreated vs.	reference strain, untreated	DatfA mutant, Cd treated vs.	reference strain, Cd treated
AN8513	tdiA	Putative single-module nonribosomal peptide synthetase (NRPS); member of the tdi (terrequinone A biosynthesis) gene cluster; transcriptionally regulated by LaeA	Terriquinone (tdi) cluster	NRPS	0.664642	NA	0.222702	0.912034	-0.215424	0.905701	-0.657364	0.699019
AN8514	tdiB	Asterriquinone prenyltransferase; member of the tdi gene cluster; required for terrequinone A production; catalyzes the reverse prenylation event during terrequinone A biosynthesis; lacks canonical prenyl diphosphate binding motif (D/N)DXXD	Terriquinone (tdi) cluster	DMATS type aromatic prenyltransferase	0.700706	0.528221	1.26632	0.144204	0.244984	0.825736	0.810603	0.371467
AN8518	tdiC	Similar to NADPH-dependent quinone reductases; member of the tdi (terrequinone A biosynthesis) gene cluster; transcriptionally regulated by LaeA	Terriquinone (tdi) cluster		1.05858	0.0136543	0.873857	0.124897	-2.34857	1.52545e-06	-2.5333	2.00944e-09
AN8516	tdiD	Putative aminotransferase; member of the tdi (terrequinone A biosynthesis) gene cluster; transcriptionally regulated by LaeA	Terriquinone (tdi) cluster		0	NA	0.774158	NA	0.695414	NA	1.67331	NA
AN8520	tdiE	Protein required for terrequinone A biosynthesis; member of the tdi (terrequinone A biosynthesis) gene cluster; transcriptionally regulated by LaeA	Terriquinone (tdi) cluster		-0.54292	0.672693	1.13209	0.148626	0.745696	0.440496	2.42071	0.00597184
number of genes in the cluster:				5
up-regulated genes in the cluster:					1		0		0		1
down-regulated genes in the cluster:					0		0		1		1
number of the studied genes:				10748
up-regulated genes (total):					1875		2482		2840		2487
down-regulated genes (total):					1985		2514		2643		2386
p-value for up-regulated genes (Fisher's exact test):					0.6166		1		1		0.7318
p-value for down-regulated genes (Fisher's exact test):					1		1		0.7562		0.715
GENE ID	Gene name	Feature (AspGD)	Cluster	Key gene	log2FC	adj. p-value	log2FC	adj. p-value	log2FC	adj. p-value	log2FC	adj. p-value
					reference strain, Cd treated vs.	reference strain, untreated	DatfA mutant, Cd treated vs.	DatfA mutant, untreated	DatfA mutant, untreated vs.	reference strain, untreated	DatfA mutant, Cd treated vs.	reference strain, Cd treated
AN5610	AN5610	Putative L-aminoadipate-semialdehyde dehydrogenase with a predicted role in lysine metabolism	AN5610 cluster	L-aminoadipate-semialdehyde-dehidrogenase	-0.446193	0.000354638	0.743866	9.76228e-11	0.314128	0.00995866	1.50419	2.13356e-40
AN10720	AN10720	Has domain(s) with predicted role in transmembrane transport and integral component of membrane localization	AN5610 cluster		0.225416	0.38222	0.181167	0.457899	-0.0163284	0.951659	-0.0605771	0.829035
AN5609	AN5609	Has domain(s) with predicted DNA-binding transcription factor activity, DNA-binding transcription factor activity, RNA polymerase II-specific, zinc ion binding activity and role in regulation of transcription, DNA-templated	AN5610 cluster	TF	0.00603008	0.98893	-0.362483	0.241716	0.182467	0.574498	-0.186047	0.598981
AN9474	AN9474	Ortholog of S. cerevisiae : YPL088W, A. fumigatus Af293 : Afu4g11260, A. niger CBS 513.88 : An15g04210, An04g05380 and A. oryzae RIB40 : AO090005000195, AO090003001095, AO090120000002	AN5610 cluster		-0.808403	3.42822e-07	-0.507735	0.00105755	-0.0941196	0.59249	0.206548	0.256396
AN5608	AN5608	Ortholog of A. nidulans FGSC A4 : AN4473, A. fumigatus Af293 : Afu4g07720, A. niger CBS 513.88 : An14g07030, An04g02100 and A. oryzae RIB40 : AO090023000800, AO090009000070	AN5610 cluster		0.928203	0.000152901	1.04779	6.43189e-07	0.470032	0.0658022	0.589617	0.00600267
AN9473	AN9473	Ortholog of A. fumigatus Af293 : Afu4g11270, A. niger CBS 513.88 : An04g05360, A. oryzae RIB40 : AO090003001094, Aspergillus wentii : Aspwe1_0102365 and Aspergillus sydowii : Aspsy1_0148568	AN5610 cluster		0.20308	0.185942	0.245303	0.0854041	-0.115027	0.446594	-0.0728045	0.6693
number of genes in the cluster:				6
up-regulated genes in the cluster:					1		2		1		2
down-regulated genes in the cluster:					2		1		0		0
number of the studied genes:				10748
up-regulated genes (total):					1875		2482		2840		2487
down-regulated genes (total):					1985		2514		2643		2386
p-value for up-regulated genes (Fisher's exact test):					0.6835		0.4203		0.8414		0.4214
p-value for down-regulated genes (Fisher's exact test):					0.307		0.7979		1		1
GENE ID	Gene name	Feature (AspGD)	Cluster	Key gene	log2FC	adj. p-value	log2FC	adj. p-value	log2FC	adj. p-value	log2FC	adj. p-value
					reference strain, Cd treated vs.	reference strain, untreated	DatfA mutant, Cd treated vs.	DatfA mutant, untreated	DatfA mutant, untreated vs.	reference strain, untreated	DatfA mutant, Cd treated vs.	reference strain, Cd treated
AN5318	AN5318	Putative non-ribosomal peptide synthetase; expression upregulated after exposure to farnesol	AN5318 cluster	NRPS	1.23263	3.21146e-25	1.15791	2.55351e-23	0.337949	0.00695888	0.26323	0.0414598
AN5317	AN5317	Ortholog of A. fumigatus Af293 : Afu6g00280, A. oryzae RIB40 : AO090003000248, AO090010000078, Neosartorya fischeri NRRL 181 : NFIA_047440 and Aspergillus versicolor : Aspve1_0031634	AN5318 cluster		0.0464775	0.868876	0.767417	0.000503846	-1.44213	4.97924e-12	-0.721188	0.000405021
AN5316	AN5316	Ortholog of Aspergillus versicolor : Aspve1_0031636 and Aspergillus sydowii : Aspsy1_0035792	AN5318 cluster		-1.02236	NA	-1.06596	NA	-1.085	NA	-1.1286	0.819467
AN5315	AN5315	Ortholog of A. nidulans FGSC A4 : AN7859, A. niger CBS 513.88 : An01g01450, A. oryzae RIB40 : AO090001000269, Neosartorya fischeri NRRL 181 : NFIA_044920 and Aspergillus wentii : Aspwe1_0166871	AN5318 cluster		-2.46005	0.00382475	-1.41187	0.00566848	1.46552	0.00533856	2.5137	0.00199307
AN5314	AN5314	Has domain(s) with predicted catalytic activity, pyridoxal phosphate binding activity and role in metabolic process	AN5318 cluster		-1.36228	0.0353557	0.897937	0.536209	-4.76652	3.01132e-06	-2.5063	0.004236
number of genes in the cluster:				5
up-regulated genes in the cluster:					1		2		2		2
down-regulated genes in the cluster:					2		1		2		2
number of the studied genes:				10748
up-regulated genes (total):					1875		2482		2840		2487
down-regulated genes (total):					1985		2514		2643		2386
p-value for up-regulated genes (Fisher's exact test):					0.6166		0.327		0.3972		0.328
p-value for down-regulated genes (Fisher's exact test):					0.2317		0.7362		0.3586		0.3083
GENE ID	Gene name	Feature (AspGD)	Cluster	Key gene	log2FC	adj. p-value	log2FC	adj. p-value	log2FC	adj. p-value	log2FC	adj. p-value
					reference strain, Cd treated vs.	reference strain, untreated	DatfA mutant, Cd treated vs.	DatfA mutant, untreated	DatfA mutant, untreated vs.	reference strain, untreated	DatfA mutant, Cd treated vs.	reference strain, Cd treated
AN9235	AN9235	Has domain(s) with predicted catalytic activity and role in metabolic process	AN11194 cluster		-1.16549	NA	0.785412	NA	-0.266336	NA	1.68456	NA
AN9234	AN9234	Predicted oxidoreductase; coregulated member of a dimethyl-allyl-tryptophan synthase (DMATS) type aromatic prenyltransferase- and NRPS-containing gene cluster	AN11194 cluster. AN9226 cluster		1.36642	NA	2.11238	0.12634	-0.251835	0.893672	0.494125	0.718611
AN9233	AN9233	Predicted O-methyltransferase; member of a dimethyl-allyl-tryptophan synthase (DMATS) type aromatic prenyltransferase- and NRPS-containing gene cluster	AN11194 cluster. AN9226 cluster		NA	NA	NA	NA	NA	NA	NA	NA
AN9232	AN9232	Predicted oxidoreductase; coregulated member of a dimethyl-allyl-tryptophan synthase (DMATS) type aromatic prenyltransferase- and NRPS-containing gene cluster	AN11194 cluster. AN9226 cluster		NA	NA	NA	NA	NA	NA	NA	NA
AN9231	AN9231	Predicted UDP-N-acetylmuramate dehydrogenase; coregulated member of a dimethyl-allyl-tryptophan synthase (DMATS) type aromatic prenyltransferase- and NRPS-containing gene cluster	AN11194 cluster. AN9226 cluster		0.173176	NA	1.93996	0.236496	-1.28469	0.461935	0.482087	0.778485
AN9230	AN9230	Predicted monooxygenase; coregulated member of a dimethyl-allyl-tryptophan synthase (DMATS) type aromatic prenyltransferase- and NRPS-containing gene cluster	AN11194 cluster. AN9226 cluster		-0.94421	NA	0	NA	-1.96864	NA	-1.1286	NA
AN11202	AN11202	Putative dimethyl-allyl-tryptophan synthase (DMATS) type aromatic prenyltransferase; coregulated member of a DMATS type aromatic prenyltransferase- and NRPS-containing gene cluster	AN11194 cluster. AN9226 cluster	DMATS-type aromatic prenyltransferase	0.0874544	NA	0.914759	0.62168	-0.996479	0.573065	-0.169174	0.933499
AN11194	AN11194	Putative dimethyl-allyl-tryptophan synthase (dmats) type aromatic prenyltransferase; coregulated member of a DMATS type aromatic prenyltransferase- and NRPS-containing gene cluster	AN11194 cluster. AN9226 cluster	DMATS-type aromatic prenyltransferase	NA	NA	NA	NA	NA	NA	NA	NA
AN11201	AN11201	Predicted oxidoreductase; coregulated member of a dimethyl-allyl-tryptophan synthase (DMATS) type aromatic prenyltransferase- and NRPS-containing gene cluster	AN11194 cluster. AN9226 cluster		-0.341855	NA	3.07516	0.116099	-3.88259	0.0340653	-0.465578	0.811764
AN11193	AN11193	Has domain(s) with predicted oxygen transporter activity; coregulated member of a dimethyl-allyl-tryptophan synthase (DMATS) type aromatic prenyltransferase- and NRPS-containing gene cluster	AN11194 cluster. AN9226 cluster		1.29998	NA	1.9199	0.343313	0.604848	0.815514	1.22477	0.547406
AN9227	AN9227	Predicted dioxygenase; coregulated member of a dimethyl-allyl-tryptophan synthase (DMATS) type aromatic prenyltransferase- and NRPS-containing gene cluster	AN11194 cluster. AN9226 cluster		1.70752	NA	0	NA	0	NA	-2.07805	NA
AN9226	AN9226	Putative nonribosomal peptide synthase (NRPS); coregulated member of a dimethyl-allyl-tryptophan synthase (DMATS) type aromatic prenyltransferase- and NRPS-containing gene cluster	AN11194 cluster. AN9226 cluster	NRPS	0.0432959	0.957614	0.851702	0.243737	-1.58859	0.0148934	-0.780187	0.216754
AN9225	CYP679A1	Putative cytochrome P450; coregulated member of a dimethyl-allyl-tryptophan synthase (DMATS) type aromatic prenyltransferase- and NRPS-containing gene cluster	AN11194 cluster. AN9226 cluster		0	NA	0.857614	NA	0	NA	0.794975	NA
AN9224	AN9224	Predicted monooxygenase; coregulated member of a dimethyl-allyl-tryptophan synthase (DMATS) type aromatic prenyltransferase- and NRPS-containing gene cluster	AN11194 cluster. AN9226 cluster		0.975747	NA	3.96254	0.0223529	-2.10575	0.290361	0.881045	0.554104
AN9223	AN9223	Putative demethylsterigmatocystin 6-O-methyltransferase; coregulatedmember of a dimethyl-allyl-tryptophan synthase (DMATS) type aromatic prenyltransferase- and NRPS-containing gene cluster	AN11194 cluster. AN9226 cluster		NA	NA	NA	NA	NA	NA	NA	NA
number of genes in the cluster:				15
up-regulated genes in the cluster:					0		1		0		0
down-regulated genes in the cluster:					0		0		2		0
number of the studied genes:				10748
up-regulated genes (total):					1875		2482		2840		2487
down-regulated genes (total):					1985		2514		2643		2386
p-value for up-regulated genes (Fisher's exact test):					1		0.9806		1		1
p-value for down-regulated genes (Fisher's exact test):					1		1		0.9147		1
GENE ID	Gene name	Feature (AspGD)	Cluster	Key gene	log2FC	adj. p-value	log2FC	adj. p-value	log2FC	adj. p-value	log2FC	adj. p-value
					reference strain, Cd treated vs.	reference strain, untreated	DatfA mutant, Cd treated vs.	DatfA mutant, untreated	DatfA mutant, untreated vs.	reference strain, untreated	DatfA mutant, Cd treated vs.	reference strain, Cd treated
AN9220	AN9220	Ortholog of A. fumigatus Af293 : Afu5g10320, A. oryzae RIB40 : AO090001000034, Neosartorya fischeri NRRL 181 : NFIA_076940 and Aspergillus versicolor : Aspve1_0038692	AN11191 cluster		-2.53357	NA	-0.961465	NA	-0.777124	NA	0.79498	0.832947
AN9219	AN9219	Has domain(s) with predicted role in transmembrane transport and integral component of membrane localization	AN11191 cluster		-1.97515	NA	0	NA	-2.03779	NA	0	NA
AN9218	CYP540D1	Putative sterol 14-demethylase with a predicted role in sterol metabolism; putative cytochrome P450 family	AN11191 cluster		-1.16546	NA	0	NA	-1.2281	NA	0	NA
AN11198	AN11198	Has domain(s) with predicted heme binding, oxidoreductase activity and role in oxidation-reduction process	AN11191 cluster		NA	NA	NA	NA	NA	NA	NA	NA
AN11199	AN11199	Predicted dihydrofolate reductase; member of the polyketide synthase (PKS) AN11191 gene cluster	AN11191 cluster		-2.7985	NA	0	NA	-2.86114	NA	0	NA
AN11191	AN11191	Putative polyketide synthase (PKS); gene cluster member with AN11199	AN11191 cluster	PKS	-0.253529	NA	0.703523	0.670361	-1.12083	0.451681	-0.163781	0.927386
number of genes in the cluster:				6
up-regulated genes in the cluster:					0		0		0		0
down-regulated genes in the cluster:					0		0		0		0
number of the studied genes:				10748
up-regulated genes (total):					1875		2482		2840		2487
down-regulated genes (total):					1985		2514		2643		2386
p-value for up-regulated genes (Fisher's exact test):					1		1		1		1
p-value for down-regulated genes (Fisher's exact test):					1		1		1		1
GENE ID	Gene name	Feature (AspGD)	Cluster	Key gene	log2FC	adj. p-value	log2FC	adj. p-value	log2FC	adj. p-value	log2FC	adj. p-value
					reference strain, Cd treated vs.	reference strain, untreated	DatfA mutant, Cd treated vs.	DatfA mutant, untreated	DatfA mutant, untreated vs.	reference strain, untreated	DatfA mutant, Cd treated vs.	reference strain, Cd treated
AN9185	AN9185	Protein of unknown function; transcript is induced by nitrate	No PKS/NRPS backbone 1		-0.354695	0.382229	-0.27459	0.724189	-3.47974	4.56319e-14	-3.39963	1.88862e-12
AN9184	AN9184	Ortholog(s) have plasma membrane localization	No PKS/NRPS backbone 1		-0.519735	0.00784038	-0.210658	0.343313	-2.63624	1.08246e-49	-2.32716	1.64606e-38
AN9183	bglR	Putative beta-glucosidase with a predicted role in polysaccharide degradation	No PKS/NRPS backbone 1		-0.32343	0.668571	1.74614	0.0718979	-3.35826	8.84596e-05	-1.28869	0.0586725
AN11190	AN11190	Ortholog(s) have role in cellular response to drug	No PKS/NRPS backbone 1		0.658126	0.0508614	2.61386	2.02409e-19	-0.582881	0.0983489	1.37285	3.34757e-07
AN11195	AN11195	Has domain(s) with predicted DNA binding, DNA-binding transcription factor activity, RNA polymerase II-specific, nucleic acid binding, zinc ion binding activity	No PKS/NRPS backbone 1	TF	0.276585	0.46607	1.02714	0.00125303	-0.706358	0.0371231	0.0441975	0.918311
AN9181	AN9181	Ortholog of A. nidulans FGSC A4 : AN8354, AN8970, A. fumigatus Af293 : Afu1g12440, Afu1g12460, Afu6g00230 and A. niger CBS 513.88 : An12g03270, An10g01010, An01g11070, An11g04060, An16g00990	No PKS/NRPS backbone 1		0.325517	0.552468	0.120634	0.848508	-0.53875	0.284952	-0.743633	0.116844
AN9180	AN9180	Putative transketolase; intracellular; protein abundance decreased by menadione stress	No PKS/NRPS backbone 1		-0.705591	4.66629e-13	0.735125	0.209614	-10.0845	9.3889e-141	-8.64374	5.0859e-177
AN9179	AN9179	Ortholog(s) have extracellular region localization	No PKS/NRPS backbone 1		-0.584996	0.00530468	0.552921	0.555305	-7.06578	1.62038e-33	-5.92786	4.99375e-35
number of genes in the cluster:				8
up-regulated genes in the cluster:					0		2		0		1
down-regulated genes in the cluster:					3		0		6		4
number of the studied genes:				10748
up-regulated genes (total):					1875		2482		2840		2487
down-regulated genes (total):					1985		2514		2643		2386
p-value for up-regulated genes (Fisher's exact test):					1		0.5837		1		0.8783
p-value for down-regulated genes (Fisher's exact test):					0.1703		1		0.003849		0.07863
GENE ID	Gene name	Feature (AspGD)	Cluster	Key gene	log2FC	adj. p-value	log2FC	adj. p-value	log2FC	adj. p-value	log2FC	adj. p-value
					reference strain, Cd treated vs.	reference strain, untreated	DatfA mutant, Cd treated vs.	DatfA mutant, untreated	DatfA mutant, untreated vs.	reference strain, untreated	DatfA mutant, Cd treated vs.	reference strain, Cd treated
AN9130	AN9130	Has domain(s) with predicted cholinesterase activity	AN9129 cluster		-0.851636	0.0102478	-0.522329	0.14357	-0.996543	0.00147919	-0.667236	0.0566292
AN9129	AN9129	Ortholog(s) have role in pathogenesis	AN9129 cluster	NRPS	3.25872	NA	0.216503	0.924837	1.88317	0.387578	-1.15904	0.531403
number of genes in the cluster:				2
up-regulated genes in the cluster:					0		0		0		0
down-regulated genes in the cluster:					1		0		1		0
number of the studied genes:				10748
up-regulated genes (total):					1875		2482		2840		2487
down-regulated genes (total):					1985		2514		2643		2386
p-value for up-regulated genes (Fisher's exact test):					1		1		1		1
p-value for down-regulated genes (Fisher's exact test):					0.3353		1		0.4314		1
GENE ID	Gene name	Feature (AspGD)	Cluster	Key gene	log2FC	adj. p-value	log2FC	adj. p-value	log2FC	adj. p-value	log2FC	adj. p-value
					reference strain, Cd treated vs.	reference strain, untreated	DatfA mutant, Cd treated vs.	DatfA mutant, untreated	DatfA mutant, untreated vs.	reference strain, untreated	DatfA mutant, Cd treated vs.	reference strain, Cd treated
AN3396	micA	Putative non-ribosomal peptide synthase (NRPS); responsible for microperfuranone biosynthesis; coregulated (with AN3394 and AN3395) secondary metabolism cluster member; transcript repressed by nitrogen limitation	Microperfuranone (mic) cluster	NRPS	-0.580586	1.80934e-05	-0.634192	9.48827e-07	0.1078	0.468553	0.0541935	0.76123
AN3395	AN3395	Protein of unknown function; coregulated (with micA/AN3396 and AN3394) secondary metabolism cluster member	Microperfuranone (mic) cluster		-0.929056	2.51627e-06	-0.696187	0.00369411	-1.87791	2.06741e-21	-1.64504	3.06641e-14
AN3394	CYP620D1	Putative cytochrome P450; putative O-methylsterigmatocystin oxidoreductase; coregulated (with micA/AN3396 and AN3395) secondary metabolism cluster member	Microperfuranone (mic) cluster		-0.9285	4.62455e-09	-0.537843	0.0222337	-3.15409	1.70653e-71	-2.76344	1.91805e-47
number of genes in the cluster:				3
up-regulated genes in the cluster:					0		0		0		0
down-regulated genes in the cluster:					3		3		2		2
number of the studied genes:				10748
up-regulated genes (total):					1875		2482		2840		2487
down-regulated genes (total):					1985		2514		2643		2386
p-value for up-regulated genes (Fisher's exact test):					1		1		1		1
p-value for down-regulated genes (Fisher's exact test):					0.006292		0.01279		0.1516		0.1259
GENE ID	Gene name	Feature (AspGD)	Cluster	Key gene	log2FC	adj. p-value	log2FC	adj. p-value	log2FC	adj. p-value	log2FC	adj. p-value
					reference strain, Cd treated vs.	reference strain, untreated	DatfA mutant, Cd treated vs.	DatfA mutant, untreated	DatfA mutant, untreated vs.	reference strain, untreated	DatfA mutant, Cd treated vs.	reference strain, Cd treated
AN3386	AN3386	Putative polyketide synthase; involved in secondary metabolite production	pki cluster	TF	0.078601	0.903004	0.65811	0.146775	-0.114631	0.837316	0.464878	0.330307
AN3385	AN3385	Putative transcription factor; predicted role in secondary metabolite production	pki cluster	PKS	-0.103732	0.742477	0.671434	0.000590719	0.820219	0.000159119	1.59538	3.17843e-15
AN3384	AN3384	Ortholog(s) have trichothecene 3-O-acetyltransferase activity and role in mycotoxin catabolic process	pki cluster		0.741437	0.0208135	1.22777	1.15696e-07	1.91452	2.61852e-12	2.40085	2.43104e-23
AN3383	AN3383	Has domain(s) with predicted role in transmembrane transport and integral component of membrane localization	pki cluster		0.758074	NA	1.79998	NA	0.695434	NA	1.73734	0.629106
AN3382	salA	Putative salicylate 1-monooxygenase; protein that confers resistance to the antifungal drug terbinafine	pki cluster		2.1735	NA	0	NA	0	NA	-2.54405	NA
AN3381	pkiC	Putative fatty acid synthetase subunit with a predicted role in cytosolic fatty acid formation; involved in secondary metabolite production	pki cluster		0.685301	0.000149819	0.884122	2.48641e-05	-1.4571	4.09299e-13	-1.25828	3.49245e-13
AN3380	pkiB	Putative fatty-acyl-CoA synthase with a predicted role in cytosolic fatty acid formation; involved in secondary metabolite production	pki cluster		0.917425	0.189299	0.850546	0.276431	-0.944211	0.219157	-1.01109	0.118074
AN3379	AN3379	Ortholog of A. fumigatus Af293 : Afu7g01170, A. niger CBS 513.88 : An01g01580, An12g01970, An01g00420, A. oryzae RIB40 : AO090010000104, AO090038000140 and Aspergillus wentii : Aspwe1_0112566	pki cluster		0.481319	0.412599	-0.707931	0.207001	-0.144058	0.811037	-1.33331	0.00957068
number of genes in the cluster:				8
up-regulated genes in the cluster:					2		3		2		2
down-regulated genes in the cluster:					0		0		1		2
number of the studied genes:				10748
up-regulated genes (total):					1875		2482		2840		2487
down-regulated genes (total):					1985		2514		2643		2386
p-value for up-regulated genes (Fisher's exact test):					0.4196		0.2746		0.6675		0.5849
p-value for down-regulated genes (Fisher's exact test):					1		1		0.8955		0.5594
GENE ID	Gene name	Feature (AspGD)	Cluster	Key gene	log2FC	adj. p-value	log2FC	adj. p-value	log2FC	adj. p-value	log2FC	adj. p-value
					reference strain, Cd treated vs.	reference strain, untreated	DatfA mutant, Cd treated vs.	DatfA mutant, untreated	DatfA mutant, untreated vs.	reference strain, untreated	DatfA mutant, Cd treated vs.	reference strain, Cd treated
AN10401	AN10401	Ortholog of A. nidulans FGSC A4 : AN6780, A. fumigatus Af293 : Afu7g01210, Aspergillus sydowii : Aspsy1_0029236, Aspsy1_0043488 and Aspergillus terreus NIH2624 : ATET_08673	AN10396 cluster		0.00470734	0.991285	0.153175	0.62839	0.182633	0.557096	0.331101	0.266386
AN10396	AN10396	Ortholog(s) have farnesyl-diphosphate farnesyltransferase activity, squalene synthase activity and role in ergosterol biosynthetic process, establishment or maintenance of cell polarity	AN10396 cluster	Farnesyl-diphosphate farnesyltransferase	0.0886497	0.711666	0.130298	0.542754	0.673132	0.000146375	0.71478	6.29084e-05
AN3375	AN3375	Ortholog of S. cerevisiae : CAJ1, A. fumigatus Af293 : Afu7g01230, A. niger CBS 513.88 : An12g01900, A. oryzae RIB40 : AO090010000203 and Aspergillus wentii : Aspwe1_0042504	AN10396 cluster		0.618139	3.03621e-08	0.399738	0.000304294	0.763436	1.1918e-12	0.545034	5.62083e-07
number of genes in the cluster:				3
up-regulated genes in the cluster:					1		1		2		2
down-regulated genes in the cluster:					0		0		0		0
number of the studied genes:				10748
up-regulated genes (total):					1875		2482		2840		2487
down-regulated genes (total):					1985		2514		2643		2386
p-value for up-regulated genes (Fisher's exact test):					0.4374		0.5452		0.1725		0.1358
p-value for down-regulated genes (Fisher's exact test):					1		1		1		1
GENE ID	Gene name	Feature (AspGD)	Cluster	Key gene	log2FC	adj. p-value	log2FC	adj. p-value	log2FC	adj. p-value	log2FC	adj. p-value
					reference strain, Cd treated vs.	reference strain, untreated	DatfA mutant, Cd treated vs.	DatfA mutant, untreated	DatfA mutant, untreated vs.	reference strain, untreated	DatfA mutant, Cd treated vs.	reference strain, Cd treated
AN3287	AN3287	Has domain(s) with predicted role in transmembrane transport and membrane localization	AN3273 cluster		0.973382	0.295606	-0.0844858	0.925795	1.369	0.0888895	0.311131	0.718458
AN3286	AN3286	Ortholog of A. nidulans FGSC A4 : AN10390, A. fumigatus Af293 : Afu4g01280, Afu5g00830, A. niger CBS 513.88 : An12g00980, An11g04090, An06g00150 and A. oryzae RIB40 : AO090138000050, AO090010000179	AN3273 cluster		1.84399	9.71744e-29	0.615059	5.64879e-05	1.64463	1.31713e-23	0.415696	0.00878556
AN3285	AN3285	Ortholog of A. fumigatus Af293 : Afu4g01270, Neosartorya fischeri NRRL 181 : NFIA_044020, Aspergillus versicolor : Aspve1_0066429 and Aspergillus fumigatus A1163 : AFUB_101760	AN3273 cluster		1.53291	3.98902e-10	1.13394	7.92867e-08	1.24162	3.15791e-07	0.842656	8.39287e-05
AN3284	AN3284	Ortholog of A. fumigatus Af293 : Afu4g07467, A. niger CBS 513.88 : An12g05240, An04g01840, A. oryzae RIB40 : AO090020000271, AO090103000196 and Aspergillus wentii : Aspwe1_0034590, Aspwe1_0053489	AN3273 cluster		0.950502	0.000544723	1.10549	5.05997e-05	-0.449201	0.157234	-0.294209	0.287772
AN3283	AN3283	Has domain(s) with predicted catalytic activity and role in nucleoside metabolic process	AN3273 cluster		0.706568	NA	1.75248	NA	-1.22813	NA	-0.18222	0.967061
AN3282	AN3282	Protein of unknown function	AN3273 cluster		0.371547	0.00929051	0.0965693	0.549037	-0.0501232	0.760782	-0.325101	0.0178603
AN3281	CYP567D1	Putative cytochrome P450	AN3273 cluster		0.397658	0.590374	1.13483	0.0933717	-1.08947	0.111101	-0.352294	0.615065
AN3280	AN3280	Has domain(s) with predicted DNA-binding transcription factor activity, RNA polymerase II-specific, zinc ion binding activity, role in regulation of transcription, DNA-templated and nucleus localization	AN3273 cluster	TF	0.675088	0.00189719	1.29297	1.80118e-11	0.105754	0.67268	0.723633	0.000213528
AN3279	AN3279	Has domain(s) with predicted oxidoreductase activity and role in metabolic process	AN3273 cluster		0.0697909	0.832121	0.661923	0.00330913	-0.0578346	0.844122	0.534297	0.0208901
AN3278	AN3278	Ortholog(s) have role in alkaloid biosynthetic process, ergot alkaloid biosynthetic process, secondary metabolite biosynthetic process	AN3273 cluster		-0.249464	0.148451	-0.160151	0.336119	0.203814	0.20348	0.293127	0.0678232
AN3277	AN3277	Has domain(s) with predicted magnesium ion binding, terpene synthase activity	AN3273 cluster	Terpene synthase	0.0959181	0.716754	-0.014893	0.959309	0.290705	0.162905	0.179894	0.428317
AN3276	AN3276	Putative Type II fatty acid synthase with a predicted role in mitochondrial fatty acid formation	AN3273 cluster		-0.656425	0.000510945	-0.372904	0.0469576	-0.0308856	0.890233	0.252635	0.221598
AN3275	CYP567E1	Putative cytochrome P450	AN3273 cluster		-0.220791	0.577584	0.700485	0.0269884	-0.524322	0.117181	0.396954	0.237259
AN10402	AN10402	Has domain(s) with predicted FAD binding, UDP-N-acetylmuramate dehydrogenase activity, flavin adenine dinucleotide binding, oxidoreductase activity, acting on CH-OH group of donors activity and role in oxidation-reduction process	AN3273 cluster		-0.208535	0.565004	0.216333	0.52308	-0.395606	0.200373	0.0292618	0.945004
AN10389	CYP654A1	Putative cytochrome P450	AN3273 cluster		3.83348	NA	2.21863	0.0933717	2.58953	0.163518	0.974681	0.456075
AN12188	AN12188	Has domain(s) with predicted catalytic activity, transferase activity and role in metabolic process	AN3273 cluster		-1.16547	NA	0.857614	NA	-1.22811	NA	0.794975	NA
AN3273	AN3273	Putative polketide synthase	AN3273 cluster	PKS	0.998414	NA	0.478784	NA	-0.292268	NA	-0.811897	0.773304
AN3272	CYP667A1	Putative cytochrome P450	AN3273 cluster		0.736328	NA	-1.88246	NA	0.550149	NA	-2.06863	0.591492
AN3271	AN3271	Protein of unknown function	AN3273 cluster		-1.16548	NA	1.73604	NA	-1.22812	NA	1.6734	NA
AN3270	AN3270	Has domain(s) with predicted role in transmembrane transport and integral component of membrane localization	AN3273 cluster		-0.696741	NA	-1.91877	0.171035	0.521029	0.703123	-0.700995	0.693687
AN3269	AN3269	Has domain(s) with predicted DNA binding, DNA-binding transcription factor activity, RNA polymerase II-specific, zinc ion binding activity and role in regulation of transcription, DNA-templated, transcription, DNA-templated	AN3273 cluster	TF	0.701199	0.055235	0.838883	0.0121369	-0.120954	0.778139	0.016729	0.969401
AN10388	AN10388	Has domain(s) with predicted FAD binding, UDP-N-acetylmuramate dehydrogenase activity, flavin adenine dinucleotide binding, oxidoreductase activity, oxidoreductase activity, acting on CH-OH group of donors activity	AN3273 cluster		0.445925	0.604713	0.602032	0.457423	-0.494456	0.548324	-0.338349	0.680318
number of genes in the cluster:				22
up-regulated genes in the cluster:					5		6		2		4
down-regulated genes in the cluster:					1		1		0		1
number of the studied genes:				10748
up-regulated genes (total):					1875		2482		2840		2487
down-regulated genes (total):					1985		2514		2643		2386
p-value for up-regulated genes (Fisher's exact test):					0.3357		0.3991		0.9896		0.7844
p-value for down-regulated genes (Fisher's exact test):					0.9889		0.9972		1		0.996
GENE ID	Gene name	Feature (AspGD)	Cluster	Key gene	log2FC	adj. p-value	log2FC	adj. p-value	log2FC	adj. p-value	log2FC	adj. p-value
					reference strain, Cd treated vs.	reference strain, untreated	DatfA mutant, Cd treated vs.	DatfA mutant, untreated	DatfA mutant, untreated vs.	reference strain, untreated	DatfA mutant, Cd treated vs.	reference strain, Cd treated
AN3257	AN3257	Protein of unknown function; predicted secondary metabolism gene cluster member	AN3252 cluster		0	NA	1.74613	NA	0	NA	1.68349	NA
AN3256	CYP648A1	Putative cytochrome P450; predicted secondary metabolism gene cluster member	AN3252 cluster		-1.16547	NA	0.857614	NA	-1.22811	NA	0.794975	NA
AN3255	AN3255	Predicted glutathione peroxidase; predicted secondary metabolism gene cluster member	AN3252 cluster		-1.06675	3.63071e-13	1.59117	1.24838e-16	-3.08582	6.72485e-66	-0.427896	0.00994594
AN3254	AN3254	Predicted transmembrane transporter; predicted secondary metabolism gene cluster member	AN3252 cluster		-0.592514	NA	1.75427	0.429361	-4.8197	0.0029488	-2.47292	0.134763
AN3253	CYP649A1	Putative cytochrome P450; predicted secondary metabolism gene cluster member	AN3252 cluster		0.428916	NA	2.11015	NA	-1.11503	NA	0.566202	0.823228
AN3252	AN3252	Protein with homology to entkaurene synthases; predicted backbone enzyme of a secondary metabolism gene cluster	AN3252 cluster	Entkaurene synthase	0.592734	0.66302	0.204894	0.885875	-0.0572628	0.96666	-0.445103	0.729486
number of genes in the cluster:				6
up-regulated genes in the cluster:					0		1		0		0
down-regulated genes in the cluster:					1		0		2		1
number of the studied genes:				10748
up-regulated genes (total):					1875		2482		2840		2487
down-regulated genes (total):					1985		2514		2643		2386
p-value for up-regulated genes (Fisher's exact test):					1		0.7932		1		1
p-value for down-regulated genes (Fisher's exact test):					0.7064		1		0.4563		0.7783
GENE ID	Gene name	Feature (AspGD)	Cluster	Key gene	log2FC	adj. p-value	log2FC	adj. p-value	log2FC	adj. p-value	log2FC	adj. p-value
					reference strain, Cd treated vs.	reference strain, untreated	DatfA mutant, Cd treated vs.	DatfA mutant, untreated	DatfA mutant, untreated vs.	reference strain, untreated	DatfA mutant, Cd treated vs.	reference strain, Cd treated
AN3228	pkfE	Predicted prenyltransferase; aspernidine A secondary metabolism gene cluster member	pkf cluster		-0.161928	NA	-0.0745646	0.97507	-1.3094	0.453657	-1.22204	0.517856
AN3227	pkfD	Predicted monooxygenase; aspernidine A secondary metabolism gene cluster member	pkf cluster		1.11853	0.316897	-0.518021	0.639095	0.852594	0.425251	-0.783961	0.460185
AN3226	pkfC	Has domain protein; aspernidine A secondary metabolism gene cluster member; protein levels decrease in response to farnesol	pkf cluster		-0.11348	0.66936	-0.0468564	0.866274	1.50735	4.80087e-15	1.57397	2.99285e-16
AN3225	CYP631B1	Putative cytochrome P450; aspernidine A secondary metabolism gene cluster member	pkf cluster		-0.289431	0.578106	-0.55506	0.182934	1.0823	0.00607261	0.816672	0.0531572
number of genes in the cluster:				4
up-regulated genes in the cluster:					0		0		2		1
down-regulated genes in the cluster:					0		0		0		0
number of the studied genes:				10748
up-regulated genes (total):					1875		2482		2840		2487
down-regulated genes (total):					1985		2514		2643		2386
p-value for up-regulated genes (Fisher's exact test):					1		1		0.2859		0.6511
p-value for down-regulated genes (Fisher's exact test):					1		1		1		1
GENE ID	Gene name	Feature (AspGD)	Cluster	Key gene	log2FC	adj. p-value	log2FC	adj. p-value	log2FC	adj. p-value	log2FC	adj. p-value
					reference strain, Cd treated vs.	reference strain, untreated	DatfA mutant, Cd treated vs.	DatfA mutant, untreated	DatfA mutant, untreated vs.	reference strain, untreated	DatfA mutant, Cd treated vs.	reference strain, Cd treated
AN2924	AN2924	Putative nonribosomal peptide synthetase (NRPS)-like enzyme	AN2924 cluster	NRPS	1.55403	1.01941e-20	1.98758	2.87608e-08	-4.50914	4.19283e-44	-4.07559	6.21913e-92
AN2923	AN2923	Ortholog of A. nidulans FGSC A4 : AN10601, A. fumigatus Af293 : Afu2g17770, Afu8g00650, A. niger CBS 513.88 : An11g02090, An01g01000 and A. oryzae RIB40 : AO090020000174, AO090103000301	AN2924 cluster		-0.749213	2.07594e-07	-0.443605	0.370219	-6.15785	8.1663e-104	-5.85225	5.68648e-77
AN2922	AN2922	Ortholog of A. nidulans FGSC A4 : AN1515, AN7536, A. niger CBS 513.88 : An12g10030, A. oryzae RIB40 : AO090701000305, AO090102000038, AO090124000043 and Aspergillus wentii : Aspwe1_0030521	AN2924 cluster		-0.327628	0.0559398	0.593369	0.125569	-5.80498	1.1211e-96	-4.88398	3.54595e-95
AN2921	AN2921	Ortholog of A. nidulans FGSC A4 : AN4177, AN12488, A. fumigatus Af293 : Afu8g00600, A. niger CBS 513.88 : An03g00920, An02g01430, A. oryzae RIB40 : AO090010000696 and Aspergillus wentii : Aspwe1_0029035	AN2924 cluster		-2.28327	4.01391e-08	-1.68234	0.251815	-5.17647	9.0861e-14	-4.57555	0.000101475
number of genes in the cluster:				4
up-regulated genes in the cluster:					1		1		0		0
down-regulated genes in the cluster:					2		0		4		4
number of the studied genes:				10748
up-regulated genes (total):					1875		2482		2840		2487
down-regulated genes (total):					1985		2514		2643		2386
p-value for up-regulated genes (Fisher's exact test):					0.5356		0.6502		1		1
p-value for down-regulated genes (Fisher's exact test):					0.1577		1		0.00365		0.002424
GENE ID	Gene name	Feature (AspGD)	Cluster	Key gene	log2FC	adj. p-value	log2FC	adj. p-value	log2FC	adj. p-value	log2FC	adj. p-value
					reference strain, Cd treated vs.	reference strain, untreated	DatfA mutant, Cd treated vs.	DatfA mutant, untreated	DatfA mutant, untreated vs.	reference strain, untreated	DatfA mutant, Cd treated vs.	reference strain, Cd treated
AN2623	aatA	Isopenicillin-N N-acyltransferase; null produces reduced levels of penicillin; partially redundant with aatB	Penicillin cluster		-0.263662	0.575067	0.0678344	0.8624	1.26613	9.38787e-05	1.59763	7.83507e-07
AN2622	ipnA	Isopenicillin-N synthase with a role in penicillin biosynthesis; expression is negatively regulated by glucose and acidic pH	Penicillin cluster		-1.3205	0.000631485	-1.05473	0.000463894	1.40037	5.4701e-06	1.66615	3.30805e-06
AN2621	acvA	Delta-(L-alpha-aminoadipyl)-L-cysteinyl-D-valine synthetase, nonribosomal peptide synthase, the first enzyme of the penicillin biosynthesis pathway	Penicillin cluster	NRPS	0.620363	0.576143	-1.86007	0.0156547	1.96856	0.0158856	-0.511874	0.619155
number of genes in the cluster:				3
up-regulated genes in the cluster:					0		0		3		2
down-regulated genes in the cluster:					1		2		0		0
number of the studied genes:				10748
up-regulated genes (total):					1875		2482		2840		2487
down-regulated genes (total):					1985		2514		2643		2386
p-value for up-regulated genes (Fisher's exact test):					1		1		0.01843		0.1358
p-value for down-regulated genes (Fisher's exact test):					0.4581		0.1385		1		1
GENE ID	Gene name	Feature (AspGD)	Cluster	Key gene	log2FC	adj. p-value	log2FC	adj. p-value	log2FC	adj. p-value	log2FC	adj. p-value
					reference strain, Cd treated vs.	reference strain, untreated	DatfA mutant, Cd treated vs.	DatfA mutant, untreated	DatfA mutant, untreated vs.	reference strain, untreated	DatfA mutant, Cd treated vs.	reference strain, Cd treated
AN9007	CYP548D1	Putative cytochrome P450; predicted secondary metabolism gene cluster member	AN9005 cluster		1.98695	1.80038e-07	2.06469	5.78964e-10	0.389159	0.400903	0.466895	0.1678
AN9006	AN9006	Protein of unknown function; predicted secondary metabolism gene cluster member	AN9005 cluster		-0.791401	0.214986	-0.209816	0.834712	-2.07569	0.00107414	-1.4941	0.0334716
AN9005	AN9005	Putative polyketide synthase (PKS); predicted backbone enzyme of a secondary metabolism gene cluster	AN9005 cluster	PKS	-0.460145	0.0383701	0.642397	0.10511	-3.95778	1.16198e-39	-2.85524	9.02314e-28
AN9004	AN9004	Predicted monooxygenase	AN9005 cluster		-0.00762207	0.967484	1.32843	2.73667e-29	-0.112475	0.434626	1.22358	4.15109e-25
AN9003	AN9003	Has domain(s) with predicted zinc ion binding activity	AN9005 cluster		0.463342	0.00173073	0.386941	0.0120455	-0.827968	1.0365e-08	-0.904369	5.45989e-11
AN9002	AN9002	Predicted monooxygenase; predicted secondary metabolism gene cluster member	AN9005 cluster		0.188797	0.873994	-1.06597	0.656992	-4.36139	0.00371953	-5.61616	0.000164034
number of genes in the cluster:				6
up-regulated genes in the cluster:					2		3		0		1
down-regulated genes in the cluster:					1		0		4		4
number of the studied genes:				10748
up-regulated genes (total):					1875		2482		2840		2487
down-regulated genes (total):					1985		2514		2643		2386
p-value for up-regulated genes (Fisher's exact test):					0.2821		0.1404		1		0.7939
p-value for down-regulated genes (Fisher's exact test):					0.7064		1		0.03544		0.02465
GENE ID	Gene name	Feature (AspGD)	Cluster	Key gene	log2FC	adj. p-value	log2FC	adj. p-value	log2FC	adj. p-value	log2FC	adj. p-value
					reference strain, Cd treated vs.	reference strain, untreated	DatfA mutant, Cd treated vs.	DatfA mutant, untreated	DatfA mutant, untreated vs.	reference strain, untreated	DatfA mutant, Cd treated vs.	reference strain, Cd treated
AN8910	AN8910	Putative polyketide synthase (PKS)	AN8910 cluster	PKS	-0.110334	0.823333	-0.097461	0.921105	-3.78568	4.46236e-13	-3.77281	5.63661e-13
AN8909	AN8909	Protein of unknown function	AN8910 cluster		1.33494	NA	-1.88524	NA	0.552935	NA	-2.66725	0.438577
AN8908	AN8908	Ortholog of A. fumigatus Af293 : Afu8g00630, A. niger CBS 513.88 : An07g00510, A. oryzae RIB40 : AO090009000111 and Aspergillus sydowii : Aspsy1_0162791, Aspsy1_0212146	AN8910 cluster		-0.342132	0.542871	-0.646345	0.170053	0.140419	0.785274	-0.163794	0.784633
AN12240	AN12240	Ortholog of Aspergillus versicolor : Aspve1_0089632	AN8910 cluster		-0.16026	0.688217	-0.157386	0.690173	-0.4871	0.135834	-0.484226	0.155499
AN8907	AN8907	Putative C-4 sterol methyl oxidase with a predicted role in sterol metabolism	AN8910 cluster		0.0286067	0.825446	-0.0434217	0.712873	-0.306261	0.000937291	-0.37829	4.32441e-05
AN8906	AN8906	Ortholog of A. fumigatus Af293 : Afu8g02420, A. niger CBS 513.88 : An03g06440, A. oryzae RIB40 : AO090010000669 and Aspergillus wentii : Aspwe1_0122188	AN8910 cluster		0.0587656	0.74267	-0.227845	0.101332	0.260461	0.0566708	-0.0261497	0.886686
AN8905	CYP537B1	Putative cytochrome P450	AN8910 cluster		0.13221	0.322688	-0.406616	0.000219754	0.505225	3.57809e-06	-0.0336011	0.823998
number of genes in the cluster:				7
up-regulated genes in the cluster:					0		0		1		0
down-regulated genes in the cluster:					0		1		2		2
number of the studied genes:				10748
up-regulated genes (total):					1875		2482		2840		2487
down-regulated genes (total):					1985		2514		2643		2386
p-value for up-regulated genes (Fisher's exact test):					1		1		0.8834		1
p-value for down-regulated genes (Fisher's exact test):					1		0.8452		0.5449		0.4829
GENE ID	Gene name	Feature (AspGD)	Cluster	Key gene	log2FC	adj. p-value	log2FC	adj. p-value	log2FC	adj. p-value	log2FC	adj. p-value
					reference strain, Cd treated vs.	reference strain, untreated	DatfA mutant, Cd treated vs.	DatfA mutant, untreated	DatfA mutant, untreated vs.	reference strain, untreated	DatfA mutant, Cd treated vs.	reference strain, Cd treated
AN1592	AN1592	Putative GGPP-synthase; member of the PbcR-activated diterpene cluster	AN1594 cluster		-0.532223	0.508385	0.00189453	1	-1.6985	0.0212285	-1.16438	0.145313
AN1593	AN1593	Putative 3-hydroxy-3-methylglutaryl-coenzyme A (HMG-CoA) reductase isozyme with a predicted role in sterol metabolism; member of the PbcR-activated diterpene cluster	AN1594 cluster		0.227242	0.306092	0.815092	3.30728e-06	0.0225734	0.923358	0.610424	0.000637622
AN1594	AN1594	Protein with homology to entkaurene synthases; member of the PbcR-activated diterpene cluster	AN1594 cluster	entkaurene synthases	-0.0958065	NA	0	1	-4.98986	0.00197499	-4.99823	0.00231971
AN1595	AN1595	Putative elongation factor 1-gamma; member of the PbcR-activated diterpene cluster	AN1594 cluster		-0.0760394	0.936664	-0.000123435	1	-1.13316	0.132519	-1.05725	0.172238
AN1596	AN1596	Putative short-chain dehydrogenase; member of the PbcR-activated diterpene cluster	AN1594 cluster		0.778902	9.83909e-07	0.817586	1.43461e-07	-0.345261	0.0382524	-0.306578	0.0671354
AN1597	AN1597	Protein of unknown function; member of the PbcR-activated diterpene cluster	AN1594 cluster		0.198898	0.294142	0.251609	0.149428	-0.228378	0.197599	-0.175667	0.333207
AN1598	CYP503B1	Putative cytochrome P450; member of the PbcR-activated diterpene cluster	AN1594 cluster		-0.0295416	0.954527	0.347979	0.455694	-1.20529	0.00167744	-0.827768	0.0291038
AN1599	pbcR	Zn(II)(2)Cys(6)-type transcription factor; responsible for the production of the diterpene compound, ent-pimara-8(14),15-diene; member of the PbcR-activated diterpene cluster	AN1594 cluster	TF	0.28785	0.199233	0.16583	0.59454	-2.00416	1.7894e-19	-2.12618	4.82591e-24
number of genes in the cluster:				8
up-regulated genes in the cluster:					1		2		0		1
down-regulated genes in the cluster:					0		0		5		3
number of the studied genes:				10748
up-regulated genes (total):					1875		2482		2840		2487
down-regulated genes (total):					1985		2514		2643		2386
p-value for up-regulated genes (Fisher's exact test):					1		0.5837		1		0.8783
p-value for down-regulated genes (Fisher's exact test):					1		1		0.02541		0.2533
GENE ID	Gene name	Feature (AspGD)	Cluster	Key gene	log2FC	adj. p-value	log2FC	adj. p-value	log2FC	adj. p-value	log2FC	adj. p-value
					reference strain, Cd treated vs.	reference strain, untreated	DatfA mutant, Cd treated vs.	DatfA mutant, untreated	DatfA mutant, untreated vs.	reference strain, untreated	DatfA mutant, Cd treated vs.	reference strain, Cd treated
AN1678	AN1678	Putative transcription factor; predicted role in secondary metabolite production	AN1680 cluster	TF	0.822117	0.00190308	0.745252	0.00259096	0.0499651	0.880422	-0.0268995	0.938043
AN1679	AN1679	Putative oxidoreductase with a predicted role in carbohydrate metabolism	AN1680 cluster		0.846873	0.00442758	1.22227	1.01226e-05	-0.29012	0.39696	0.0852763	0.806709
AN1680	AN1680	Putative nonribosomal peptide synthase (NRPS)-like enzyme	AN1680 cluster	NRPS	0.197351	0.540663	-0.418078	0.1204	0.23447	0.409184	-0.380959	0.172238
AN1681	AN1681	Has domain(s) with predicted role in transmembrane transport and integral component of membrane localization	AN1680 cluster		0.707753	0.440538	0.421768	0.652864	-0.183396	0.853867	-0.469381	0.593424
number of genes in the cluster:				4
up-regulated genes in the cluster:					2		2		0		0
down-regulated genes in the cluster:					0		0		0		0
number of the studied genes:				10748
up-regulated genes (total):					1875		2482		2840		2487
down-regulated genes (total):					1985		2514		2643		2386
p-value for up-regulated genes (Fisher's exact test):					0.1429		0.23		1		1
p-value for down-regulated genes (Fisher's exact test):					1		1		1		1
GENE ID	Gene name	Feature (AspGD)	Cluster	Key gene	log2FC	adj. p-value	log2FC	adj. p-value	log2FC	adj. p-value	log2FC	adj. p-value
					reference strain, Cd treated vs.	reference strain, untreated	DatfA mutant, Cd treated vs.	DatfA mutant, untreated	DatfA mutant, untreated vs.	reference strain, untreated	DatfA mutant, Cd treated vs.	reference strain, Cd treated
AN1784	AN1784	Putative polyketide synthase; predicted secondary metabolism gene cluster member	AN1784 cluster	PKS	1.55981	0.116285	3.10399	0.000199978	-0.240399	0.85244	1.30378	0.057922
AN1785	AN1785	Protein of unknown function; predicted secondary metabolism gene cluster member; coregulated with the PKS AN1784	AN1784 cluster		-0.2037	NA	0.79833	NA	-0.266339	NA	0.73569	0.846103
AN1786	AN1786	Predicted monooxygenase; predicted secondary metabolism gene cluster member; coregulated with the PKS AN1784	AN1784 cluster		0.438286	0.701923	0.983978	0.336261	-0.698324	0.513939	-0.152632	0.894747
AN1787	AN1787	Predicted UDP-N-acetylmuramate dehydrogenase; predicted secondary metabolism gene cluster member; coregulated with the PKS AN1784	AN1784 cluster		-0.975359	0.272903	-0.878432	0.295221	-0.153757	0.860204	-0.0568301	0.961655
number of genes in the cluster:				4
up-regulated genes in the cluster:					0		1		0		0
down-regulated genes in the cluster:					0		0		0		0
number of the studied genes:				10748
up-regulated genes (total):					1875		2482		2840		2487
down-regulated genes (total):					1985		2514		2643		2386
p-value for up-regulated genes (Fisher's exact test):					1		0.6502		1		1
p-value for down-regulated genes (Fisher's exact test):					1		1		1		1
GENE ID	Gene name	Feature (AspGD)	Cluster	Key gene	log2FC	adj. p-value	log2FC	adj. p-value	log2FC	adj. p-value	log2FC	adj. p-value
					reference strain, Cd treated vs.	reference strain, untreated	DatfA mutant, Cd treated vs.	DatfA mutant, untreated	DatfA mutant, untreated vs.	reference strain, untreated	DatfA mutant, Cd treated vs.	reference strain, Cd treated
AN1792	AN1792	Has domain(s) with predicted hydrolase activity, hydrolase activity, acting on ester bonds activity and role in lipid metabolic process	AN1793 cluster		-1.69409	NA	-1.68306	0.316965	1.30303	0.435274	1.31407	0.576215
AN1794	CYP682D1	Putative cytochrome P450; expression reduced after exposure to farnesol	AN1793 cluster		-0.207475	0.133931	-0.418305	0.000220591	1.45543	2.43541e-39	1.2446	1.12225e-28
AN1793	AN1793	Has domain(s) with predicted magnesium ion binding, terpene synthase activity	AN1793 cluster	Terpene synthase	0.00424701	0.995359	-0.106663	0.777898	1.92942	9.70142e-08	1.81851	2.57218e-07
AN1795	AN1795	Ortholog(s) have cobalt ion transmembrane transporter activity, zinc ion transmembrane transporter activity	AN1793 cluster		-0.321068	0.0172958	-0.36257	0.00407974	0.531296	1.43673e-05	0.489794	9.36272e-05
AN1796	AN1796	Ortholog(s) have role in DNA repair, GPI anchor biosynthetic process, hyphal growth and endoplasmic reticulum localization	AN1793 cluster		0.501509	8.44788e-05	0.290373	0.0208769	0.17997	0.184371	-0.0311663	0.849767
number of genes in the cluster:				5
up-regulated genes in the cluster:					1		2		3		3
down-regulated genes in the cluster:					1		1		0		0
number of the studied genes:				10748
up-regulated genes (total):					1875		2482		2840		2487
down-regulated genes (total):					1985		2514		2643		2386
p-value for up-regulated genes (Fisher's exact test):					0.6166		0.327		0.119		0.08482
p-value for down-regulated genes (Fisher's exact test):					0.6398		0.7362		1		1
GENE ID	Gene name	Feature (AspGD)	Cluster	Key gene	log2FC	adj. p-value	log2FC	adj. p-value	log2FC	adj. p-value	log2FC	adj. p-value
					reference strain, Cd treated vs.	reference strain, untreated	DatfA mutant, Cd treated vs.	DatfA mutant, untreated	DatfA mutant, untreated vs.	reference strain, untreated	DatfA mutant, Cd treated vs.	reference strain, Cd treated
AN2030	AN2030	Predicted oxidoreductase; predicted secondary metabolism gene cluster member	pkh cluster		0.671177	NA	-1.62864	0.401137	2.74528	0.178731	0.445462	0.869349
AN2031	AN2031	Protein of unknown function; predicted secondary metabolism gene cluster member	pkh cluster		NA	NA	NA	NA	NA	NA	NA	NA
AN2032	pkhA	Putative polyketide synthase; involved in secondary metabolite production	pkh cluster	PKS	-0.573258	0.0998926	0.263044	0.555938	-1.56722	3.70915e-06	-0.730916	0.0423743
AN2033	AN2033	Predicted monooxygenase; predicted secondary metabolism gene cluster member	pkh cluster		0.111058	0.684951	0.913017	1.48542e-06	0.172543	0.455713	0.974501	3.32617e-07
AN2034	AN2034	Protein of unknown function; predicted secondary metabolism gene cluster member	pkh cluster		0.758066	NA	-1.97021	NA	1.59967	NA	-1.1286	NA
AN2035	pkhB	Putative polyketide synthase; involved in secondary metabolite production	pkh cluster	PKS	0.291997	0.6752	0.706588	0.2022	-0.0602129	0.928405	0.354378	0.560699
AN2036	AN2036	Putative transcription factor; predicted role in secondary metabolite production; predicted secondary metabolism gene cluster member	pkh cluster	TF	-0.472133	NA	-0.666712	0.765614	-2.13689	0.147533	-2.33147	0.173048
AN2037	AN2037	Predicted NAD binding oxidoreductase; predicted secondary metabolism gene cluster member	pkh cluster		-0.169935	0.331139	0.120948	0.483491	-0.269104	0.0798135	0.0217786	0.919315
AN2038	AN2038	Predicted oxidoreductase; predicted secondary metabolism gene cluster member	pkh cluster		0.86098	NA	-0.129368	0.961143	-0.174193	0.935818	-1.16454	0.555874
number of genes in the cluster:				9
up-regulated genes in the cluster:					0		1		0		1
down-regulated genes in the cluster:					0		0		1		1
number of the studied genes:				10748
up-regulated genes (total):					1875		2482		2840		2487
down-regulated genes (total):					1985		2514		2643		2386
p-value for up-regulated genes (Fisher's exact test):					1		0.906		1		0.9065
p-value for down-regulated genes (Fisher's exact test):					1		1		0.9212		0.8957
GENE ID	Gene name	Feature (AspGD)	Cluster	Key gene	log2FC	adj. p-value	log2FC	adj. p-value	log2FC	adj. p-value	log2FC	adj. p-value
					reference strain, Cd treated vs.	reference strain, untreated	DatfA mutant, Cd treated vs.	DatfA mutant, untreated	DatfA mutant, untreated vs.	reference strain, untreated	DatfA mutant, Cd treated vs.	reference strain, Cd treated
AN10289	AN10289	Putative dimethyl-allyl-tryptophan synthase (DMATS)-type aromatic prenyltransferase; transcript is induced by nitrate	AN10289 cluster	DMATS-type aromatic prenyltransferase	-0.1469	0.854359	-0.0464258	0.961349	-0.785054	0.222279	-0.68458	0.314781
AN10295	AN10295	Has domain(s) with predicted DNA binding activity	AN10289 cluster	TF	0.198623	0.413516	0.530797	0.00984999	-0.527892	0.00990534	-0.195718	0.402702
AN2346	AN2346	Protein of unknown function	AN10289 cluster		0.400362	0.796549	-0.740335	0.632947	-0.545332	0.693732	-1.68603	0.21236
AN12125	AN12125	Protein of unknown function	AN10289 cluster		0	NA	-2.52054	NA	2.15	NA	0	NA
AN2347	CYP504E4P	Putative cytochrome P450; possibly a pseudogene	AN10289 cluster		-0.978554	NA	0.798253	NA	-1.04119	NA	0.735613	0.844348
number of genes in the cluster:				5
up-regulated genes in the cluster:					0		1		0		0
down-regulated genes in the cluster:					0		0		1		0
number of the studied genes:				10748
up-regulated genes (total):					1875		2482		2840		2487
down-regulated genes (total):					1985		2514		2643		2386
p-value for up-regulated genes (Fisher's exact test):					1		0.731		1		1
p-value for down-regulated genes (Fisher's exact test):					1		1		0.7562		1
GENE ID	Gene name	Feature (AspGD)	Cluster	Key gene	log2FC	adj. p-value	log2FC	adj. p-value	log2FC	adj. p-value	log2FC	adj. p-value
					reference strain, Cd treated vs.	reference strain, untreated	DatfA mutant, Cd treated vs.	DatfA mutant, untreated	DatfA mutant, untreated vs.	reference strain, untreated	DatfA mutant, Cd treated vs.	reference strain, Cd treated
AN2396	AN2396	Has domain(s) with predicted NAD binding. catalytic activity. coenzyme binding. oxidoreductase activity. acting on the aldehyde or oxo group of donors. NAD or NADP as acceptor activity	AN10297 cluster		0.355241	0.0749794	0.260766	0.18525	-0.119168	0.576676	-0.213643	0.287457
AN2397	AN2397	Has domain(s) with predicted NAD binding, catalytic activity, coenzyme binding, oxidoreductase activity, acting on the aldehyde or oxo group of donors, NAD or NADP as acceptor activity	AN10297 cluster		0.307486	0.0842654	0.941429	1.02188e-09	-0.361094	0.035681	0.272849	0.10019
AN2398	AN2398	Ortholog of A. fumigatus Af293 : Afu8g06960, Aspergillus flavus NRRL 3357 : AFL2T_05473, Neosartorya fischeri NRRL 181 : NFIA_099650 and Aspergillus versicolor : Aspve1_0026050	AN10297 cluster		0.35102	0.616409	0.706965	0.457424	-2.42045	0.0010956	-2.06451	0.00128964
AN2399	AN2399	Has domain(s) with predicted O-methyltransferase activity	AN10297 cluster		NA	NA	NA	NA	NA	NA	NA	NA
AN2400	AN2400	Protein of unknown function	AN10297 cluster		1.74318	NA	0	NA	0	NA	-2.11372	NA
AN12115	AN12115	Protein of unknown function	AN10297 cluster		NA	NA	NA	NA	NA	NA	NA	NA
AN12116	AN12116	Protein of unknown function	AN10297 cluster		1.66121	NA	0.919057	NA	0.601057	NA	-0.141093	0.95906
AN2402	AN2402	Has domain(s) with predicted role in transmembrane transport and integral component of membrane localization	AN10297 cluster		0	NA	-0.104173	NA	0.695422	NA	0.794975	NA
AN10300	AN10300	Has domain(s) with predicted oxidoreductase activity and role in metabolic process	AN10297 cluster	TF	-0.52696	0.0749454	0.410918	0.132993	-0.299608	0.296718	0.63827	0.0185891
AN10297	AN10297	Has domain(s) with predicted DNA-binding transcription factor activity, RNA polymerase II-specific, zinc ion binding activity, role in regulation of transcription, DNA-templated and nucleus localization	AN10297 cluster	NRPS	-0.967813	0.00947685	-0.592632	0.169692	-1.25296	0.000423688	-0.877784	0.0324803
AN2404	AN2404	Protein with similarity to nonribosomal peptide synthases (NRPS-like); putative acyl CoA synthetase with an NAD-binding domain	AN10297 cluster		0.056089	0.798289	1.17219	0.0461265	-9.25447	9.5881e-96	-8.13837	6.4374e-155
AN2405	AN2405	Ortholog of A. fumigatus Af293 : Afu8g05810, A. niger CBS 513.88 : An15g04670, A. oryzae RIB40 : AO090005000570, Aspergillus wentii : Aspwe1_0118486 and Aspergillus sydowii : Aspsy1_0039439	AN10297 cluster		-0.473981	0.008273	-0.266166	0.136783	0.0812328	0.67769	0.289048	0.116867
AN12119	AN12119	Ortholog of A. fumigatus Af293 : Afu2g14390, A. oryzae RIB40 : AO090023000066, Neosartorya fischeri NRRL 181 : NFIA_089560, Aspergillus wentii : Aspwe1_0046658 and Aspergillus versicolor : Aspve1_0025636	AN10297 cluster		-0.0665778	0.748589	0.0425403	0.835473	0.3087	0.0502797	0.417818	0.00747578
AN2406	AN2406	Ortholog of A. nidulans FGSC A4 : AN12185, A. fumigatus Af293 : Afu2g14380, A. niger CBS 513.88 : An03g05760 and Neosartorya fischeri NRRL 181 : NFIA_089550	AN10297 cluster		0.102441	0.440275	-0.159968	0.166895	0.729109	1.35072e-12	0.4667	1.0175e-05
AN2407	AN2407	Ortholog(s) have intracellular localization	AN10297 cluster		-2.49677	2.11121e-06	-1.48516	0.0211809	-1.796	0.000118692	-0.784386	0.303506
AN11337	AN11337	Has domain(s) with predicted role in isoprenoid biosynthetic process	AN10297 cluster		0.490851	0.00120437	0.55477	0.000244582	-1.57658	1.33601e-28	-1.51266	2.51606e-27
		Ortholog of A. niger CBS 513.88 : An18g01250, Aspergillus tubingensis : Asptu1_0114551, Aspergillus brasiliensis : Aspbr1_0322983 and Aspergillus kawachii : Aspka1_0173401
number of genes in the cluster:				16
up-regulated genes in the cluster:					1		3		1		3
down-regulated genes in the cluster:					3		1		6		4
number of the studied genes:				10748
up-regulated genes (total):					1875		2482		2840		2487
down-regulated genes (total):					1985		2514		2643		2386
p-value for up-regulated genes (Fisher's exact test):					0.9536		0.7512		0.9927		0.7526
p-value for down-regulated genes (Fisher's exact test):					0.5891		0.986		0.1788		0.4893
GENE ID	Gene name	Feature (AspGD)	Cluster	Key gene	log2FC	adj. p-value	log2FC	adj. p-value	log2FC	adj. p-value	log2FC	adj. p-value
					reference strain, Cd treated vs.	reference strain, untreated	DatfA mutant, Cd treated vs.	DatfA mutant, untreated	DatfA mutant, untreated vs.	reference strain, untreated	DatfA mutant, Cd treated vs.	reference strain, Cd treated
AN2545	easA	Putative nonribosomal peptide synthetase; emericellamide synthetase; required for emericellamide biosynthesis; emericellamide (eas) biosynthetic gene cluster member	Emericellamide (eas) cluster	NRPS	-0.720303	0.113134	-0.417405	0.375898	-1.12354	0.00619615	-0.820638	0.0612538
AN2546	AN2546	Predicted glycosylphosphatidylinositol (GPI)-anchored protein; embedded within the emericellamide (eas) biosynthetic gene cluster	Emericellamide (eas) cluster		-0.35832	0.26921	0.467437	0.153641	-1.44799	3.94542e-07	-0.62223	0.0390647
AN2547	easB	Putative polyketide synthase; required for emericellamide biosynthesis	Emericellamide (eas) cluster	PKS	0.100733	0.859607	0.110731	0.841711	-1.38084	0.000579541	-1.37084	0.000776836
AN2548	easC	Putative acyltransferase; required for emericellamide biosynthesis; emericellamide (eas) biosynthetic gene cluster member	Emericellamide (eas) cluster		0.142613	0.807002	0.0193479	0.975341	-1.39232	0.00106184	-1.51558	0.000399685
AN2549	easD	Putative acyl-CoA ligase; required for emericellamide biosynthesis; emericellamide (eas) biosynthetic gene cluster member	Emericellamide (eas) cluster		-0.341568	0.201336	-0.759128	0.00129813	-0.602242	0.0105712	-1.0198	1.09503e-05
number of genes in the cluster:				5
up-regulated genes in the cluster:					0		0		0		0
down-regulated genes in the cluster:					0		1		5		4
number of the studied genes:				10748
up-regulated genes (total):					1875		2482		2840		2487
down-regulated genes (total):					1985		2514		2643		2386
p-value for up-regulated genes (Fisher's exact test):					1		1		1		1
p-value for down-regulated genes (Fisher's exact test):					1		0.7362		0.0008966		0.00997
GENE ID	Gene name	Feature (AspGD)	Cluster	Key gene	log2FC	adj. p-value	log2FC	adj. p-value	log2FC	adj. p-value	log2FC	adj. p-value
					reference strain, Cd treated vs.	reference strain, untreated	DatfA mutant, Cd treated vs.	DatfA mutant, untreated	DatfA mutant, untreated vs.	reference strain, untreated	DatfA mutant, Cd treated vs.	reference strain, Cd treated
AN9244	AN9244	Putative nonribosomal peptide synthase	Austinol (aus) cluster 1	NRPS	0.0827432	0.903382	0.649389	0.276845	-1.49825	0.00419683	-0.931605	0.0735161
AN9245	AN9245	Has domain(s) with predicted catalytic activity and role in metabolic process	Austinol (aus) cluster 1		1.74226	NA	0.857615	NA	0	NA	-1.15102	NA
AN9246	ausE	Predicted dioxygenase; required for austinol and dehydroaustinol biosynthesis	Austinol (aus) cluster 1		1.29714	NA	-0.395211	0.829869	-0.548388	0.71702	-2.24074	0.0875072
AN9247	ausF	Protein required for normal levels of austinol and dehydroaustinol production	Austinol (aus) cluster 1		2.04525	NA	1.7589	NA	-1.22814	NA	-1.51448	0.568266
AN9248	CYP650B1	Putative cytochrome P450; required for austinol and dehydroaustinol biosynthesis	Austinol (aus) cluster 1		0.84206	NA	-1.96992	NA	0.766369	NA	-2.04561	0.390486
AN9249	ausH	Protein required for austinol and dehydroaustinol biosynthesis	Austinol (aus) cluster 1		0.805909	0.209264	1.22552	0.0441018	-0.681254	0.308892	-0.261639	0.700875
AN9250	AN9250	Ortholog(s) have role in alkaloid biosynthetic process, ergot alkaloid biosynthetic process, secondary metabolite biosynthetic process	Austinol (aus) cluster 1		0.00789083	0.990116	3.1204	1.46247e-17	-0.651331	0.164209	2.46118	2.72062e-13
AN9251	CYP650A1	Putative cytochrome P450	Austinol (aus) cluster 1		0.0474765	NA	2.64644	0.0555228	-1.20772	0.451135	1.39124	0.27699
AN9252	AN9252	Ortholog of Aspergillus glaucus : Aspgl1_0083762, Neosartorya fischeri NRRL 181 : NFIA_101490, NFIA_101510, Aspergillus wentii : Aspwe1_0735355 and Aspergillus versicolor : Aspve1_0046577	Austinol (aus) cluster 1		-3.10199	NA	0.925782	NA	-1.33868	NA	2.6891	0.290603
AN9253	CYP651A1	Putative cytochrome P450; required for austinol and dehydroaustinol biosynthesis	Austinol (aus) cluster 1		0.407539	NA	-0.0879137	0.968502	0.0594386	0.974089	-0.436014	0.820952
number of genes in the cluster:				10
up-regulated genes in the cluster:					0		2		0		1
down-regulated genes in the cluster:					0		0		1		0
number of the studied genes:				10748
up-regulated genes (total):					1875		2482		2840		2487
down-regulated genes (total):					1985		2514		2643		2386
p-value for up-regulated genes (Fisher's exact test):					1		0.7104		1		0.9281
p-value for down-regulated genes (Fisher's exact test):					1		1		0.9406		1
GENE ID	Gene name	Feature (AspGD)	Cluster	Key gene	log2FC	adj. p-value	log2FC	adj. p-value	log2FC	adj. p-value	log2FC	adj. p-value
					reference strain, Cd treated vs.	reference strain, untreated	DatfA mutant, Cd treated vs.	DatfA mutant, untreated	DatfA mutant, untreated vs.	reference strain, untreated	DatfA mutant, Cd treated vs.	reference strain, Cd treated
AN11820	AN11820	Putative nonribosomal peptide sythetase (NRPS)-like enzyme	AN9291 (AN11820) cluster	NRPS	1.14344	0.172779	1.10911	0.208354	-0.6574	0.497584	-0.691729	0.381686
AN11821	AN11821	Has domain(s) with predicted role in transmembrane transport and integral component of membrane localization	AN9291 (AN11820) cluster		0.967896	0.17482	1.90697	0.00954404	-1.23559	0.125534	-0.296514	0.687257
AN9292	AN9292	Ortholog(s) have role in positive regulation of secondary metabolite biosynthetic process, regulation of secondary metabolic process, secondary metabolite biosynthetic process	AN9291 (AN11820) cluster	TF	0.564593	0.0159421	1.22314	1.76203e-07	-0.972932	7.52231e-05	-0.314383	0.174621
AN9293	AN9293	Has domain(s) with predicted DNA-binding transcription factor activity, RNA polymerase II-specific, zinc ion binding activity, role in regulation of transcription, DNA-templated and nucleus localization	AN9291 (AN11820) cluster	TF	0.0320946	0.877928	0.0668521	0.730913	-0.466514	0.00207251	-0.431756	0.00441758
AN9294	AN9294	Has domain(s) with predicted role in transmembrane transport and integral component of membrane localization	AN9291 (AN11820) cluster		0.431646	0.00384734	0.838309	1.63526e-09	-0.4402	0.00304975	-0.0335375	0.860143
number of genes in the cluster:				5
up-regulated genes in the cluster:					2		3		0		0
down-regulated genes in the cluster:					0		0		3		1
number of the studied genes:				10748
up-regulated genes (total):					1875		2482		2840		2487
down-regulated genes (total):					1985		2514		2643		2386
p-value for up-regulated genes (Fisher's exact test):					0.2114		0.08438		1		1
p-value for down-regulated genes (Fisher's exact test):					1		1		0.0992		0.715
GENE ID	Gene name	Feature (AspGD)	Cluster	Key gene	log2FC	adj. p-value	log2FC	adj. p-value	log2FC	adj. p-value	log2FC	adj. p-value
					reference strain, Cd treated vs.	reference strain, untreated	DatfA mutant, Cd treated vs.	DatfA mutant, untreated	DatfA mutant, untreated vs.	reference strain, untreated	DatfA mutant, Cd treated vs.	reference strain, Cd treated
AN9313	CYP58D1	Putative cytochrome P450; secondary metabolism gene cluster member with AN9314	AN9314 cluster		1.23579	NA	-1.06597	NA	-1.74728	NA	-4.04904	0.04537
AN9314	AN9314	Protein with homology to entkaurene synthases; prediction backbone enzyme of a secondary metabolite biosynthesis gene cluster	AN9314 cluster	Entkaurene synthase	-0.855735	0.388517	1.75326	0.404333	-5.9307	4.18307e-05	-3.3217	0.0179679
number of genes in the cluster:				2
up-regulated genes in the cluster:					0		0		0		0
down-regulated genes in the cluster:					0		0		1		2
number of the studied genes:				10748
up-regulated genes (total):					1875		2482		2840		2487
down-regulated genes (total):					1985		2514		2643		2386
p-value for up-regulated genes (Fisher's exact test):					1		1		1		1
p-value for down-regulated genes (Fisher's exact test):					1		1		0.4314		0.04927
GENE ID	Gene name	Feature (AspGD)	Cluster	Key gene	log2FC	adj. p-value	log2FC	adj. p-value	log2FC	adj. p-value	log2FC	adj. p-value
					reference strain, Cd treated vs.	reference strain, untreated	DatfA mutant, Cd treated vs.	DatfA mutant, untreated	DatfA mutant, untreated vs.	reference strain, untreated	DatfA mutant, Cd treated vs.	reference strain, Cd treated
AN1247	AN1247	Has domain(s) with predicted integral component of membrane localization	AN1242 cluster		-0.493391	1.3617e-05	0.0380701	0.796933	-0.297016	0.00856332	0.234445	0.0492746
AN1246	pgkA	Putative phosphoglycerate kinase with a predicted role in gluconeogenesis and glycolysis; intracellular, menadione stress-induced protein; promoter activity is greater on gluconeogenic than on glycolytic carbon sources	AN1242 cluster		-0.418552	0.000280607	-0.215321	0.0711324	0.122703	0.32206	0.325934	0.00472461
AN1245	sem1	Has domain(s) with predicted role in mRNA export from nucleus, proteasome assembly and proteasome regulatory particle, lid subcomplex localization	AN1242 cluster		0.205255	0.16519	0.169141	0.233296	0.304505	0.0211995	0.268391	0.0493089
AN1244	AN1244	Ortholog of S. cerevisiae : YKR018C, A. fumigatus Af293 : Afu1g10360, A. niger CBS 513.88 : An08g02280, Aspergillus wentii : Aspwe1_0036570 and Aspergillus sydowii : Aspsy1_0025503	AN1242 cluster		-0.00797788	0.962661	0.417442	0.000344671	-0.452206	0.000106688	-0.0267858	0.867051
AN1243	AN1243	Has domain(s) with predicted role in transmembrane transport and integral component of membrane localization	AN1242 cluster		-0.578106	0.000956912	-0.803196	2.13818e-06	-0.276331	0.11542	-0.501421	0.00547371
AN1242	AN1242	Putative nonribosomal peptide synthase (NRPS) involved in nidulanin A biosynthesis; predicted backbone enzyme of the secondary metabolite gene cluster	AN1242 cluster	NRPS	-1.05734	2.11667e-06	0.0569024	0.899418	-3.20043	9.35902e-35	-2.08618	3.23443e-15
number of genes in the cluster:				6
up-regulated genes in the cluster:					0		1		1		3
down-regulated genes in the cluster:					4		1		3		2
number of the studied genes:				10748
up-regulated genes (total):					1875		2482		2840		2487
down-regulated genes (total):					1985		2514		2643		2386
p-value for up-regulated genes (Fisher's exact test):					1		0.7932		0.8414		0.1411
p-value for down-regulated genes (Fisher's exact test):					0.01267		0.7979		0.163		0.3986
GENE ID	Gene name	Feature (AspGD)	Cluster	Key gene	log2FC	adj. p-value	log2FC	adj. p-value	log2FC	adj. p-value	log2FC	adj. p-value
					reference strain, Cd treated vs.	reference strain, untreated	DatfA mutant, Cd treated vs.	DatfA mutant, untreated	DatfA mutant, untreated vs.	reference strain, untreated	DatfA mutant, Cd treated vs.	reference strain, Cd treated
AN1036	afoG	Putative polyketide synthase; required for asperfuranone biosynthesis; transcriptionally induced by scrP overexpression	Asperfuranone (afo) cluster	PKS	1.66795	NA	1.38637	NA	0.695432	NA	0.413855	0.921557
AN11287	AN11287	Protein of unknown function	Asperfuranone (afo) cluster		NA	NA	NA	NA	NA	NA	NA	NA
AN1035	afoF	Putative FAD/FMN-dependent oxygenase; required for asperfuranone biosynthesis	Asperfuranone (afo) cluster		-1.02446	NA	-0.0766236	NA	-0.223114	NA	0.724726	0.821067
AN1034	afoE	Putative polyketide synthase; required for asperfuranone biosynthesis; transcriptionally induced by scrP overexpression	Asperfuranone (afo) cluster	PKS	-0.254288	0.596551	0.168017	0.712693	-0.17058	0.695077	0.251725	0.578062
AN1033	afoD	Putative salicylate hydroxylase; required for asperfuranone biosynthesis; transcriptionally induced by scrP overexpression	Asperfuranone (afo) cluster		-1.31222	0.0711987	-0.0991763	0.910851	-0.592639	0.378168	0.620404	0.444364
AN1032	afoC	Putative oxidoreductase; required for asperfuranone biosynthesis	Asperfuranone (afo) cluster		-1.17495	0.307674	-1.55336	0.0940308	0.732371	0.431765	0.353968	0.793824
AN1031	afoB	Putative efflux pump; involved in asperfuranone biosynthesis	Asperfuranone (afo) cluster		0.10333	0.934164	0.159913	0.922996	-1.81402	0.0973202	-1.75743	0.100389
AN1030	AN1030	Has domain(s) with predicted oxidoreductase activity, transferase activity, transferring acyl groups other than amino-acyl groups activity and role in oxidation-reduction process	Asperfuranone (afo) cluster		-1.16549	NA	1.78483	NA	-0.26634	NA	2.68399	0.433028
AN1029	afoA	Protein with homology to CtnR, citrinin biosynthesis transcriptional activator; contains a Zn(2)Cys(6) domain; involved in asperfuranone biosynthesis; overexpression induces expression of the asperfuranone biosynthesis gene cluster	Asperfuranone (afo) cluster	TF	-0.316291	0.835186	0.544127	0.653909	-0.0427368	0.973384	0.817681	0.509095
number of genes in the cluster:				9
up-regulated genes in the cluster:					0		0		0		0
down-regulated genes in the cluster:					0		0		0		0
number of the studied genes:				10748
up-regulated genes (total):					1875		2482		2840		2487
down-regulated genes (total):					1985		2514		2643		2386
p-value for up-regulated genes (Fisher's exact test):					1		1		1		1
p-value for down-regulated genes (Fisher's exact test):					1		1		1		1
GENE ID	Gene name	Feature (AspGD)	Cluster	Key gene	log2FC	adj. p-value	log2FC	adj. p-value	log2FC	adj. p-value	log2FC	adj. p-value
					reference strain, Cd treated vs.	reference strain, untreated	DatfA mutant, Cd treated vs.	DatfA mutant, untreated	DatfA mutant, untreated vs.	reference strain, untreated	DatfA mutant, Cd treated vs.	reference strain, Cd treated
AN0660	furA	Putative allantoin transporter; transcript is induced by allantoin and by uric acid and is repressed by ammonium	No PKS/NRPS backbone 3		-0.24607	0.308827	-0.0572858	0.833484	0.369347	0.0805336	0.558131	0.00743318
AN0659	AN0659	Ortholog of A. fumigatus Af293 : Afu1g13200, A. niger CBS 513.88 : An08g06230, A. oryzae RIB40 : AO090012001040, Aspergillus wentii : Aspwe1_0051321 and Aspergillus sydowii : Aspsy1_0065853	No PKS/NRPS backbone 3		0.0321318	0.870226	-0.352706	0.0123257	0.35386	0.011789	-0.0309772	0.872009
AN11278	AN11278	Ortholog(s) have role in cristae formation, membrane organization and MICOS complex, mitochondrial crista junction localization	No PKS/NRPS backbone 3		-0.533862	6.04518e-06	-0.558361	3.98417e-07	1.13043	1.39959e-25	1.10593	6.00449e-24
AN0658	AN0658	Has domain(s) with predicted DNA binding, DNA-binding transcription factor activity, copper ion binding activity, role in regulation of transcription, DNA-templated and host cell nucleus, nucleus localization	No PKS/NRPS backbone 3	TF	-0.0552395	0.825689	-0.0564139	0.801315	0.40425	0.0240812	0.403076	0.0266793
AN0657	AN0657	Ortholog(s) have mitochondrial outer membrane localization	No PKS/NRPS backbone 3		-0.464764	0.0093662	-1.05934	1.36249e-11	0.635234	6.8591e-05	0.0406542	0.862457
AN0656	AN0656	Protein expressed at increased levels during osmoadaptation; contains conserved UbiE, methylase domain involved in ubiquinone/menaquinone biosynthesis	No PKS/NRPS backbone 3		2.94314	1.4236e-16	5.86924	1.27894e-65	-0.354701	0.421434	2.5714	1.32187e-15
AN0655	sepM	Protein with homology to Schizosaccharomyces pombe Cdc14p, a component of the septation initiation network (SIN)-complex	No PKS/NRPS backbone 3		-0.905017	7.06216e-06	-0.510833	0.00966084	0.0969351	0.667757	0.491119	0.0186765
AN0654	AN0654	Ortholog(s) have farnesyltranstransferase activity and role in terpenoid biosynthetic process	No PKS/NRPS backbone 3		0.0996607	0.474105	0.774049	2.93633e-14	0.192855	0.100495	0.867244	1.949e-17
AN0653	AN0653	Ortholog of S. cerevisiae : YPL199C, Neosartorya fischeri NRRL 181 : NFIA_012370, Aspergillus wentii : Aspwe1_0172006, Aspergillus versicolor : Aspve1_0253586 and Aspergillus clavatus NRRL 1 : ACLA_022320	No PKS/NRPS backbone 3	TF	0.3535	0.00973365	0.127899	0.359278	0.400803	0.00178514	0.175202	0.202499
number of genes in the cluster:				9
up-regulated genes in the cluster:					2		2		5		6
down-regulated genes in the cluster:					3		4		0		0
number of the studied genes:				10748
up-regulated genes (total):					1875		2482		2840		2487
down-regulated genes (total):					1985		2514		2643		2386
p-value for up-regulated genes (Fisher's exact test):					0.4832		0.6516		0.06079		0.006646
p-value for down-regulated genes (Fisher's exact test):					0.2221		0.1369		1		1
GENE ID	Gene name	Feature (AspGD)	Cluster	Key gene	log2FC	adj. p-value	log2FC	adj. p-value	log2FC	adj. p-value	log2FC	adj. p-value
					reference strain, Cd treated vs.	reference strain, untreated	DatfA mutant, Cd treated vs.	DatfA mutant, untreated	DatfA mutant, untreated vs.	reference strain, untreated	DatfA mutant, Cd treated vs.	reference strain, Cd treated
AN0609	sidI	Triacetylfusarinine C (TAFC) biosynthetic enoyl-CoA hydratase; siderophore biosynthetic enzyme	AN0607 (sidC) cluster		1.29103	0.000410221	-0.108444	0.78554	2.66877	5.60797e-16	1.26929	5.14736e-05
AN0608	AN0608	Ortholog(s) have role in N',N'',N'''-triacetylfusarinine C biosynthetic process, ergosterol biosynthetic process, siderophore biosynthetic process and peroxisome localization	AN0607 (sidC) cluster		-0.764145	0.0197917	-0.386106	0.213418	0.296132	0.35042	0.674171	0.0340477
AN0607	sidC	Non-ribosomal peptide synthetase; similar to ferrichrome peptide synthetases; involved in ferricrocin (FC) siderophore biosynthesis	AN0607 (sidC) cluster	NRPS	-1.47729	6.84623e-29	-1.14156	2.57967e-16	-1.16894	1.65612e-19	-0.833213	6.31931e-09
number of genes in the cluster:				3
up-regulated genes in the cluster:					1		0		1		2
down-regulated genes in the cluster:					2		1		1		1
number of the studied genes:				10748
up-regulated genes (total):					1875		2482		2840		2487
down-regulated genes (total):					1985		2514		2643		2386
p-value for up-regulated genes (Fisher's exact test):					0.4374		1		0.6017		0.1358
p-value for down-regulated genes (Fisher's exact test):					0.0897		0.5504		0.5712		0.5291
GENE ID	Gene name	Feature (AspGD)	Cluster	Key gene	log2FC	adj. p-value	log2FC	adj. p-value	log2FC	adj. p-value	log2FC	adj. p-value
					reference strain, Cd treated vs.	reference strain, untreated	DatfA mutant, Cd treated vs.	DatfA mutant, untreated	DatfA mutant, untreated vs.	reference strain, untreated	DatfA mutant, Cd treated vs.	reference strain, Cd treated
AN0533	AN0533	Putative transcription factor; predicted role in secondary metabolite production	pkdA cluster	TF	0.958886	0.466824	-1.48511	0.229915	0.794922	0.51506	-1.64907	0.182988
AN0532	AN0532	Predicted DDE1 transposon-related ORF	pkdA cluster		0.363662	0.558514	-0.180559	0.774003	0.164238	0.783054	-0.379983	0.512881
AN0531	AN0531	Protein of unknown function	pkdA cluster		-0.944561	0.22168	-0.786882	0.239672	0.307132	0.659922	0.464811	0.579727
AN0530	AN0530	Has domain(s) with predicted FAD binding, oxidoreductase activity and role in metabolic process	pkdA cluster		-0.137711	NA	1.61938	0.295599	0.75792	0.710396	2.51501	0.14741
AN0529	AN0529	Ortholog of A. nidulans FGSC A4 : AN7899/dbaE, AN9159, AN2031, AN1032/afoC, A. fumigatus Af293 : Afu8g00910 and A. niger CBS 513.88 : An03g01180, An09g01790, An03g01810	pkdA cluster		3.80626	1.11379e-06	4.28252	2.95161e-12	0.424506	0.702569	0.900762	0.0165523
AN0528	AN0528	Has domain(s) with predicted role in transmembrane transport and integral component of membrane localization	pkdA cluster		-1.51563	NA	-1.15088	0.59369	-2.07254	0.180433	-1.7078	0.402702
AN0527	AN0527	Ortholog of A. oryzae RIB40 : AO090001000396 and Aspergillus flavus NRRL 3357 : AFL2T_09050	pkdA cluster		NA	NA	NA	NA	NA	NA	NA	NA
AN0526	AN0526	Has domain(s) with predicted 2-oxoglutarate-dependent dioxygenase activity, iron ion binding, oxidoreductase activity and role in oxidation-reduction process	pkdA cluster		0	NA	0.857614	NA	0	NA	0.794975	NA
AN0525	AN0525	Has domain(s) with predicted oxidoreductase activity	pkdA cluster		2.31506	0.00847703	4.25705	2.25375e-06	-0.811593	0.520254	1.13039	0.0568746
AN0524	AN0524	Ortholog of A. niger CBS 513.88 : An16g06480, Aspergillus brasiliensis : Aspbr1_0048090, Aspergillus flavus NRRL 3357 : AFL2T_09053 and Aspergillus versicolor : Aspve1_0042193	pkdA cluster		1.43231	NA	-1.54686	NA	0.339574	NA	-2.63959	0.21858
AN0523	pkdA	Putative polyketide synthase; involved in secondary metabolite production	pkdA cluster	PKS	0.441618	0.776375	1.87442	0.11415	-0.461223	0.754156	0.971583	0.413556
number of genes in the cluster:				11
up-regulated genes in the cluster:					2		2		0		1
down-regulated genes in the cluster:					0		0		0		0
number of the studied genes:				10748
up-regulated genes (total):					1875		2482		2840		2487
down-regulated genes (total):					1985		2514		2643		2386
p-value for up-regulated genes (Fisher's exact test):					0.5966		0.7606		1		0.9448
p-value for down-regulated genes (Fisher's exact test):					1		1		1		1
GENE ID	Gene name	Feature (AspGD)	Cluster	Key gene	log2FC	adj. p-value	log2FC	adj. p-value	log2FC	adj. p-value	log2FC	adj. p-value
					reference strain, Cd treated vs.	reference strain, untreated	DatfA mutant, Cd treated vs.	DatfA mutant, untreated	DatfA mutant, untreated vs.	reference strain, untreated	DatfA mutant, Cd treated vs.	reference strain, Cd treated
AN10023	mdpL	Member of the monodictyphenone (mdp) secondary metabolite biosynthesis gene cluster; required for monodictyphenone biosynthesis	Monodictyphenone (mdp) cluster		-0.157754	NA	0.205986	0.927288	-0.998178	0.573974	-0.634438	0.748821
AN10044	mdpK	Putative oxidoreductase; member of the monodictyphenone (mdp) secondary metabolite biosynthesis gene cluster; required for monodictyphenone biosynthesis	Monodictyphenone (mdp) cluster		1.17063	NA	0	NA	-1.22812	NA	-2.50292	NA
AN10038	mdpJ	Putative glutathione S transferase; member of the monodictyphenone (mdp) secondary metabolite biosynthesis gene cluster; required for monodictyphenone biosynthesis	Monodictyphenone (mdp) cluster		1.64864	NA	0	NA	0	NA	-2.01918	NA
AN10035	mdpI	Putative AMP-binding CoA ligase; member of the monodictyphenone (mdp) secondary metabolite biosynthesis gene cluster	Monodictyphenone (mdp) cluster		-0.203492	NA	0.793705	NA	-1.22602	NA	-0.228824	0.953426
AN10022	mdpH	Protein with homology to the DUF 1772 superfamily; member of the monodictyphenone (mdp)secondary metabolite biosynthesis gene cluster	Monodictyphenone (mdp) cluster		0.687265	NA	-1.0046	NA	0.634084	NA	-1.05778	0.753416
AN0150	mdpG	Polyketide synthase; member of the monodictyphenone secondary metabolite biosynthesis gene cluster; required for the synthesis of the xanthones (shamixanthone and epishamixanthone), emodin, arugosins, monodictyphenone, and related compounds	Monodictyphenone (mdp) cluster	PKS	0.571	0.0812951	0.618527	0.166693	-1.93262	2.01901e-07	-1.8851	4.21441e-09
AN0149	mdpF	Putative zinc-dependent hydrolase; member of the monodictyphenone (mdp) secondary metabolite biosynthesis gene cluster	Monodictyphenone (mdp) cluster		-0.148709	0.855001	-0.716132	0.364089	-1.10172	0.0870625	-1.66914	0.01419
AN0148	mdpE	C6 zinc finger transcription factor similar to AflR; member of the monodictyphenone secondary metabolite biosynthesis gene cluster; required for synthesis of monodictyphenone and related compounds but not prenyl xanthones	Monodictyphenone (mdp) cluster	TF	-0.12126	0.917736	-1.09568	0.410216	-1.44279	0.13912	-2.41721	0.0318462
AN0147	mdpD	Flavin-containing monooxygenase; member of the monodictyphenone secondary metabolite biosynthesis gene cluster; responsible for conversion of monodictyphenone to the prenyl xanthones, shamixanthone and epishamixanthone	Monodictyphenone (mdp) cluster		0.26113	NA	-1.61147	NA	-0.149823	NA	-2.02242	0.421442
AN0146	mdpC	Protein with homology to versicolorin ketoreductase; member of the (mdp) monodictyphenone secondary metabolite biosynthesis gene cluster; required for monodictyphenone biosynthesis	Monodictyphenone (mdp) cluster		0.301103	0.668956	0.752682	0.380172	-2.18178	0.00173169	-1.7302	0.00476818
AN10049	mdpB	Protein with homology to scytalone dehydratase; member of the monodictyphenone (mdp) secondary metabolite biosynthesis gene cluster; transcript is induced by nitrate	Monodictyphenone (mdp) cluster		-0.367381	0.727231	-0.672059	0.584705	-1.34522	0.143798	-1.6499	0.11016
AN10021	mdpA	Regulatory protein; member of the monodictyphenone secondary metabolite biosynthesis gene cluster; similar to aflatoxin coactivator aflJ and O-methyltransferases; required for biosynthesis of monodictyphenone, a prenyl xanthone precursor	Monodictyphenone (mdp) cluster	Transcription coactivator	-1.35093	3.09802e-06	-1.1542	0.00391807	-2.37572	1.89544e-15	-2.17899	2.04282e-09
number of genes in the cluster:				12
up-regulated genes in the cluster:					0		0		0		0
down-regulated genes in the cluster:					1		1		3		5
number of the studied genes:				10748
up-regulated genes (total):					1875		2482		2840		2487
down-regulated genes (total):					1985		2514		2643		2386
p-value for up-regulated genes (Fisher's exact test):					1		1		1		1
p-value for down-regulated genes (Fisher's exact test):					0.9138		0.9592		0.5966		0.1053
GENE ID	Gene name	Feature (AspGD)	Cluster	Key gene	log2FC	adj. p-value	log2FC	adj. p-value	log2FC	adj. p-value	log2FC	adj. p-value
					reference strain, Cd treated vs.	reference strain, untreated	DatfA mutant, Cd treated vs.	DatfA mutant, untreated	DatfA mutant, untreated vs.	reference strain, untreated	DatfA mutant, Cd treated vs.	reference strain, Cd treated
AN0044	AN0044	Ortholog(s) have ubiquitin protein ligase activity, role in DNA repair, nucleotide-excision repair, postreplication repair, protein ubiquitination and site of double-strand break localization	No PKS/NRPS backbone 4		-0.0929302	0.712165	-0.660848	0.000508321	0.0583301	0.797305	-0.509588	0.0103534
AN0043	AN0043	Has domain(s) with predicted transferase activity and role in biosynthetic process	No PKS/NRPS backbone 4		-0.180476	0.357158	-0.269757	0.102987	0.294992	0.0741687	0.205711	0.256394
AN0042	AN0042	Has domain(s) with predicted metal ion transmembrane transporter activity, role in metal ion transport, transmembrane transport and membrane localization	No PKS/NRPS backbone 4		0.348071	0.0428002	0.462697	0.00307518	-0.0869464	0.645464	0.0276793	0.896713
number of genes in the cluster:				3
up-regulated genes in the cluster:					1		1		0		0
down-regulated genes in the cluster:					0		1		0		1
number of the studied genes:				10748
up-regulated genes (total):					1875		2482		2840		2487
down-regulated genes (total):					1985		2514		2643		2386
p-value for up-regulated genes (Fisher's exact test):					0.4374		0.5452		1		1
p-value for down-regulated genes (Fisher's exact test):					1		0.5504		1		0.5291
GENE ID	Gene name	Feature (AspGD)	Cluster	Key gene	log2FC	adj. p-value	log2FC	adj. p-value	log2FC	adj. p-value	log2FC	adj. p-value
					reference strain, Cd treated vs.	reference strain, untreated	DatfA mutant, Cd treated vs.	DatfA mutant, untreated	DatfA mutant, untreated vs.	reference strain, untreated	DatfA mutant, Cd treated vs.	reference strain, Cd treated
AN0021	AN0021	Ortholog of A. fumigatus Af293 : Afu3g00630, A. niger CBS 513.88 : An01g07950, An14g07300, An01g11330, An06g02140 and A. oryzae RIB40 : AO090010000178, AO090026000311, AO090003000892	AN0016 cluster		0.758071	NA	0	NA	0	NA	-1.1286	NA
AN0020	AN0020	Ortholog of A. fumigatus Af293 : Afu2g00190, A. niger CBS 513.88 : An15g07480, Aspergillus versicolor : Aspve1_0365574, Aspergillus niger ATCC 1015 : 40853-mRNA and Aspergillus zonatus : Aspzo1_0077270	AN0016 cluster		0.459436	NA	3.75539	NA	-2.04591	NA	1.25005	0.541533
AN0019	AN0019	Protein of unknown function	AN0016 cluster		-0.0417483	0.959598	-0.0935137	0.917934	-1.43288	0.0187211	-1.48465	0.0163944
AN0018	AN0018	Possible pseudogene	AN0016 cluster		-0.174463	0.869954	1.62465	0.217845	-3.2841	0.00386778	-1.485	0.105801
AN0017	AN0017	Has domain(s) with predicted copper ion binding activity and role in copper ion homeostasis	AN0016 cluster		0.979688	0.151242	-0.0858354	0.924861	-0.154426	0.848182	-1.21995	0.0539252
AN0016	AN0016	Putative nonribosomal peptide synthase	AN0016 cluster	NRPS	-0.296982	0.70464	0.487154	0.529549	-1.32667	0.0417631	-0.542529	0.455408
AN0015	AN0015	Has domain(s) with predicted ATP binding, ATPase activity, ATPase-coupled transmembrane transporter activity, nucleoside-triphosphatase activity, nucleotide binding activity and role in transmembrane transport	AN0016 cluster		1.24158	NA	1.39908	0.277861	0.503127	0.766449	0.660619	0.622718
number of genes in the cluster:				7
up-regulated genes in the cluster:					0		0		0		0
down-regulated genes in the cluster:					0		0		3		1
number of the studied genes:				10748
up-regulated genes (total):					1875		2482		2840		2487
down-regulated genes (total):					1985		2514		2643		2386
p-value for up-regulated genes (Fisher's exact test):					1		1		1		1
p-value for down-regulated genes (Fisher's exact test):					1		1		0.2351		0.8276

## Sheet: Other groups
Supplementary Table S5 RNAseq data and the results of enrichment analyses of the studied gene groups
Sheet 7 - Other gene groups (squalene - ergosterol pathway genes, autophagy related genes, antioxidant enzyme genes, zinc transporter genes, ER to Golgi vesicle-mediated transport genes, phosphorelay response regulator genes, glycolysis genes)
Squalene - ergosterol pathway genes
GENE ID	Gene name	Feature (AspGD)	Orthologues in A. fumigatus	log2FC	adj. p-value	log2FC	adj. p-value	log2FC	adj. p-value	log2FC	adj. p-value
				reference strain, Cd treated vs.	reference strain, untreated	DatfA mutant, Cd treated vs.	DatfA mutant, untreated	DatfA mutant, untreated vs.	reference strain, untreated	DatfA mutant, Cd treated vs.	reference strain, Cd treated
AN0451	AN0451	Putative C-8 sterol isomerase with a predicted role in sterol metabolism	erg2	-0.950773	1.17212e-07	-1.05637	8.18885e-10	0.934219	5.95785e-08	0.828625	2.91185e-06
AN1147	AN1147	Ortholog of A. fumigatus Af293 : Afu1g11500/erg27, A. niger CBS 513.88 : An08g03620, Aspergillus wentii : Aspwe1_0172221, Aspergillus sydowii : Aspsy1_0053214 and Aspergillus terreus NIH2624 : ATET_00340	erg27	-0.525369	0.000190947	0.0260454	0.88518	0.261848	0.0581857	0.813262	4.66008e-10
AN4094	AN4094	Putative C-14 sterol reductase with a predicted role in sterol metabolism	erg24 (erg24A) and erg24B	-0.963043	1.21847e-10	-0.344293	0.028344	0.0718548	0.686376	0.690606	3.97157e-06
AN7146	AN7146	Putative S-adenosyl-methionine delta-24-sterol-C-methyltransferase with a predicted role in sterol metabolism	erg6	-0.342728	0.00364283	-0.773255	5.11449e-13	0.790717	1.41113e-13	0.36019	0.0015922
AN10648	AN10648	Ortholog(s) have delta24(24-1) sterol reductase activity, role in ergosterol biosynthetic process and endoplasmic reticulum localization	erg4 (erg4B)	-0.724675	1.66677e-06	-1.49784	2.76954e-27	1.04636	6.3392e-14	0.273193	0.0944411
AN11065	AN11065	Putative oxidosqualene-lanosterol cyclase with a predicted role in ergosterol metabolism	erg7 (erg7A), erg7B and erg7C	-0.676023	9.26538e-06	-0.990063	7.48539e-12	0.188984	0.241799	-0.125055	0.500319
AN4042	CYP61A1	Putative C-22 sterol desaturase with a predicted role in sterol metabolism; putative cytochrome P450	erg5	-0.67612	4.30317e-09	-1.04013	3.6034e-21	0.513819	5.38283e-06	0.149807	0.256946
AN6506	AN6506	Putative C-4 sterol methyl oxidase with a predicted role in sterol metabolism	erg3A, erg3B and erg3C	-0.560771	7.58954e-07	-0.825256	2.52046e-14	0.187044	0.115818	-0.077442	0.583592
AN6973	AN6973	Putative C-4 sterol methyl oxidase with a predicted role in sterol metabolism; expression reduced after exposure to farnesol	erg25 (erg25A) and erg25B	-0.722753	1.84483e-10	-0.896807	3.41189e-16	0.0132718	0.926151	-0.160782	0.213368
AN8283	cyp51B	Putative sterol 14-demethylase with a predicted role in sterol metabolism; putative cytochrome P450	cyp51A and cyp51B	-0.294384	0.0300745	-0.785997	8.81507e-11	0.231899	0.0761925	-0.259715	0.053047
AN11008	AN11008	Ortholog(s) have drug binding, squalene monooxygenase activity	erg1	0.524041	0.000414994	0.0627905	0.734751	0.120308	0.460636	-0.340942	0.0240088
AN1901	pdmA	Putative sterol 14 alpha-demethylase with a predicted role in sterol metabolism	cyp51A and cyp51B	0.235878	0.00430692	0.149817	0.072348	0.0411156	0.655495	-0.0449459	0.65155
AN7575	AN7575	Putative C-3 sterol dehydrogenase with a predicted role in sterol metabolism	erg26	0.386502	0.000456077	0.211822	0.0572012	0.338679	0.00154676	0.163999	0.16025
AN11081	AN11081	Has domain(s) with predicted 3-beta-hydroxy-delta5-steroid dehydrogenase activity and role in oxidation-reduction process, steroid biosynthetic process	erg26	0.14617	0.383788	0.266773	0.115397	-1.24731	6.77508e-18	-1.1267	4.11603e-16
AN8907	AN8907	Putative C-4 sterol methyl oxidase with a predicted role in sterol metabolism	erg25 (erg25A) and erg25B	0.0286067	0.825446	-0.0434217	0.712873	-0.306261	0.000937291	-0.37829	4.32441e-05
AN2684	AN2684	Putative oxidoreductase with a predicted role in sterol metabolism	erg4A	0.183613	0.21793	0.802836	6.34854e-12	0.210235	0.121837	0.829457	1.49724e-12
number of genes in the group:			16
up-regulated genes in the group:				3		1		5		5
down-regulated genes in the group:				10		9		2		3
stress responsive/AtfA-dependent genes in the group:				13		10		7		8
number of the studied genes:			10748
up-regulated genes (total):				1875		2482		2840		2487
down-regulated genes (total):				1985		2514		2643		2386
stress responsive genes (total):				3860		4996		5483		4873
p-value for up-regulated genes (Fisher's exact test):				0.5468		0.9851		0.4214		0.3038
p-value for down-regulated genes (Fisher's exact test):				0.0001217		0.004628		0.9322		0.7239
p-value for stress responsive/AtfA-dependent genes (Fisher's exact test):				0.0002725		0.1505		0.7969		0.448
Autophagy genes
GENE ID	Gene name	Feature (AspGD)	Description	log2FC	adj. p-value	log2FC	adj. p-value	log2FC	adj. p-value	log2FC	adj. p-value
				reference strain, Cd treated vs.	reference strain, untreated	DatfA mutant, Cd treated vs.	DatfA mutant, untreated	DatfA mutant, untreated vs.	reference strain, untreated	DatfA mutant, Cd treated vs.	reference strain, Cd treated
AN2876	AN2876	Ortholog of A. nidulans FGSC A4 : AN5876, A. fumigatus Af293 : Afu2g11370, Afu3g11770, Aspergillus wentii : Aspwe1_0653753 and Aspergillus sydowii : Aspsy1_0146596, Aspsy1_1176317	autophagy-related protein Atg22B2	-0.648398	0.0199591	-0.315221	0.342774	-1.04362	8.01888e-05	-0.710445	0.0160962
AN1632	atg1	Ortholog(s) have protein serine/threonine kinase activity	autophagy-related protein Atg1	0.305141	0.0329766	0.463231	0.000510744	-0.58213	8.3814e-06	-0.42404	0.00157706
AN3734	AN3734	Possible pseudogene, similar to autophagy-related protein	autophagy-related protein Atg9	0.395497	2.61842e-05	0.453458	1.29654e-06	-0.814966	3.29805e-19	-0.757005	1.27996e-17
AN7428	AN7428	Ortholog(s) have role in autophagy, macroautophagy	autophagy-related protein Atg7	0.360825	5.31549e-05	0.403471	4.09141e-06	-0.467005	8.8123e-08	-0.424359	6.58221e-07
AN5131	atgH	Ortholog(s) have phosphatidylethanolamine binding, protein tag activity	autophagy-related protein Atg8	0.573009	1.16282e-08	1.09807	1.59395e-30	-0.311089	0.00230058	0.213969	0.0442138
AN6351	AN6351	Ortholog(s) have phosphatidylinositol-3-phosphate binding activity and role in autophagy of mitochondrion, cytoplasm to vacuole transport by the Cvt pathway, early endosome to Golgi transport, macroautophagy	autophagy protein Atg20,putative	0.287401	0.00995838	0.42968	2.06636e-05	0.420347	4.54747e-05	0.562626	1.87322e-08
AN0127	AN0127	Ortholog(s) have phosphatidylinositol-3,5-bisphosphate binding, phosphatidylinositol-3-phosphate binding, phosphatidylinositol-4-phosphate binding, ubiquitin binding activity	autophagy-related protein Atg18	0.506581	0.000254219	0.451006	0.000503513	0.303852	0.0293266	0.248277	0.0730014
AN2076	AN2076	Ortholog(s) have role in autophagy, autophagy of mitochondrion, macroautophagy, protein secretion and phagophore assembly site localization	autophagy-related protein Atg13	0.597438	3.23989e-05	1.08609	5.55004e-16	-0.017472	0.921551	0.471179	0.000796784
AN5919	AN5919	Ortholog(s) have phospholipase activity	autophagy-related protein Atg15	0.348589	0.0443937	1.04283	6.34854e-12	-0.289396	0.08894	0.404848	0.0113588
AN2887	AN2887	Ortholog(s) have role in autophagy of mitochondrion	autophagy-related protein Atg11	0.630398	1.89653e-06	0.524013	4.98281e-05	-0.0713599	0.649826	-0.177744	0.21485
AN0090	AN0090	Ortholog of A. fumigatus Af293 : Afu5g12120, A. niger CBS 513.88 : An18g02220/atg16, Aspergillus wentii : Aspwe1_0170744, Aspergillus sydowii : Aspsy1_0040537 and Aspergillus terreus NIH2624 : ATET_02061	autophagy-related protein Atg16	-0.407913	0.0505513	-0.470959	0.00937066	0.565553	0.00183179	0.502506	0.00924175
AN7591	AN7591	Ortholog of A. nidulans FGSC A4 : AN7437, A. fumigatus Af293 : Afu2g06170, Afu2g15370, A. niger CBS 513.88 : An09g03630, An02g14810/atg22 and A. oryzae RIB40 : AO090012000289, AO090001000734	autophagy-related protein Atg22A2	-0.201267	0.220817	-0.303301	0.0353402	0.370147	0.0088026	0.268113	0.0760874
AN5491	AN5491	Ortholog(s) have phosphatidylinositol-3-phosphate binding activity	autophagy-related protein Atg2	0.0112855	0.940179	0.555156	2.91392e-08	-0.802667	3.41439e-16	-0.258796	0.0136493
AN1701	AN1701	Ortholog of A. fumigatus Af293 : Afu4g08470, A. niger CBS 513.88 : An04g03260/atg28, A. oryzae RIB40 : AO090023000715, Aspergillus wentii : Aspwe1_0034455 and Aspergillus sydowii : Aspsy1_0038734	autophagy-related protein Atg28	0.239438	0.168037	0.616001	5.10431e-05	-0.448703	0.00478878	-0.0721402	0.706073
AN3470	AN3470	Ortholog(s) have Atg8-specific protease activity	autophagy-related protein Atg4	0.0609986	0.640641	0.344527	0.000629225	-0.456214	3.77209e-06	-0.172686	0.111983
AN4601	AN4601	Ortholog(s) have sterol 3-beta-glucosyltransferase activity and role in ascospore-type prospore membrane assembly, sterol metabolic process	autophagy-related protein Atg26	-0.024951	0.87448	0.951193	2.45582e-18	-0.941892	9.10726e-18	0.0342515	0.819731
AN5174	AN5174	Ortholog(s) have Atg8 ligase activity, enzyme activator activity	autophagy-related protein Atg5	0.192151	0.163997	0.303378	0.00826127	0.648253	1.6701e-08	0.759481	6.84607e-12
AN11004	AN11004	Ortholog(s) have Atg8 ligase activity	autophagy-related protein Atg3	0.0923152	0.436975	0.497062	1.0053e-07	-0.066474	0.55011	0.338273	0.000444857
AN3584	AN3584	Ortholog(s) have phosphatidylinositol-3-phosphate binding activity	autophagy-related protein Atg24	-0.149506	0.242449	0.418546	8.91017e-05	-0.0832257	0.504476	0.484826	5.62734e-06
AN4832	AN4832	Ortholog of A. fumigatus Af293 : Afu3g07240, A. niger CBS 513.88 : An02g13480/atg29, A. oryzae RIB40 : AO090020000200, Aspergillus wentii : Aspwe1_0042020 and Aspergillus sydowii : Aspsy1_0148063	autophagy-related protein Atg29	0.170246	0.327128	0.311124	0.0517174	-0.567182	0.000174777	-0.426304	0.00412065
AN7437	AN7437	Ortholog(s) have L-amino acid transmembrane transporter activity and role in L-alpha-amino acid transmembrane transport, amino acid transmembrane export from vacuole	autophagy-related protein Atg22A1	0.0410554	0.831379	0.261754	0.0799055	-0.629376	4.44672e-06	-0.408678	0.0036944
AN1760	AN1760	Ortholog(s) have role in autophagy, macroautophagy	autophagy-related protein Atg12	-0.1895	0.319583	-0.247342	0.16275	-0.316895	0.0577117	-0.374737	0.0275514
AN0861	AN0861	Ortholog of A. fumigatus Af293 : Afu1g15250, A. oryzae RIB40 : AO090005001206, Aspergillus wentii : Aspwe1_0051149, Aspergillus sydowii : Aspsy1_0122516 and Aspergillus terreus NIH2624 : ATET_00827	autophagy-related protein Atg27	0.0164926	0.891504	0.144175	0.104445	-0.0360476	0.717694	0.0916344	0.341745
AN10728	AN10728	Ortholog of Aspergillus versicolor : Aspve1_0084438, Aspergillus zonatus : Aspzo1_1674623, Aspergillus sydowii : Aspsy1_0056919 and Aspergillus carbonarius ITEM 5010 : Acar5010_128637, Acar5010_128669	autophagy-related protein Atg10 (JCVI)	-0.653088	0.0959358	-0.527526	0.168981	-0.244186	0.531326	-0.118625	0.80972
AN5876	AN5876	Ortholog of A. nidulans FGSC A4 : AN2876, A. fumigatus Af293 : Afu2g11370, Afu3g11770, Aspergillus wentii : Aspwe1_0653753 and Aspergillus sydowii : Aspsy1_0146596, Aspsy1_1176317	autophagy-related protein Atg22B1	0.132906	0.888192	0.582847	0.371668	0.432833	0.556251	0.882775	0.179083
AN6360	AN6360	Has domain(s) with predicted role in autophagy	autophagy-related protein Atg17	-0.110935	0.512263	-0.0391116	0.831832	-0.266342	0.0583964	-0.194519	0.196242
number of genes in the group:			26
up-regulated genes in the group:				9		16		5		8
down-regulated genes in the group:				1		2		11		8
stress responsive/AtfA-dependent genes in the group:				10		18		16		16
number of the studied genes:			10748
up-regulated genes (total):				1875		2482		2840		2487
down-regulated genes (total):				1985		2514		2643		2386
stress responsive genes (total):				3860		4996		5483		4873
p-value for up-regulated genes (Fisher's exact test):				0.02692		2.961e-05		0.8558		0.2381
p-value for down-regulated genes (Fisher's exact test):				0.9951		0.9913		0.03565		0.2028
p-value for stress responsive/AtfA-dependent genes (Fisher's exact test):				0.4659		0.0162		0.1902		0.07183
Antioxidant enzyme genes
GENE ID	Gene name	Feature (AspGD)	Description	log2FC	adj. p-value	log2FC	adj. p-value	log2FC	adj. p-value	log2FC	adj. p-value
				reference strain, Cd treated vs.	reference strain, untreated	DatfA mutant, Cd treated vs.	DatfA mutant, untreated	DatfA mutant, untreated vs.	reference strain, untreated	DatfA mutant, Cd treated vs.	reference strain, Cd treated
AN9464	AN9464	Has domain(s) with predicted electron transfer activity, protein disulfide oxidoreductase activity and role in cell redox homeostasis	glutaredoxin	-0.61215	0.000186095	-0.515391	0.00114813	0.120857	0.499311	0.217616	0.228106
AN7567	AN7567	Ortholog(s) have 2 iron, 2 sulfur cluster binding, RNA polymerase II activating transcription factor binding, disulfide oxidoreductase activity, glutathione disulfide oxidoreductase activity, iron-sulfur cluster binding activity	glutaredoxin	1.19395	1.87286e-18	0.663311	1.07534e-06	0.450064	0.00140219	-0.0805751	0.645195
AN4304	AN4304	Ortholog(s) have 2 iron, 2 sulfur cluster binding, disulfide oxidoreductase activity, glutathione disulfide oxidoreductase activity	glutaredoxin	0.308373	0.0148167	0.479737	3.38893e-05	0.162983	0.202268	0.334347	0.00539318
AN4215	AN4215	Ortholog(s) have disulfide oxidoreductase activity, glutathione disulfide oxidoreductase activity, glutathione peroxidase activity, glutathione transferase activity	glutaredoxin	-0.110539	0.321942	0.0770891	0.480781	0.131516	0.189682	0.319143	0.000701364
AN2846	gpxA	Putative glutathione peroxidase with a predicted role in glutathione biosynthesis; protein induced by farnesol	glutathione peroxidase	-0.223932	0.0459025	0.356332	0.000489682	-0.148774	0.175975	0.43149	2.14896e-05
AN0629	AN0629	Ortholog(s) have glutathione peroxidase activity, glutathione transferase activity, role in glutathione metabolic process, protein glutathionylation and cytoplasm, endoplasmic reticulum localization	glutathione peroxidase/S-transferase	0.0955822	0.711388	-0.149016	0.485468	0.570281	0.00262784	0.325683	0.107477
AN0932	glrA	Putative glutathione oxidoreductase with a predicted role in glutathione biosynthesis	glutathione reductase	-0.135421	0.282456	0.109257	0.372164	0.242936	0.0268431	0.487614	3.88023e-06
AN3255	AN3255	Predicted glutathione peroxidase; predicted secondary metabolism gene cluster member	glutathione-S-transferase	-1.06675	3.63071e-13	1.59117	1.24838e-16	-3.08582	6.72485e-66	-0.427896	0.00994594
AN10273	gst3	Putative glutathione S-transferase; intracellular, menadione stress-induced protein	glutathione-S-transferase	-0.321596	0.00577679	-0.112492	0.356578	0.504953	1.84851e-06	0.714058	1.09872e-11
AN5831	AN5831	Ortholog of A. nidulans FGSC A4 : AN10273/gst3, A. fumigatus Af293 : Afu2g15770, A. niger CBS 513.88 : An15g06030, An05g00350 and A. oryzae RIB40 : AO090011000920	glutathione-S-transferase	0.236622	0.296409	-0.0499526	0.851914	-0.742136	0.000106429	-1.02871	5.0181e-08
AN6024	gstB	Protein with glutathione S-transferase and glutathione peroxidase activities; intracellular, menadione stress-induced protein	glutathione-S-transferase	-0.18509	0.59648	0.0886619	0.848508	-1.82028	1.269e-09	-1.54653	1.94495e-07
AN4905	gstA	theta class glutathione S-transferase; involved in resistance to a variety of xenobiotics and metals; confers susceptibility to the systemic fungicide carboxin	glutathione-S-transferase	-0.157923	0.169481	0.170311	0.0888244	0.624614	2.94207e-11	0.952847	2.96461e-25
AN10379	AN10379	Has domain(s) with predicted glutathione transferase activity	glutathione-S-transferase	0.0872455	0.596722	0.113267	0.441034	-0.0513344	0.737108	-0.0253127	0.885859
AN4023	AN4023	Has domain(s) with predicted peroxiredoxin activity and role in oxidation-reduction process	peroxiredoxin	-1.08984	2.41703e-11	-0.803895	4.70133e-08	0.895887	1.48626e-09	1.18184	4.93445e-14
AN5232	AN5232	Has domain(s) with predicted peroxiredoxin activity and role in oxidation-reduction process	peroxiredoxin	-0.647156	0.00228019	-0.615248	0.0014788	0.639151	0.000983768	0.671059	0.000977092
AN3973	tpxB	Putative peroxiredoxin	peroxiredoxin	-0.437198	1.91019e-05	-0.468311	5.37353e-07	1.28044	3.07032e-44	1.24933	3.53893e-41
AN10223	tpxA	Putative 1-Cys peroxiredoxin; intracellular; protein abundance decreased by menadione stress; expression reduced after exposure to farnesol	peroxiredoxin	0.378281	0.000130764	0.396721	3.44767e-05	-0.283108	0.0036381	-0.264668	0.00805031
AN1252	AN1252	Has domain(s) with predicted peroxiredoxin activity and role in oxidation-reduction process	peroxiredoxin	-0.417807	0.361979	-0.755668	0.0601882	0.0225849	0.96179	-0.315276	0.505286
AN0170	trxA	Thioredoxin; predicted role in cell redox homeostasis; required for conidiation; expression upregulated after exposure to farnesol	thioredoxin	-0.364987	0.00330086	-0.24858	0.046497	-0.619819	7.33979e-08	-0.503412	1.96662e-05
AN8080	AN8080	Ortholog(s) have thioredoxin peroxidase activity, role in cell redox homeostasis, cellular response to oxidative stress, response to metal ion and cytoplasm, hyphal cell wall, intracellular, peroxisome, yeast-form cell wall localization	thioredoxin peroxidase	0.027954	0.861471	0.270162	0.0205147	0.383594	0.000660126	0.625802	1.27911e-08
AN8692	prxA	Thioredoxin-dependent peroxidase; intracellular; PRX5-like domain; highly similar to the allergen Aspf3 from related fungi; menadione stress-repressed protein; osmoadaptation-induced protein; repressed by starvation-induced autophagy	thioredoxin peroxidase	0.0408487	0.799099	0.0740662	0.599609	0.66845	2.14964e-09	0.701667	3.93733e-10
AN8218	trxB	Putative thioredoxin reductase	thioredoxin reductase	0.034412	0.882107	-0.738195	1.74334e-06	3.13624	5.69404e-98	2.36363	4.29779e-56
AN3581	trxR	Thioredoxin reductase with a predicted role in pyrimidine metabolism; putative flavoprotein; intracellular, menadione stress-induced protein; transcripts of two different sizes have been detected	thioredoxin reductase	-0.243439	0.259144	-0.328539	0.0978165	-0.330313	0.0886453	-0.415414	0.0334267
AN7924	AN7924	Has domain(s) with predicted peroxidase activity	peroxidase	1.02339	3.15529e-06	1.33481	5.21133e-11	-0.0900329	0.747436	0.221392	0.322591
AN8395	AN8395	Has domain(s) with predicted peroxidase activity	peroxidase	2.24674	NA	0.495082	0.724643	3.89882	0.0195283	2.14716	0.143468
AN2578	AN2578	Has domain(s) with predicted peroxidase activity	peroxidase	0.0452026	0.783899	-0.158413	0.215472	2.63714	3.3402e-127	2.43352	5.5954e-109
AN6457	AN6457	Has domain(s) with predicted peroxidase activity	peroxidase	0.781428	NA	1.62144	0.277917	-0.682851	0.692255	0.15716	0.924524
AN1131	AN1131	Putative cytosolic Cu/Zn superoxide dismutase; transcript repressed by light in developmentally competent mycelia	Cu/Zn-superoxide dismutase	-0.102684	0.540203	-0.347681	0.0660208	-2.64974	6.11922e-75	-2.89474	1.72811e-84
AN10220	ccp1	Putatice cytochrome c peroxidase; intracellular; protein abundance decreased by menadione stress	cytochrome c peroxidase	0.494958	0.0140077	0.883457	1.92296e-06	-0.478767	0.0127135	-0.0902683	0.71379
AN5440	AN5440	Putative cytochrome c peroxidase; expression upregulated after exposure to farnesol	cytochrome c peroxidase	0.292578	0.386034	-0.253393	0.409686	1.38187	2.083e-07	0.835902	0.00247237
AN5577	sodB	Manganese-superoxide dismutase	Mn-superoxide dismutase	0.183737	0.0491896	0.180601	0.0445098	-0.211984	0.0152423	-0.215121	0.0154634
AN0785	sodM	Putative manganese superoxide dismutase	Mn-superoxide dismutase	-0.830362	NA	0.0956184	0.962835	0.697221	0.692631	1.6232	0.395278
AN0241	sodA	Cu/Zn-superoxide dismutase; induced under iron starvation and repressed under copper starvation	Cu/Zn-superoxide dismutase	0.0737733	0.499587	0.491086	6.50684e-09	0.280331	0.00130764	0.697643	5.65163e-17
Putative, konwn catalases
AN8637	catA	Conidia-specific catalase; predicted role in gluconic acid and gluconate metabolism	catalase	-0.874107	0.000619777	1.75207	0.0431672	-7.7903	8.74505e-29	-5.16412	2.13102e-35
AN9339	catB	Hyphal catalase with a predicted role in gluconic acid and gluconate metabolism	catalase	0.30203	0.0211311	-0.0410796	0.801315	-1.93939	2.16869e-64	-2.2825	7.34049e-89
AN5918	catC	Putative catalase with a predicted role in gluconic acid and gluconate metabolism	catalase	0.400098	0.0130358	0.182078	0.18272	1.71493	3.14429e-37	1.49691	3.69246e-32
AN8553	AN8553	Putative catalase with a predicted role in gluconic acid and gluconate metabolism	catalase	-0.417762	0.080188	0.37721	0.12907	-1.03817	2.49848e-06	-0.243195	0.343191
AN7388	cpeA/catD	Putative catalase-peroxidase with a predicted role in gluconic acid and gluconate metabolism; protein also identified as laccase II which is expressed during sexual development	catalase-peroxidase	-1.53812	1.46667e-24	-0.146948	0.566584	-3.16341	2.75517e-77	-1.77224	1.18398e-22
All genes
number of genes in the group:			38
up-regulated genes in the group:				8		11		16		16
down-regulated genes in the group:				10		6		12		11
stress responsive/AtfA-dependent genes in the group:				18		17		28		27
number of the studied genes:			10748
up-regulated genes (total):				1875		2482		2840		2487
down-regulated genes (total):				1985		2514		2643		2386
stress responsive genes (total):				3860		4996		5483		4873
p-value for up-regulated genes (Fisher's exact test):				0.3401		0.247		0.02578		0.007193
p-value for down-regulated genes (Fisher's exact test):				0.1493		0.9086		0.2049		0.2061
p-value for stress responsive/AtfA-dependent genes (Fisher's exact test):				0.09737		0.6462		0.003661		0.001182
Zinc transporter genes
GENE ID	Gene name	Feature (AspGD)		log2FC	adj. p-value	log2FC	adj. p-value	log2FC	adj. p-value	log2FC	adj. p-value
				reference strain, Cd treated vs.	reference strain, untreated	DatfA mutant, Cd treated vs.	DatfA mutant, untreated	DatfA mutant, untreated vs.	reference strain, untreated	DatfA mutant, Cd treated vs.	reference strain, Cd treated
AN10468	AN10468	Ortholog(s) have role in cadmium ion transport, zinc ion transport		-1.32055	2.77828e-18	-0.725098	1.38513e-06	-0.424737	0.00410635	0.170717	0.368903
AN1076	AN1076	Ortholog(s) have zinc ion transmembrane transporter activity, role in cellular zinc ion homeostasis, zinc ion import into Golgi apparatus, zinc ion import into organelle and Golgi membrane localization		-0.34657	0.0624779	-0.527506	0.00116491	0.329751	0.0510837	0.148815	0.462121
AN1795	AN1795	Ortholog(s) have cobalt ion transmembrane transporter activity, zinc ion transmembrane transporter activity		-0.321068	0.0172958	-0.36257	0.00407974	0.531296	1.43673e-05	0.489794	9.36272e-05
AN1833	AN1833	Ortholog(s) have zinc ion binding activity and role in pathogenesis, sequestering of zinc ion, zinc ion homeostasis, zinc ion transmembrane transport, zinc ion transport		-2.23528	1.92634e-25	-2.57989	9.86125e-46	1.30074	1.04104e-13	0.95613	3.19705e-05
AN3799	AN3799	Ortholog(s) have low-affinity zinc ion transmembrane transporter activity, zinc ion transmembrane transporter activity		-1.81604	1.42824e-15	-1.93735	5.90844e-19	0.50711	0.0274418	0.385809	0.139462
AN7673	AN7673	Ortholog(s) have zinc ion transmembrane transporter activity, role in zinc ion transport and endoplasmic reticulum localization		0.0800693	0.692005	-0.357691	0.0189959	0.307025	0.0484744	-0.130735	0.469055
AN8337	AN8337	Ortholog(s) have high-affinity zinc transmembrane transporter activity, zinc ion transmembrane transporter activity		-0.553785	0.0576148	0.269988	0.369968	-0.504371	0.0671396	0.319402	0.293842
number of genes in the group:			7
up-regulated genes in the group:				0		0		4		2
down-regulated genes in the group:				4		6		1		0
stress responsive/AtfA-dependent genes in the group:				4		6		5		2
number of the studied genes:			10748
up-regulated genes (total):				1875		2482		2840		2487
down-regulated genes (total):				1985		2514		2643		2386
stress responsive genes (total):				3860		4996		5483		4873
p-value for up-regulated genes (Fisher's exact test):				1		1		0.08438		0.5076
p-value for down-regulated genes (Fisher's exact test):				0.02526		0.0009128		0.8614		1
p-value for stress responsive/AtfA-dependent genes (Fisher's exact test):				0.2151		0.04243		0.2435		0.9008
ER to Golgi vesicle-mediated transport genes
GENE ID	Gene name	Feature (AspGD)		log2FC	adj. p-value	log2FC	adj. p-value	log2FC	adj. p-value	log2FC	adj. p-value
				reference strain, Cd treated vs.	reference strain, untreated	DatfA mutant, Cd treated vs.	DatfA mutant, untreated	DatfA mutant, untreated vs.	reference strain, untreated	DatfA mutant, Cd treated vs.	reference strain, Cd treated
AN2222	AN2222	Ortholog(s) have GTPase activator activity, actin binding activity		-0.637946	4.73844e-06	-0.96067	1.03401e-13	0.700423	8.43816e-08	0.377699	0.00804898
AN4495	AN4495	Ortholog(s) have role in endoplasmic reticulum to Golgi vesicle-mediated transport		-0.539407	0.00293613	-0.917285	1.91095e-08	0.473041	0.00496525	0.0951632	0.668552
AN1845	shrA	Endoplasmic reticulum packaging chaperone, required for incorporation of amino acid permeases (aspartate and proline transporters) into COPII coated vesicles for transport to the cell surface		-0.44425	0.00337761	-0.237335	0.118001	0.376158	0.00893432	0.583073	4.48034e-05
AN5127	AN5127	Ortholog(s) have SNAP receptor activity and role in endoplasmic reticulum to Golgi vesicle-mediated transport, retrograde vesicle-mediated transport, Golgi to endoplasmic reticulum, vesicle fusion		-0.284169	0.0310816	-0.0602792	0.673397	0.572337	6.39933e-07	0.796227	3.00548e-12
AN9086	AN9086	Component of the TRAPII complex that mediates Rab guanyl-nucleotide exchange factor activity, involved in Golgi vesicle-mediated transport		-0.456669	0.00248614	-0.283365	0.0530359	0.458705	0.00109956	0.632009	7.60085e-06
AN8828	AN8828	Component of the TRAPII complex that mediates Rab guanyl-nucleotide exchange factor activity, involved in Golgi vesicle-mediated transport		-0.440588	0.0030381	-0.00300501	0.987754	-0.0867287	0.587946	0.350855	0.016246
AN1117	AN1117	Ortholog(s) have COPII adaptor activity, role in endoplasmic reticulum to Golgi vesicle-mediated transport and COPII-coated ER to Golgi transport vesicle, plasma membrane localization		0.508011	2.24623e-07	0.432834	5.26864e-06	0.405179	2.64608e-05	0.330003	0.000727001
AN4317	sec13	Putative nuclear pore complex protein with homology to Saccharomyces cerevisiae Sec13p		0.611904	1.74532e-14	0.399131	2.78045e-07	0.492165	4.19287e-10	0.279392	0.000486312
AN4446	AN4446	Ortholog(s) have role in endoplasmic reticulum to Golgi vesicle-mediated transport, protein retention in ER lumen and COPII-coated ER to Golgi transport vesicle localization		0.342531	0.000259302	0.570727	4.66961e-11	0.310728	0.000631561	0.538924	6.18176e-10
AN6033	AN6033	Ortholog(s) have GTPase activator activity and role in COPI coating of Golgi vesicle, endoplasmic reticulum to Golgi vesicle-mediated transport, retrograde vesicle-mediated transport, Golgi to endoplasmic reticulum		0.431022	1.43002e-05	0.313195	0.00137766	0.215207	0.0334803	0.0973803	0.395742
AN3080	AN3080	Has domain(s) with predicted zinc ion binding activity, role in endoplasmic reticulum to Golgi vesicle-mediated transport, intracellular protein transport and COPII vesicle coat localization		0.49931	9.03562e-05	0.652243	7.16204e-08	0.187592	0.160222	0.340525	0.00776374
AN0261	sec23	COPII coat component; considered a prototypic marker of transitional ER (endoplasmic reticulum); localizes to a cytosolic haze and to numerous small foci that predominate near the hyphal tips		0.759788	4.55405e-14	0.698134	1.5279e-12	0.149213	0.17707	0.0875585	0.479111
AN0922	AN0922	Ortholog(s) have role in Golgi inheritance, Golgi localization, endoplasmic reticulum to Golgi vesicle-mediated transport, retrograde vesicle-mediated transport, Golgi to endoplasmic reticulum and COPI vesicle coat localization		0.510085	8.18847e-10	0.417253	2.79279e-07	0.132545	0.138853	0.0397123	0.712723
AN1981	AN1981	Ortholog(s) have Rab geranylgeranyltransferase activity and role in endoplasmic reticulum to Golgi vesicle-mediated transport, protein geranylgeranylation, protein targeting to membrane		0.296392	0.0287057	0.26121	0.0391243	0.10274	0.47263	0.0675577	0.657942
AN3720	AN3720	Ortholog(s) have endoplasmic reticulum exit site localization		0.403487	0.000320156	0.272833	0.0151204	-0.0147443	0.913775	-0.145398	0.236546
AN6257	AN6257	Ortholog(s) have role in endoplasmic reticulum to Golgi vesicle-mediated transport, intracellular protein transport, nuclear envelope organization		0.345387	0.00878277	0.271046	0.0369497	0.101556	0.470925	0.0272142	0.874607
AN5915	rerA	Integral membrane protein; retrieval receptor for ER resident proteins; early Golgi marker in studies of cisternal maturation		0.287168	0.00638037	0.162148	0.120594	0.427844	1.11292e-05	0.302823	0.00227392
AN3026	copA	Alpha-COP coatamer-related protein involved in the establishment and maintenance of polarized growth; temperature sensitive mutants defective in nuclear division at the restrictive temperature		0.196241	0.0456753	-0.16072	0.0940952	0.268101	0.00299856	-0.0888596	0.40317
AN10878	AN10878	Ortholog(s) have role in cellular response to drug, endoplasmic reticulum to Golgi vesicle-mediated transport, vesicle fusion with Golgi apparatus, vesicle-mediated transport		0.377932	0.00364442	0.147297	0.282646	0.21382	0.102486	-0.0168154	0.925433
AN8488	AN8488	Ortholog(s) have SNAP receptor activity, palmitoyltransferase activity		0.302371	0.0103191	0.199337	0.0891754	0.182802	0.12029	0.0797682	0.556408
AN10313	AN10313	Ortholog(s) have role in endoplasmic reticulum to Golgi vesicle-mediated transport, retrograde transport, endosome to Golgi		0.19747	0.458275	-0.711804	0.000418243	0.871358	2.10648e-05	-0.0379163	0.898343
AN1154	AN1154	Ortholog(s) have role in endoplasmic reticulum to Golgi vesicle-mediated transport, protein retention in ER lumen, vesicle organization and COPII-coated ER to Golgi transport vesicle, endoplasmic reticulum, plasma membrane localization		0.102334	0.471841	0.377773	0.00085356	0.420727	0.000198046	0.696166	2.23781e-10
AN4165	AN4165	Ortholog(s) have role in endoplasmic reticulum to Golgi vesicle-mediated transport and COPII-coated ER to Golgi transport vesicle, plasma membrane localization		0.259292	0.0533102	0.444399	0.000222873	0.628525	1.19385e-07	0.813633	3.26166e-12
AN5195	AN5195	Ortholog(s) have cargo receptor activity and role in ascospore formation, axial cellular bud site selection, endoplasmic reticulum to Golgi vesicle-mediated transport		-0.0446184	0.725794	0.193195	0.0482877	0.379744	4.22862e-05	0.617558	8.40233e-12
AN7302	AN7302	Ortholog(s) have carbohydrate derivative binding activity and role in endoplasmic reticulum to Golgi vesicle-mediated transport		0.103709	0.579549	0.348698	0.0182221	0.375802	0.0107473	0.620791	1.31911e-05
AN7679	AN7679	Ortholog(s) have role in endoplasmic reticulum to Golgi vesicle-mediated transport and COPII-coated ER to Golgi transport vesicle, integral component of Golgi membrane, integral component of endoplasmic reticulum membrane localization		0.191743	0.106552	0.427871	1.99626e-05	0.386104	0.000217509	0.622231	3.7585e-10
AN1069	AN1069	Ortholog(s) have unfolded protein binding activity		0.108265	0.351542	0.585327	1.64571e-10	0.042484	0.712177	0.519546	1.83178e-08
AN11715	AN11715	Ortholog(s) have role in endoplasmic reticulum to Golgi vesicle-mediated transport and COPII-coated ER to Golgi transport vesicle, endoplasmic reticulum membrane, integral component of Golgi membrane localization		0.0195904	0.925304	0.29107	0.0488256	0.18067	0.247178	0.45215	0.00165108
AN0706	AN0706	Ortholog(s) have role in Golgi vesicle docking, SNARE complex assembly, endoplasmic reticulum to Golgi vesicle-mediated transport and ER to Golgi transport vesicle membrane, Golgi membrane localization		0.160932	0.166176	0.266845	0.00989106	-0.00554163	0.966003	0.100372	0.399659
AN3747	AN3747	Ortholog(s) have Rab geranylgeranyltransferase activity and role in endoplasmic reticulum to Golgi vesicle-mediated transport, protein geranylgeranylation, protein targeting to membrane		0.0309849	0.894981	-0.120424	0.536518	-0.349568	0.0364598	-0.500977	0.00245013
AN6709	hypB	Putative ADP ribosylation factor guanine nucleotide exchange factor; Sec7-domain protein; role in hyphal morphogenesis; mutants display abnormal hyphae, hyphal tip cell death and excessive septum formation		-0.0919949	0.499523	0.0933171	0.465311	-0.289727	0.00876582	-0.104415	0.418638
AN0411	sarA	Putative GTPase with a predicted role in ER to Golgi transport		-0.0439545	0.668871	-0.102009	0.228868	0.34075	6.75119e-06	0.282695	0.000264216
AN11500	AN11500	Component of the TRAPII complex that mediates Rab guanyl-nucleotide exchange factor activity, involved in Golgi vesicle-mediated transport		-0.204886	0.324971	-0.0153268	0.947464	0.58906	0.000355492	0.778619	1.8773e-06
AN4281	rabO	Putative GTPase with a predicted role in transport between cis and medial Golgi compartments		-0.0377304	0.781187	-0.0770477	0.513819	0.306781	0.00196049	0.267464	0.00897087
AN10186	AN10186	Ortholog(s) have GTPase binding activity, role in endoplasmic reticulum to Golgi vesicle-mediated transport and Golgi membrane localization		0.00259838	0.986477	-0.0683778	0.570371	0.234666	0.0237328	0.16369	0.139143
AN11226	AN11226	Ortholog(s) have HDEL sequence binding activity, role in endoplasmic reticulum to Golgi vesicle-mediated transport and integral component of endoplasmic reticulum membrane localization		-0.0398249	0.877938	-0.214911	0.290255	0.51333	0.00509091	0.338244	0.0851776
AN5788	AN5788	Ortholog(s) have COPII adaptor activity and role in endoplasmic reticulum to Golgi vesicle-mediated transport, fungal-type cell wall organization, protein retention in Golgi apparatus		0.196564	0.313919	0.0838431	0.671242	0.363596	0.0301858	0.250875	0.154997
AN5972	AN5972	Ortholog(s) have ubiquitin binding activity		0.131149	0.166176	-0.073164	0.447341	0.217795	0.00942747	0.0134825	0.910082
AN1126	arfA	Putative ADP ribosylation factor involved in hyphal growth and secretion; essential gene; ArfA-GFP localizes to presumed Golgi compartments		0.0385882	0.725959	0.0634627	0.517768	0.160386	0.0605909	0.18526	0.0324803
AN1980	AN1980	Ortholog(s) have role in endoplasmic reticulum to Golgi vesicle-mediated transport, regulation of exocytosis and Golgi-associated vesicle, cellular bud neck, cellular bud tip, incipient cellular bud site, plasma membrane localization		0.0861443	0.625625	-0.0270726	0.884227	0.141915	0.343802	0.0286981	0.8774
AN4886	AN4886	Ortholog(s) have cargo adaptor activity		-0.034015	0.853381	0.0884486	0.565149	0.0460348	0.766462	0.168498	0.244264
AN6825	AN6825	Component of the TRAPII complex that mediates Rab guanyl-nucleotide exchange factor activity, involved in Golgi vesicle-mediated transport		0.143614	0.358581	-0.00727665	0.970018	0.116678	0.425306	-0.0342126	0.845872
number of genes in the group:			42
up-regulated genes in the group:				14		18		24		21
down-regulated genes in the group:				6		3		2		1
stress responsive/AtfA-dependent genes in the group:				20		21		26		22
number of the studied genes:			10748
up-regulated genes (total):				1875		2482		2840		2487
down-regulated genes (total):				1985		2514		2643		2386
stress responsive genes (total):				3860		4996		5483		4873
p-value for up-regulated genes (Fisher's exact test):				0.0094		0.003483		2.435e-05		0.0001287
p-value for down-regulated genes (Fisher's exact test):				0.8137		0.9987		0.9999		1
p-value for stress responsive/AtfA-dependent genes (Fisher's exact test):				0.07905		0.3799		0.1035		0.2222
Phosphorelay response regulator genes
GENE ID	Gene name	Feature (AspGD)		log2FC	adj. p-value	log2FC	adj. p-value	log2FC	adj. p-value	log2FC	adj. p-value
				reference strain, Cd treated vs.	reference strain, untreated	DatfA mutant, Cd treated vs.	DatfA mutant, untreated	DatfA mutant, untreated vs.	reference strain, untreated	DatfA mutant, Cd treated vs.	reference strain, Cd treated
AN1800	tcsB	Transmembrane histidine kinase, part of a two-component signal transducer involved in the HOG signaling pathway that regulates osmotic stress response' transcript upregulated by growth in glycerol		-0.407588	0.00103481	0.213112	0.115645	-2.38475	1.00414e-95	-1.76405	3.24079e-53
AN2005	ypdA	Histidine-containing phosphotransfer protein, part of a two-component signal transducer involved in the HOG signaling pathway that regulates osmotic stress response		0.0271885	0.895732	0.0562414	0.761524	0.241233	0.109272	0.270286	0.0784097
AN2363	hk-8-6	Putative histidine-containing phosphotransfer protein		-0.00203277	0.98907	0.493391	5.97892e-07	-0.81764	2.26993e-17	-0.322217	0.00120282
AN2581	hk-8-1	Putative histidine-containing phosphotransfer protein		-0.824442	1.70367e-09	0.904649	2.6294e-10	-2.466	5.86095e-74	-0.736912	9.37022e-08
AN3101	phkB	Putative histidine-containing phosphotransfer protein		-0.749957	9.02898e-10	-0.293542	0.024233	-1.1678	3.60115e-23	-0.711389	5.04371e-09
AN3102	phkA	Putative histidine-containing phosphotransfer protein		-0.161792	0.197558	0.150896	0.214846	-0.832695	2.18091e-15	-0.520007	1.43242e-06
AN3214	hk-8-5	Putative histidine-containing phosphotransfer protein		-0.0241914	0.906153	-0.00919425	0.966918	-0.514355	0.000305248	-0.499358	0.000496133
AN3688	srrA	Response regulator, part of a two-component signal transduction system involved in control of stress response and conidiation; transcript induced by hydrogen peroxide		-0.53658	1.14123e-07	0.0634742	0.617534	-0.78389	9.32385e-16	-0.183835	0.0988085
AN4113	hk-8-2	Histidine kinase, histidine-containing phosphotransfer protein; expression upregulated after exposure to farnesol; palA-dependent expression independent of pH		-0.558357	1.48405e-05	0.95889	7.10488e-14	-3.12289	1.1707e-143	-1.60564	8.31427e-40
AN4134	srrC	Putative kinase response regulator of a two-component phosphorelay system		0.0211389	0.937824	0.497989	0.00569639	-0.0930526	0.667757	0.383798	0.0396958
AN4447	hk-9	Putative histidine-containing phosphotransfer protein		-0.0725942	0.701361	0.352819	0.0169413	-0.604939	1.70603e-05	-0.179525	0.266495
AN4479	nikA	Putative histidine-specific protein kinase, part of a two-component signal transduction phosphorelay system involved in response to fungicides; mutant has a strong growth defect		-0.0416096	0.717562	-0.00581787	0.965015	-0.602621	3.81059e-13	-0.56683	1.03064e-11
AN4818	hk-8-4	Putative histidine-containing phosphotransfer protein		-0.255526	0.0197657	-0.0932924	0.441058	-0.541962	5.70171e-08	-0.379728	0.000245838
AN5296	tcsA	Two-component signaling protein with histidine kinase and response regulator domains; involved in control of conidiation		-0.168808	0.154011	0.389596	0.000174666	-0.485834	2.17308e-06	0.0725699	0.57201
AN6820	hk-8-3	Putative histidine-containing phosphotransfer protein		0.365259	0.000225101	1.05045	3.55009e-23	-2.4744	5.7547e-133	-1.78921	8.17943e-82
AN7572	srrB	Putative response regulator of a two-component phosphorelay system; mutants sensitive to NaCl		0.0573833	0.726809	-0.152437	0.276431	-0.625213	2.08939e-07	-0.835033	2.41877e-12
AN7697	sskA	Response regulator, part of a two-component signal transducer involved in the HOG signaling pathway that regulates osmotic stress response; transcript induced by hydrogen peroxide; null spores are heat labile and lose viability at 4 degrees		-0.262707	0.268218	0.0277979	0.923704	-0.790906	7.78899e-05	-0.500401	0.01829
AN7945	hk2	Putative histidine-containing phosphotransfer protein		-0.196534	0.524212	0.869889	0.00369693	-2.23397	1.38694e-16	-1.16755	4.89486e-06
AN9008	fphA	Phytochrome photoreceptor, a red-light sensor that represses sexual development under red light; activator of polarized growth in the dark; binds chromophore biliverdin; interacts with VeA and LreB		0.151595	0.24329	0.613865	1.52633e-08	-0.351815	0.00181424	0.110456	0.398388
AN9048	hk-8-7	Putative histidine-containing phosphotransfer protein		0.466916	0.00404506	1.42928	1.92179e-20	-0.953631	3.56118e-09	0.00872857	0.96752
number of genes in the group:			20
up-regulated genes in the group:				2		10		0		1
down-regulated genes in the group:				6		1		18		13
stress responsive/AtfA-dependent genes in the group:				8		11		18		14
number of the studied genes:			10748
up-regulated genes (total):				1875		2482		2840		2487
down-regulated genes (total):				1985		2514		2643		2386
stress responsive genes (total):				3860		4996		5483		4873
p-value for up-regulated genes (Fisher's exact test):				0.8872		0.00772		1		0.9949
p-value for down-regulated genes (Fisher's exact test):				0.1485		0.9952		1.161e-09		4.847e-05
p-value for stress responsive/AtfA-dependent genes (Fisher's exact test):				0.4328		0.2939		0.0002755		0.02294
Glycolysis genes
GENE ID	Gene name	Feature (AspGD)	Description	log2FC	adj. p-value	log2FC	adj. p-value	log2FC	adj. p-value	log2FC	adj. p-value
				reference strain, Cd treated vs.	reference strain, untreated	DatfA mutant, Cd treated vs.	DatfA mutant, untreated	DatfA mutant, untreated vs.	reference strain, untreated	DatfA mutant, Cd treated vs.	reference strain, Cd treated
AN8689	glkA	Putative glucokinase; ORF that was absent from the original release of version 4 of the A. nidulans annotation, but present in a previous version; reinstated into version 4 in AspGD as of July 2009	Glucokinase	-0.622302	5.04704e-06	-0.178624	0.234088	-0.495746	0.000212061	-0.0520671	0.772387
AN7459	hxkA	Putative hexokinase with a predicted role in carbohydrate metabolism	Hexokinase	-0.61022	1.6225e-15	-0.0808191	0.358038	0.56294	3.22335e-14	1.09234	1.86076e-50
AN2638	hxkB	Putative hexokinase with a predicted role in carbohydrate metabolism	Hexokinase	0.535979	0.611601	2.75311	0.119419	-5.2567	0.000364327	-3.03957	0.00559573
AN4255	hxkC	Non-catalytic atypical hexokinase involved in regulation of extracellular proteases in response to carbon starvation; associates with mitochondria	Hexokinase	-0.874987	9.57651e-05	-1.22291	1.31817e-08	-0.211266	0.386161	-0.559185	0.0161134
AN2180	xprF	Non-catalytic hexokinase-like protein involved in regulation of extracellular proteases in response to carbon starvation; localized in nucleus	Hexokinase	0.673811	4.48388e-09	1.1251	1.40548e-25	0.235192	0.0515837	0.686485	3.18054e-10
AN6037	swoM	Putative glucose-6-phosphate isomerase with a predicted role in gluconeogenesis and glycolysis; mutant defective in hyphal polarity and conidiation	Glucose-6-phosphate isomerase	0.291927	8.99761e-05	0.371328	1.99392e-07	-0.238022	0.00111658	-0.158621	0.0401829
AN3223	pfkA	Putative 6-phosphofructokinase with a predicted role in gluconeogenesis and glycolysis; upregulated under hypoxic growth conditions	6-Phosphofructokinase	0.336945	0.0302253	0.40576	0.00567642	-0.151368	0.342396	-0.0825532	0.65155
AN2875	fbaA	Putative fructose-bisphosphate aldolase with a predicted role in gluconeogenesis and glycolysis; intracellular, menadione stress-induced protein; palA-dependent expression independent of pH	Fructose-bisphosphate aldolase	-1.13438	1.43775e-24	-0.666794	2.28179e-09	-0.0143524	0.919935	0.453236	8.23676e-05
AN6900	tpiA	Putative triose-phosphate isomerase with a predicted role in gluconeogenesis and glycolysis; protein induced by farnesol	Triose-phosphate isomerase	-0.367539	7.17558e-05	-0.174088	0.0695007	0.577705	3.21912e-11	0.771156	4.51602e-19
AN5908	tpiB	Putative triose-phosphate isomerase with a predicted role in glycolysis	Triose-phosphate isomerase	-0.372596	0.00144178	0.362006	0.00148169	-0.682547	3.71394e-10	0.0520551	0.724503
AN8041	gpdA	Glyceraldehyde-3-phosphate dehydrogenase with a predicted role in gluconeogenesis and glycolysis; the gpdA promoter is a commonly used regulatory sequence for driving constitutive heterologous gene expression	Glyceraldehyde-3-phosphate dehydrogenase	-0.212644	0.0457388	0.205111	0.0457258	-0.260056	0.00847238	0.157699	0.143168
AN2583	gpdC	Putative glyceraldehyde-3-phosphate dehydrogenase with a predicted role in gluconeogenesis and glycolysis	Glyceraldehyde-3-phosphate dehydrogenase	-0.384695	0.177233	0.106986	0.711548	0.398632	0.112942	0.890312	0.000211855
AN1246	pgkA	Putative phosphoglycerate kinase with a predicted role in gluconeogenesis and glycolysis; intracellular, menadione stress-induced protein; promoter activity is greater on gluconeogenic than on glycolytic carbon sources	Phosphoglycerate kinase	-0.418552	0.000280607	-0.215321	0.0711324	0.122703	0.32206	0.325934	0.00472461
AN3059	pgmA	Putative phosphoglycerate mutase with a predicted role in gluconeogenesis and glycolysis; expression upregulated after exposure to farnesol	Phosphoglycerate mutase	-1.11223	4.86692e-20	-0.213866	0.111529	-0.254718	0.0487849	0.64365	1.56926e-07
AN5746	acuN	Putative phosphopyruvate hydratase with a predicted role in gluconeogenesis and glycolysis; intracellular; protein abundance decreased by menadione stress; protein induced by farnesol	Phosphopyruvate hydratase	-0.497842	8.61167e-07	-0.243602	0.0195846	-0.25163	0.014116	0.00260862	0.985701
AN5210	pkiA	Putative pyruvate kinase with a predicted role in gluconeogenesis and glycolysis; intracellular, menadione stress-induced protein	Pyruvate kinase	-0.0978348	0.361051	-0.562406	6.12734e-11	0.347885	7.30301e-05	-0.116686	0.248201
AN10844	fbpZ	Putative fructose-2,6-bisphosphate 2-phosphatase	Fructose-2,6-bisphosphate 2-phosphatase	-0.456298	0.00155668	-0.0741899	0.668332	-0.448865	0.00118523	-0.0667574	0.712634
AN5144	pfkZ	Putative 6-phosphofructo-2-kinase with a predicted role in mannose/mannitol, fructose, and sorbose/sorbitol metabolism	6-Phosphofructo 2-kinase	0.0794501	0.603117	0.458875	0.000103769	-1.28855	1.49901e-30	-0.909128	1.12604e-15
AN5842	ldhA	Putative L-lactate dehydrogenase with a predicted role in the methylglyoxal bypass	L-Lactate dehydrogenase	-0.455462	0.116594	0.00821193	0.977795	1.08137	1.36284e-06	1.54505	1.15845e-11
AN4888	pdcA	Putative pyruvate decarboxylase with a predicted role in pyruvate metabolism or penicillin biosynthesis; intracellular; protein abundance decreased by menadione stress	Pyruvate decarboxylase	0.121878	0.395929	0.507802	1.3696e-05	-0.483769	3.19074e-05	-0.0978459	0.497319
AN8396	pdcB	Putative pyruvate decarboxylase with a predicted role in pyruvate metabolism	Pyruvate decarboxylase	0.039927	0.86522	1.01717	9.8566e-11	-0.220837	0.220175	0.756403	2.10114e-06
number of genes in the group:			21
up-regulated genes in the group:				3		8		4		9
down-regulated genes in the group:				11		4		10		4
stress responsive/AtfA-dependent genes in the group:				14		12		14		13
number of the studied genes:			10748
up-regulated genes (total):				1875		2482		2840		2487
down-regulated genes (total):				1985		2514		2643		2386
stress responsive genes (total):				3860		4996		5483		4873
p-value for up-regulated genes (Fisher's exact test):				0.7358		0.08929		0.8456		0.03559
p-value for down-regulated genes (Fisher's exact test):				0.0004705		0.7594		0.0183		0.7178
p-value for stress responsive/AtfA-dependent genes (Fisher's exact test):				0.004035		0.223		0.1111		0.09583
