# Supplementary material for: AtfA-Independent Adaptation to the Toxic Heavy Metal Cadmium in Aspergillus nidulans
Source: Microorganisms. 2021 Jul 2;9(7):1433. doi: 10.3390/microorganisms9071433 (PMC8307709; doi:10.3390/microorganisms9071433)
Supplement: Supplementary file 1 [file microorganisms-09-01433-s001.zip › Table S6new.xlsx]

## Sheet: Overview
	Table S6 Results of the promoter analyses.
Aspergillus nidulans
	Sheet 1 – “Phosphorelay response regulator” genes
	Sheet 2 – “P-type ATPase” genes
	Sheet 3 – “Catalase” genes
	Sheet 4 – “Glycolysis” genes
	Sheet 5 – “Squalene - ergosterol pathway” genes
	Sheet 6 – “Folate cycle” genes
	Sheet 7 – “Asperfuranone secondary metabolite cluster” genes
Aspergillus fumigatus, Aspergillus niger, Aspergillus oryzaenidulans
	Sheet 8 – Summary of the results with A. fumigatus, A. niger and A. oryzae genes
	Sheet 9 – Results with the A. fumigatus genes
	Sheet 10 – Results with the A. niger genes
	Sheet 11 – Results with the A. oryzae genes

## Sheet: Phosphorelay response regulator
Table S6 Results of the promoter analyses.
Sheet 1 – “Phosphorelay response regulator” genes
Gene	GeneID	Transcription factor	Start position	End position	Dissimilarity	String	RE equally	RE query	Pozition of the TSS	Between TSS-1000 and TSS+50	Between TSS+50 and ATG	Between ATG-1500 and ATG if no TSS
tcsB	AN1800	CRE-BP2 [T01017]	-935	-927	2.905558	TGACGTAAT	0.01183	0.01208	-492	YES
tcsB	AN1800	ATF [T00051]	-935	-927	0.148604	TGACGTAAT	0.01183	0.01209	-492	YES
tcsB	AN1800	CREB [T00989]	-935	-926	3.195012	TGACGTAATG	0.02662	0.02624	-492	YES
tcsB	AN1800	ATF [T00049]	-935	-926	2.281833	TGACGTAATG	0.05325	0.05168	-492	YES				Phosphorelay response regulator genes				Number of sites
tcsB	AN1800	CREB [T00163]	-935	-927	0.715264	TGACGTAAT	0.01578	0.01601	-492	YES				GENE ID	Gene name	Feature (AspGD)		Between TSS-1000 and TSS+50	Between ATG and TSS+50	Between ATG-1500 and ATG if no TSS	Merge
tcsB	AN1800	CREB [T00164]	-935	-927	1.756161	TGACGTAAT	0.03550	0.03548	-492	YES				AN1800	tcsB	Transmembrane histidine kinase, part of a two-component signal transducer involved in the HOG signaling pathway that regulates osmotic stress response' transcript upregulated by growth in glycerol		1	0	0	1
tcsB	AN1800	ATF-2 [T00167]	-935	-927	0.947660	TGACGTAAT	0.02367	0.02387	-492	YES				AN2363	hk-8-6	Putative histidine-containing phosphotransfer protein		1	0	0	1
ypdA	AN2005	ATF [T00051]	-5871	-5863	1.928943	TGACGTTCT	0.44937	0.01076	-794					AN2581	hk-8-1	Putative histidine-containing phosphotransfer protein		0	0	0	0
ypdA	AN2005	ATF [T00049]	-5871	-5862	4.085055	TGACGTTCTG	0.75831	0.01198	-794					AN3101	phkB	Putative histidine-containing phosphotransfer protein		1	1	0	2
ypdA	AN2005	CREB [T00163]	-5871	-5863	2.049517	TGACGTTCT	0.53925	0.01293	-794					AN3102	phkA	Putative histidine-containing phosphotransfer protein		1	0	0	1
ypdA	AN2005	ATF-2 [T00167]	-5871	-5863	3.264815	TGACGTTCT	0.26962	0.00650	-794					AN3214	hk-8-5	Putative histidine-containing phosphotransfer protein		0	0	0	0
ypdA	AN2005	ATF-1 [T00968]	-3090	-3080	3.570366	CTGACGTGAGA	0.05055	0.00053	-794					AN4113	hk-8-2	Histidine kinase, histidine-containing phosphotransfer protein; expression upregulated after exposure to farnesol; palA-dependent expression independent of pH		1	0	0	1
ypdA	AN2005	ATF [T00051]	-3089	-3081	1.081886	TGACGTGAG	0.47184	0.01122	-794					AN4447	hk-9	Putative histidine-containing phosphotransfer protein		1	0	0	1
ypdA	AN2005	CREB [T00989]	-3089	-3080	3.440581	TGACGTGAGA	0.11796	0.00182	-794					AN4479	nikA	Putative histidine-specific protein kinase, part of a two-component signal transduction phosphorelay system involved in response to fungicides; mutant has a strong growth defect		0	0	0	0
ypdA	AN2005	ATF [T00049]	-3089	-3080	2.281833	TGACGTGAGA	0.30333	0.00482	-794					AN4818	hk-8-4	Putative histidine-containing phosphotransfer protein		0	0	0	0
ypdA	AN2005	CREB [T00163]	-3089	-3081	1.023508	TGACGTGAG	0.44937	0.01078	-794					AN5296	tcsA	Two-component signaling protein with histidine kinase and response regulator domains; involved in control of conidiation		0	0	0	0
ypdA	AN2005	CREB [T00164]	-3089	-3081	1.928635	TGACGTGAG	0.20222	0.00478	-794					AN6820	hk-8-3	Putative histidine-containing phosphotransfer protein		1	3	0	4
ypdA	AN2005	ATF-2 [T00167]	-3089	-3081	1.387236	TGACGTGAG	0.13481	0.00319	-794					AN7945	hk2	Putative histidine-containing phosphotransfer protein		2	1	0	3
ypdA	AN2005	ATF [T00051]	-2881	-2873	1.292192	TGACGTCGT	0.33703	0.00813	-794					AN9008	fphA	Phytochrome photoreceptor, a red-light sensor that represses sexual development under red light; activator of polarized growth in the dark; binds chromophore biliverdin; interacts with VeA and LreB		2	0	0	2
ypdA	AN2005	ATF [T00049]	-2881	-2872	2.042527	TGACGTCGTT	0.23592	0.00370	-794					AN9048	hk-8-7	Putative histidine-containing phosphotransfer protein		0	0	0	0
ypdA	AN2005	CREB [T00163]	-2881	-2873	1.026008	TGACGTCGT	0.44937	0.01078	-794					AN4134	srrC	Putative kinase response regulator of a two-component phosphorelay system		0	0	0	0
ypdA	AN2005	CREB [T00164]	-2881	-2873	3.479544	TGACGTCGT	0.11234	0.00274	-794					AN7697	sskA	Response regulator, part of a two-component signal transducer involved in the HOG signaling pathway that regulates osmotic stress response; transcript induced by hydrogen peroxide; null spores are heat labile and lose viability at 4 degrees		0	0	0	0
ypdA	AN2005	ATF-2 [T00167]	-2881	-2873	2.046940	TGACGTCGT	0.26962	0.00652	-794					AN2005	ypdA	Histidine-containing phosphotransfer protein, part of a two-component signal transducer involved in the HOG signaling pathway that regulates osmotic stress response		2	0	0	2
ypdA	AN2005	ATF [T00051]	-2861	-2853	1.780339	TGACGTTCC	0.44937	0.01076	-794					AN3688	srrA	Response regulator, part of a two-component signal transduction system involved in control of stress response and conidiation; transcript induced by hydrogen peroxide		0	1	0	1
ypdA	AN2005	ATF [T00049]	-2861	-2852	3.845748	TGACGTTCCT	0.75831	0.01198	-794					AN7572	srrB	Putative response regulator of a two-component phosphorelay system; mutants sensitive to NaCl		0	0	1	1
ypdA	AN2005	CREB [T00163]	-2861	-2853	2.041286	TGACGTTCC	0.53925	0.01293	-794								S	13	6	1	20
ypdA	AN2005	ATF-2 [T00167]	-2861	-2853	3.230561	TGACGTTCC	0.49431	0.01177	-794											Sites/genes:	1
ypdA	AN2005	ATF [T00049]	-1187	-1178	3.845748	AACTACGTCA	0.75831	0.01198	-794	YES
ypdA	AN2005	ATF [T00051]	-1186	-1178	0.978321	ACTACGTCA	0.47184	0.01122	-794	YES
ypdA	AN2005	CREB [T00163]	-1186	-1178	1.708347	ACTACGTCA	0.26962	0.00641	-794	YES
ypdA	AN2005	ATF-2 [T00167]	-1186	-1178	2.960346	ACTACGTCA	0.49431	0.01177	-794	YES
ypdA	AN2005	ATF [T00051]	-1030	-1022	1.928943	TGACGTGCT	0.44937	0.01076	-794	YES
ypdA	AN2005	ATF [T00049]	-1030	-1021	4.085055	TGACGTGCTG	0.75831	0.01198	-794	YES
ypdA	AN2005	CREB [T00163]	-1030	-1022	2.049517	TGACGTGCT	0.53925	0.01293	-794	YES
ypdA	AN2005	ATF-2 [T00167]	-1030	-1022	3.417049	TGACGTGCT	0.26962	0.00650	-794	YES
hk-8-6	AN2363	ATF-1 [T00968]	-902	-892	4.602045	CTGACGTGGGC	0.01724	0.01756	-791	YES
hk-8-6	AN2363	ATF [T00051]	-901	-893	1.911603	TGACGTGGG	0.13138	0.13177	-791	YES
hk-8-6	AN2363	ATF [T00049]	-901	-892	4.085055	TGACGTGGGC	0.22170	0.22170	-791	YES
hk-8-6	AN2363	CREB [T00163]	-901	-893	2.016592	TGACGTGGG	0.15765	0.15891	-791	YES
hk-8-6	AN2363	ATF-2 [T00167]	-901	-893	3.399922	TGACGTGGG	0.07883	0.08141	-791	YES
phkB	AN3101	ATF [T00049]	-752	-743	4.085055	TACTACGTCA	0.12875	0.10268	-222	YES
phkB	AN3101	CREB [T00163]	-751	-743	1.708347	ACTACGTCA	0.04578	0.03473	-222	YES
phkB	AN3101	ATF-2 [T00167]	-751	-743	2.960346	ACTACGTCA	0.08392	0.06571	-222	YES
phkB	AN3101	ATF [T00051]	-751	-743	0.978321	ACTACGTCA	0.08011	0.06224	-222	YES
phkB	AN3101	ATF [T00049]	-135	-126	4.085055	TGACGTTCCC	0.12875	0.10268	-222		YES
phkB	AN3101	CREB [T00163]	-135	-127	2.041286	TGACGTTCC	0.09155	0.07386	-222		YES
phkB	AN3101	ATF-2 [T00167]	-135	-127	3.230561	TGACGTTCC	0.08392	0.06571	-222		YES
phkB	AN3101	ATF [T00051]	-135	-127	1.780339	TGACGTTCC	0.07629	0.06125	-222		YES
phkA	AN3102	ATF [T00049]	-3360	-3351	4.085055	GGGAACGTCA	0.44907	0.44561	-57
phkA	AN3102	CREB [T00163]	-3359	-3351	2.041286	GGAACGTCA	0.31934	0.31728	-57
phkA	AN3102	ATF-2 [T00167]	-3359	-3351	3.230561	GGAACGTCA	0.29272	0.28968	-57
phkA	AN3102	ATF [T00051]	-3359	-3351	1.780339	GGAACGTCA	0.26611	0.26420	-57
phkA	AN3102	ATF [T00049]	-2743	-2734	4.085055	TGACGTAGTA	0.44907	0.44561	-57
phkA	AN3102	CREB [T00163]	-2743	-2735	1.708347	TGACGTAGT	0.15967	0.15765	-57
phkA	AN3102	ATF-2 [T00167]	-2743	-2735	2.960346	TGACGTAGT	0.29272	0.28968	-57
phkA	AN3102	ATF [T00051]	-2743	-2735	0.978321	TGACGTAGT	0.27942	0.27617	-57
phkA	AN3102	ATF [T00049]	-866	-857	2.281833	GCTAACGTCA	0.17963	0.17879	-57	YES
phkA	AN3102	CREB [T00989]	-866	-857	3.198108	GCTAACGTCA	0.08981	0.08888	-57	YES
phkA	AN3102	CREB [T00163]	-865	-857	1.023508	CTAACGTCA	0.26611	0.26457	-57	YES
phkA	AN3102	CREB [T00164]	-865	-857	2.140726	CTAACGTCA	0.11975	0.11798	-57	YES
phkA	AN3102	ATF-2 [T00167]	-865	-857	1.235002	CTAACGTCA	0.07983	0.07860	-57	YES
phkA	AN3102	ATF [T00051]	-865	-857	1.081886	CTAACGTCA	0.27942	0.27617	-57	YES
hk-8-2	AN4113	ATF [T00051]	-123	-115	1.126925	TGACGTAGG	0.04774	0.04682	-77	YES
hk-8-2	AN4113	ATF [T00049]	-123	-114	4.085055	TGACGTAGGC	0.07673	0.07496	-77	YES
hk-8-2	AN4113	CREB [T00163]	-123	-115	1.675422	TGACGTAGG	0.02728	0.02672	-77	YES
hk-8-2	AN4113	ATF-2 [T00167]	-123	-115	2.943219	TGACGTAGG	0.05002	0.05105	-77	YES
hk-9	AN4447	ATF [T00051]	-214	-206	1.126925	TGACGTAGG	0.05487	0.04818	-58	YES
hk-9	AN4447	ATF [T00049]	-214	-205	3.845748	TGACGTAGGT	0.08819	0.07862	-58	YES
hk-9	AN4447	CREB [T00163]	-214	-206	1.675422	TGACGTAGG	0.03136	0.02720	-58	YES
hk-9	AN4447	ATF-2 [T00167]	-214	-206	2.943219	TGACGTAGG	0.05749	0.04999	-58	YES
hk-8-3	AN6820	ATF [T00051]	-859	-851	1.144264	TGACGTACT	0.08764	0.09010	-579	YES
hk-8-3	AN6820	ATF [T00049]	-859	-850	4.085055	TGACGTACTC	0.14085	0.13455	-579	YES
hk-8-3	AN6820	CREB [T00163]	-859	-851	1.708347	TGACGTACT	0.05008	0.05158	-579	YES
hk-8-3	AN6820	ATF-2 [T00167]	-859	-851	2.960346	TGACGTACT	0.09181	0.09291	-579	YES
hk-8-3	AN6820	ATF [T00049]	-291	-282	4.085055	TCCTACGTCA	0.14085	0.13455	-579		YES
hk-8-3	AN6820	ATF [T00051]	-290	-282	1.126925	CCTACGTCA	0.08764	0.09010	-579		YES
hk-8-3	AN6820	CREB [T00163]	-290	-282	1.675422	CCTACGTCA	0.05008	0.05158	-579		YES
hk-8-3	AN6820	ATF-2 [T00167]	-290	-282	2.943219	CCTACGTCA	0.09181	0.09291	-579		YES
hk-8-3	AN6820	ATF-1 [T00968]	-261	-251	3.768998	CTTGACGTCAC	0.00939	0.00833	-579		YES
hk-8-3	AN6820	CREB [T00989]	-261	-252	0.354420	CTTGACGTCA	0.01252	0.01258	-579		YES
hk-8-3	AN6820	ATF [T00049]	-261	-252	0.239306	CTTGACGTCA	0.00730	0.00759	-579		YES
hk-8-3	AN6820	ATF [T00051]	-260	-252	0.536777	TTGACGTCA	0.02087	0.02039	-579		YES
hk-8-3	AN6820	ATF-1 [T00968]	-260	-250	3.638741	TTGACGTCACC	0.00939	0.00801	-579		YES
hk-8-3	AN6820	CREB [T00163]	-260	-252	0.024694	TTGACGTCA	0.01669	0.01599	-579		YES
hk-8-3	AN6820	CREB [T00164]	-260	-252	0.019809	TTGACGTCA	0.01669	0.01599	-579		YES
hk-8-3	AN6820	ATF-2 [T00167]	-260	-252	0.051381	TTGACGTCA	0.01669	0.01599	-579		YES
hk-8-3	AN6820	CRE-BP2 [T01017]	-260	-252	0.467691	TTGACGTCA	0.01252	0.01240	-579		YES
hk-8-3	AN6820	ATF [T00051]	-259	-251	0.313871	TGACGTCAC	0.02087	0.02039	-579		YES
hk-8-3	AN6820	CREB [T00989]	-259	-250	0.121236	TGACGTCACC	0.00417	0.00342	-579		YES
hk-8-3	AN6820	ATF [T00049]	-259	-250	0.478612	TGACGTCACC	0.00939	0.00840	-579		YES
hk-8-3	AN6820	CREB [T00163]	-259	-251	0.024694	TGACGTCAC	0.01669	0.01599	-579		YES
hk-8-3	AN6820	CREB [T00164]	-259	-251	0.000000	TGACGTCAC	0.01669	0.01599	-579		YES
hk-8-3	AN6820	ATF-2 [T00167]	-259	-251	0.000000	TGACGTCAC	0.01669	0.01599	-579		YES
hk-8-3	AN6820	CRE-BP2 [T01017]	-259	-251	0.000000	TGACGTCAC	0.00417	0.00360	-579		YES
hk-8-3	AN6820	ATF-1 [T00968]	-116	-106	4.602045	GCCCACGTCAG	0.01095	0.00995	-579		YES
hk-8-3	AN6820	ATF [T00049]	-116	-107	4.085055	GCCCACGTCA	0.14085	0.13455	-579		YES
hk-8-3	AN6820	ATF [T00051]	-115	-107	1.911603	CCCACGTCA	0.08347	0.07941	-579		YES
hk-8-3	AN6820	CREB [T00163]	-115	-107	2.016592	CCCACGTCA	0.10016	0.09399	-579		YES
hk-8-3	AN6820	ATF-2 [T00167]	-115	-107	3.399922	CCCACGTCA	0.05008	0.04384	-579		YES
hk2	AN7945	ATF [T00051]	-1250	-1242	1.911603	TGACGTTTG	0.12321	0.12266	-729	YES
hk2	AN7945	ATF [T00049]	-1250	-1241	4.085055	TGACGTTTGA	0.20792	0.20722	-729	YES
hk2	AN7945	CREB [T00163]	-1250	-1242	1.851078	TGACGTTTG	0.14786	0.14684	-729	YES
hk2	AN7945	ATF-2 [T00167]	-1250	-1242	3.046419	TGACGTTTG	0.13554	0.13650	-729	YES
hk2	AN7945	ATF [T00049]	-1009	-1000	4.085055	GCGTACGTCA	0.20792	0.20722	-729	YES
hk2	AN7945	ATF [T00051]	-1008	-1000	1.292868	CGTACGTCA	0.09241	0.09044	-729	YES
hk2	AN7945	CREB [T00163]	-1008	-1000	1.675422	CGTACGTCA	0.07393	0.07473	-729	YES
hk2	AN7945	ATF-2 [T00167]	-1008	-1000	2.943219	CGTACGTCA	0.13554	0.13650	-729	YES
hk2	AN7945	ATF [T00049]	-178	-169	3.845748	AACTACGTCA	0.20792	0.20722	-729		YES
hk2	AN7945	ATF [T00051]	-177	-169	0.978321	ACTACGTCA	0.12938	0.13067	-729		YES
hk2	AN7945	CREB [T00163]	-177	-169	1.708347	ACTACGTCA	0.07393	0.07473	-729		YES
hk2	AN7945	ATF-2 [T00167]	-177	-169	2.960346	ACTACGTCA	0.13554	0.13650	-729		YES
fphA	AN9008	ATF [T00049]	-2482	-2473	4.085055	GAATACGTCA	0.33345	0.32920	-80
fphA	AN9008	CREB [T00163]	-2481	-2473	1.542833	AATACGTCA	0.11856	0.11923	-80
fphA	AN9008	CREB [T00164]	-2481	-2473	4.865358	AATACGTCA	0.14820	0.15031	-80
fphA	AN9008	ATF-2 [T00167]	-2481	-2473	2.759078	AATACGTCA	0.21736	0.21824	-80
fphA	AN9008	ATF [T00051]	-2481	-2473	0.978321	AATACGTCA	0.20748	0.20858	-80
fphA	AN9008	ATF [T00049]	-922	-913	4.085055	TGACGTGCTA	0.33345	0.32920	-80	YES
fphA	AN9008	CREB [T00163]	-922	-914	2.049517	TGACGTGCT	0.23712	0.23317	-80	YES
fphA	AN9008	ATF-2 [T00167]	-922	-914	3.417049	TGACGTGCT	0.11856	0.11414	-80	YES
fphA	AN9008	ATF [T00051]	-922	-914	1.928943	TGACGTGCT	0.19760	0.19497	-80	YES
fphA	AN9008	ATF [T00049]	-637	-628	1.803221	TGACGTCGAT	0.10374	0.10535	-80	YES
fphA	AN9008	CREB [T00163]	-637	-629	1.017777	TGACGTCGA	0.19760	0.19355	-80	YES
fphA	AN9008	CREB [T00164]	-637	-629	3.439926	TGACGTCGA	0.04940	0.04593	-80	YES
fphA	AN9008	ATF-2 [T00167]	-637	-629	2.064067	TGACGTCGA	0.11856	0.11329	-80	YES
fphA	AN9008	ATF [T00051]	-637	-629	1.366494	TGACGTCGA	0.14820	0.14239	-80	YES
srrA	AN3688	ATF [T00049]	-1860	-1851	3.845748	ACGCACGTCA	0.25839	0.25389	-645
srrA	AN3688	CREB [T00163]	-1859	-1851	2.016592	CGCACGTCA	0.18375	0.17911	-645
srrA	AN3688	ATF-2 [T00167]	-1859	-1851	3.399922	CGCACGTCA	0.09187	0.08632	-645
srrA	AN3688	ATF [T00051]	-1859	-1851	2.077547	CGCACGTCA	0.15312	0.15026	-645
srrA	AN3688	ATF [T00049]	-270	-261	2.281833	TGACGTCCTG	0.10336	0.09865	-645		YES
srrA	AN3688	CREB [T00163]	-270	-262	1.026008	TGACGTCCT	0.15312	0.14826	-645		YES
srrA	AN3688	CREB [T00164]	-270	-262	3.790464	TGACGTCCT	0.02297	0.02079	-645		YES
srrA	AN3688	ATF-2 [T00167]	-270	-262	2.046940	TGACGTCCT	0.09187	0.08481	-645		YES
srrA	AN3688	ATF [T00051]	-270	-262	1.458136	TGACGTCCT	0.11484	0.10714	-645		YES
srrB	AN7572	ATF [T00051]	-3561	-3553	1.928943	TGACGTTCT	0.27588	0.27360	n.d.
srrB	AN7572	ATF [T00049]	-3561	-3552	4.085055	TGACGTTCTC	0.46555	0.46209	n.d.
srrB	AN7572	CREB [T00163]	-3561	-3553	2.049517	TGACGTTCT	0.33105	0.32750	n.d.
srrB	AN7572	ATF-2 [T00167]	-3561	-3553	3.264815	TGACGTTCT	0.16553	0.16146	n.d.
srrB	AN7572	ATF [T00049]	-428	-419	4.085055	TCAAACGTCA	0.46555	0.46209	n.d.			YES
srrB	AN7572	ATF [T00051]	-427	-419	1.911603	CAAACGTCA	0.27588	0.27360	n.d.			YES
srrB	AN7572	CREB [T00163]	-427	-419	1.851078	CAAACGTCA	0.33105	0.32750	n.d.			YES
srrB	AN7572	ATF-2 [T00167]	-427	-419	3.046419	CAAACGTCA	0.30347	0.30476	n.d.			YES

## Sheet: P-type ATPases
Table S6 Results of the promoter analyses.
Sheet 4 – “P-type ATPase” genes
Gene	GeneID	Transcription factor	Start position	End position	Dissimilarity	String	RE equally	RE query	Pozition of the TSS	Between TSS-1000 and TSS+50	Between TSS+50 and ATG	Between ATG-1500 and ATG if no TSS
pmcA	AN1189	ATF [T00049]	-1619	-1610	3.845748	AAACACGTCA	0.30822	0.30517	-1983		YES
pmcA	AN1189	CREB [T00163]	-1618	-1610	1.884003	AACACGTCA	0.21918	0.21675	-1983		YES
pmcA	AN1189	ATF-2 [T00167]	-1618	-1610	3.215780	AACACGTCA	0.20091	0.20395	-1983		YES
pmcA	AN1189	ATF [T00051]	-1618	-1610	1.762999	AACACGTCA	0.18265	0.18191	-1983		YES
dnfC	AN2011	ATF [T00049]	-211	-202	3.845748	TTGCACGTCA	0.35676	0.35294	-2185		YES			P-type ATPase genes				Number of sites
dnfC	AN2011	CREB [T00163]	-210	-202	2.041286	TGCACGTCA	0.25369	0.24935	-2185		YES			GENE ID	Gene name	Feature (AspGD)	Function	Between TSS-1000 and TSS+50	Between ATG and TSS+50	Between ATG-1500 and ATG if no TSS	Merge
dnfC	AN2011	ATF-2 [T00167]	-210	-202	3.434176	TGCACGTCA	0.12685	0.12165	-2185		YES			AN0318	AN0318	Putative plasma membrane ATPase with a predicted role in energy metabolism	H+ pupmp	0	0	0	0
dnfC	AN2011	ATF [T00051]	-210	-202	2.003245	TGCACGTCA	0.21141	0.20877	-2185		YES			AN10357	AN10357	Ortholog of A. fumigatus Af293 : Afu3g13810, A. niger CBS 513.88 : An02g09500, A. oryzae RIB40 : AO090012000774, Neosartorya fischeri NRRL 181 : NFIA_063450 and Aspergillus wentii : Aspwe1_0170040		0	0	0	0
dnfC	AN2011	ATF [T00049]	-156	-147	2.281833	CCTAACGTCA	0.14270	0.13853	-2185		YES			AN10367	AN10367	Putative P-type ATPase	Ca2+ pump	0	0	0	0
dnfC	AN2011	CREB [T00989]	-156	-147	3.076872	CCTAACGTCA	0.07135	0.07190	-2185		YES			AN10982	enaC	Putative P-type ATPase sodium pump	Na+ pupmp	0	0	0	0
dnfC	AN2011	CREB [T00163]	-155	-147	1.023508	CTAACGTCA	0.21141	0.20721	-2185		YES			AN1189	pmcA	Putative calcium-transporting vacuolar ATPase involved in calcium homeostasis; transcript induced in response to calcium dichloride in a CrzA-dependent manner	Ca2+ pump	0	1	0	1
dnfC	AN2011	CREB [T00164]	-155	-147	2.140726	CTAACGTCA	0.09513	0.09863	-2185		YES			AN1628	enaB	Putative membrane ATPase with a predicted role in energy metabolism	Na+ pupmp	0	0	0	0
dnfC	AN2011	ATF-2 [T00167]	-155	-147	1.235002	CTAACGTCA	0.06342	0.06678	-2185		YES			AN2011	dnfC	Putative flippase, type 4 P-type ATPase involved in distribution lipids	flipase	0	2	0	2
dnfC	AN2011	ATF [T00051]	-155	-147	1.081886	CTAACGTCA	0.22198	0.22535	-2185		YES			AN2827	AN2827	Putative potassium-transporting ATPase with a predicted role in energy metabolism	K+ pump	0	0	0	0
pmcB	AN4920	ATF [T00049]	-782	-773	2.042527	AGTAACGTCA	0.06589	0.06295	-781	YES				AN3117	crpA	Ortholog(s) have copper-exporting ATPase activity, role in cadmium ion transport, cellular copper ion homeostasis, copper ion transport, silver ion transport and plasma membrane localization	Cu2+/Cd2+ pump	0	0	0	0
pmcB	AN4920	CREB [T00989]	-782	-773	2.961828	AGTAACGTCA	0.04236	0.04125	-781	YES				AN3624	ygA	Protein required for conidia pigmentation, predicted to act as a copper transporter; mutants produce yellow conidia at high pH and green conidia at low pH	Cu2+ pump	0	0	0	0
pmcB	AN4920	CREB [T00163]	-781	-773	1.048202	GTAACGTCA	0.12550	0.12606	-781	YES				AN4859	pmaA	Plasma membrane ATPase with a predicted role in energy metabolism	H+ pupmp	0	0	0	0
pmcB	AN4920	CREB [T00164]	-781	-773	2.120918	GTAACGTCA	0.05648	0.05339	-781	YES				AN4920	pmcB	Putative calcium-transporting mitochondrial ATPase involved in calcium homeostasis	Ca2+ pump	1	0	0	1
pmcB	AN4920	ATF-2 [T00167]	-781	-773	1.217875	GTAACGTCA	0.03765	0.03483	-781	YES				AN5088	AN5088	Putative potassium-transporting ATPase with a predicted role in energy metabolism	K+ pump	0	2	0	2
pmcB	AN4920	CRE-BP2 [T01017]	-781	-773	4.875734	GTAACGTCA	0.01255	0.01235	-781	YES				AN5743	AN5743	Putative potassium-transporting ATPase with a predicted role in energy metabolism	K+ pump	0	0	0	0
pmcB	AN4920	ATF [T00051]	-781	-773	0.784678	GTAACGTCA	0.13178	0.12737	-781	YES				AN6112	dnfB	Flippase, type 4 P-type ATPase involved in distribution of phosphatidylserine	flipase	0	0	0	0
	AN5088	ATF-1 [T00968]	-1615	-1605	5.741303	ATGACGTCGTA	0.05865	0.05435	-2454		YES			AN6614	dnfD	Putative flippase, type 4 P-type ATPase involved in distribution lipids	flipase	0	0	0	0
	AN5088	ATF [T00051]	-1614	-1606	1.292192	TGACGTCGT	0.22705	0.21236	-2454		YES			AN6642	enaA	Putative potassium-transporting ATPase with a predicted role in energy metabolism; locus contains the conserved upstream open reading frames (uORFs) AN6642-uORF and AN6642-uORF.2	Na+/K+ pump	0	0	1	1
	AN5088	ATF [T00049]	-1614	-1605	2.281833	TGACGTCGTA	0.20435	0.19502	-2454		YES			AN7464	pmrA	Putative calcium-transporting ATPase with a predicted role in energy metabolism; putative secretory pathway component; up-regulated under osmotic stress conditions	Ca2+ pump	0	0	0	0
	AN5088	CREB [T00163]	-1614	-1606	1.026008	TGACGTCGT	0.30273	0.29309	-2454		YES			AN8219	AN8219	Putative plasma membrane ATPase with a predicted role in energy metabolism	H+ pupmp	0	0	2	2
	AN5088	CREB [T00164]	-1614	-1606	3.479544	TGACGTCGT	0.07568	0.06692	-2454		YES			AN8399	AN8399	Putative potassium-transporting ATPase with a predicted role in energy metabolism; transcript induced in response to calcium dichloride in a CrzA-dependent manner	K+ pump	1	0	0	1
	AN5088	ATF-2 [T00167]	-1614	-1606	2.046940	TGACGTCGT	0.18164	0.16804	-2454		YES			AN8941	AN8941	Putative potassium-transporting ATPase (alpha 1 isoform) with a predicted role in energy metabolism	K+ pump	0	0	0	0
	AN5088	ATF [T00051]	-532	-524	0.978321	TGACGTAGT	0.31787	0.32245	-2454		YES						S	2	5	3	10
	AN5088	ATF [T00049]	-532	-523	3.845748	TGACGTAGTT	0.51086	0.50298	-2454		YES									Sites/genes:	0.47619
	AN5088	CREB [T00163]	-532	-524	1.708347	TGACGTAGT	0.18164	0.18445	-2454		YES
	AN5088	ATF-2 [T00167]	-532	-524	2.960346	TGACGTAGT	0.33301	0.33744	-2454		YES
enaA	AN6642	ATF [T00049]	-40	-31	2.042527	AGTAACGTCA	0.00224	0.00148	n.d.			YES
enaA	AN6642	CREB [T00989]	-40	-31	2.961828	AGTAACGTCA	0.00144	0.00067	n.d.			YES
enaA	AN6642	CREB [T00163]	-39	-31	1.048202	GTAACGTCA	0.00427	0.00197	n.d.			YES
enaA	AN6642	CREB [T00164]	-39	-31	2.120918	GTAACGTCA	0.00192	0.00121	n.d.			YES
enaA	AN6642	ATF-2 [T00167]	-39	-31	1.217875	GTAACGTCA	0.00128	0.00084	n.d.			YES
enaA	AN6642	CRE-BP2 [T01017]	-39	-31	4.875734	GTAACGTCA	0.00043	0.00016	n.d.			YES
enaA	AN6642	ATF [T00051]	-39	-31	0.784678	GTAACGTCA	0.00449	0.00247	n.d.			YES
	AN8219	ATF [T00051]	-374	-366	1.218566	TGACGTACA	0.19226	0.19591	n.d.			YES
	AN8219	ATF [T00049]	-374	-365	3.845748	TGACGTACAG	0.30899	0.29477	n.d.			YES
	AN8219	CREB [T00163]	-374	-366	1.700116	TGACGTACA	0.10986	0.11205	n.d.			YES
	AN8219	ATF-2 [T00167]	-374	-366	2.977473	TGACGTACA	0.20142	0.20186	n.d.			YES
	AN8219	ATF-1 [T00968]	-195	-185	3.012247	TACGACGTCAG	0.00801	0.00651	n.d.			YES
	AN8219	ATF [T00049]	-195	-186	2.281833	TACGACGTCA	0.12360	0.11303	n.d.			YES
	AN8219	ATF [T00051]	-194	-186	1.292192	ACGACGTCA	0.13733	0.11952	n.d.			YES
	AN8219	CREB [T00163]	-194	-186	1.026008	ACGACGTCA	0.18311	0.17114	n.d.			YES
	AN8219	CREB [T00164]	-194	-186	3.479544	ACGACGTCA	0.04578	0.03617	n.d.			YES
	AN8219	ATF-2 [T00167]	-194	-186	2.046940	ACGACGTCA	0.10986	0.09407	n.d.			YES
	AN8399	ATF [T00051]	-652	-644	1.081886	TGACGTTAG	0.07050	0.07068	-543	YES
	AN8399	CREB [T00989]	-652	-643	3.198108	TGACGTTAGT	0.02266	0.02271	-543	YES
	AN8399	ATF [T00049]	-652	-643	2.042527	TGACGTTAGT	0.03525	0.03537	-543	YES
	AN8399	CREB [T00163]	-652	-644	1.023508	TGACGTTAG	0.06714	0.06640	-543	YES
	AN8399	CREB [T00164]	-652	-644	2.140726	TGACGTTAG	0.03021	0.03055	-543	YES
	AN8399	ATF-2 [T00167]	-652	-644	1.235002	TGACGTTAG	0.02014	0.02042	-543	YES

## Sheet: Catalases
Table S6 Results of the promoter analyses.
Sheet 2 – “Catalase” genes
Gene	GeneID	Transcription factor	Start position	End position	Dissimilarity	String	RE equally	RE query	Pozition of the TSS	Between TSS-1000 and TSS+50	Between TSS+50 and ATG	Between ATG-1500 and ATG if no TSS
catA	AN8637	ATF [T00049]	-476	-467	2.042527	CTAGACGTCA	0.02403	0.02428	-430	YES
catA	AN8637	ATF-1 [T00968]	-476	-466	4.426433	CTAGACGTCAT	0.00601	0.00581	-430	YES
catA	AN8637	CREB [T00163]	-475	-467	0.852263	TAGACGTCA	0.04578	0.04458	-430	YES
catA	AN8637	CREB [T00164]	-475	-467	3.129007	TAGACGTCA	0.00916	0.00903	-430	YES							Number of sites
catA	AN8637	ATF-2 [T00167]	-475	-467	1.862798	TAGACGTCA	0.02747	0.02595	-430	YES				catalase and peroxidase genes			Between TSS-1000 and TSS+50	Between ATG and TSS+50	Between ATG-1500 and ATG if no TSS	Merge
catA	AN8637	ATF [T00051]	-475	-467	1.366494	TAGACGTCA	0.03433	0.03276	-430	YES				AN8637	catA	Conidia-specific catalase; predicted role in gluconic acid and gluconate metabolism	1	0	0	1
catB	AN9339	ATF [T00051]	-377	-369	1.292868	TGACGTACG	0.08039	0.08154	-140	YES				AN9339	catB	Hyphal catalase with a predicted role in gluconic acid and gluconate metabolism	1	0	0	1
catB	AN9339	ATF [T00049]	-377	-368	3.845748	TGACGTACGT	0.18089	0.17866	-140	YES				AN5918	catC	Putative catalase with a predicted role in gluconic acid and gluconate metabolism	0	0	0	0
catB	AN9339	CREB [T00163]	-377	-369	1.675422	TGACGTACG	0.06432	0.06190	-140	YES				AN8553	AN8553	Putative catalase with a predicted role in gluconic acid and gluconate metabolism	0	0	0	0
catB	AN9339	ATF-2 [T00167]	-377	-369	2.943219	TGACGTACG	0.11791	0.11490	-140	YES				AN7388	cpeA	Putative catalase-peroxidase with a predicted role in gluconic acid and gluconate metabolism; protein also identified as laccase II which is expressed during sexual development	0	0	0	0
	AN8553	ATF [T00049]	-1441	-1432	3.845748	TTGTACGTCA	0.35083	0.34666	-72							S	2	0	0	2
	AN8553	CREB [T00163]	-1440	-1432	1.700116	TGTACGTCA	0.12474	0.12713	-72										Sites/genes:	0.4
	AN8553	ATF-2 [T00167]	-1440	-1432	2.977473	TGTACGTCA	0.22869	0.23123	-72
	AN8553	ATF [T00051]	-1440	-1432	1.218566	TGTACGTCA	0.21830	0.22221	-72

## Sheet: Glycolysis
Table S6 Results of the promoter analyses.
Sheet 3 – “Glycolysis” genes
Gene	GeneID	Transcription factor	Start position	End position	Dissimilarity	String	RE equally	RE query	Pozition of the TSS	Between TSS-1000 and TSS+50	Between TSS+50 and ATG	Between ATG-1500 and ATG if no TSS
gpdC	AN2583	ATF [T00049]	-973	-964	0.239306	CTTGACGTCA	0.00751	0.00763	-312	YES
gpdC	AN2583	ATF-1 [T00968]	-973	-963	4.678683	CTTGACGTCAA	0.01127	0.01101	-312	YES
gpdC	AN2583	CREB [T00989]	-973	-964	0.354420	CTTGACGTCA	0.01287	0.01296	-312	YES
gpdC	AN2583	CREB [T00163]	-972	-964	0.024694	TTGACGTCA	0.01717	0.01705	-312	YES
gpdC	AN2583	CREB [T00164]	-972	-964	0.019809	TTGACGTCA	0.01717	0.01705	-312	YES				Glycolysis genes				Number of sites
gpdC	AN2583	ATF-2 [T00167]	-972	-964	0.051381	TTGACGTCA	0.01717	0.01705	-312	YES				GENE ID	Gene name	Feature (AspGD)	Function	Between TSS-1000 and TSS+50	Between ATG and TSS+50	Between ATG-1500 and ATG if no TSS	Merge
gpdC	AN2583	CRE-BP2 [T01017]	-972	-964	0.467691	TTGACGTCA	0.01287	0.01290	-312	YES				AN8689	glkA	Putative glucokinase; ORF that was absent from the original release of version 4 of the A. nidulans annotation, but present in a previous version; reinstated into version 4 in AspGD as of July 2009	Glucokinase	0	0	0	0
gpdC	AN2583	ATF [T00051]	-972	-964	0.536777	TTGACGTCA	0.02146	0.02144	-312	YES				AN7459	hxkA	Putative hexokinase with a predicted role in carbohydrate metabolism	Hexokinase	0	0	0	0
gpdC	AN2583	ATF-1 [T00968]	-972	-962	4.678683	TTGACGTCAAA	0.01127	0.01101	-312	YES				AN2638	hxkB	Putative hexokinase with a predicted role in carbohydrate metabolism	Hexokinase	2	0	0	2
gpdC	AN2583	ATF [T00049]	-971	-962	0.239306	TGACGTCAAA	0.00751	0.00763	-312	YES				AN4255	hxkC	Non-catalytic atypical hexokinase involved in regulation of extracellular proteases in response to carbon starvation; associates with mitochondria	Hexokinase	0	0	0	0
gpdC	AN2583	CREB [T00163]	-971	-963	0.024694	TGACGTCAA	0.01717	0.01705	-312	YES				AN2180	xprF	Non-catalytic hexokinase-like protein involved in regulation of extracellular proteases in response to carbon starvation; localized in nucleus	Hexokinase	0	0	0	0
gpdC	AN2583	CREB [T00164]	-971	-963	0.019809	TGACGTCAA	0.01717	0.01705	-312	YES				AN6037	swoM	Putative glucose-6-phosphate isomerase with a predicted role in gluconeogenesis and glycolysis; mutant defective in hyphal polarity and conidiation	Glucose-6-phosphate isomerase	0	0	0	0
gpdC	AN2583	ATF-2 [T00167]	-971	-963	0.051381	TGACGTCAA	0.01717	0.01705	-312	YES				AN3223	pfkA	Putative 6-phosphofructokinase with a predicted role in gluconeogenesis and glycolysis; upregulated under hypoxic growth conditions	6-Phosphofructokinase	0	1	0	1
gpdC	AN2583	CRE-BP2 [T01017]	-971	-963	0.467691	TGACGTCAA	0.01287	0.01290	-312	YES				AN2875	fbaA	Putative fructose-bisphosphate aldolase with a predicted role in gluconeogenesis and glycolysis; intracellular, menadione stress-induced protein; palA-dependent expression independent of pH	Fructose-bisphosphate aldolase	0	0	0	0
gpdC	AN2583	ATF [T00051]	-971	-963	0.536777	TGACGTCAA	0.02146	0.02144	-312	YES				AN6900	tpiA	Putative triose-phosphate isomerase with a predicted role in gluconeogenesis and glycolysis; protein induced by farnesol	Triose-phosphate isomerase	0	0	0	0
gpdC	AN2583	CREB [T00989]	-971	-962	0.718129	TGACGTCAAA	0.01287	0.01296	-312	YES				AN5908	tpiB	Putative triose-phosphate isomerase with a predicted role in glycolysis	Triose-phosphate isomerase	1	0	0	1
hxkB	AN2638	ATF [T00051]	-542	-534	1.007584	TGACGTGAA	0.11383	0.11493	-36	YES				AN8041	gpdA	Glyceraldehyde-3-phosphate dehydrogenase with a predicted role in gluconeogenesis and glycolysis; the gpdA promoter is a commonly used regulatory sequence for driving constitutive heterologous gene expression	Glyceraldehyde-3-phosphate dehydrogenase	0	0	0	0
hxkB	AN2638	CREB [T00989]	-542	-533	3.195012	TGACGTGAAG	0.03659	0.03670	-36	YES				AN2583	gpdC	Putative glyceraldehyde-3-phosphate dehydrogenase with a predicted role in gluconeogenesis and glycolysis	Glyceraldehyde-3-phosphate dehydrogenase	1	0	0	1
hxkB	AN2638	ATF [T00049]	-542	-533	2.042527	TGACGTGAAG	0.05692	0.05802	-36	YES				AN1246	pgkA	Putative phosphoglycerate kinase with a predicted role in gluconeogenesis and glycolysis; intracellular, menadione stress-induced protein; promoter activity is greater on gluconeogenic than on glycolytic carbon sources	Phosphoglycerate kinase	0	0	0	0
hxkB	AN2638	CREB [T00163]	-542	-534	1.048202	TGACGTGAA	0.10841	0.10444	-36	YES				AN3059	pgmA	Putative phosphoglycerate mutase with a predicted role in gluconeogenesis and glycolysis; expression upregulated after exposure to farnesol	Phosphoglycerate mutase	1	0	0	1
hxkB	AN2638	CREB [T00164]	-542	-534	1.928635	TGACGTGAA	0.04879	0.05066	-36	YES				AN5746	acuN	Putative phosphopyruvate hydratase with a predicted role in gluconeogenesis and glycolysis; intracellular; protein abundance decreased by menadione stress; protein induced by farnesol	Phosphopyruvate hydratase	0	0	0	0
hxkB	AN2638	ATF-2 [T00167]	-542	-534	1.421491	TGACGTGAA	0.03252	0.03353	-36	YES				AN5210	pkiA	Putative pyruvate kinase with a predicted role in gluconeogenesis and glycolysis; intracellular, menadione stress-induced protein	Pyruvate kinase	0	0	0	0
hxkB	AN2638	ATF [T00051]	-461	-453	1.007584	TGACGTTAA	0.11383	0.11493	-36	YES				AN10844	fbpZ	Putative fructose-2,6-bisphosphate 2-phosphatase	Fructose-2,6-bisphosphate 2-phosphatase	0	0	0	0
hxkB	AN2638	CREB [T00989]	-461	-452	3.316248	TGACGTTAAC	0.02846	0.03122	-36	YES				AN5144	pfkZ	Putative 6-phosphofructo-2-kinase with a predicted role in mannose/mannitol, fructose, and sorbose/sorbitol metabolism	6-Phosphofructo 2-kinase	1	0	0	1
hxkB	AN2638	ATF [T00049]	-461	-452	2.042527	TGACGTTAAC	0.05692	0.05802	-36	YES				AN5842	ldhA	Putative L-lactate dehydrogenase with a predicted role in the methylglyoxal bypass	L-Lactate dehydrogenase	0	0	0	0
hxkB	AN2638	CREB [T00163]	-461	-453	1.048202	TGACGTTAA	0.10841	0.10444	-36	YES				AN4888	pdcA	Putative pyruvate decarboxylase with a predicted role in pyruvate metabolism or penicillin biosynthesis; intracellular; protein abundance decreased by menadione stress	Pyruvate decarboxylase	1	0	0	1
hxkB	AN2638	CREB [T00164]	-461	-453	2.140726	TGACGTTAA	0.04879	0.05066	-36	YES				AN8396	pdcB	Putative pyruvate decarboxylase with a predicted role in pyruvate metabolism	Pyruvate decarboxylase	0	0	0	0
hxkB	AN2638	ATF-2 [T00167]	-461	-453	1.269256	TGACGTTAA	0.03252	0.03353	-36	YES							S	7	1	0	8
fbaA	AN2875	ATF [T00049]	-2532	-2523	2.281833	TACGACGTCA	0.15053	0.14261	-286											Sites/genes:	0.380952
fbaA	AN2875	CREB [T00163]	-2531	-2523	1.026008	ACGACGTCA	0.22301	0.21481	-286
fbaA	AN2875	CREB [T00164]	-2531	-2523	3.479544	ACGACGTCA	0.05575	0.04770	-286
fbaA	AN2875	ATF-2 [T00167]	-2531	-2523	2.046940	ACGACGTCA	0.13380	0.12119	-286
fbaA	AN2875	ATF [T00051]	-2531	-2523	1.292192	ACGACGTCA	0.16726	0.15341	-286
pgmA	AN3059	ATF [T00051]	-284	-276	1.144264	TGACGTACT	0.03821	0.03842	-251	YES
pgmA	AN3059	ATF [T00049]	-284	-275	3.845748	TGACGTACTT	0.06141	0.06099	-251	YES
pgmA	AN3059	CREB [T00163]	-284	-276	1.708347	TGACGTACT	0.02184	0.02197	-251	YES
pgmA	AN3059	ATF-2 [T00167]	-284	-276	2.960346	TGACGTACT	0.04003	0.04040	-251	YES
pfkA	AN3223	ATF [T00051]	-199	-191	0.995660	TGACGTACC	0.07915	0.07795	-336		YES
pfkA	AN3223	ATF [T00049]	-199	-190	3.845748	TGACGTACCT	0.12720	0.12515	-336		YES
pfkA	AN3223	CREB [T00163]	-199	-191	1.700116	TGACGTACC	0.04523	0.04448	-336		YES
pfkA	AN3223	ATF-2 [T00167]	-199	-191	2.926092	TGACGTACC	0.08292	0.08154	-336		YES
pdcA	AN4888	ATF [T00051]	-137	-129	1.052623	TGACGTATA	0.04566	0.04614	-132	YES
pdcA	AN4888	ATF [T00049]	-137	-128	3.606442	TGACGTATAT	0.00489	0.00515	-132	YES
pdcA	AN4888	CREB [T00163]	-137	-129	1.534602	TGACGTATA	0.02609	0.02638	-132	YES
pdcA	AN4888	CREB [T00164]	-137	-129	4.825740	TGACGTATA	0.03262	0.03331	-132	YES
pdcA	AN4888	ATF-2 [T00167]	-137	-129	2.776205	TGACGTATA	0.04784	0.04823	-132	YES
pfkZ	AN5144	ATF [T00049]	-1157	-1148	4.085055	TCCCACGTCA	0.16994	0.16921	-390	YES
pfkZ	AN5144	CREB [T00163]	-1156	-1148	2.016592	CCCACGTCA	0.12085	0.12182	-390	YES
pfkZ	AN5144	ATF-2 [T00167]	-1156	-1148	3.399922	CCCACGTCA	0.06042	0.06335	-390	YES
pfkZ	AN5144	ATF [T00051]	-1156	-1148	1.911603	CCCACGTCA	0.10071	0.10075	-390	YES
tpiB	AN5908	CRE-BP2 [T01017]	-1064	-1056	2.905558	TGACGTAAG	0.02098	0.02025	-751	YES
tpiB	AN5908	ATF [T00051]	-1064	-1056	0.297208	TGACGTAAG	0.03496	0.03433	-751	YES
tpiB	AN5908	CREB [T00989]	-1064	-1055	3.076872	TGACGTAAGG	0.04720	0.04634	-751	YES
tpiB	AN5908	ATF [T00049]	-1064	-1055	2.281833	TGACGTAAGG	0.09440	0.09389	-751	YES
tpiB	AN5908	CREB [T00163]	-1064	-1056	0.682339	TGACGTAAG	0.02797	0.02702	-751	YES
tpiB	AN5908	CREB [T00164]	-1064	-1056	1.716543	TGACGTAAG	0.02098	0.02041	-751	YES
tpiB	AN5908	ATF-2 [T00167]	-1064	-1056	0.930533	TGACGTAAG	0.04195	0.04057	-751	YES
pdcB	AN8396	ATF [T00051]	-1374	-1366	1.928943	TGACGTGCT	0.35912	0.34723	-56
pdcB	AN8396	ATF [T00049]	-1374	-1365	4.085055	TGACGTGCTA	0.60601	0.58813	-56
pdcB	AN8396	CREB [T00163]	-1374	-1366	2.049517	TGACGTGCT	0.43094	0.41226	-56
pdcB	AN8396	ATF-2 [T00167]	-1374	-1366	3.417049	TGACGTGCT	0.21547	0.19581	-56

## Sheet: Squalene - ergosterol pathway
Table S6 Results of the promoter analyses.
Sheet 5 – “Squalene - ergosterol pathway” genes
Gene	GeneID	Transcription factor	Start position	End position	Dissimilarity	String	RE equally	RE query	Pozition of the TSS	Between TSS-1000 and TSS+50	Between TSS+50 and ATG	Between ATG-1500 and ATG if no TSS
	AN1147	ATF [T00049]	-1240	-1231	3.845748	TTCAACGTCA	0.19647	0.18593	n.d.			YES
	AN1147	CREB [T00163]	-1239	-1231	2.041286	TCAACGTCA	0.13971	0.13274	n.d.			YES		Squalene - ergosterol pathway genes				Number of sites
	AN1147	ATF-2 [T00167]	-1239	-1231	3.281942	TCAACGTCA	0.06985	0.06545	n.d.			YES		GENE ID	Gene name	Feature (AspGD)	Orthologues in A. fumigatus	Between TSS-1000 and TSS+50	Between ATG and TSS+50	Between ATG-1500 and ATG if no TSS	Merge
	AN1147	ATF [T00051]	-1239	-1231	1.837301	TCAACGTCA	0.11642	0.11052	n.d.			YES		AN0451	AN0451	Putative C-8 sterol isomerase with a predicted role in sterol metabolism	erg2	0	0	0	0
	AN2684	ATF [T00049]	-1649	-1640	2.281833	GGAGACGTCA	0.14538	0.14606	-80					AN1147	AN1147	Ortholog of A. fumigatus Af293 : Afu1g11500/erg27, A. niger CBS 513.88 : An08g03620, Aspergillus wentii : Aspwe1_0172221, Aspergillus sydowii : Aspsy1_0053214 and Aspergillus terreus NIH2624 : ATET_00340	erg27	0	0	1	1
	AN2684	ATF-1 [T00968]	-1649	-1639	4.296176	GGAGACGTCAA	0.02827	0.02837	-80					AN4094	AN4094	Putative C-14 sterol reductase with a predicted role in sterol metabolism	erg24 (erg24A) and erg24B	0	0	0	0
	AN2684	CREB [T00163]	-1648	-1640	0.852263	GAGACGTCA	0.21538	0.21585	-80					AN7146	AN7146	Putative S-adenosyl-methionine delta-24-sterol-C-methyltransferase with a predicted role in sterol metabolism	erg6	0	0	0	0
	AN2684	CREB [T00164]	-1648	-1640	3.109198	GAGACGTCA	0.04308	0.04300	-80					AN10648	AN10648	Ortholog(s) have delta24(24-1) sterol reductase activity, role in ergosterol biosynthetic process and endoplasmic reticulum localization	erg4 (erg4B)	0	0	0	0
	AN2684	ATF-2 [T00167]	-1648	-1640	1.811417	GAGACGTCA	0.12923	0.13053	-80					AN11065	AN11065	Putative oxidosqualene-lanosterol cyclase with a predicted role in ergosterol metabolism	erg7 (erg7A), erg7B and erg7C	0	0	0	0
	AN2684	ATF [T00051]	-1648	-1640	1.143588	GAGACGTCA	0.22615	0.22467	-80					AN4042	CYP61A1	Putative C-22 sterol desaturase with a predicted role in sterol metabolism; putative cytochrome P450	erg5	0	0	0	0
	AN2684	ATF [T00049]	-1345	-1336	4.085055	TGACGTGGGA	0.36345	0.36347	-80					AN6506	AN6506	Putative C-4 sterol methyl oxidase with a predicted role in sterol metabolism	erg3A, erg3B and erg3C	0	0	0	0
	AN2684	CREB [T00163]	-1345	-1337	2.016592	TGACGTGGG	0.25845	0.25893	-80					AN6973	AN6973	Putative C-4 sterol methyl oxidase with a predicted role in sterol metabolism; expression reduced after exposure to farnesol	erg25 (erg25A) and erg25B	0	0	0	0
	AN2684	ATF-2 [T00167]	-1345	-1337	3.399922	TGACGTGGG	0.12923	0.13025	-80					AN8283	cyp51B	Putative sterol 14-demethylase with a predicted role in sterol metabolism; putative cytochrome P450	cyp51A and cyp51B	1	0	0	1
	AN2684	ATF [T00051]	-1345	-1337	1.911603	TGACGTGGG	0.21538	0.21555	-80					AN11008	AN11008	Ortholog(s) have drug binding, squalene monooxygenase activity	erg1	0	0	0	0
cyp51B	AN8283	ATF [T00051]	-509	-501	1.837301	TGACGTTGA	0.34706	0.33377	-212	YES				AN1901	pdmA	Putative sterol 14 alpha-demethylase with a predicted role in sterol metabolism	cyp51A and cyp51B	0	0	0	0
cyp51B	AN8283	ATF [T00049]	-509	-500	3.845748	TGACGTTGAG	0.58567	0.56575	-212	YES				AN7575	AN7575	Putative C-3 sterol dehydrogenase with a predicted role in sterol metabolism	erg26	0	0	0	0
cyp51B	AN8283	CREB [T00163]	-509	-501	2.041286	TGACGTTGA	0.41647	0.39591	-212	YES				AN11081	AN11081	Has domain(s) with predicted 3-beta-hydroxy-delta5-steroid dehydrogenase activity and role in oxidation-reduction process, steroid biosynthetic process	erg26	0	0	0	0
cyp51B	AN8283	ATF-2 [T00167]	-509	-501	3.281942	TGACGTTGA	0.20824	0.18684	-212	YES				AN8907	AN8907	Putative C-4 sterol methyl oxidase with a predicted role in sterol metabolism	erg25 (erg25A) and erg25B	1	0	0	1
	AN8907	ATF [T00049]	-551	-542	2.042527	AAAGACGTCA	0.02620	0.02566	-74	YES				AN2684	AN2684	Putative oxidoreductase with a predicted role in sterol metabolism	erg4A	0	0	0	0
	AN8907	ATF-1 [T00968]	-551	-541	4.896746	AAAGACGTCAC	0.00780	0.00771	-74	YES							S	2	0	1	3
	AN8907	CREB [T00163]	-550	-542	0.860495	AAGACGTCA	0.04990	0.04918	-74	YES										Sites/genes:	0.1875
	AN8907	CREB [T00164]	-550	-542	3.168624	AAGACGTCA	0.00998	0.00991	-74	YES
	AN8907	ATF-2 [T00167]	-550	-542	1.845671	AAGACGTCA	0.02994	0.02979	-74	YES
	AN8907	ATF [T00051]	-550	-542	1.292192	AAGACGTCA	0.03742	0.03715	-74	YES

## Sheet: Folate cycle
Table S6 Results of the promoter analyses.
Sheet 6 – “Folate cycle” genes
Gene	GeneID	Transcription factor	Start position	End position	Dissimilarity	String	RE equally	RE query	Pozition of the TSS	Between TSS-1000 and TSS+50	Between TSS+50 and ATG	Between ATG-1500 and ATG if no TSS
purH	AN4464	ATF [T00049]	-392	-383	2.042527	AATAACGTCA	0.03797	0.04000	-239	YES
purH	AN4464	CREB [T00989]	-392	-383	3.316248	AATAACGTCA	0.01899	0.02414	-239	YES
purH	AN4464	CREB [T00163]	-391	-383	1.056433	ATAACGTCA	0.07233	0.06524	-239	YES				Folate cycle genes				Number of sites
purH	AN4464	CREB [T00164]	-391	-383	2.180344	ATAACGTCA	0.03255	0.03562	-239	YES				GENE ID	Gene name	Feature (AspGD)		Between TSS-1000 and TSS+50	Between ATG and TSS+50	Between ATG-1500 and ATG if no TSS	Merge
purH	AN4464	ATF-2 [T00167]	-391	-383	1.252129	ATAACGTCA	0.02170	0.02319	-239	YES				AN5883	metF	Putative methylenetetrahydrofolate reductase (NADPH) with predicted role in one-carbon metabolism; mutation causes methionine auxotrophy and decreased mycelial pigment production; expression induced by homocysteine and decreased by farnesol		0	0	0	0
purH	AN4464	ATF [T00051]	-391	-383	0.933282	ATAACGTCA	0.07594	0.07726	-239	YES				AN8215	metA	Putative methylenetetrahydrofolate reductase (NADPH) with a predicted role in one-carbon metabolism; metA expression is induced by homocysteine; mutation causes methionine auxotrophy		0	0	0	0
	AN4776	ATF [T00049]	-1047	-1038	3.845748	CTACACGTCA	0.15617	0.14812	n.d.		YES			AN7028	AN7028	Putative thymidylate synthase with a predicted role in pyrimidine metabolism		0	0	0	0
	AN4776	CREB [T00163]	-1046	-1038	1.875772	TACACGTCA	0.11105	0.10392	n.d.		YES			AN3058	AN3058	Putative glycine hydroxymethyltransferase with a predicted role in glycine, serine, and threonine metabolism		0	0	0	0
	AN4776	ATF-2 [T00167]	-1046	-1038	3.232908	TACACGTCA	0.10180	0.10047	n.d.		YES			AN1198	AN1198	Putative aminomethyltransferase with a predicted role in glycine, serine, and threonine metabolism		0	0	0	0
	AN4776	ATF [T00051]	-1046	-1038	1.837301	TACACGTCA	0.09254	0.08745	n.d.		YES			AN4776	AN4776	Ortholog(s) have cell division site, cell tip, cytosol, nucleus localization		0	1	0	1
														AN6108	AN6108	Ortholog(s) have dihydrofolate reductase activity, drug binding activity		0	0	0	0
														AN5738	AN5738	Ortholog(s) have methionyl-tRNA formyltransferase activity, role in conversion of methionyl-tRNA to N-formyl-methionyl-tRNA and mitochondrion localization		0	0	0	0
														AN0495	AN0495	Has domain(s) with predicted amino acid binding, formyltetrahydrofolate deformylase activity, hydroxymethyl-, formyl- and related transferase activity and role in 'de novo' IMP biosynthetic process, biosynthetic process, metabolic process		0	0	0	0
														AN4464	purH	Putative bifunctional enzyme with a predicted role in purine metabolism; protein expressed at increased levels in a hapX mutant versus wild-type		1	0	0	1
														AN2998	AN2998	Putative multifunctional enzyme with a predicted role in one-carbon metabolism; palA-dependent expression independent of pH		0	0	0	0
														AN1198	AN1198	Putative aminomethyltransferase with a predicted role in glycine, serine, and threonine metabolism		0	0	0	0
														AN1524	AN1524	Putative methylenetetrahydrofolate dehydrogenase (NAD+) with a predicted role in one-carbon metabolism		0	0	0	0
																	S	1	1	0	2
																				Sites/genes:	0.153846

## Sheet: Asperfuranone
Table S6 Results of the promoter analyses.
Sheet 7 – “Asperfuranone secondary metabolite cluster” genes
Gene	GeneID	Transcription factor	Start position	End position	Dissimilarity	String	RE equally	RE query	Pozition of the TSS	Between TSS-1000 and TSS+50	Between TSS+50 and ATG	Between ATG-1500 and ATG if no TSS
														Asperfuranone (afo) cluster genes				Number of sites
														GENE ID	Gene name	Feature (AspGD)		Between TSS-1000 and TSS+50	Between ATG and TSS+50	Between ATG-1500 and ATG if no TSS	Merge
														AN1036	afoG	Putative polyketide synthase; required for asperfuranone biosynthesis; transcriptionally induced by scrP overexpression		0	0	0	0
														AN11287	AN11287	Protein of unknown function		0	0	0	0
														AN1035	afoF	Putative FAD/FMN-dependent oxygenase; required for asperfuranone biosynthesis		0	0	0	0
														AN1034	afoE	Putative polyketide synthase; required for asperfuranone biosynthesis; transcriptionally induced by scrP overexpression		0	0	0	0
														AN1033	afoD	Putative salicylate hydroxylase; required for asperfuranone biosynthesis; transcriptionally induced by scrP overexpression		0	0	0	0
														AN1032	afoC	Putative oxidoreductase; required for asperfuranone biosynthesis		0	0	0	0
														AN1031	afoB	Putative efflux pump; involved in asperfuranone biosynthesis		0	0	0	0
														AN1030	AN1030	Has domain(s) with predicted oxidoreductase activity. transferase activity. transferring acyl groups other than amino-acyl groups activity and role in oxidation-reduction process		0	0	0	0
														AN1029	afoA	Protein with homology to CtnR. citrinin biosynthesis transcriptional activator; contains a Zn(2)Cys(6) domain; involved in asperfuranone biosynthesis; overexpression induces expression of the asperfuranone biosynthesis gene cluster		0	0	0	0
																	S	0	0	0	0
																			Sites/genes:		0

## Sheet: Summary
Table S6 Results of the promoter analyses.
Sheet 8 – Summary of the results with A. fumigatus, A. niger and A. oryzae genes
	A. nidulans		Number of putative TF binding sites			A.fumigatus		Number of putative TF binding sites			A.niger		Number of putative TF binding sites			A.oryzae		Number of putative TF binding sites
	Gene name	Gene ID	A	B	C	Gene name	Gene ID	A	B	C	Gene name	Gene ID	A	B	C	Gene name	Gene ID	A	B	C
1	catA	AN8637	1			catA	Afu6g03890			3	catA	An09g03130			2	catA	AO090701000158	3
												An14g00690	1
2	catB	AN9339	1			cat1	Afu3g02270	1			cat1	An01g01550			1	catB	AO090120000068
		S	2	0	0		S	1	0	3		S	1	0	3		S	3	0	0
3	tcsA	AN5296				fos1	Afu6g10240	1				An15g02120					AO090023000259	1	2
												An11g01000
4	tcsB	AN1800	1			tcsB	Afu2g00660					An07g08100a					AO090011000093
5	nikA	AN4479				tcsC	Afu2g03560					An07g08100					AO090120000228
6	phkA	AN3102	1			phkA	Afu3g12550	3				An02g08510	1				AO090005000714
7	phkB	AN3101	1	1		phkB	Afu3g12530	1				An02g08490	1				AO090005000715
8	sskA	AN7697				ssk1	Afu5g08390					An03g04670					AO090701000762
9	fphA	AN9008	2			fphA	Afu4g02900					An14g02970				fphA	AO090001000178	2
10	ypdA	AN2005	2			ypd1	Afu4g10280					An04g06570					AO090003001194			1
11	srrA	AN3688		1		skn7	Afu6g12522					An06g01690					AO090003001583
12	srrB	AN7572			1		Afu2g15010	1				An15g03140					AO090012000420
13	srrC	AN4134				tcsC	Afu2g03560					An07g08100					AO090010000496a	1
14	hk2	AN7945	2	1		tcsB	Afu2g00660a					An10g00250					AO090023000034a	1
15-21	hk-8-1	AN2581b				fhk2	Afu3g07130b		1			An02g13590b			1		AO090010000516b
	hk-8-2	AN4113b	1			fhk6	Afu4g00320b					An12g10550b		1			AO090020000218b
	hk-8-3	AN6820b	1	3		fhk1	Afu4g01020b					An18g01860b					AO090701000517b	1	1
	hk-8-4	AN4818b				fhk5	Afu4g00660b	1									AO090138000206b	2
	hk-8-5	AN3214b				fhk3	Afu8g06140b										AO090003001579b
	hk-8-6	AN2363b	1
	hk-8-7	AN9048b
22	hk-9	AN4447	1			fhk4	Afu4g07400					An04g01790					AO090023000833
		S	13	6	1		S	7	1	0		S	2	1	1		S	8	3	1
		S (genes):	20				S (genes):	18				S (genes):	17				S (genes):	18
		S (genes with binding sites):	12				S (genes with binding sites):	6				S (genes with binding sites):	4c				S (genes with binding sites):	7
		S (binding sites):	20				S (binding sites):	8				S (binding sites):	4d				S (binding sites):	12
	a -	Best hit for the A. nidulans gene
	b -	Paralogue genes
	c -	The ratio of genes with putative binding sites and genes without putative binding sites in the gene group is significantly smaller than that is in the gene group of A. nidulans according to the Fisher’s exact test (p < 0.05).
	d -	The ratio of putative binding sites and genes in the gene group is significantly smaller than that is in the gene group of A. nidulans according to the Mann-Whitney-Wilcoxon test (p < 0.05).
	A -	Between TSS-1000 and TSS+50
	B -	Between TSS+50 and ATG
	C -	Between ATG-1500 and ATG if no TSS

## Sheet: A. fumigatus
Table S6 Results of the promoter analyses.
Sheet 9 – Results with the A. fumigatus genes
Gene	GeneID	Transcription factor	Start position	End position	Dissimilarity	String	RE equally	RE query	Position of the TSS	Between TSS-1000 and TSS+50	Between TSS+50 and ATG	Between ATG-1500 and ATG if no TSS
catA	Afu6g03890	ATF [T00049]	-1533	-1524	4.085055	CCGAACGTCA	0.26264	0.25714	n.d.
catA	Afu6g03890	CREB [T00163]	-1532	-1524	2.016592	CGAACGTCA	0.18677	0.18130	n.d.
catA	Afu6g03890	ATF-2 [T00167]	-1532	-1524	3.247688	CGAACGTCA	0.17120	0.17306	n.d.
catA	Afu6g03890	ATF [T00051]	-1532	-1524	2.077547	CGAACGTCA	0.15564	0.15215	n.d.
catA	Afu6g03890	ATF [T00049]	-200	-191	3.845748	TGACGTTGAC	0.26264	0.25714	n.d.			YES
catA	Afu6g03890	CREB [T00163]	-200	-192	2.041286	TGACGTTGA	0.18677	0.18130	n.d.			YES
catA	Afu6g03890	ATF-2 [T00167]	-200	-192	3.281942	TGACGTTGA	0.09338	0.08714	n.d.			YES
catA	Afu6g03890	ATF [T00051]	-200	-192	1.837301	TGACGTTGA	0.15564	0.15215	n.d.			YES
catA	Afu6g03890	ATF [T00049]	-185	-176	4.085055	GCCAACGTCA	0.26264	0.25714	n.d.			YES
catA	Afu6g03890	CREB [T00163]	-184	-176	2.016592	CCAACGTCA	0.18677	0.18130	n.d.			YES
catA	Afu6g03890	ATF-2 [T00167]	-184	-176	3.247688	CCAACGTCA	0.17120	0.17306	n.d.			YES
catA	Afu6g03890	ATF [T00051]	-184	-176	1.911603	CCAACGTCA	0.15564	0.15215	n.d.			YES
catA	Afu6g03890	ATF [T00049]	-177	-168	4.085055	CAGAACGTCA	0.26264	0.25714	n.d.			YES
catA	Afu6g03890	CREB [T00163]	-176	-168	2.049517	AGAACGTCA	0.18677	0.18130	n.d.			YES
catA	Afu6g03890	ATF-2 [T00167]	-176	-168	3.264815	AGAACGTCA	0.09338	0.08714	n.d.			YES
catA	Afu6g03890	ATF [T00051]	-176	-168	1.928943	AGAACGTCA	0.15564	0.15215	n.d.			YES
catB	Afu3g02270	ATF [T00051]	-4466	-4458	1.052623	TGACGTAGA	0.36265	0.37284	-121
catB	Afu3g02270	ATF [T00049]	-4466	-4457	3.845748	TGACGTAGAA	0.58283	0.56722	-121
catB	Afu3g02270	CREB [T00163]	-4466	-4458	1.700116	TGACGTAGA	0.20723	0.21345	-121
catB	Afu3g02270	ATF-2 [T00167]	-4466	-4458	2.977473	TGACGTAGA	0.37992	0.38576	-121
catB	Afu3g02270	ATF [T00051]	-3039	-3031	2.003245	TGACGTTCA	0.34538	0.33483	-121
catB	Afu3g02270	ATF [T00049]	-3039	-3030	3.845748	TGACGTTCAG	0.58283	0.56722	-121
catB	Afu3g02270	CREB [T00163]	-3039	-3031	2.041286	TGACGTTCA	0.41446	0.39779	-121
catB	Afu3g02270	ATF-2 [T00167]	-3039	-3031	3.281942	TGACGTTCA	0.20723	0.18922	-121
catB	Afu3g02270	ATF [T00051]	-2066	-2058	2.003245	TGACGTTCA	0.34538	0.33483	-121
catB	Afu3g02270	ATF [T00049]	-2066	-2057	3.606442	TGACGTTCAT	0.03886	0.04402	-121
catB	Afu3g02270	CREB [T00163]	-2066	-2058	2.041286	TGACGTTCA	0.41446	0.39779	-121
catB	Afu3g02270	ATF-2 [T00167]	-2066	-2058	3.281942	TGACGTTCA	0.20723	0.18922	-121
catB	Afu3g02270	ATF [T00049]	-781	-772	3.845748	AGCAACGTCA	0.58283	0.56722	-121	YES
catB	Afu3g02270	ATF [T00051]	-780	-772	1.614395	GCAACGTCA	0.25904	0.23369	-121	YES
catB	Afu3g02270	CREB [T00163]	-780	-772	2.041286	GCAACGTCA	0.41446	0.39779	-121	YES
catB	Afu3g02270	ATF-2 [T00167]	-780	-772	3.230561	GCAACGTCA	0.37992	0.38576	-121	YES
	Afu2g15010	ATF [T00051]	-2944	-2936	2.003245	TGACGTGCA	0.28221	0.27378	-959
	Afu2g15010	CREB [T00163]	-2944	-2936	2.041286	TGACGTGCA	0.33865	0.32538	-959
	Afu2g15010	ATF-2 [T00167]	-2944	-2936	3.434176	TGACGTGCA	0.16933	0.15505	-959
	Afu2g15010	ATF [T00049]	-2944	-2935	3.845748	TGACGTGCAG	0.47623	0.46380	-959
	Afu2g15010	ATF [T00051]	-1692	-1683	0.784678	TGACGTTAC	0.29632	0.30436	-959	YES
	Afu2g15010	CREB [T00163]	-1692	-1683	1.048202	TGACGTTAC	0.28221	0.27012	-959	YES
	Afu2g15010	ATF-2 [T00167]	-1692	-1683	1.217875	TGACGTTAC	0.08466	0.09333	-959	YES
	Afu2g15010	CREB [T00164]	-1692	-1683	2.120918	TGACGTTAC	0.12700	0.13604	-959	YES
	Afu2g15010	ATF [T00049]	-1692	-1682	2.281833	TGACGTTACA	0.19049	0.17900	-959	YES
	Afu2g15010	CREB [T00989]	-1692	-1682	3.204301	TGACGTTACA	0.09525	0.09623	-959	YES
	Afu2g15010	CRE-BP2 [T01017]	-1692	-1683	4.875734	TGACGTTAC	0.02822	0.02762	-959	YES
fhk2	Afu3g07130	ATF-1 [T00968]	-141	-130	2.071621	CTGACGTCGAC	0.00308	0.00257	-849		YES
fhk2	Afu3g07130	CREB [T00163]	-140	-131	1.017777	TGACGTCGA	0.12337	0.11548	-849		YES
fhk2	Afu3g07130	ATF [T00051]	-140	-131	1.366494	TGACGTCGA	0.09253	0.08119	-849		YES
fhk2	Afu3g07130	ATF [T00049]	-140	-130	2.042527	TGACGTCGAC	0.06477	0.06720	-849		YES
fhk2	Afu3g07130	ATF-2 [T00167]	-140	-131	2.064067	TGACGTCGA	0.07402	0.06397	-849		YES
fhk2	Afu3g07130	CREB [T00164]	-140	-131	3.439926	TGACGTCGA	0.03084	0.02466	-849		YES
phkB	Afu3g12530	ATF [T00049]	-2066	-2056	2.281833	CGTAACGTCA	0.16469	0.15035	-671
phkB	Afu3g12530	CREB [T00989]	-2066	-2056	2.840592	CGTAACGTCA	0.08235	0.08163	-671
phkB	Afu3g12530	ATF [T00051]	-2065	-2056	0.784678	GTAACGTCA	0.25619	0.25635	-671
phkB	Afu3g12530	CREB [T00163]	-2065	-2056	1.048202	GTAACGTCA	0.24399	0.22630	-671
phkB	Afu3g12530	ATF-2 [T00167]	-2065	-2056	1.217875	GTAACGTCA	0.07320	0.07877	-671
phkB	Afu3g12530	CREB [T00164]	-2065	-2056	2.120918	GTAACGTCA	0.10979	0.11497	-671
phkB	Afu3g12530	CRE-BP2 [T01017]	-2065	-2056	4.875734	GTAACGTCA	0.02440	0.02283	-671
phkB	Afu3g12530	ATF [T00049]	-866	-856	3.845748	ACATACGTCA	0.41173	0.38956	-671	YES
phkB	Afu3g12530	ATF [T00051]	-865	-856	1.126925	CATACGTCA	0.25619	0.25635	-671	YES
phkB	Afu3g12530	CREB [T00163]	-865	-856	1.509908	CATACGTCA	0.14639	0.14635	-671	YES
phkB	Afu3g12530	ATF-2 [T00167]	-865	-856	2.741950	CATACGTCA	0.02440	0.02472	-671	YES
phkB	Afu3g12530	CREB [T00164]	-865	-856	4.825740	CATACGTCA	0.18299	0.18579	-671	YES
phkA	Afu3g12550	ATF [T00049]	-1110	-1100	2.042527	TTCGACGTCA	0.06273	0.06593	-287	YES
phkA	Afu3g12550	CREB [T00163]	-1109	-1100	1.017777	TCGACGTCA	0.11948	0.11215	-287	YES
phkA	Afu3g12550	ATF [T00051]	-1109	-1100	1.366494	TCGACGTCA	0.08961	0.07816	-287	YES
phkA	Afu3g12550	ATF-2 [T00167]	-1109	-1100	2.064067	TCGACGTCA	0.07169	0.06136	-287	YES
phkA	Afu3g12550	CREB [T00164]	-1109	-1100	3.439926	TCGACGTCA	0.02987	0.02351	-287	YES
phkA	Afu3g12550	ATF [T00051]	-556	-547	0.995660	TGACGTACC	0.12545	0.12895	-287	YES
phkA	Afu3g12550	CREB [T00163]	-556	-547	1.700116	TGACGTACC	0.07169	0.07381	-287	YES
phkA	Afu3g12550	ATF-2 [T00167]	-556	-547	2.926092	TGACGTACC	0.13142	0.13324	-287	YES
phkA	Afu3g12550	ATF [T00049]	-556	-546	3.845748	TGACGTACCT	0.20162	0.19392	-287	YES
phkA	Afu3g12550	ATF-1 [T00968]	-271	-260	4.797430	GTGACGTCTGT	0.01867	0.01641	-287	YES
phkA	Afu3g12550	CREB [T00163]	-270	-261	0.827569	TGACGTCTG	0.11948	0.11215	-287	YES
phkA	Afu3g12550	ATF [T00051]	-270	-261	1.440796	TGACGTCTG	0.08961	0.07816	-287	YES
phkA	Afu3g12550	ATF-2 [T00167]	-270	-261	1.828544	TGACGTCTG	0.07169	0.06136	-287	YES
phkA	Afu3g12550	ATF [T00049]	-270	-260	2.042527	TGACGTCTGT	0.06273	0.06593	-287	YES
phkA	Afu3g12550	CREB [T00164]	-270	-261	3.129007	TGACGTCTG	0.02390	0.02305	-287	YES
fhk5	Afu4g00660	ATF [T00049]	-519	-509	0.239306	AATGACGTCA	0.00816	0.00845	-342	YES
fhk5	Afu4g00660	CREB [T00989]	-519	-509	0.475656	AATGACGTCA	0.01398	0.01417	-342	YES
fhk5	Afu4g00660	CREB [T00163]	-518	-509	0.032925	ATGACGTCA	0.01865	0.01833	-342	YES
fhk5	Afu4g00660	ATF-2 [T00167]	-518	-509	0.034254	ATGACGTCA	0.01865	0.01833	-342	YES
fhk5	Afu4g00660	CREB [T00164]	-518	-509	0.059427	ATGACGTCA	0.01865	0.01833	-342	YES
fhk5	Afu4g00660	ATF [T00051]	-518	-509	0.462475	ATGACGTCA	0.02331	0.02321	-342	YES
fhk5	Afu4g00660	CRE-BP2 [T01017]	-518	-509	0.467691	ATGACGTCA	0.01398	0.01404	-342	YES
fhk5	Afu4g00660	ATF-1 [T00968]	-518	-507	4.239311	ATGACGTCAAT	0.01049	0.00979	-342	YES
fhk5	Afu4g00660	ATF [T00049]	-517	-507	0.000000	TGACGTCAAT	0.00816	0.00845	-342	YES
fhk5	Afu4g00660	CREB [T00164]	-517	-508	0.019809	TGACGTCAA	0.01865	0.01833	-342	YES
fhk5	Afu4g00660	CREB [T00163]	-517	-508	0.024694	TGACGTCAA	0.01865	0.01833	-342	YES
fhk5	Afu4g00660	ATF-2 [T00167]	-517	-508	0.051381	TGACGTCAA	0.01865	0.01833	-342	YES
fhk5	Afu4g00660	CRE-BP2 [T01017]	-517	-508	0.467691	TGACGTCAA	0.01398	0.01404	-342	YES
fhk5	Afu4g00660	CREB [T00989]	-517	-507	0.475656	TGACGTCAAT	0.01398	0.01417	-342	YES
fhk5	Afu4g00660	ATF [T00051]	-517	-508	0.536777	TGACGTCAA	0.02331	0.02321	-342	YES
ypd1	Afu4g10280	ATF [T00049]	-3030	-3020	3.845748	CTAAACGTCA	0.54524	0.53245	n.d.
ypd1	Afu4g10280	ATF [T00051]	-3029	-3020	1.837301	TAAACGTCA	0.32310	0.31478	n.d.
ypd1	Afu4g10280	CREB [T00163]	-3029	-3020	1.875772	TAAACGTCA	0.38773	0.37496	n.d.
ypd1	Afu4g10280	ATF-2 [T00167]	-3029	-3020	3.080673	TAAACGTCA	0.35542	0.35683	n.d.
ypd1	Afu4g10280	ATF [T00049]	-2155	-2145	4.085055	CCCTACGTCA	0.54524	0.53245	n.d.
ypd1	Afu4g10280	ATF [T00051]	-2154	-2145	1.126925	CCTACGTCA	0.33926	0.34405	n.d.
ypd1	Afu4g10280	CREB [T00163]	-2154	-2145	1.675422	CCTACGTCA	0.19386	0.19674	n.d.
ypd1	Afu4g10280	ATF-2 [T00167]	-2154	-2145	2.943219	CCTACGTCA	0.35542	0.35683	n.d.
fos-1	Afu6g10240	ATF [T00051]	-610	-601	1.911603	TGACGTGGG	0.14786	0.14487	-519	YES
fos-1	Afu6g10240	ATF [T00049]	-610	-600	3.845748	TGACGTGGGT	0.24951	0.24520	-519	YES
fos-1	Afu6g10240	CREB [T00163]	-610	-601	2.016592	TGACGTGGG	0.17743	0.17263	-519	YES
fos-1	Afu6g10240	ATF-2 [T00167]	-610	-601	3.399922	TGACGTGGG	0.08871	0.08338	-519	YES

[truncated: 2 more sheets: A. niger, A. oryzae]
